# Supplementary material for: Effects of Weaning on Intestinal Upper Villus Epithelial Cells of Piglets
Source: PLoS One. 2016 Mar 29;11(3):e0150216. doi: 10.1371/journal.pone.0150216 (PMC4811545; doi:10.1371/journal.pone.0150216)
Supplement: S2 Text — (XLSX) [file pone.0150216.s002.xlsx]

## Sheet: DATA
Gene	Uniprot_Swissprot Identity	W0d/W0d	W1d/W0d	W3d/W0d	W5d/W0d	W7d/W0d
gi|350597193|ref|XP_003484383.1| PREDICTED: LOW QUALITY PROTEIN: peptidyl-prolyl cis-trans isomerase B [Sus scrofa]	sp|Q1HKB1|ATP6_CANLU	1	0.561519	0.318808	0.385614	0.172541
gi|51317314|sp|P62802.2|H4_PIG RecName: Full=Histone H4 >gi|350583428|ref|XP_003481515.1| PREDICTED: histone H4-like [Sus scrofa] >gi|335291880|ref|XP_003356614.1| PREDICTED: histone H4-like [Sus scrofa] >gi|335287016|ref|XP_003355252.1| PREDICTED: histone H4-like [Sus scrofa] >g	sp|P33097|AATC_BOVIN	1	0.229242	0.229242	0.165162	0.176895
gi|311245810|ref|XP_001924714.2| PREDICTED: GTP:AMP phosphotransferase, mitochondrial isoform 1 [Sus scrofa]	sp|P28062|PSB8_HUMAN	1	0.9312	0.7056	0.408	0.1824
gi|229626|prf||770504A hemoglobin alpha	sp|Q58DA0|PSMD4_BOVIN	1	1.28803	0.98783	0.3286	0.194726
gi|350591483|ref|XP_003358588.2| PREDICTED: acyl-CoA dehydrogenase family member 9, mitochondrial-like [Sus scrofa]	sp|Q02367|NDUB6_BOVIN	1	0.638454	0.587252	0.471264	0.197492
gi|56404321|sp|Q71LE2.3|H33_PIG RecName: Full=Histone H3.3 >gi|47522626|ref|NP_999095.1| histone H3.3 [Sus scrofa] >gi|311266778|ref|XP_003131242.1| PREDICTED: histone H3.3-like [Sus scrofa] >gi|18643343|gb|AAL76273.1|AF469469_1 histone H3.3A [Sus scrofa]	sp|P06703|S10A6_HUMAN	1	0.355963	0.284098	0.388991	0.201223
gi|47523924|ref|NP_999599.1| beta-casein precursor [Sus scrofa] >gi|729045|sp|P39037.1|CASB_PIG RecName: Full=Beta-casein; Flags: Precursor >gi|157092750|gb|ABV22548.1| beta casein [Sus scrofa] >gi|407017|emb|CAA38718.1| beta-casein [Sus scrofa]	sp|Q4R802|AKCL2_MACFA	1	0.161534	0.124044	0.276301	0.217961
gi|335294002|ref|XP_003357106.1| PREDICTED: 3-hydroxybutyrate dehydrogenase type 2-like isoform 2 [Sus scrofa] >gi|335294000|ref|XP_003129333.2| PREDICTED: 3-hydroxybutyrate dehydrogenase type 2-like isoform 1 [Sus scrofa]	sp|O97764|QOR_BOVIN	1	0.7731	0.353745	0.373975	0.222526
gi|343403779|ref|NP_001230274.1| ribosomal protein L13 [Sus scrofa]	sp|P23396|RS3_HUMAN	1	1.06794	0.557895	0.496651	0.233014
gi|262072813|dbj|BAI47714.1| hydroxysteroid (17-beta) dehydrogenase 12 [Sus scrofa]	sp|Q5RFG0|ECH1_PONAB	1	0.896479	0.416901	0.467606	0.243662
gi|350591034|ref|XP_003483187.1| PREDICTED: glycerol-3-phosphate dehydrogenase 1-like protein-like [Sus scrofa]	sp|Q3T0Q4|NDKB_BOVIN	1	1.18963	0.410641	0.491814	0.253752
gi|311252239|ref|XP_003124992.1| PREDICTED: all-trans-retinol 13,14-reductase [Sus scrofa]	sp|P20000|ALDH2_BOVIN	1	0.495029	0.300366	0.348509	0.253794
gi|343072|gb|AAA32030.1| ATPase 8, partial (mitochondrion) [Sus scrofa]	sp|Q6GLE7|TBB5_XENTR	1	0.497731	0.497731	0.554463	0.260212
gi|335299797|ref|XP_003358684.1| PREDICTED: 1-phosphatidylinositol-4,5-bisphosphate phosphodiesterase eta-1 [Sus scrofa]	sp|Q5R7Z5|MARE1_PONAB	1	0.603093	0.254296	0.208763	0.260309
gi|75074354|sp|Q9GL51.3|LIS1_PIG RecName: Full=Platelet-activating factor acetylhydrolase IB subunit alpha; AltName: Full=Lissencephaly-1 protein; Short=LIS-1; AltName: Full=PAF acetylhydrolase 45 kDa subunit; Short=PAF-AH 45 kDa subunit; AltName: Full=PAF-AH alpha; Short=PAFAH alp	sp|P61751|ARF4_RAT	1	0.765464	0.563574	0.527491	0.264605
gi|194038540|ref|XP_001929175.1| PREDICTED: ectonucleoside triphosphate diphosphohydrolase 5 [Sus scrofa]	sp|P13618|ATP5J_PIG	1	0.636308	0.437538	0.293538	0.276308
gi|48675953|ref|NP_001001643.1| rab GDP dissociation inhibitor beta [Sus scrofa] >gi|75043802|sp|Q6Q7J2.1|GDIB_PIG RecName: Full=Rab GDP dissociation inhibitor beta; Short=Rab GDI beta; AltName: Full=Guanosine diphosphate dissociation inhibitor 2; Short=GDI-2 >gi|45758488|gb|AAS76	sp|Q03013|GSTM4_HUMAN	1	1.18	0.641111	0.487778	0.28
gi|135435|sp|P02550.1|TBA1A_PIG RecName: Full=Tubulin alpha-1A chain; AltName: Full=Alpha-tubulin 1; AltName: Full=Tubulin alpha-1 chain >gi|118137996|pdb|2HXF|A Chain A, Kif1a Head-Microtubule Complex Structure In Amppnp-Form >gi|118137999|pdb|2HXH|A Chain A, Kif1a Head-Microtubu	sp|Q9JJZ4|UB2J1_MOUSE	1	2.15363	0.837989	0.459963	0.282123
gi|350597119|ref|XP_003484358.1| PREDICTED: alpha-N-acetylgalactosaminidase-like [Sus scrofa]	sp|Q2KIR1|SNRPA_BOVIN	1	0.733042	0.743982	0.448578	0.284464
gi|311277261|ref|XP_003135572.1| PREDICTED: 55 kDa erythrocyte membrane protein-like isoform 1 [Sus scrofa]	sp|P62996|TRA2B_MOUSE	1	0.795675	0.514541	0.645041	0.294556
gi|47523768|ref|NP_999520.1| epoxide hydrolase 1 precursor [Sus scrofa] >gi|75069447|sp|P79381.1|HYEP_PIG RecName: Full=Epoxide hydrolase 1; AltName: Full=Epoxide hydratase; AltName: Full=Microsomal epoxide hydrolase >gi|1840391|dbj|BAA19200.1| epoxide hydrolase [Sus scrofa]	sp|P05059|CMGA_BOVIN	1	1.11473	0.458927	0.484046	0.295995
gi|1170740|sp|P00339.3|LDHA_PIG RecName: Full=L-lactate dehydrogenase A chain; Short=LDH-A; AltName: Full=LDH muscle subunit; Short=LDH-M >gi|473571|gb|AAA50436.1| lactate dehydrogenase-A [Sus scrofa domesticus]	sp|P19858|LDHA_BOVIN	1	0.923878	0.519231	0.491987	0.298878
gi|47523086|ref|NP_999309.1| peroxiredoxin-5, mitochondrial [Sus scrofa] >gi|10305336|gb|AAG13452.2|AF110735_1 peroxiredoxin 5 [Sus scrofa]	sp|Q5RBW2|ATP5I_PONAB	1	1.17375	0.667072	0.403402	0.301337
gi|340007402|ref|NP_001229989.1| RAB10, member RAS oncogene family [Sus scrofa]	sp|Q99497|PARK7_HUMAN	1	1.50044	0.399068	0.560151	0.307311
gi|311258000|ref|XP_003127386.1| PREDICTED: AP-2 complex subunit alpha-1 isoform 1 [Sus scrofa]	sp|Q53VB8|FRIL_CANFA	1	0.935702	0.617597	0.598985	0.311337
gi|311273122|ref|XP_003133724.1| PREDICTED: LOW QUALITY PROTEIN: 2-acylglycerol O-acyltransferase 1-like [Sus scrofa]	sp|P80404|GABT_HUMAN	1	0.803653	0.321918	0.410046	0.313242
gi|350582674|ref|XP_003125400.3| PREDICTED: apolipoprotein B-100-like [Sus scrofa]	sp|P06396|GELS_HUMAN	1	1.45714	0.90119	0.772619	0.315476
gi|350538593|ref|NP_001233247.1| phosphoglucomutase-1 [Sus scrofa] >gi|321574209|gb|ADW94631.1| phosphoglucomutase 1 [Sus scrofa]	sp|P19440|GGT1_HUMAN	1	1.13519	0.39662	0.450298	0.318091
gi|3746946|gb|AAC64131.1| phosphoglucomutase 1 [Sus scrofa] >gi|3746944|gb|AAC64130.1| phosphoglucomutase 1 [Sus scrofa]	sp|Q06AT0|HPCL1_PIG	1	0.757407	0.359382	0.316015	0.321168
gi|194039882|ref|XP_001928584.1| PREDICTED: histone H2B type 1-H-like [Sus scrofa]	sp|Q52RN5|SODC_BOSMU	1	0.20438	0.416058	0.408759	0.321168
gi|350539577|ref|NP_001233167.1| coatomer subunit gamma-2 [Sus scrofa] >gi|301087607|gb|ADK56184.1| coatomer protein complex subunit gamma 2 [Sus scrofa]	sp|P40763|STAT3_HUMAN	1	0.792959	0.451074	0.542959	0.323986
gi|148226851|ref|NP_001090933.1| ATP synthase subunit f, mitochondrial [Sus scrofa] >gi|117660512|gb|ABK55624.1| mitochondrial Atp5j2 [Sus scrofa]	sp|Q60HG7|CGL_MACFA	1	2.39079	0.505171	0.514886	0.340019
gi|335308671|ref|XP_003361329.1| PREDICTED: 60S ribosomal protein L23a-like [Sus scrofa] >gi|311267953|ref|XP_003131820.1| PREDICTED: 60S ribosomal protein L23a-like [Sus scrofa]	sp|P20061|TCO1_HUMAN	1	0.498141	0.728625	0.392813	0.343247
gi|311251336|ref|XP_003124563.1| PREDICTED: elongation factor Tu, mitochondrial-like [Sus scrofa]	sp|P31404|VATA_BOVIN	1	0.801291	0.555095	0.502536	0.343476
gi|238018148|ref|NP_001153899.1| ADP-ribosylation factor 1 [Sus scrofa] >gi|212725657|gb|ACJ38117.1| ADP-ribosylation factor 1 [Sus scrofa] >gi|237638742|gb|ACR07973.1| ADP-ribosylation factor 1 [Sus scrofa]	sp|P01871|IGHM_HUMAN	1	1.08433	0.631944	0.828373	0.345238
gi|164543|gb|AAA31072.1| malate dehydrogenase (EC 1.1.1.37), partial [Sus scrofa]	sp|P00570|KAD1_BOVIN	1	1.57264	0.499437	0.628941	0.346284
gi|227130|prf||1614425A chymodenin	sp|P48147|PPCE_HUMAN	1	0.334628	0.333569	0.292976	0.346982
gi|4033507|sp|P08132.2|ANXA4_PIG RecName: Full=Annexin A4; AltName: Full=35-beta calcimedin; AltName: Full=Annexin IV; AltName: Full=Annexin-4; AltName: Full=Chromobindin-4; AltName: Full=Endonexin I; AltName: Full=Lipocortin IV; AltName: Full=P32.5; AltName: Full=PP4-X; AltName: F	sp|O70325|GPX41_MOUSE	1	1.28074	1.4021	1.00809	0.349515
gi|350583409|ref|XP_003125823.3| PREDICTED: Golgi phosphoprotein 3-like [Sus scrofa]	sp|P46193|ANXA1_BOVIN	1	1.89382	0.691949	0.795799	0.351225
gi|47523672|ref|NP_999468.1| 2~-5~-oligoadenylate synthase 1 [Sus scrofa] >gi|6226834|sp|Q29599.3|OAS1_PIG RecName: Full=2~-5~-oligoadenylate synthase 1; Short=(2-5~)oligo(A) synthase 1; Short=2-5A synthase 1; AltName: Full=p42 OAS >gi|3451331|emb|CAA12397.1| 2~-5~ oligoadenyla	sp|P68370|TBA1A_RAT	1	0.752587	0.600789	0.658452	0.353376
gi|347300243|ref|NP_001231430.1| glutamate dehydrogenase 1, mitochondrial [Sus scrofa]	sp|Q29443|TRFE_BOVIN	1	0.831343	0.761194	0.685075	0.356716
gi|311253520|ref|XP_003125581.1| PREDICTED: 60S ribosomal protein L35a-like [Sus scrofa]	sp|P27348|1433T_HUMAN	1	1.05333	0.979259	1.04889	0.357037
gi|350584800|ref|XP_003355778.2| PREDICTED: cytochrome c oxidase subunit 4 isoform 1, mitochondrial-like [Sus scrofa]	sp|P12821|ACE_HUMAN	1	0.688277	0.622558	0.552398	0.357904
gi|311253799|ref|XP_001926739.2| PREDICTED: ras-related protein Rab-2A [Sus scrofa]	sp|Q6EIY9|K2C1_CANFA	1	1.23159	0.727663	0.816297	0.360972
gi|264681430|ref|NP_001161110.1| 3-ketoacyl-CoA thiolase, mitochondrial [Sus scrofa] >gi|262036903|dbj|BAI47587.1| acetyl-Coenzyme A acyltransferase 2 [Sus scrofa]	sp|P49171|RS26_PIG	1	1.04056	0.451912	0.451912	0.36153
gi|222090420|gb|ACM42418.1| carnitine palmitoyltransferase II [Sus scrofa]	sp|Q5R4R8|EF1A1_PONAB	1	1.3874	0.752625	0.592765	0.361727
gi|335290197|ref|XP_003356098.1| PREDICTED: LOW QUALITY PROTEIN: 40S ribosomal protein S9-like, partial [Sus scrofa]	sp|P62305|RUXE_MOUSE	1	0.663761	0.729763	0.667497	0.366127
gi|350582773|ref|XP_003481353.1| PREDICTED: 40S ribosomal protein S7-like isoform 2 [Sus scrofa] >gi|350582771|ref|XP_003481352.1| PREDICTED: 40S ribosomal protein S7-like isoform 1 [Sus scrofa]	sp|Q5KR49|TPM1_BOVIN	1	0.750564	0.693002	0.600451	0.367946
gi|219521964|ref|NP_001137170.1| long-chain-fatty-acid--CoA ligase 3 [Sus scrofa] >gi|217314893|gb|ACK36981.1| acyl-CoA synthetase long-chain family member 3 [Sus scrofa]	sp|Q92598|HS105_HUMAN	1	0.85026	0.496094	0.588542	0.371094
gi|47523618|ref|NP_999441.1| citrate synthase, mitochondrial precursor [Sus scrofa] >gi|116470|sp|P00889.2|CISY_PIG RecName: Full=Citrate synthase, mitochondrial; Flags: Precursor >gi|164419|gb|AAA31017.1| citrate synthase precursor (EC 4.1.3.7) [Sus scrofa]	sp|Q28851|ATPK_BOVIN	1	0.995334	0.720062	0.583204	0.37325
gi|47522916|ref|NP_999215.1| glutathione S-transferase omega-1 [Sus scrofa] >gi|20141290|sp|Q9N1F5.2|GSTO1_PIG RecName: Full=Glutathione S-transferase omega-1; Short=GSTO-1; AltName: Full=Glutathione S-transferase omega 1-1; Short=GSTO 1-1; AltName: Full=Glutathione-dependent d	sp|P16110|LEG3_MOUSE	1	0.763971	0.752206	0.606618	0.373529
gi|311268489|ref|XP_003132080.1| PREDICTED: fatty aldehyde dehydrogenase-like [Sus scrofa]	sp|Q96PE7|MCEE_HUMAN	1	1.078	0.774156	0.619325	0.37369
gi|158514031|sp|A1XQU5.1|RL27_PIG RecName: Full=60S ribosomal protein L27 >gi|148226949|ref|NP_001090948.1| 60S ribosomal protein L27 [Sus scrofa] >gi|117661046|gb|ABK55651.1| RPL27 [Sus scrofa]	sp|P08397|HEM3_HUMAN	1	1.00733	0.912023	0.780059	0.375367
gi|350582213|ref|XP_003481224.1| PREDICTED: 60S ribosomal protein L7a-like [Sus scrofa] >gi|350582215|ref|XP_003481225.1| PREDICTED: 60S ribosomal protein L7a-like [Sus scrofa] >gi|335285208|ref|XP_003125024.2| PREDICTED: 60S ribosomal protein L7a-like isoform 1 [Sus scrofa]	sp|O00499|BIN1_HUMAN	1	0.72043	0.991398	0.494624	0.376344
gi|350587405|ref|XP_003482406.1| PREDICTED: cytosolic beta-glucosidase-like, partial [Sus scrofa]	sp|A7MBG0|PURA2_BOVIN	1	0.862345	0.474245	0.579929	0.377442
gi|335293615|ref|XP_003357006.1| PREDICTED: UDP-glucuronosyltransferase 2A1 [Sus scrofa]	sp|P05388|RLA0_HUMAN	1	0.907692	0.881781	0.940891	0.378138
gi|346716335|ref|NP_001231184.1| lysosome-associated membrane glycoprotein 2 isoform 1 precursor [Sus scrofa]	sp|Q5NVB5|PGK1_PONAB	1	0.860262	0.580786	0.60917	0.379913
gi|72535188|ref|NP_001026956.1| GTP-binding protein SAR1a [Sus scrofa] >gi|75060235|sp|Q52NJ3.1|SAR1A_PIG RecName: Full=GTP-binding protein SAR1a >gi|62868640|gb|AAY17508.1| GTP-binding protein SAR1a [Sus scrofa]	sp|P49327|FAS_HUMAN	1	0.914216	0.612745	0.588235	0.383578
gi|72535184|ref|NP_001026954.1| ADP-ribosylation factor-like protein 1 [Sus scrofa] >gi|62868636|gb|AAY17506.1| ADP-ribosylation factor-like protein 1 [Sus scrofa]	sp|Q15067|ACOX1_HUMAN	1	1.35406	0.737212	0.779338	0.389168
gi|335281047|ref|XP_003353724.1| PREDICTED: LOW QUALITY PROTEIN: long-chain fatty acid transport protein 4 [Sus scrofa]	sp|Q864W1|CFAB_PONPY	1	0.64881	0.445238	0.50119	0.389286
gi|329744642|ref|NP_001193288.1| glyceraldehyde-3-phosphate dehydrogenase [Sus scrofa] >gi|2506441|sp|P00355.4|G3P_PIG RecName: Full=Glyceraldehyde-3-phosphate dehydrogenase; Short=GAPDH; AltName: Full=Peptidyl-cysteine S-nitrosylase GAPDH	sp|A1XQU5|RL27_PIG	1	3.4413	1.09177	0.784076	0.391363
gi|194041608|ref|XP_001928080.1| PREDICTED: mitotic checkpoint protein BUB3 isoform 2 [Sus scrofa]	sp|Q29496|CP3AO_SHEEP	1	0.666667	0.789577	0.771878	0.393314
gi|13195731|gb|AAB21327.2| phospholipid hydroperoxide glutathione peroxidase [Sus scrofa]	sp|P29401|TKT_HUMAN	1	0.246063	0.509186	0.487533	0.395013
gi|85792253|gb|ABC84194.1| eukaryotic translation initiation factor 4A isoform 2 [Sus scrofa]	sp|Q5XIU9|PGRC2_RAT	1	0.862886	0.68176	0.54507	0.39526
gi|194041937|ref|XP_001928912.1| PREDICTED: alpha-centractin [Sus scrofa]	sp|P02769|ALBU_BOVIN	1	1.20522	0.540816	0.84127	0.395692
gi|347300325|ref|NP_001231461.1| dehydrogenase/reductase SDR family member 11 [Sus scrofa]	sp|P15497|APOA1_BOVIN	1	1.18753	0.658812	0.54001	0.397644
gi|346421380|ref|NP_001231062.1| ATP-binding cassette sub-family D member 3 [Sus scrofa]	sp|Q08DA1|AT1A1_BOVIN	1	1.24239	0.620147	0.626443	0.398741
gi|350584176|ref|XP_003481686.1| PREDICTED: myosin-Ia-like [Sus scrofa]	sp|P12337|EST1_RABIT	1	1.22663	0.70881	0.720915	0.400134
gi|114326183|ref|NP_001041537.1| ADP-ribosylation factor 4 [Sus scrofa] >gi|221327932|gb|ACM17702.1| ADP-ribosylation factor 4 [Sus scrofa] >gi|203283175|gb|ACH96700.1| ADP-ribosylation factor 4 [Sus scrofa] >gi|62208269|gb|AAX77012.1| ADP-ribosylation factor family-like protein [S	sp|Q3T145|MDHC_BOVIN	1	1.16211	0.538251	0.634791	0.401639
gi|350529419|ref|NP_001231941.1| inositol polyphosphate-1-phosphatase [Sus scrofa]	sp|Q3MHX5|SUCB2_BOVIN	1	1.23617	0.676383	0.731689	0.402093
gi|311277187|ref|XP_003135530.1| PREDICTED: translocon-associated protein subunit delta-like isoform 1 [Sus scrofa]	sp|O54873|AIMP1_CRIGR	1	1.02532	1.01477	0.5	0.402954
gi|347300323|ref|NP_001231460.1| thioredoxin-dependent peroxide reductase, mitochondrial [Sus scrofa]	sp|P22451|RL5_CHICK	1	0.510251	0.917995	0.580866	0.403189
gi|335284397|ref|XP_003354597.1| PREDICTED: major vault protein isoform 1 [Sus scrofa]	sp|Q9ERG0|LIMA1_MOUSE	1	0.827392	0.638837	0.641651	0.404315
gi|740987|prf||2006263A Arg Gly amidinotransferase	sp|P07148|FABPL_HUMAN	1	0.961864	0.372881	0.341102	0.40678
gi|350583690|ref|XP_003125999.3| PREDICTED: tetratricopeptide repeat protein 38-like [Sus scrofa]	sp|Q76MZ3|2AAA_MOUSE	1	1.03288	0.55012	0.607859	0.40818
gi|350591495|ref|XP_003132454.3| PREDICTED: coatomer subunit gamma [Sus scrofa]	sp|O03851|COX2_CERSI	1	1.0143	0.558627	0.747378	0.410867
gi|417185|sp|P80229.1|ILEU_PIG RecName: Full=Leukocyte elastase inhibitor; Short=LEI; AltName: Full=Leukocyte neutral proteinase inhibitor; Short=LNPI; AltName: Full=Serpin B1	sp|P06768|RET2_RAT	1	0.98265	0.585962	0.545741	0.410883
gi|47522710|ref|NP_999050.1| mannosyl-oligosaccharide 1,2-alpha-mannosidase IA [Sus scrofa] >gi|41017248|sp|O02773.1|MA1A1_PIG RecName: Full=Mannosyl-oligosaccharide 1,2-alpha-mannosidase IA; AltName: Full=Man(9)-alpha-mannosidase; Short=Man9-mannosidase; AltName: Full=Mannosid	sp|P07688|CATB_BOVIN	1	1.18104	0.659212	0.71246	0.411076
gi|46396062|sp|Q865F1.1|MTP_PIG RecName: Full=Microsomal triglyceride transfer protein large subunit; Flags: Precursor >gi|47523450|ref|NP_999350.1| microsomal triglyceride transfer protein large subunit precursor [Sus scrofa] >gi|28974486|gb|AAO61497.1| microsomal triglyceride tr	sp|Q8WWA0|ITLN1_HUMAN	1	1.13501	0.61276	0.618694	0.412463
gi|311276865|ref|XP_003135390.1| PREDICTED: 60S ribosomal protein L39-like [Sus scrofa] >gi|335306463|ref|XP_003360477.1| PREDICTED: 60S ribosomal protein L39-like [Sus scrofa] >gi|335284542|ref|XP_003354632.1| PREDICTED: 60S ribosomal protein L39-like [Sus scrofa] >gi|311247842|re	sp|Q9TV13|CASP1_HORSE	1	0.72114	0.454545	0.425325	0.412698
gi|350588020|ref|XP_003357153.2| PREDICTED: protein transport protein Sec31A [Sus scrofa]	sp|Q9TUM0|TRFL_CAMDR	1	1.11939	0.590178	0.772227	0.414056
gi|194043605|ref|XP_001925468.1| PREDICTED: GTP-binding nuclear protein Ran [Sus scrofa]	sp|Q99PA3|BASI_CRIGR	1	1.22235	0.981941	0.667043	0.414221
gi|350592375|ref|XP_001927668.3| PREDICTED: LOW QUALITY PROTEIN: probable ATP-dependent RNA helicase DDX60 [Sus scrofa]	sp|Q5RC84|HEXA_PONAB	1	1.15568	0.808523	1.14148	0.416477
gi|347300163|ref|NP_001231396.1| succinate-semialdehyde dehydrogenase, mitochondrial [Sus scrofa]	sp|Q6NSR8|PEPL1_MOUSE	1	1.15161	0.5	0.869355	0.420968
gi|311264036|ref|XP_003129968.1| PREDICTED: 40S ribosomal protein S25-like isoform 2 [Sus scrofa] >gi|311264034|ref|XP_003129967.1| PREDICTED: 40S ribosomal protein S25-like isoform 1 [Sus scrofa]	sp|Q5R5J1|PCKGC_PONAB	1	0.840845	0.794366	0.407042	0.421127
gi|66793461|ref|NP_001019759.1| UDP-N-acetylglucosamine transporter [Sus scrofa] >gi|62868648|gb|AAY17512.1| UDP-N-acetylglucosamine transporter [Sus scrofa]	sp|Q2HJH2|RAB1B_BOVIN	1	0.587156	0.423038	0.720693	0.422018
gi|48675943|ref|NP_001001640.1| amine oxidase [flavin-containing] A [Sus scrofa] >gi|62899648|sp|Q6Q2J0.1|AOFA_PIG RecName: Full=Amine oxidase [flavin-containing] A; AltName: Full=Monoamine oxidase type A; Short=MAO-A >gi|45551418|gb|AAS68020.1| monoamine oxidase A [Sus scrofa]	sp|Q9Y333|LSM2_HUMAN	1	0.877706	0.679345	0.791106	0.422469
gi|334305778|sp|D2SW95.1|COPB_PIG RecName: Full=Coatomer subunit beta; AltName: Full=Beta-coat protein; Short=Beta-COP >gi|288860138|ref|NP_001165837.1| coatomer subunit beta [Sus scrofa] >gi|268633765|gb|ACZ15983.1| coatomer protein subunit beta 1 [Sus scrofa]	sp|A2VDZ9|VAPB_BOVIN	1	1.17421	0.665766	0.729912	0.423363
gi|298160993|ref|NP_001177169.1| glycerol-3-phosphate dehydrogenase [NAD+], cytoplasmic [Sus scrofa]	sp|Q56H28|ACE2_FELCA	1	1.53494	0.610843	0.546988	0.424096
gi|358009193|gb|AET99218.1| prolyl 4-hydroxylase beta polypeptide [Sus scrofa]	sp|Q9EPB1|DPP2_RAT	1	0.610785	0.412661	0.518171	0.424385
gi|350582717|ref|XP_003125434.3| PREDICTED: rho-associated protein kinase 2, partial [Sus scrofa]	sp|P13752|HA1A_BOVIN	1	0.285291	0.679171	0.452122	0.424482
gi|350593534|ref|XP_003483707.1| PREDICTED: grancalcin-like [Sus scrofa]	sp|P06583|AT1B1_CANFA	1	1.00837	0.575314	0.57113	0.426778
gi|350593820|ref|XP_003483769.1| PREDICTED: isocitrate dehydrogenase [NADP] cytoplasmic isoform 3 [Sus scrofa] >gi|350593816|ref|XP_003483767.1| PREDICTED: isocitrate dehydrogenase [NADP] cytoplasmic isoform 1 [Sus scrofa] >gi|350593818|ref|XP_003483768.1| PREDICTED: isocitrate deh	sp|P32455|GBP1_HUMAN	1	1.46818	0.792045	0.689773	0.427273
gi|321400096|ref|NP_001189469.1| transmembrane emp24 domain-containing protein 7 precursor [Sus scrofa]	sp|Q9UMS4|PRP19_HUMAN	1	0.825032	0.759898	0.555556	0.427842
gi|226533693|ref|NP_001152779.1| bactericidal permeability-increasing protein precursor [Sus scrofa] >gi|225922170|gb|ACO37155.1| bactericidal/permeability increasing protein [Sus scrofa]	sp|P05161|ISG15_HUMAN	1	1.83669	1.37248	1.12304	0.42953
gi|298160936|ref|NP_001177146.1| transmembrane protein C9orf46 [Sus scrofa]	sp|Q8VDC1|FYCO1_MOUSE	1	0.802151	0.92043	0.650538	0.432258
gi|113205892|ref|NP_001038077.1| tubulin beta chain [Sus scrofa] >gi|75045190|sp|Q767L7.1|TBB5_PIG RecName: Full=Tubulin beta chain; AltName: Full=Tubulin beta-5 chain >gi|81174748|gb|ABB58916.1| beta 5-tubulin [Sus scrofa] >gi|41529175|dbj|BAD08435.1| beta 5-tubulin [Sus scrofa]	sp|Q3ZCK9|PSA4_BOVIN	1	1.34174	0.827826	0.773043	0.437391
gi|3913046|sp|O46409.1|APOA4_PIG RecName: Full=Apolipoprotein A-IV; Short=Apo-AIV; Short=ApoA-IV; AltName: Full=Apolipoprotein A4; Flags: Precursor >gi|47523830|ref|NP_999553.1| apolipoprotein A-IV precursor [Sus scrofa] >gi|2695742|emb|CAA11020.1| apolipoprotein A-IV [Sus scrofa]	sp|O46674|AT2A2_CANFA	1	0.447642	0.323741	0.5004	0.438849
gi|51338616|sp|P62831.1|RL23_PIG RecName: Full=60S ribosomal protein L23; AltName: Full=Ribosomal protein L17 >gi|194018720|ref|NP_001123427.1| 60S ribosomal protein L23 [Sus scrofa] >gi|117661026|gb|ABK55650.1| RPL23 [Sus scrofa]	sp|P58776|TPM2_RABIT	1	1.50294	0.744118	0.819118	0.439706
gi|12231040|sp|Q29048.2|VATA_PIG RecName: Full=V-type proton ATPase catalytic subunit A; Short=V-ATPase subunit A; AltName: Full=V-ATPase 69 kDa subunit; AltName: Full=Vacuolar proton pump subunit alpha	sp|Q8CAY6|THIC_MOUSE	1	0.712871	0.717115	0.710042	0.441301
gi|335305925|ref|XP_003135119.2| PREDICTED: LOW QUALITY PROTEIN: ubiquitin-like modifier activating enzyme 1 [Sus scrofa]	sp|P54727|RD23B_HUMAN	1	1.61336	0.863089	0.9069	0.442497
gi|72535208|ref|NP_001026966.1| 2~-5~-oligoadenylate synthase 2 [Sus scrofa] >gi|45594389|gb|AAQ22351.1| 2~-5~ oligoadenylate synthetase 2 [Sus scrofa]	sp|Q58DU5|PSA3_BOVIN	1	0.528398	0.719209	0.63178	0.442884
gi|335303414|ref|XP_001928370.3| PREDICTED: tubulin alpha-4A chain [Sus scrofa]	sp|Q9DAZ9|ZFY19_MOUSE	1	1.07143	0.806723	0.770308	0.445378
gi|350591601|ref|XP_003132498.3| PREDICTED: sodium/potassium-transporting ATPase subunit beta-3-like [Sus scrofa]	sp|Q2TBU5|NT5D1_BOVIN	1	0.623053	0.523364	0.598131	0.445483
gi|335287882|ref|XP_003126232.2| PREDICTED: LOW QUALITY PROTEIN: sterol O-acyltransferase 2-like [Sus scrofa]	sp|Q61107|GBP4_MOUSE	1	0.87253	0.500319	0.57935	0.446144
gi|1706060|sp|P50667.1|COX2_PIG RecName: Full=Cytochrome c oxidase subunit 2; AltName: Full=Cytochrome c oxidase polypeptide II >gi|755272|gb|AAA75622.1| cytochrome c oxidase II, partial (mitochondrion) [Sus scrofa]	sp|P53621|COPA_HUMAN	1	1.50597	0.768496	0.707637	0.446301
gi|335302040|ref|XP_001927564.2| PREDICTED: delta-1-pyrroline-5-carboxylate synthase isoform 1 [Sus scrofa]	sp|Q60415|PEX19_CRIGR	1	1.20612	0.723204	0.817432	0.446408
gi|350578717|ref|XP_003121581.3| PREDICTED: eukaryotic translation initiation factor 3 subunit J-like isoform 1 [Sus scrofa]	sp|Q2KJ32|SBP1_BOVIN	1	0.390193	1.05041	0.651243	0.446823
gi|311271598|ref|XP_001925392.2| PREDICTED: bifunctional 3~-phosphoadenosine 5~-phosphosulfate synthase 2-like [Sus scrofa]	sp|Q6AYL5|SF3B4_RAT	1	1.4104	0.96164	0.888071	0.447189
gi|346986339|ref|NP_001231321.1| small glutamine-rich tetratricopeptide repeat-containing protein alpha [Sus scrofa]	sp|Q9Y5S9|RBM8A_HUMAN	1	0.504562	0.656022	0.494526	0.447993
gi|335310107|ref|XP_003361890.1| PREDICTED: non-POU domain-containing octamer-binding protein [Sus scrofa]	sp|Q5RCF7|NHRF3_PONAB	1	0.801901	0.627376	0.652091	0.448669
gi|2500259|sp|Q95307.2|RL13A_PIG RecName: Full=60S ribosomal protein L13a	sp|P62835|RAP1A_MOUSE	1	0.729252	0.869388	0.813605	0.45034
gi|335295413|ref|XP_003130208.2| PREDICTED: calcium-binding mitochondrial carrier protein Aralar2 [Sus scrofa]	sp|A1A4P5|PFD2_BOVIN	1	1.04151	0.821734	0.858364	0.45177
gi|311259452|ref|XP_003128108.1| PREDICTED: 40S ribosomal protein S8-like [Sus scrofa]	sp|P61286|PABP1_BOVIN	1	0.539959	0.704918	0.730533	0.451844
gi|335285948|ref|XP_003131991.2| PREDICTED: very long-chain specific acyl-CoA dehydrogenase, mitochondrial-like isoform 1 [Sus scrofa]	sp|P80601|UK114_CAPHI	1	0.792191	0.662469	0.644836	0.452141
gi|164669|gb|AAA31120.1| succinyl-CoA synthetase beta-subunit, partial [Sus scrofa]	sp|Q8BL66|EEA1_MOUSE	1	1.17876	0.817699	0.750442	0.453097
gi|350589998|ref|XP_003482972.1| PREDICTED: multidrug resistance-associated protein 4-like, partial [Sus scrofa]	sp|O75356|ENTP5_HUMAN	1	0.795724	0.293943	0.409739	0.453385
gi|343790912|ref|NP_001230514.1| ras-related C3 botulinum toxin substrate 1 (rho family, small GTP binding protein Rac1) [Sus scrofa]	sp|Q28735|TMEDA_RABIT	1	1.13267	0.795292	0.457204	0.454351
gi|51701269|sp|Q95334.1|AMPE_PIG RecName: Full=Glutamyl aminopeptidase; Short=EAP; AltName: Full=Aminopeptidase A; Short=AP-A; AltName: CD_antigen=CD249 >gi|47522856|ref|NP_999182.1| glutamyl aminopeptidase [Sus scrofa] >gi|1518865|gb|AAB07141.1| aminopeptidase A [Sus scrofa]	sp|P52480|KPYM_MOUSE	1	0.889602	1.61617	0.993582	0.454429
gi|47522948|ref|NP_999231.1| D-amino-acid oxidase [Sus scrofa] >gi|129305|sp|P00371.2|OXDA_PIG RecName: Full=D-amino-acid oxidase; Short=DAAO; Short=DAMOX; Short=DAO >gi|164306|gb|AAA30985.1| D-amino acid oxidase [Sus scrofa] >gi|48425898|pdb|1VE9|A Chain A, Porcine Kidney D-Am	sp|Q15436|SC23A_HUMAN	1	0.734694	0.438776	0.38484	0.45481
gi|350593062|ref|XP_003133228.3| PREDICTED: xaa-Pro aminopeptidase 1 isoform 2 [Sus scrofa]	sp|P55859|PNPH_BOVIN	1	1.37736	0.536557	0.553066	0.456368
gi|212549623|ref|NP_001131101.1| endoplasmic reticulum resident protein 44 precursor [Sus scrofa] >gi|187480160|gb|ACD13000.1| thioredoxin domain-containing 4 [Sus scrofa]	sp|A4FUD9|MCM3_BOVIN	1	1.15962	0.594679	0.821596	0.456964
gi|164382|gb|AAA31002.1| Na+, K+-ATPase alpha-subunit precursor [Sus scrofa]	sp|P10854|H2B1M_MOUSE	1	1.0155	0.706612	0.642562	0.457645
gi|350582501|ref|XP_003481284.1| PREDICTED: atlastin-2-like isoform 2 [Sus scrofa]	sp|P0C0S8|H2A1_HUMAN	1	1.03074	0.688525	0.516393	0.457992
gi|335283420|ref|XP_003123942.2| PREDICTED: protein PRRC1-like, partial [Sus scrofa]	sp|Q9CPU0|LGUL_MOUSE	1	1.65495	0.902556	0.591054	0.458466
gi|350593477|ref|XP_003483694.1| PREDICTED: myosin-VIIb [Sus scrofa]	sp|P13796|PLSL_HUMAN	1	1.4089	0.828157	0.910973	0.458592
gi|113205854|ref|NP_001038066.1| 40S ribosomal protein S3 [Sus scrofa] >gi|115502828|sp|Q0Z8U2.1|RS3_PIG RecName: Full=40S ribosomal protein S3 >gi|110006645|gb|ABG48767.1| ribosomal protein S3 [Sus scrofa]	sp|P47942|DPYL2_RAT	1	1.16338	0.575306	0.631187	0.459287
gi|312062805|ref|NP_001185852.1| chloride intracellular channel protein 5 [Sus scrofa] >gi|197361201|gb|ACH70136.1| chloride intracellular channel 5 [Sus scrofa]	sp|Q1JQB2|BUB3_BOVIN	1	1.39905	0.675079	0.624606	0.460568
gi|6174950|sp|P79324.1|RL15_PIG RecName: Full=60S ribosomal protein L15	sp|P61164|ACTZ_MOUSE	1	1.15606	0.87395	0.887155	0.460984
gi|350596281|ref|XP_003361001.2| PREDICTED: voltage-dependent anion-selective channel protein 3-like isoform 2 [Sus scrofa]	sp|Q9JLV1|BAG3_MOUSE	1	0.986864	0.952381	0.756979	0.461412
gi|148747594|ref|NP_001092068.1| 60S acidic ribosomal protein P0 [Sus scrofa] >gi|182705234|sp|Q29214.2|RLA0_PIG RecName: Full=60S acidic ribosomal protein P0; AltName: Full=60S ribosomal protein L10E >gi|83854099|gb|ABC47963.1| ribosomal phosphoprotein large PO subunit [Sus scrofa	sp|P33477|ANX11_RABIT	1	0.81256	0.481159	0.555556	0.461836
gi|194035831|ref|XP_001928742.1| PREDICTED: coatomer subunit alpha isoform 2 [Sus scrofa]	sp|Q80YD1|SUV3_MOUSE	1	1.01062	0.709735	0.683186	0.461947
gi|311260951|ref|XP_003128591.1| PREDICTED: dehydrogenase/reductase SDR family member 1-like [Sus scrofa]	sp|Q91W97|HKDC1_MOUSE	1	0.778622	0.620727	0.670103	0.46229
gi|60394813|sp|Q29201.4|RS16_PIG RecName: Full=40S ribosomal protein S16 >gi|212549659|ref|NP_001131092.1| 40S ribosomal protein S16 [Sus scrofa] >gi|335289675|ref|XP_003355953.1| PREDICTED: 40S ribosomal protein S16-like isoform 2 [Sus scrofa] >gi|335289677|ref|XP_003355954.1| PRE	sp|Q3UMR5|MCU_MOUSE	1	1.25393	0.767416	0.537079	0.462921
gi|311246990|ref|XP_003122442.1| PREDICTED: mucin-2, partial [Sus scrofa]	sp|Q5FVQ4|MLEC_RAT	1	1.08971	0.985294	1.04118	0.463235
gi|47522774|ref|NP_999138.1| heat shock protein HSP 90-alpha [Sus scrofa] >gi|6016267|sp|O02705.3|HS90A_PIG RecName: Full=Heat shock protein HSP 90-alpha >gi|1945447|gb|AAC48718.1| 90-kDa heat shock protein [Sus scrofa]	sp|P68510|1433F_MOUSE	1	0.964161	1.06469	0.924825	0.464161
gi|16033755|gb|AAL13316.1|AF424780_1 cytochrome P450 3A [Sus scrofa]	sp|Q5R556|RAN_PONAB	1	1.2488	0.730007	0.680109	0.466165
gi|3288991|gb|AAC25597.1| fructose-1,6-bisphosphatase [Sus scrofa]	sp|P41035|IF2B_RABIT	1	0.739286	0.654762	0.629762	0.467857
gi|350593858|ref|XP_003133682.3| PREDICTED: carbamoyl-phosphate synthase [ammonia], mitochondrial isoform 1 [Sus scrofa]	sp|Q4R572|1433B_MACFA	1	1.08303	0.611722	0.600733	0.468864
gi|342349319|ref|NP_001230139.1| calnexin precursor [Sus scrofa]	sp|Q9Z0V5|PRDX4_RAT	1	1.02907	1.06783	0.703488	0.468992
gi|52000924|sp|Q29238.2|CLIC1_PIG RecName: Full=Chloride intracellular channel protein 1; AltName: Full=Nuclear chloride ion channel 27	sp|O70493|SNX12_MOUSE	1	1.44006	0.83123	0.59306	0.470032
gi|194038728|ref|XP_001929104.1| PREDICTED: pyruvate kinase isozymes M1/M2 isoform 1 [Sus scrofa]	sp|O15144|ARPC2_HUMAN	1	1.20849	0.629344	0.80695	0.470399
gi|335310941|ref|XP_003362261.1| PREDICTED: 40S ribosomal protein S2-like [Sus scrofa]	sp|P61158|ARP3_HUMAN	1	1.21771	0.95941	0.953875	0.47048
gi|350587407|ref|XP_003482407.1| PREDICTED: hypothetical protein LOC100737378 [Sus scrofa]	sp|P24463|CP3AC_CANFA	1	0.461679	0.499088	0.631387	0.470803
gi|335282386|ref|XP_003354050.1| PREDICTED: elongation factor 2 [Sus scrofa]	sp|Q9GLG2|CAN1_MACFA	1	1.02706	0.685744	0.62435	0.471384
gi|47522800|ref|NP_999152.1| 60S ribosomal protein L22 [Sus scrofa] >gi|54039123|sp|P67985.2|RL22_PIG RecName: Full=60S ribosomal protein L22; AltName: Full=Heparin-binding protein HBp15 >gi|409074|dbj|BAA04547.1| heparin binding protein [Sus scrofa]	sp|Q9BS26|ERP44_HUMAN	1	0.889691	1.24124	0.838144	0.472165
gi|120968|sp|P80147.2|GABT_PIG RecName: Full=4-aminobutyrate aminotransferase, mitochondrial; AltName: Full=(S)-3-amino-2-methylpropionate transaminase; AltName: Full=GABA aminotransferase; Short=GABA-AT; AltName: Full=Gamma-amino-N-butyrate transaminase; Short=GABA transaminase;	sp|A1YFZ3|APEX1_PANPA	1	1.17804	0.705757	0.577825	0.472281
gi|178056560|ref|NP_001116630.1| phosphoenolpyruvate carboxykinase, cytosolic [Sus scrofa] >gi|238863890|gb|ACR66221.1| phosphoenolpyruvate carboxykinase 1 [Sus scrofa] >gi|147223435|emb|CAN13128.1| phosphoenolpyruvate carboxykinase 1 (soluble) [Sus scrofa]	sp|P60900|PSA6_HUMAN	1	1.93397	0.635783	0.758253	0.473908
gi|311254838|ref|XP_001929419.2| PREDICTED: kynurenine--oxoglutarate transaminase 3 isoform 1 [Sus scrofa] >gi|311254836|ref|XP_003125974.1| PREDICTED: kynurenine--oxoglutarate transaminase 3 isoform 2 [Sus scrofa]	sp|P47856|GFPT1_MOUSE	1	0.832895	0.65	0.896053	0.475
gi|346421435|ref|NP_001231091.1| sorbitol dehydrogenase [Sus scrofa]	sp|P04439|1A03_HUMAN	1	0.769606	0.480675	0.46454	0.475422
gi|153792027|ref|NP_001093402.1| phosphoglycerate kinase 1 [Sus scrofa] >gi|56757507|sp|Q7SIB7.3|PGK1_PIG RecName: Full=Phosphoglycerate kinase 1 >gi|50513041|gb|AAT77773.1| phosphoglycerate kinase 1 [Sus scrofa]	sp|Q8VDJ3|VIGLN_MOUSE	1	1.41425	0.772947	0.799517	0.475845
gi|350589164|ref|XP_003357646.2| PREDICTED: acyl-CoA:lysophosphatidylglycerol acyltransferase 1-like [Sus scrofa]	sp|Q5R4E0|MAT2B_PONAB	1	1.01951	0.545122	0.726829	0.476829
gi|311248566|ref|XP_003123198.1| PREDICTED: syntaxin-binding protein 2 [Sus scrofa]	sp|Q9SGH2|MBD9_ARATH	1	1.15491	0.692946	0.829876	0.477178
gi|350583730|ref|XP_003481574.1| PREDICTED: ADP-ribosylation factor GTPase-activating protein 3-like [Sus scrofa]	sp|Q5R668|ACSL3_PONAB	1	0.253758	0.583996	0.262599	0.482759
gi|346716348|ref|NP_001231189.1| arginine--tRNA ligase, cytoplasmic [Sus scrofa]	sp|O94905|ERLN2_HUMAN	1	2.0237	1.34913	0.981043	0.484992
gi|47522760|ref|NP_999131.1| long-chain 3-ketoacyl-CoA thiolase [Sus scrofa] >gi|6165556|gb|AAF04612.1|AF028007_1 long-chain 3-ketoacyl-CoA thiolase [Sus scrofa]	sp|P04187|GRAB_MOUSE	1	1.84239	0.618207	0.72962	0.485054
gi|349732262|ref|NP_001231870.1| 3-hydroxyanthranilate 3,4-dioxygenase [Sus scrofa]	sp|Q60HG9|CPT2_MACFA	1	1.04562	0.722628	0.609489	0.485401
gi|311272935|ref|XP_003133651.1| PREDICTED: NADH-ubiquinone oxidoreductase 75 kDa subunit, mitochondrial isoform 1 [Sus scrofa]	sp|P33672|PSB3_BOVIN	1	0.788793	0.610632	0.625	0.485632
gi|330417958|ref|NP_001155225.1| phosphoenolpyruvate carboxykinase [GTP], mitochondrial [Sus scrofa] >gi|238863892|gb|ACR66222.1| phosphoenolpyruvate carboxykinase 2 [Sus scrofa]	sp|Q00610|CLH1_HUMAN	1	1.21377	0.503587	0.701578	0.48637
gi|113205716|ref|NP_001038033.1| 1,5-anhydro-D-fructose reductase [Sus scrofa] >gi|94421324|gb|ABF18830.1| putative aldo-keto reductase family 1 member CL2 [Sus scrofa]	sp|Q58DR8|SUCA_BOVIN	1	1.27341	0.685801	0.741692	0.487915
gi|311259408|ref|XP_003128090.1| PREDICTED: peroxiredoxin-1 isoform 5 [Sus scrofa]	sp|P17213|BPI_HUMAN	1	0.958261	1.01391	0.736522	0.490435
gi|89573899|gb|ABD77175.1| ribosomal protein L18 [Sus scrofa]	sp|Q7YRK6|CX6B1_TARSY	1	0.806069	0.664908	0.626649	0.492084
gi|194038734|ref|XP_001929226.1| PREDICTED: protein transport protein Sec23A isoform 2 [Sus scrofa]	sp|Q96I15|SCLY_HUMAN	1	1.01871	0.561272	0.689429	0.494855
gi|116175263|ref|NP_001070687.1| ubiquitin-conjugating enzyme E2 J1 [Sus scrofa] >gi|115371729|gb|ABI96189.1| UB2J1 [Sus scrofa]	sp|P11679|K2C8_MOUSE	1	0.66455	0.663492	0.524868	0.496296
gi|47522750|ref|NP_999125.1| voltage-dependent anion-selective channel protein 1 [Sus scrofa] >gi|75050406|sp|Q9MZ16.3|VDAC1_PIG RecName: Full=Voltage-dependent anion-selective channel protein 1; Short=VDAC-1 >gi|8745552|gb|AAF78963.1|AF268461_1 voltage-dependent anion channel	sp|P19015|HBA_HIPAM	1	0.882775	0.714115	0.699761	0.496411
gi|999620|pdb|1MLD|D Chain D, Refined Structure Of Mitochondrial Malate Dehydrogenase From Porcine Heart And The Consensus Structure For Dicarboxylic Acid Oxidoreductases >gi|999618|pdb|1MLD|B Chain B, Refined Structure Of Mitochondrial Malate Dehydrogenase From Porcine	sp|P79105|S10AC_BOVIN	1	1.00831	0.693587	0.709026	0.497625
gi|335290688|ref|XP_003356248.1| PREDICTED: hydroxymethylglutaryl-CoA lyase, mitochondrial-like isoform 1 [Sus scrofa]	sp|P84078|ARF1_MOUSE	1	1.07764	1.00311	0.782609	0.498447
gi|35384836|gb|AAQ84564.1| electron transfer flavoprotein alpha subunit precursor [Sus scrofa]	sp|O46421|EST1_MACFA	1	1.15497	0.746597	0.801047	0.501571
gi|350597032|ref|XP_001925921.4| PREDICTED: aldehyde dehydrogenase family 1 member A3, partial [Sus scrofa]	sp|Q2KIW9|KCY_BOVIN	1	0.527566	1.4207	1.45038	0.50212
gi|51493747|gb|AAU04861.1| enoyl-Coenzyme A hydratase/3-hydroxyacyl Coenzyme A [Sus scrofa]	sp|Q12882|DPYD_HUMAN	1	1.53447	0.875125	0.868132	0.502498
gi|335310868|ref|XP_003362230.1| PREDICTED: T-complex protein 1 subunit epsilon, partial [Sus scrofa]	sp|Q4R8Z2|RL13A_MACFA	1	1.20188	0.930751	0.649061	0.505869
gi|350581964|ref|XP_003124841.3| PREDICTED: constitutive coactivator of PPAR-gamma-like protein 1, partial [Sus scrofa]	sp|P39019|RS19_HUMAN	1	1.08649	0.415997	0.683123	0.509759
gi|311258421|ref|XP_003127605.1| PREDICTED: 6-phosphogluconate dehydrogenase, decarboxylating [Sus scrofa]	sp|Q00438|PTBP1_RAT	1	1.53395	0.903292	0.828189	0.512346
gi|65987|pir||DEPGG3 glyceraldehyde-3-phosphate dehydrogenase (phosphorylating) (EC 1.2.1.12) - pig	sp|A6M931|IF4A3_PIG	1	4.56604	1.41509	1.09623	0.513208
gi|346421343|ref|NP_001231035.1| ribosomal protein S10 [Sus scrofa]	sp|P12830|CADH1_HUMAN	1	0.902804	0.840498	0.778816	0.514019
gi|346986388|ref|NP_001231345.1| profilin-1 [Sus scrofa]	sp|P60662|MYL6_PIG	1	1.25625	0.85125	0.80125	0.515
gi|194043292|ref|XP_001928111.1| PREDICTED: 14-3-3 protein eta [Sus scrofa]	sp|Q9N1U7|OTC_BOVIN	1	1.87191	1.21689	0.892285	0.518195
gi|194036322|ref|XP_001928206.1| PREDICTED: Na(+)/H(+) exchange regulatory cofactor NHE-RF3 isoform 1 [Sus scrofa] >gi|194036324|ref|XP_001928212.1| PREDICTED: Na(+)/H(+) exchange regulatory cofactor NHE-RF3 isoform 2 [Sus scrofa]	sp|O62768|TRXR1_BOVIN	1	0.962871	1.19926	0.731436	0.518564
gi|350585375|ref|XP_003127408.3| PREDICTED: myosin-14 [Sus scrofa]	sp|O75940|SPF30_HUMAN	1	1.00084	0.646321	0.885452	0.519231
gi|347300398|ref|NP_001231491.1| core histone macro-H2A.1 isoform 1 [Sus scrofa]	sp|Q4R5G7|DHB12_MACFA	1	0.492027	0.353075	0.553531	0.519362
gi|346716265|ref|NP_001231271.1| omega-amidase NIT2 [Sus scrofa]	sp|Q99MZ7|PECR_MOUSE	1	0.887686	0.783491	0.558863	0.519621
gi|311275457|ref|XP_003134747.1| PREDICTED: filamin-C isoform 1 [Sus scrofa]	sp|Q5RES5|THIM_PONAB	1	1.13651	1.21875	1.10362	0.521382
gi|350595461|ref|XP_003134939.3| PREDICTED: LOW QUALITY PROTEIN: 2-oxoglutarate dehydrogenase, mitochondrial-like [Sus scrofa]	sp|Q5R7D8|DCTN6_PONAB	1	1.10719	0.688889	0.763399	0.522876
gi|347543763|ref|NP_001231548.1| calmodulin-like 4 [Sus scrofa]	sp|Q9CR21|ACPM_MOUSE	1	0.521257	0.456562	0.34658	0.52403
gi|335299760|ref|XP_003358667.1| PREDICTED: neprilysin isoform 2 [Sus scrofa] >gi|311269573|ref|XP_003132549.1| PREDICTED: neprilysin isoform 1 [Sus scrofa]	sp|P33261|CP2CJ_HUMAN	1	0.822485	0.971598	0.835503	0.52426
gi|190360593|ref|NP_001121945.1| interferon-induced guanylate-binding protein 1 [Sus scrofa] >gi|166202346|gb|ABY84597.1| guanylate binding protein 1 [Sus scrofa]	sp|Q9N0J6|F16P2_RABIT	1	1.47826	0.883632	0.994885	0.524297
gi|54020966|ref|NP_001005726.1| annexin A2 [Sus scrofa] >gi|148876771|sp|P19620.4|ANXA2_PIG RecName: Full=Annexin A2; AltName: Full=Annexin II; AltName: Full=Annexin-2; AltName: Full=Calpactin I heavy chain; AltName: Full=Calpactin-1 heavy chain; AltName: Full=Chromobindin-8; AltN	sp|Q4R6F8|TCPB_MACFA	1	1.16744	0.822387	0.659574	0.524514
gi|345199333|ref|NP_001230853.1| SEC24 family, member A [Sus scrofa]	sp|P56470|LEG4_HUMAN	1	1.12258	0.637419	0.732903	0.525161
gi|40889737|pdb|1UDY|D Chain D, Medium-Chain Acyl-Coa Dehydrogenase With 3-Thiaoctanoyl-Coa >gi|40889735|pdb|1UDY|B Chain B, Medium-Chain Acyl-Coa Dehydrogenase With 3-Thiaoctanoyl-Coa >gi|40889736|pdb|1UDY|C Chain C, Medium-Chain Acyl-Coa Dehydrogenase With 3-Thiaoctanoy	sp|Q5R616|DHSA_PONAB	1	0.793558	0.61347	0.585652	0.527086
gi|311270046|ref|XP_003132745.1| PREDICTED: 60S ribosomal protein L24-like isoform 1 [Sus scrofa]	sp|P51569|AGAL_MOUSE	1	0.750932	0.797166	0.52349	0.527218
gi|195562223|gb|ACG50182.1| actin related protein 2/3 complex subunit 2 [Sus scrofa]	sp|Q9QXT0|CNPY2_MOUSE	1	0.967413	0.898167	0.535642	0.527495
gi|1702996|sp|P54612.2|2AAA_PIG RecName: Full=Serine/threonine-protein phosphatase 2A 65 kDa regulatory subunit A alpha isoform; AltName: Full=PP2A subunit A isoform PR65-alpha; AltName: Full=PP2A subunit A isoform R1-alpha >gi|47522870|ref|NP_999189.1| serine/threonine-protein ph	sp|P43487|RANG_HUMAN	1	1.04578	0.749551	0.728007	0.528725
gi|350591696|ref|XP_003483317.1| PREDICTED: sucrase-isomaltase, intestinal-like [Sus scrofa]	sp|Q8WMY2|FPPS_BOVIN	1	1.01596	0.913926	0.760155	0.529014
gi|350579626|ref|XP_003122205.3| PREDICTED: spermatid perinuclear RNA-binding protein-like [Sus scrofa]	sp|P09960|LKHA4_HUMAN	1	1.22144	1.03244	0.867419	0.533145
gi|335302965|ref|XP_001925033.2| PREDICTED: lupus La protein homolog [Sus scrofa]	sp|P68036|UB2L3_HUMAN	1	1.57967	1.19824	1.05897	0.53325
gi|213958609|gb|ACJ54701.1| glutamine:fructose-6-phosphate amidotransferase 1 variant 2 [Sus scrofa]	sp|P04181|OAT_HUMAN	1	1.64164	0.705987	0.693476	0.535299
gi|346644874|ref|NP_001231109.1| T-complex protein 1 subunit gamma [Sus scrofa]	sp|P84090|ERH_HUMAN	1	1.61314	1.05109	0.981022	0.537226
gi|227336237|gb|ACP20834.1| selenocysteine lyase [Sus scrofa]	sp|A6QLP7|SSRA_BOVIN	1	1.76734	0.759872	0.608324	0.542156
gi|311252952|ref|XP_003125350.1| PREDICTED: ketohexokinase-like isoform 3 [Sus scrofa]	sp|Q03958|PFD6_MOUSE	1	0.847144	0.563047	0.720021	0.54246
gi|350591605|ref|XP_003483304.1| PREDICTED: plastin-1-like [Sus scrofa]	sp|Q9ULA0|DNPEP_HUMAN	1	0.854909	0.604692	0.58384	0.543875
gi|58801555|ref|NP_001011727.1| adenosylhomocysteinase [Sus scrofa] >gi|61216107|sp|Q710C4.3|SAHH_PIG RecName: Full=Adenosylhomocysteinase; Short=AdoHcyase; AltName: Full=S-adenosyl-L-homocysteine hydrolase >gi|40644231|emb|CAD20603.1| S-adenosylhomocysteine hydrolase [Sus scrofa]	sp|Q5RC24|QCR7_PONAB	1	1.37581	0.74406	0.62959	0.544276
gi|311270318|ref|XP_001925732.2| PREDICTED: zinc transporter ZIP14 [Sus scrofa]	sp|Q8K019|BCLF1_MOUSE	1	1.05602	0.64834	0.626556	0.54668
gi|343790893|ref|NP_001230504.1| creatine kinase, brain [Sus scrofa]	sp|P62627|DLRB1_MOUSE	1	1.23906	0.61648	0.660224	0.547304
gi|113205888|ref|NP_001038076.1| aldehyde dehydrogenase, mitochondrial precursor [Sus scrofa] >gi|122138098|sp|Q2XQV4.1|ALDH2_PIG RecName: Full=Aldehyde dehydrogenase, mitochondrial; AltName: Full=ALDH class 2; AltName: Full=ALDH-E2; Flags: Precursor >gi|81295909|gb|ABB70228.1| mit	sp|Q96HY6|DDRGK_HUMAN	1	1.28645	0.794168	0.785592	0.548885
gi|311268663|ref|XP_003132151.1| PREDICTED: 3-ketoacyl-CoA thiolase A, peroxisomal isoform 1 [Sus scrofa]	sp|Q9HBL7|PLRKT_HUMAN	1	1.12893	0.580715	0.605634	0.549296
gi|297591965|ref|NP_001172061.1| leukotriene A-4 hydrolase [Sus scrofa] >gi|262204898|dbj|BAI48029.1| leukotriene A4 hydrolase [Sus scrofa]	sp|P61457|PHS_HUMAN	1	1.41601	1.0575	0.88726	0.550169
gi|984249|emb|CAA62352.1| protein kinase [Sus scrofa]	sp|P13707|GPDA_MOUSE	1	1.36571	0.940819	0.790592	0.550835
gi|2497487|sp|Q29561.1|KCY_PIG RecName: Full=UMP-CMP kinase; AltName: Full=Cytidine monophosphate kinase; AltName: Full=Cytidylate kinase; AltName: Full=Deoxycytidylate kinase; AltName: Full=Uridine monophosphate kinase; AltName: Full=Uridine monophosphate/cytidine monophosphate	sp|P46195|KGUA_BOVIN	1	0.769802	0.693894	0.485149	0.55363
gi|85542092|sp|Q2YGT9.3|RL6_PIG RecName: Full=60S ribosomal protein L6 >gi|113205608|ref|NP_001038007.1| 60S ribosomal protein L6 [Sus scrofa] >gi|56384243|gb|AAV85770.1| ribosomal protein L6 [Sus scrofa]	sp|Q922R8|PDIA6_MOUSE	1	1.45891	0.592	0.520727	0.554182
gi|45268975|gb|AAS55900.1| 60S ribosomal protein L11, partial [Sus scrofa]	sp|Q02790|FKBP4_HUMAN	1	1.16087	1.07114	1.0671	0.555376
gi|113205898|ref|NP_001038078.1| microtubule-associated protein RP/EB family member 1 [Sus scrofa] >gi|81174752|gb|ABB58918.1| microtubule-associated protein RP/EB family member 1 [Sus scrofa]	sp|Q5ZL34|CPSF6_CHICK	1	1.74904	1.28425	0.988476	0.558259
gi|387912908|sp|P28491.3|CALR_PIG RecName: Full=Calreticulin; AltName: Full=CRP55; AltName: Full=Calregulin; AltName: Full=Endoplasmic reticulum resident protein 60; Short=ERp60; AltName: Full=HACBP; Flags: Precursor >gi|291622246|ref|NP_001167604.1| calreticulin precursor [Sus scro	sp|A7MBI7|COMT_BOVIN	1	0.861069	0.845802	0.919084	0.560305
gi|335292737|ref|XP_001927469.2| PREDICTED: serine/arginine-rich splicing factor 5 isoform 2 [Sus scrofa] >gi|335292735|ref|XP_001927454.2| PREDICTED: serine/arginine-rich splicing factor 5 isoform 1 [Sus scrofa]	sp|Q6YN16|HSDL2_HUMAN	1	0.487245	1.2568	0.739796	0.560374
gi|335280113|ref|XP_003121789.2| PREDICTED: LOW QUALITY PROTEIN: 60S ribosomal protein L4 [Sus scrofa]	sp|Q8TDZ2|MICA1_HUMAN	1	0.912365	0.794718	0.812725	0.560624
gi|335308509|ref|XP_003361258.1| PREDICTED: microsomal glutathione S-transferase 2-like, partial [Sus scrofa]	sp|Q9TTK8|KCRU_BOVIN	1	0.826027	0.628767	0.591781	0.560959
gi|335310645|ref|XP_003362128.1| PREDICTED: N-acetylglucosamine-6-sulfatase-like, partial [Sus scrofa]	sp|Q148V7|K1468_MOUSE	1	1.30702	1.02193	0.758772	0.561404
gi|350587855|ref|XP_003129278.3| PREDICTED: protein transport protein Sec24D [Sus scrofa]	sp|P62754|RS6_MOUSE	1	0.799594	0.419093	0.631009	0.563981
gi|311273061|ref|XP_001925202.2| PREDICTED: villin 1 [Sus scrofa]	sp|Q5RDZ0|KAD3_PONAB	1	1.09934	0.780568	0.977074	0.56441
gi|319401911|ref|NP_001188310.1| adenosylhomocysteinase-like protein 1 [Sus scrofa] >gi|315321422|gb|ADU04838.1| adenosylhomocysteinase-like protein 1 [Sus scrofa]	sp|Q32LP9|COR2A_BOVIN	1	1.04313	1.12668	0.924528	0.566038
gi|262204920|dbj|BAI48040.1| peroxisomal trans-2-enoyl-CoA reductase [Sus scrofa]	sp|Q5R4B4|HDHD2_PONAB	1	1.68535	0.541233	0.622098	0.566053
gi|153792600|ref|NP_001093400.1| fatty acid synthase [Sus scrofa] >gi|148733529|gb|ABR09275.1| fatty acid synthase [Sus scrofa]	sp|Q80Z19|MUC2_MOUSE	1	1.32384	0.958861	1.30802	0.56962
gi|270047494|ref|NP_001161104.2| fructose-1,6-bisphosphatase isozyme 2 [Sus scrofa]	sp|Q9H6S3|ES8L2_HUMAN	1	1.05449	0.838675	0.637821	0.570513
gi|194042189|ref|XP_001924213.1| PREDICTED: annexin A11 [Sus scrofa]	sp|Q8VHF2|CDHR5_MOUSE	1	1.15254	0.901695	0.87661	0.572881
gi|335287713|ref|XP_003355423.1| PREDICTED: tubulin alpha-1C chain isoform 1 [Sus scrofa]	sp|Q8HXQ9|NDUV1_MACFA	1	1.38085	0.614468	0.627234	0.573617
gi|125151|sp|P00571.1|KAD1_PIG RecName: Full=Adenylate kinase isoenzyme 1; Short=AK 1; AltName: Full=ATP-AMP transphosphorylase 1; AltName: Full=Myokinase >gi|350579686|ref|XP_003122225.3| PREDICTED: adenylate kinase isoenzyme 1 isoform 1 [Sus scrofa] >gi|229498|prf||742496A kina	sp|Q9UUI3|SA145_SCHPO	1	2.07162	0.702413	1.00268	0.574493
gi|350587231|ref|XP_003482373.1| PREDICTED: LOW QUALITY PROTEIN: cytoplasmic dynein 1 heavy chain 1 [Sus scrofa]	sp|O54697|NALDL_RAT	1	1.35922	0.702265	0.846818	0.574973
gi|72535168|ref|NP_001026948.1| perilipin-3 [Sus scrofa] >gi|68565356|sp|Q5BLZ2.1|PLIN3_PIG RecName: Full=Perilipin-3; AltName: Full=Cargo selection protein TIP47; AltName: Full=Mannose-6-phosphate receptor-binding protein 1 >gi|60651141|gb|AAX31659.1| TIP47 [Sus scrofa]	sp|Q3ZBC2|SDHF2_BOVIN	1	1.30752	0.976082	0.872437	0.575171
gi|304365440|ref|NP_001182048.1| protein disulfide-isomerase A6 precursor [Sus scrofa] >gi|301016767|dbj|BAJ11758.1| protein disulfide isomerase P5 [Sus scrofa]	sp|Q3LXA3|DHAK_HUMAN	1	1.35612	1.23043	1.16759	0.575524
gi|194044992|ref|XP_001928105.1| PREDICTED: sorting nexin-12 [Sus scrofa]	sp|O00330|ODPX_HUMAN	1	0.892759	0.627864	0.603116	0.575619
gi|346986322|ref|NP_001231315.1| peptidyl-prolyl cis-trans isomerase D [Sus scrofa]	sp|Q96GX9|MTNB_HUMAN	1	1.157	1.07488	0.942029	0.577295
gi|335310931|ref|XP_003362256.1| PREDICTED: vacuolar protein sorting-associated protein 35 [Sus scrofa]	sp|Q3T0X5|PSA1_BOVIN	1	1	0.837868	0.840136	0.578231
gi|84028320|sp|Q9GKX6.1|GALM_PIG RecName: Full=Aldose 1-epimerase; AltName: Full=Galactose mutarotase >gi|47523866|ref|NP_999571.1| aldose 1-epimerase [Sus scrofa] >gi|11611545|dbj|BAB18973.1| aldose 1-epimerase [Sus scrofa]	sp|P30049|ATPD_HUMAN	1	1.86202	1.03841	1.17354	0.578947
gi|311252547|ref|XP_003125148.1| PREDICTED: T-complex protein 1 subunit delta-like [Sus scrofa]	sp|Q64324|STXB2_MOUSE	1	1.137	0.861827	0.962529	0.579625
gi|335296519|ref|XP_003357800.1| PREDICTED: ras-related protein Rab-18-like [Sus scrofa]	sp|Q29451|MA2B1_BOVIN	1	1.08188	0.873826	0.715436	0.581208
gi|47522786|ref|NP_999145.1| UTP--glucose-1-phosphate uridylyltransferase [Sus scrofa] >gi|6136110|sp|P79303.3|UGPA_PIG RecName: Full=UTP--glucose-1-phosphate uridylyltransferase; AltName: Full=UDP-glucose pyrophosphorylase; Short=UDPGP; Short=UGPase >gi|1752677|emb|CAA67690.1|	sp|Q5XJW2|G45IP_RAT	1	1.29467	0.870907	1.03368	0.582788
gi|311247536|ref|XP_003122689.1| PREDICTED: bifunctional ATP-dependent dihydroxyacetone kinase/FAD-AMP lyase (cyclizing)-like [Sus scrofa]	sp|Q8NBJ5|GT251_HUMAN	1	1.91383	0.934106	0.879797	0.582911
gi|130759|sp|P23687.1|PPCE_PIG RecName: Full=Prolyl endopeptidase; Short=PE; AltName: Full=Post-proline cleaving enzyme >gi|51592147|ref|NP_001004050.1| prolyl endopeptidase [Sus scrofa] >gi|387766256|pdb|4AN1|A Chain A, Prolyl Oligopeptidase From Porcine Brain With A Covalently	sp|Q60445|COPE_CRIGR	1	1.38578	1.1153	1.13685	0.582974
gi|335299814|ref|XP_003358691.1| PREDICTED: elongation factor G, mitochondrial-like [Sus scrofa]	sp|Q12907|LMAN2_HUMAN	1	0.796316	0.64572	0.801733	0.587216
gi|350579589|ref|XP_003353682.2| PREDICTED: erythrocyte band 7 integral membrane protein-like [Sus scrofa]	sp|Q2HJD0|FAF2_BOVIN	1	0.97497	0.744934	0.902265	0.588796
gi|346986428|ref|NP_001231362.1| heat shock 90kD protein 1, beta [Sus scrofa]	sp|A6QLY4|ISOC1_BOVIN	1	1.05938	1.0568	0.987091	0.589501
gi|342187276|ref|NP_001230112.1| AP-2 complex subunit beta [Sus scrofa]	sp|Q5RDM4|HSP74_PONAB	1	1.54733	0.860082	1.77092	0.589849
gi|17432930|sp|Q9N2I1.1|CASP1_PIG RecName: Full=Caspase-1; Short=CASP-1; AltName: Full=Interleukin-1 beta convertase; Short=IL-1BC; AltName: Full=Interleukin-1 beta-converting enzyme; Short=ICE; Short=IL-1 beta-converting enzyme; AltName: Full=p45; Contains: RecName: Full=Caspase-1	sp|Q5R511|GRP75_PONAB	1	1.09061	0.516721	0.866235	0.590076
gi|299728|gb|AAB26300.1| guanylate kinase, ATP:GMP-phospho-transferase {EC 2.7.4.8} [swine, brain, Peptide, 197 aa]	sp|Q4R5A5|TAF7_MACFA	1	2.21059	1.10593	1.01009	0.595208
gi|346421386|ref|NP_001231066.1| ATP synthase subunit g, mitochondrial [Sus scrofa]	sp|Q3B8N7|T22D4_RAT	1	1.60474	1.08564	1.00922	0.59552
gi|319401915|ref|NP_001188313.1| rho GDP-dissociation inhibitor 1 [Sus scrofa] >gi|315321426|gb|ADU04840.1| Rho GDP dissociation inhibitor alpha [Sus scrofa]	sp|P85834|EFTU_RAT	1	1.24321	0.739819	0.651584	0.596154
gi|335280672|ref|XP_003353634.1| PREDICTED: aldehyde dehydrogenase X, mitochondrial [Sus scrofa]	sp|Q9H5N1|RABE2_HUMAN	1	0.915976	0.609467	0.773964	0.59645
gi|350592477|ref|XP_003483474.1| PREDICTED: vacuolar protein sorting-associated protein 29-like isoform 1 [Sus scrofa]	sp|Q5RCX5|FAHD2_PONAB	1	1.23373	1.10843	0.715663	0.59759
gi|311252948|ref|XP_003125347.1| PREDICTED: cell growth regulator with EF hand domain protein 1-like isoform 2 [Sus scrofa]	sp|Q64FG0|RETST_MACFA	1	0.560235	0.480575	0.583415	0.598433
gi|45269041|gb|AAS55933.1| 40S ribosomal protein S3a, partial [Sus scrofa]	sp|P62308|RUXG_HUMAN	1	1.6333	0.690503	1.78719	0.601259
gi|335297787|ref|XP_003131575.2| PREDICTED: puromycin-sensitive aminopeptidase isoform 1 [Sus scrofa]	sp|P50991|TCPD_HUMAN	1	0.911854	0.869301	0.642857	0.601824
gi|462384|sp|P33198.1|IDHP_PIG RecName: Full=Isocitrate dehydrogenase [NADP], mitochondrial; Short=IDH; AltName: Full=ICD-M; AltName: Full=IDP; AltName: Full=NADP(+)-specific ICDH; AltName: Full=Oxalosuccinate decarboxylase; Flags: Precursor >gi|294223|gb|AAA31089.1| NADPH-specif	sp|Q16629|SRSF7_HUMAN	1	1.51117	0.988827	0.994413	0.601955
gi|335296662|ref|XP_003130891.2| PREDICTED: 6-phosphofructokinase type C [Sus scrofa]	sp|P97586|CGRE1_RAT	1	1.67515	0.766001	1.01927	0.602202
gi|345110630|ref|NP_001230796.1| RuvB-like 2 [Sus scrofa]	sp|Q02974|KHK_RAT	1	0.901444	1.18012	1.4452	0.603229
gi|356582293|ref|NP_001239141.1| DEAH (Asp-Glu-Ala-His) box polypeptide 15 [Sus scrofa]	sp|Q8QZR5|ALAT1_MOUSE	1	1.05428	0.966597	0.727557	0.605428
gi|147899784|ref|NP_001090887.1| elongation factor 1-alpha 1 [Sus scrofa] >gi|223019599|emb|CAX36487.1| eukaryotic translation elongation factor 1 alpha 1 [Sus scrofa] >gi|223019597|emb|CAX36486.1| eukaryotic translation elongation factor 1 alpha 1 [Sus scrofa] >gi|110287842|gb|ABG	sp|P61272|RL35A_MACFA	1	1.175	1.0569	0.783621	0.606034
gi|311262396|ref|XP_003129144.1| PREDICTED: septin-11 [Sus scrofa]	sp|Q4R4X6|RAB2A_MACFA	1	0.957707	0.931391	0.806391	0.606203
gi|335294978|ref|XP_003357366.1| PREDICTED: coatomer subunit delta isoform 1 [Sus scrofa]	sp|Q6TA48|MPTX_RAT	1	0.970027	0.633515	0.581744	0.606267
gi|305855180|ref|NP_001182259.1| catechol O-methyltransferase [Sus scrofa] >gi|285818436|gb|ADC38891.1| catechol-O-methyltransferase [Sus scrofa]	sp|Q9CXY6|ILF2_MOUSE	1	1.99237	0.703704	0.723312	0.606754
gi|335308413|ref|XP_003361222.1| PREDICTED: beta-galactosidase-like, partial [Sus scrofa]	sp|Q9P2M7|CING_HUMAN	1	1.16197	0.830986	0.948357	0.607981
gi|349585085|ref|NP_001231804.1| RAB11B, member RAS oncogene family [Sus scrofa]	sp|Q5TBC7|B2L15_HUMAN	1	1.16769	0.869033	0.703794	0.613219
gi|312283580|ref|NP_999292.2| superoxide dismutase [Mn], mitochondrial [Sus scrofa]	sp|Q91WL0|ES8L3_MOUSE	1	1.02975	1.71074	1.8281	0.614876
gi|311260144|ref|XP_003128362.1| PREDICTED: butyrophilin subfamily 1 member A1-like [Sus scrofa]	sp|Q6YP21|KAT3_HUMAN	1	1.1781	0.699208	0.824538	0.616095
gi|194039884|ref|XP_001928592.1| PREDICTED: histone H2A type 1-like [Sus scrofa]	sp|O75600|KBL_HUMAN	1	0.541353	0.646617	0.5	0.616541
gi|335284301|ref|XP_003354567.1| PREDICTED: T-complex protein 1 subunit zeta-like isoform 2 [Sus scrofa]	sp|Q5XKE5|K2C79_HUMAN	1	1.24559	0.723568	0.90859	0.61674
gi|346421398|ref|NP_001231071.1| sorcin isoform 1 [Sus scrofa]	sp|Q61686|CBX5_MOUSE	1	0.726328	0.639723	0.557737	0.618938
gi|335281857|ref|XP_003122760.2| PREDICTED: catenin delta-1 [Sus scrofa]	sp|A7MBJ5|CAND1_BOVIN	1	1.18496	0.714092	0.859756	0.619241
gi|268370269|ref|NP_001161307.1| cytochrome P450 2C42 precursor [Sus scrofa]	sp|O60884|DNJA2_HUMAN	1	2.50355	0.887441	1.34123	0.619668
gi|47523888|ref|NP_999583.1| ADP/ATP translocase 3 [Sus scrofa] >gi|52000613|sp|Q6QRN9.3|ADT3_PIG RecName: Full=ADP/ATP translocase 3; AltName: Full=ADP,ATP carrier protein 3; AltName: Full=Adenine nucleotide translocator 3; Short=ANT 3; AltName: Full=Solute carrier family 25 m	sp|Q5NVN7|SAE1_PONAB	1	1.10771	0.74868	0.728617	0.619852
gi|311254554|ref|XP_003125887.1| PREDICTED: bcl-2-like protein 15-like [Sus scrofa]	sp|P17426|AP2A1_MOUSE	1	1.80386	1.05349	1.10401	0.6211
gi|335310331|ref|XP_003361983.1| PREDICTED: poly(U)-binding-splicing factor PUF60-like [Sus scrofa]	sp|Q63618|ESPN_RAT	1	1.12893	0.669556	0.83532	0.622969
gi|47523792|ref|NP_999532.1| catenin beta-1 [Sus scrofa] >gi|167834655|gb|ACA03158.1| beta-catenin [Sus scrofa] >gi|18146999|dbj|BAB82984.1| beta-catenin [Sus scrofa]	sp|Q9DCD0|6PGD_MOUSE	1	0.981702	0.706313	0.564959	0.623056
gi|116047849|gb|ABJ53147.1| glutathione S-transferase mu 2 [Sus scrofa]	sp|A2ADY9|DDI2_MOUSE	1	1.28552	0.864903	1.00975	0.623955
gi|1921|emb|CAA33169.1| unnamed protein product [Sus scrofa]	sp|P58242|ASM3B_MOUSE	1	1.77563	1.33656	1.01547	0.624758
gi|225735709|ref|NP_001139599.1| clathrin heavy chain 1 [Sus scrofa] >gi|224492556|emb|CAR65329.1| clathrin heavy chain [Sus scrofa]	sp|O14950|ML12B_HUMAN	1	1.38147	0.683514	0.799037	0.628159
gi|335306989|ref|XP_003130411.2| PREDICTED: ATP-dependent RNA helicase A-like [Sus scrofa]	sp|Q4R5F6|SMD1_MACFA	1	1.00192	0.857829	1.11431	0.632085
gi|80971504|ref|NP_001032223.1| 40S ribosomal protein SA [Sus scrofa] >gi|122069666|sp|Q4GWZ2.3|RSSA_PIG RecName: Full=40S ribosomal protein SA; AltName: Full=37 kDa laminin receptor precursor; Short=37LRP; AltName: Full=37/67 kDa laminin receptor; Short=LRP/LR; AltName: Full=67 k	sp|Q61847|MEP1B_MOUSE	1	0.94362	0.61543	0.630861	0.632641
gi|350584106|ref|XP_003481667.1| PREDICTED: SWI/SNF complex subunit SMARCC2 [Sus scrofa]	sp|Q91WJ8|FUBP1_MOUSE	1	1.08243	0.812789	0.734977	0.633282
gi|194042794|ref|XP_001925861.1| PREDICTED: calcium uniporter protein, mitochondrial [Sus scrofa]	sp|Q9CY58|PAIRB_MOUSE	1	0.784993	0.937951	0.743146	0.633478
gi|335309657|ref|XP_003361720.1| PREDICTED: 14-3-3 protein epsilon-like [Sus scrofa]	sp|P07919|QCR6_HUMAN	1	1.51535	1.34649	0.932018	0.633772
gi|171986635|gb|ACB59309.1| intelectin 2 [Sus scrofa]	sp|Q06830|PRDX1_HUMAN	1	3.01494	0.898386	1.94023	0.635386
gi|350582932|ref|XP_003125549.2| PREDICTED: annexin A13 isoform 2 [Sus scrofa]	sp|P62242|RS8_MOUSE	1	1.01133	1.25405	1.05502	0.635922
gi|148237564|ref|NP_001090977.1| adenylosuccinate synthetase isozyme 2 [Sus scrofa] >gi|189031715|sp|A4Z6H1.1|PURA2_PIG RecName: Full=Adenylosuccinate synthetase isozyme 2; Short=AMPSase 2; Short=AdSS 2; AltName: Full=Adenylosuccinate synthetase, acidic isozyme; AltName: Full=Adeny	sp|Q8R1F5|HYI_MOUSE	1	1.16792	1.24543	0.884822	0.636168
gi|335304194|ref|XP_003134175.2| PREDICTED: LOW QUALITY PROTEIN: protein FAM114A2-like [Sus scrofa]	sp|E9Q557|DESP_MOUSE	1	0.57961	0.528005	0.612964	0.636249
gi|335300686|ref|XP_003358992.1| PREDICTED: carbonyl reductase [NADPH] 1-like [Sus scrofa]	sp|Q6EDY6|LR16A_MOUSE	1	0.95283	0.787736	0.85967	0.636792
gi|350592835|ref|XP_003483550.1| PREDICTED: protein transport protein Sec24C isoform 2 [Sus scrofa]	sp|P18892|BT1A1_BOVIN	1	1.68834	1.36533	0.908153	0.638803
gi|311249593|ref|XP_003123724.1| PREDICTED: vesicular integral-membrane protein VIP36 [Sus scrofa]	sp|P36371|TAP2_MOUSE	1	1.3626	0.573984	0.795122	0.639024
gi|335289608|ref|XP_003355931.1| PREDICTED: alpha-actinin-4-like isoform 2 [Sus scrofa]	sp|Q9CQ89|CUTA_MOUSE	1	0.869762	0.577576	0.568516	0.640997
gi|56711362|ref|NP_001008689.1| GTP-binding protein SAR1b [Sus scrofa] >gi|75061519|sp|Q5PYH3.1|SAR1B_PIG RecName: Full=GTP-binding protein SAR1b >gi|55977172|gb|AAV68380.1| Sar1b protein [Sus scrofa]	sp|Q8WVM8|SCFD1_HUMAN	1	1.31201	0.741514	0.926893	0.642298
gi|359807141|ref|NP_001240850.1| mannose-6-phosphate isomerase [Sus scrofa]	sp|Q96LJ7|DHRS1_HUMAN	1	1.71635	0.674385	1.11288	0.643994
gi|350585922|ref|XP_003127872.3| PREDICTED: adenylyl cyclase-associated protein 1, partial [Sus scrofa]	sp|P29595|NEDD8_MOUSE	1	1.117	1.40585	0.996344	0.645338
gi|305855148|ref|NP_001182266.1| peptidyl-prolyl cis-trans isomerase FKBP4 [Sus scrofa] >gi|285818414|gb|ADC38880.1| FK506 binding protein 4 [Sus scrofa]	sp|Q5RFI8|PGM2_PONAB	1	0.910029	0.948378	1.17404	0.646018
gi|48675935|ref|NP_001001636.1| 60S ribosomal protein L32 [Sus scrofa] >gi|51701704|sp|Q6QAT0.3|RL32_PIG RecName: Full=60S ribosomal protein L32 >gi|45268969|gb|AAS55897.1| 60S ribosomal protein L32 [Sus scrofa]	sp|Q9D281|NXP20_MOUSE	1	1.39939	0.79878	0.71189	0.646341
gi|164318|gb|AAA30988.1| albumin, partial [Sus scrofa]	sp|Q8TDQ7|GNPI2_HUMAN	1	0.972689	0.665966	0.619748	0.647059
gi|335284501|ref|XP_003124603.2| PREDICTED: cytochrome b-c1 complex subunit 2, mitochondrial-like [Sus scrofa]	sp|Q2KIG0|ETFD_BOVIN	1	0.945444	0.655793	0.866142	0.648481
gi|311247118|ref|XP_003122486.1| PREDICTED: NADH dehydrogenase [ubiquinone] flavoprotein 1, mitochondrial-like isoform 1 [Sus scrofa]	sp|P33731|SRP72_CANFA	1	1.31376	0.942953	0.958054	0.649329
gi|90200404|gb|ABD92704.1| triosephosphate isomerase 1 [Sus scrofa]	sp|A2VE99|SEP11_BOVIN	1	1.28158	0.843683	0.884368	0.650964
gi|335287403|ref|XP_001927013.3| PREDICTED: calcium-activated chloride channel regulator 4 [Sus scrofa]	sp|P53634|CATC_HUMAN	1	1.07214	0.614872	0.861265	0.651498
gi|47522662|ref|NP_999076.1| membrane-associated progesterone receptor component 1 [Sus scrofa] >gi|6647580|sp|Q95250.3|PGRC1_PIG RecName: Full=Membrane-associated progesterone receptor component 1 >gi|1657409|emb|CAA68050.1| steroid membrane binding protein [Sus scrofa]	sp|Q5U1X1|ORN_RAT	1	0.489785	0.318852	0.494699	0.652961
gi|345091067|ref|NP_001230751.1| aldo-keto reductase family 7, member A2 (aflatoxin aldehyde reductase) [Sus scrofa]	sp|P62853|RS25_RAT	1	1.07881	0.64176	0.678608	0.653019
gi|350580973|ref|XP_003123871.3| PREDICTED: alpha-mannosidase 2 [Sus scrofa]	sp|O95861|BPNT1_HUMAN	1	0.83848	0.629454	0.781473	0.653207
gi|47522608|ref|NP_999106.1| dolichyl-diphosphooligosaccharide--protein glycosyltransferase subunit 2 precursor [Sus scrofa] >gi|75056105|sp|Q9GL01.1|RPN2_PIG RecName: Full=Dolichyl-diphosphooligosaccharide--protein glycosyltransferase subunit 2; AltName: Full=Dolichyl-diphosph	sp|Q5U1Z0|RBGPR_RAT	1	1.0583	0.897982	0.998879	0.653587
gi|75054313|sp|Q8WNW3.1|PLAK_PIG RecName: Full=Junction plakoglobin >gi|47523712|ref|NP_999488.1| junction plakoglobin [Sus scrofa] >gi|218103017|emb|CAT82339.1| unnamed protein product [Sus scrofa] >gi|211637711|emb|CAR97094.1| unnamed protein product [Sus scrofa] >gi|158065996|em	sp|P08727|K1C19_HUMAN	1	0.874295	0.793715	0.937147	0.654311
gi|146741296|dbj|BAF62303.1| keratin 1 [Sus scrofa]	sp|O43242|PSMD3_HUMAN	1	0.751099	0.665202	0.481422	0.657211
gi|350578468|ref|XP_003121482.3| PREDICTED: myosin-Vb [Sus scrofa]	sp|Q7TPV4|MBB1A_MOUSE	1	0.908702	0.756063	0.944365	0.657632
gi|45479848|gb|AAS66766.1| histone H1.3-like protein [Sus scrofa]	sp|P51648|AL3A2_HUMAN	1	0.266925	0.555126	0.516441	0.659574
gi|311262177|ref|XP_003129051.1| PREDICTED: electron transfer flavoprotein-ubiquinone oxidoreductase, mitochondrial-like [Sus scrofa]	sp|P07871|THIKB_RAT	1	0.865688	0.656885	0.748307	0.660271
gi|350594745|ref|XP_003483965.1| PREDICTED: inosine triphosphate pyrophosphatase-like [Sus scrofa]	sp|Q1LZ86|ABHD6_BOVIN	1	1.13181	1.02436	1.14613	0.660458
gi|117660446|gb|ABK55621.1| mitochondrial ATP5I [Sus scrofa]	sp|Q8BP67|RL24_MOUSE	1	0.725888	0.784264	0.822335	0.661168
gi|335289328|ref|XP_003355850.1| PREDICTED: ubiquinone biosynthesis protein COQ9, mitochondrial-like [Sus scrofa]	sp|Q15043|S39AE_HUMAN	1	1.57534	0.970112	0.798257	0.66127
gi|194035204|ref|XP_001928235.1| PREDICTED: 5~-nucleotidase domain-containing protein 1 [Sus scrofa]	sp|Q3SZ19|PSMD9_BOVIN	1	1.38526	1.10914	1.23694	0.661381
gi|347800709|ref|NP_001231660.1| scinderin [Sus scrofa]	sp|Q3YIX4|PEBP1_CANFA	1	1.25511	0.820237	1.00538	0.662002
gi|138753471|emb|CAM59483.1| tyrosine 3-monooxygenase/tryptophan 5-monooxygenase activation protein, theta polypeptide [Sus scrofa]	sp|Q5JTJ3|CA031_HUMAN	1	1.48446	0.957627	0.742938	0.663842
gi|335297524|ref|XP_003358060.1| PREDICTED: 116 kDa U5 small nuclear ribonucleoprotein component [Sus scrofa] >gi|311267074|ref|XP_003131380.1| PREDICTED: 116 kDa U5 small nuclear ribonucleoprotein component isoform 1 [Sus scrofa]	sp|O88428|PAPS2_MOUSE	1	1.28591	0.97832	1.07317	0.663957
gi|194042318|ref|XP_001928917.1| PREDICTED: putative hexokinase HKDC1 [Sus scrofa]	sp|P45954|ACDSB_HUMAN	1	1.17115	0.783057	0.713795	0.664568
gi|311259100|ref|XP_003127931.1| PREDICTED: meprin A subunit beta [Sus scrofa]	sp|Q4R947|TCP4_MACFA	1	0.886525	0.884752	0.927305	0.664894
gi|3913338|sp|O46658.3|CP2DP_PIG RecName: Full=Vitamin D(3) 25-hydroxylase; AltName: Full=CYPIID25; AltName: Full=Cytochrome P450 2D25 >gi|47523842|ref|NP_999559.1| vitamin D(3) 25-hydroxylase [Sus scrofa] >gi|2956688|emb|CAA76205.1| vitamin D3 25-Hydroxylase (CYP2D25) [Sus scrofa]	sp|Q5U2X0|CARF_RAT	1	2.21135	1.31702	1.60845	0.666296
gi|335289614|ref|XP_003355933.1| PREDICTED: alpha-actinin-4-like isoform 4 [Sus scrofa]	sp|Q4R6K9|NDUS1_MACFA	1	1.475	0.618421	0.852632	0.675
gi|311249343|ref|XP_003123584.1| PREDICTED: coatomer subunit epsilon-like isoform 1 [Sus scrofa]	sp|Q3SZP7|VILI_BOVIN	1	1.46818	0.836364	1.34318	0.677273
gi|75053043|sp|Q6UAQ8.3|ETFB_PIG RecName: Full=Electron transfer flavoprotein subunit beta; Short=Beta-ETF >gi|328550534|ref|NP_001192208.1| electron transfer flavoprotein subunit beta [Sus scrofa] >gi|35384838|gb|AAQ84565.1| electron transfer flavoprotein beta subunit precursor [S	sp|Q96PD6|MOGT1_HUMAN	1	1.55626	0.721193	0.704474	0.678717
gi|335292025|ref|XP_003128369.2| PREDICTED: butyrophilin subfamily 1 member A1-like [Sus scrofa]	sp|P19111|PPBI_BOVIN	1	0.958607	0.599212	0.667543	0.680026
gi|385648282|ref|NP_001245314.1| glucosidase, beta (bile acid) 2 [Sus scrofa]	sp|O95299|NDUAA_HUMAN	1	1.06592	0.535747	0.893222	0.68338
gi|1900|emb|CAA27575.1| unnamed protein product [Sus scrofa]	sp|Q58DW4|RSMB_BOVIN	1	1.51768	1.39887	1.06223	0.684583
gi|311254260|ref|XP_001929592.2| PREDICTED: interleukin enhancer-binding factor 2 [Sus scrofa]	sp|Q9CSU0|RPR1B_MOUSE	1	1.28392	1.06573	1.0014	0.685315
gi|350587465|ref|XP_003128987.3| PREDICTED: RNA-binding protein 47-like isoform 1 [Sus scrofa]	sp|Q9DCM2|GSTK1_MOUSE	1	1.96656	1.1258	1.20541	0.687898
gi|350581864|ref|XP_003481142.1| PREDICTED: protein disulfide-isomerase A2-like [Sus scrofa]	sp|Q95KK4|SSBP_RABIT	1	0.802857	0.848571	0.785714	0.688571
gi|335310888|ref|XP_003362240.1| PREDICTED: importin subunit alpha-4-like, partial [Sus scrofa]	sp|Q14315|FLNC_HUMAN	1	2.04545	1.22727	1.41711	0.692513
gi|335292522|ref|XP_001924480.2| PREDICTED: proteasome subunit beta type-5 [Sus scrofa]	sp|Q95107|WASL_BOVIN	1	0.480609	1.23407	0.893352	0.692521
gi|448581|prf||1917268B pyruvate dehydrogenase:SUBUNIT=beta	sp|A5PKI3|FAM3C_BOVIN	1	2.00876	0.968476	0.879159	0.69352
gi|335297609|ref|XP_003358079.1| PREDICTED: synaptic vesicle membrane protein VAT-1 homolog [Sus scrofa]	sp|Q8IVP5|FUND1_HUMAN	1	1.20841	0.838879	1.12609	0.69352
gi|113205780|ref|NP_001038049.1| quinone oxidoreductase [Sus scrofa] >gi|104295137|gb|ABF72038.1| zeta-crystallin [Sus scrofa]	sp|O60220|TIM8A_HUMAN	1	0.849387	0.779335	0.838879	0.694688
gi|350584903|ref|XP_003126945.3| PREDICTED: AP-1 complex subunit gamma-1 isoform 1 [Sus scrofa]	sp|P62892|RL39_MOUSE	1	1.52637	0.832278	0.954641	0.696203
gi|365796119|dbj|BAL43002.1| toll-interacting protein [Sus scrofa]	sp|Q9JM53|AIFM1_RAT	1	0.545295	0.439461	0.372911	0.697449
gi|164359|gb|AAA30992.1| apolipoprotein A-I [Sus scrofa]	sp|Q07984|SSRD_RAT	1	0.873715	0.556535	0.696035	0.700441
gi|350594033|ref|XP_003483821.1| PREDICTED: UDP-glucuronosyltransferase 1-10 isoform 2 [Sus scrofa]	sp|Q9NVH6|TMLH_HUMAN	1	1.35171	1.19405	1.05182	0.702315
gi|350581856|ref|XP_003481139.1| PREDICTED: protein ITFG3-like [Sus scrofa]	sp|Q00013|EM55_HUMAN	1	0.676724	0.649425	0.786398	0.702586
gi|311267394|ref|XP_003131544.1| PREDICTED: 26S proteasome non-ATPase regulatory subunit 3-like [Sus scrofa]	sp|P28482|MK01_HUMAN	1	1.09735	0.518191	0.962635	0.703048
gi|311260926|ref|XP_001924849.2| PREDICTED: sec1 family domain-containing protein 1 [Sus scrofa]	sp|P07602|SAP_HUMAN	1	1.29289	0.512134	0.851883	0.705439
gi|311250082|ref|XP_003123949.1| PREDICTED: isochorismatase domain-containing protein 1-like [Sus scrofa]	sp|Q8BXK9|CLIC5_MOUSE	1	0.995885	0.857339	1.03841	0.706447
gi|350580871|ref|XP_003123769.3| PREDICTED: ras GTPase-activating-like protein IQGAP2-like [Sus scrofa]	sp|Q8HXP3|SODM_MACFA	1	0.93218	0.761938	0.820069	0.706574
gi|290463427|sp|Q0QF01.2|DHSA_PIG RecName: Full=Succinate dehydrogenase [ubiquinone] flavoprotein subunit, mitochondrial; AltName: Full=Flavoprotein subunit of complex II; Short=Fp; Flags: Precursor	sp|O43865|SAHH2_HUMAN	1	1.16735	0.803117	0.80886	0.709598
gi|197251946|ref|NP_001127815.1| actin-related protein 3 [Sus scrofa] >gi|195562215|gb|ACG50179.1| actin-related protein 3-like protein [Sus scrofa]	sp|Q5XI73|GDIR1_RAT	1	1.18297	0.786531	0.692503	0.710292
gi|335296384|ref|XP_003357765.1| PREDICTED: galactose-1-phosphate uridylyltransferase [Sus scrofa]	sp|D3ZTX0|TMED7_RAT	1	1.69852	0.608731	0.815486	0.710873
gi|349732194|ref|NP_001231852.1| armadillo repeat containing 10 [Sus scrofa] >gi|350588904|ref|XP_003482738.1| PREDICTED: armadillo repeat-containing protein 10-like isoform 1 [Sus scrofa]	sp|Q5RC56|NDKA_PONAB	1	2.35563	0.883803	1.48239	0.711268
gi|350578005|ref|XP_001924268.4| PREDICTED: ezrin [Sus scrofa]	sp|Q3SZB7|F16P1_BOVIN	1	0.552778	0.627315	0.572685	0.712037
gi|85701138|sp|Q3ZD69.1|LMNA_PIG RecName: Full=Prelamin-A/C; Contains: RecName: Full=Lamin-A/C; Flags: Precursor >gi|162139823|ref|NP_001104727.1| prelamin-A/C [Sus scrofa] >gi|66352014|gb|AAY44741.1| lamin A [Sus scrofa]	sp|Q13283|G3BP1_HUMAN	1	0.829976	1.03465	0.665592	0.713135
gi|311276941|ref|XP_003135418.1| PREDICTED: apoptosis-inducing factor 1, mitochondrial isoform 1 [Sus scrofa]	sp|P46406|G3P_RABIT	1	0.678414	0.756241	0.819383	0.715125
gi|55977740|sp|Q29387.2|EF1G_PIG RecName: Full=Elongation factor 1-gamma; Short=EF-1-gamma; AltName: Full=eEF-1B gamma >gi|19111049|gb|AAL85414.1|AF480162_1 eukaryotic elongation factor 1 gamma-like protein [Sus scrofa]	sp|Q8BH04|PCKGM_MOUSE	1	1.96192	1.46573	1.38547	0.71529
gi|121149|sp|P20735.1|GGT1_PIG RecName: Full=Gamma-glutamyltranspeptidase 1; Short=GGT 1; AltName: Full=Gamma-glutamyltransferase 1; AltName: Full=Glutathione hydrolase 1; AltName: Full=Leukotriene-C4 hydrolase; AltName: CD_antigen=CD224; Contains: RecName: Full=Gamma-glutamyltra	sp|A0JN39|COPB_BOVIN	1	1.05076	1.24365	0.978426	0.715736
gi|1710093|sp|P50121.2|RET2_PIG RecName: Full=Retinol-binding protein 2; AltName: Full=Cellular retinol-binding protein II; Short=CRBP-II >gi|55741711|ref|NP_999616.1| retinol-binding protein 2 [Sus scrofa] >gi|455523|emb|CAA54729.1| cellular retinol binding protein II [Sus scrofa	sp|P36578|RL4_HUMAN	1	2.32209	0.645706	0.588957	0.716258
gi|350581449|ref|XP_003481037.1| PREDICTED: guanine nucleotide-binding protein G(I)/G(S)/G(T) subunit beta-2-like [Sus scrofa] >gi|311251041|ref|XP_003124417.1| PREDICTED: guanine nucleotide-binding protein G(I)/G(S)/G(T) subunit beta-2-like isoform 2 [Sus scrofa]	sp|Q5R6B5|AL1B1_PONAB	1	1.65251	0.715573	0.863578	0.71686
gi|350587641|ref|XP_003129114.3| PREDICTED: UDP-glucuronosyltransferase 2C1-like [Sus scrofa]	sp|Q6P1M0|S27A4_HUMAN	1	2.60563	1.33803	1.03443	0.719875
gi|335281104|ref|XP_003353734.1| PREDICTED: argininosuccinate synthase [Sus scrofa]	sp|P16460|ASSY_MOUSE	1	0.910448	0.768657	0.80597	0.720149
gi|350592969|ref|XP_003483583.1| PREDICTED: phosphoglycerate mutase 1-like [Sus scrofa]	sp|A4W577|GHRB_ENT38	1	1.3322	0.937429	0.945392	0.721274
gi|47523650|ref|NP_999459.1| tropomodulin-3 [Sus scrofa] >gi|7288863|gb|AAF45300.1|AF237632_1 ubiquitous tropomodulin U-Tmod [Sus scrofa]	sp|Q6UXC1|AEGP_HUMAN	1	0.747813	1.04665	0.800292	0.721574
gi|47522956|ref|NP_999236.1| N-acetylneuraminate lyase [Sus scrofa] >gi|75049298|sp|Q9BEC7.1|NPL_PIG RecName: Full=N-acetylneuraminate lyase; Short=NALase; AltName: Full=N-acetylneuraminate pyruvate-lyase; AltName: Full=N-acetylneuraminic acid aldolase; AltName: Full=Sialate ly	sp|P68372|TBB4B_MOUSE	1	0.876923	0.775385	0.935385	0.723077
gi|311265230|ref|XP_003130552.1| PREDICTED: 3~(2~),5~-bisphosphate nucleotidase 1-like isoform 2 [Sus scrofa]	sp|Q641Z6|EHD1_RAT	1	1.29816	0.842945	1.07607	0.723926
gi|350591864|ref|XP_001926353.4| PREDICTED: LOW QUALITY PROTEIN: melanotransferrin [Sus scrofa]	sp|Q64213|SF01_MOUSE	1	0.437984	0.46124	0.437984	0.724806
gi|19883961|sp|P35750.3|CAN1_PIG RecName: Full=Calpain-1 catalytic subunit; AltName: Full=Calcium-activated neutral proteinase 1; Short=CANP 1; AltName: Full=Calpain mu-type; AltName: Full=Calpain-1 large subunit; AltName: Full=Micromolar-calpain; Short=muCANP >gi|8132993|gb|AAF734	sp|P51432|PLCB3_MOUSE	1	1.84961	0.96401	1.22751	0.727506
gi|335301722|ref|XP_003133098.2| PREDICTED: cell division cycle and apoptosis regulator protein 1-like [Sus scrofa]	sp|Q00PI9|HNRL2_MOUSE	1	0.425647	0.737069	0.681034	0.729526
gi|350594031|ref|XP_003483820.1| PREDICTED: UDP-glucuronosyltransferase 1-10 isoform 1 [Sus scrofa]	sp|P30999|CTND1_MOUSE	1	0.989218	0.530323	0.710916	0.731806
gi|147899011|ref|NP_001090950.1| 40S ribosomal protein S26 [Sus scrofa] >gi|187606917|sp|P49171.4|RS26_PIG RecName: Full=40S ribosomal protein S26 >gi|117661156|gb|ABK55657.1| RPS26 [Sus scrofa]	sp|B0BNE2|RPAB1_RAT	1	1.4895	1.12924	1.14863	0.731826
gi|2258465|gb|AAB94003.1| succinyl-CoA synthetase alpha subunit [Sus scrofa]	sp|P62076|TIM13_RAT	1	1.22129	0.784314	0.896359	0.736695
gi|45268981|gb|AAS55903.1| 60S ribosomal protein L12, partial [Sus scrofa]	sp|P21619|LMNB2_MOUSE	1	0.906051	0.742038	0.888535	0.738854
gi|343790856|ref|NP_001230567.1| glutathione transferase zeta 1 [Sus scrofa]	sp|P13639|EF2_HUMAN	1	1.37232	0.658711	0.940334	0.739857
gi|335281298|ref|XP_003122400.2| PREDICTED: tubulin beta-2C chain-like [Sus scrofa]	sp|A6QQT9|ILVBL_BOVIN	1	0.755454	0.675086	0.41791	0.741676
gi|343790920|ref|NP_001230517.1| fumarate hydratase [Sus scrofa]	sp|P14733|LMNB1_MOUSE	1	1.16458	0.851521	0.695886	0.742397
gi|335298275|ref|XP_003131863.2| PREDICTED: glyoxalase domain-containing protein 4-like [Sus scrofa]	sp|Q96M27|PRRC1_HUMAN	1	1.50242	0.971014	0.838969	0.743961
gi|281427374|ref|NP_001163991.1| T-complex protein 1 subunit beta [Sus scrofa] >gi|262036935|dbj|BAI47602.1| chaperonin containing TCP1, subunit 2 (beta) [Sus scrofa]	sp|Q00577|PURA_HUMAN	1	1.24209	0.816456	0.887658	0.745253
gi|350577999|ref|XP_001928755.4| PREDICTED: ezrin-like [Sus scrofa]	sp|P80317|TCPZ_MOUSE	1	2.31459	1.09574	0.910334	0.74924
gi|163310773|ref|NP_001090990.2| membrane-associated progesterone receptor component 2 [Sus scrofa] >gi|160688702|gb|ABX45133.1| progesterone receptor membrane component 2 [Sus scrofa] >gi|160688700|gb|ABX45132.1| progesterone receptor membrane component 2 [Sus scrofa]	sp|Q9H773|DCTP1_HUMAN	1	0.676233	0.725561	0.690583	0.750673
gi|45268989|gb|AAS55907.1| glutaredoxin, partial [Sus scrofa]	sp|Q3SYU9|MVP_BOVIN	1	0.551935	0.792261	0.473184	0.750849
gi|342349340|ref|NP_001230146.1| carnitine O-octanoyltransferase [Sus scrofa]	sp|P22695|QCR2_HUMAN	1	0.771765	0.797647	0.705882	0.755294
gi|335309772|ref|XP_003361762.1| PREDICTED: acyl-coenzyme A thioesterase 2, mitochondrial-like, partial [Sus scrofa]	sp|Q14894|CRYM_HUMAN	1	1.34021	0.958763	0.935765	0.757335
gi|47522618|ref|NP_999099.1| vinculin [Sus scrofa] >gi|17979613|gb|AAL50327.1| vinculin [Sus scrofa]	sp|P57737|CORO7_HUMAN	1	0.93763	0.72869	0.879418	0.758836
gi|311265237|ref|XP_003130554.1| PREDICTED: LOW QUALITY PROTEIN: rab3 GTPase-activating protein non-catalytic subunit-like [Sus scrofa]	sp|Q99M87|DNJA3_MOUSE	1	0.445048	0.839976	0.940821	0.759058
gi|311271975|ref|XP_001926332.2| PREDICTED: short/branched chain specific acyl-CoA dehydrogenase, mitochondrial [Sus scrofa]	sp|Q5RAU5|CHMP3_PONAB	1	0.876829	0.535366	0.929268	0.760976
gi|335301140|ref|XP_003359135.1| PREDICTED: transmembrane emp24 domain-containing protein 2-like isoform 1 [Sus scrofa]	sp|P49748|ACADV_HUMAN	1	1.28614	0.889717	1.0313	0.76155
gi|311255888|ref|XP_003126410.1| PREDICTED: cullin-associated NEDD8-dissociated protein 1-like [Sus scrofa]	sp|Q32LH4|NIT1_BOVIN	1	1.22071	0.83107	1.09423	0.764856
gi|37787313|gb|AAP69607.1| nicotinate phosphoribosyltransferase-like protein [Sus scrofa]	sp|Q5E9F5|TAGL2_BOVIN	1	0.863153	0.969536	1.13346	0.770309
gi|47523670|ref|NP_999471.1| peroxisomal multifunctional enzyme type 2 [Sus scrofa] >gi|499340|emb|CAA55037.1| 17beta-estradiol dehydrogenase [Sus scrofa]	sp|P51859|HDGF_MOUSE	1	0.750505	0.74899	0.506566	0.772222
gi|350587731|ref|XP_003357047.2| PREDICTED: LPS-responsive vesicle trafficking, beach and anchor containing, partial [Sus scrofa]	sp|Q2HWF0|FBP1L_RAT	1	0.941597	0.676608	0.726623	0.77229
gi|311269055|ref|XP_003132321.1| PREDICTED: monoacylglycerol lipase ABHD6 [Sus scrofa]	sp|Q6Q473|CLCA4_MOUSE	1	1.40533	0.852022	0.956801	0.774816
gi|350584410|ref|XP_003355641.2| PREDICTED: lysophospholipid acyltransferase 5 [Sus scrofa]	sp|Q99KW3|TARA_MOUSE	1	1.21555	0.774898	0.643929	0.774898
gi|350595062|ref|XP_003484035.1| PREDICTED: extended synaptotagmin-2 [Sus scrofa]	sp|Q9NYL4|FKB11_HUMAN	1	0.359567	0.519429	0.965568	0.776193
gi|350579876|ref|XP_003122484.3| PREDICTED: protein unc-93 homolog B1-like [Sus scrofa]	sp|P68365|TBA1C_CRIGR	1	1.25874	0.900538	1.12903	0.776882
gi|311254039|ref|XP_003125724.1| PREDICTED: mucosal pentraxin-like [Sus scrofa]	sp|Q99471|PFD5_HUMAN	1	1.26092	3.06492	2.98502	0.779026
gi|47523762|ref|NP_999517.1| plasma membrane calcium-transporting ATPase 1 [Sus scrofa] >gi|114319|sp|P23220.1|AT2B1_PIG RecName: Full=Plasma membrane calcium-transporting ATPase 1; Short=PMCA1; AltName: Full=Plasma membrane calcium pump isoform 1 >gi|2061|emb|CAA37536.1| plasm	sp|O75908|SOAT2_HUMAN	1	1.38034	0.757696	0.860973	0.780536
gi|350586779|ref|XP_003482273.1| PREDICTED: LOW QUALITY PROTEIN: IQ motif containing GTPase activating protein 1 [Sus scrofa]	sp|Q1LZH9|GNS_BOVIN	1	1.32692	0.948381	1.06781	0.781377
gi|52001458|sp|P22411.3|DPP4_PIG RecName: Full=Dipeptidyl peptidase 4; AltName: Full=Dipeptidyl peptidase IV; Short=DPP IV; AltName: Full=T-cell activation antigen CD26; AltName: CD_antigen=CD26; Contains: RecName: Full=Dipeptidyl peptidase 4 membrane form; AltName: Full=Dipeptidyl	sp|Q5XIG8|STRAP_RAT	1	0.919087	0.856846	1.03008	0.78527
gi|335287709|ref|XP_003355421.1| PREDICTED: peptidyl-prolyl cis-trans isomerase FKBP11-like isoform 2 [Sus scrofa] >gi|311255241|ref|XP_003126145.1| PREDICTED: peptidyl-prolyl cis-trans isomerase FKBP11-like isoform 1 [Sus scrofa]	sp|P61089|UBE2N_MOUSE	1	1.45274	1.13806	0.946517	0.78607
gi|350591042|ref|XP_003132145.3| PREDICTED: programmed cell death 6-interacting protein [Sus scrofa]	sp|Q8K1Z0|COQ9_MOUSE	1	1.09472	0.93765	0.888489	0.78777
gi|346421316|ref|NP_001177161.2| 2,4-dienoyl-CoA reductase, mitochondrial [Sus scrofa]	sp|P56812|PDCD5_MOUSE	1	0.984032	0.856287	0.982036	0.788423
gi|147903209|ref|NP_001090934.1| small nuclear ribonucleoprotein E [Sus scrofa] >gi|166233313|sp|A1XQR9.1|RUXE_PIG RecName: Full=Small nuclear ribonucleoprotein E; Short=snRNP-E; AltName: Full=Sm protein E; Short=Sm-E; Short=SmE >gi|117660560|gb|ABK55626.1| NDUFB2 [Sus scrofa] >gi|	sp|P57780|ACTN4_MOUSE	1	1.12644	1.08945	0.928138	0.790479
gi|122142619|sp|Q19S50.1|STAT3_PIG RecName: Full=Signal transducer and activator of transcription 3 >gi|113205774|ref|NP_001038045.1| signal transducer and activator of transcription 3 [Sus scrofa] >gi|315273320|gb|ADU03227.1| signal transducer and activator of transcription 3 isofor	sp|O43707|ACTN4_HUMAN	1	1.0807	0.883315	0.760087	0.790622
gi|194038586|ref|XP_001926746.1| PREDICTED: transmembrane emp24 domain-containing protein 10 [Sus scrofa]	sp|Q3ZCQ8|TIM50_HUMAN	1	1.76613	1.09194	1.02419	0.791935
gi|350597075|ref|XP_003362049.2| PREDICTED: hypothetical protein LOC100626369 [Sus scrofa]	sp|A9L913|RS9_PAPAN	1	1.5	0.766323	1.25945	0.792096
gi|343098455|ref|NP_001230202.1| ras-related protein Rab-6A [Sus scrofa]	sp|Q5XIA2|CA144_RAT	1	1.06434	0.752011	1.09651	0.793566
gi|311275542|ref|XP_003134785.1| PREDICTED: protein FAM3C-like [Sus scrofa]	sp|Q5R9E1|HMGCL_PONAB	1	1.28028	1.03633	1.12803	0.794118
gi|297591959|ref|NP_001172060.1| farnesyl pyrophosphate synthase precursor [Sus scrofa] >gi|262072800|dbj|BAI47708.1| farnesyl diphosphate synthase [Sus scrofa]	sp|Q5R8D0|GALE_PONAB	1	1.1597	0.751574	1.11219	0.799084
gi|346716331|ref|NP_001231183.1| ras-related protein Rab-5C [Sus scrofa]	sp|Q7TST0|BTNL1_MOUSE	1	1.86742	0.875	1.00379	0.799242
gi|93359412|gb|ABF13285.1| proliferating cell nuclear antigen [Sus scrofa]	sp|P16930|FAAA_HUMAN	1	1.93573	1.74807	1.66581	0.802057
gi|55583765|sp|Q863Z0.3|PSME2_PIG RecName: Full=Proteasome activator complex subunit 2; AltName: Full=Proteasome activator 28 subunit beta; Short=PA28b; Short=PA28beta >gi|47523632|ref|NP_999444.1| proteasome activator complex subunit 2 [Sus scrofa] >gi|34978648|gb|AAQ83575.1| prote	sp|Q9R010|CIB1_RAT	1	0.741135	0.851064	0.819149	0.804965
gi|350582032|ref|XP_003124901.3| PREDICTED: GRIP and coiled-coil domain-containing protein 2 [Sus scrofa]	sp|P28074|PSB5_HUMAN	1	0.469645	0.829324	0.890034	0.805269
gi|47523066|ref|NP_999296.1| caspase-3 [Sus scrofa] >gi|54035961|sp|Q95ND5.1|CASP3_PIG RecName: Full=Caspase-3; Short=CASP-3; Contains: RecName: Full=Caspase-3 subunit p17; Contains: RecName: Full=Caspase-3 subunit p12; Flags: Precursor >gi|14090240|dbj|BAB55544.1| caspase-3 [S	sp|Q13243|SRSF5_HUMAN	1	1.5176	0.8056	0.868	0.8072
gi|156120152|ref|NP_001095294.1| complement factor B precursor [Sus scrofa] >gi|148724909|emb|CAN87697.1| B-factor, properdin [Sus scrofa]	sp|Q5RA10|ADDA_PONAB	1	1.89533	1.23338	1.47666	0.807638
gi|47523420|ref|NP_999331.1| trans-1,2-dihydrobenzene-1,2-diol dehydrogenase [Sus scrofa] >gi|75051805|sp|Q9TV69.1|DHDH_PIG RecName: Full=Trans-1,2-dihydrobenzene-1,2-diol dehydrogenase; AltName: Full=D-xylose 1-dehydrogenase; AltName: Full=D-xylose-NADP dehydrogenase; AltName:	sp|Q5RA81|GRPE1_PONAB	1	1.34328	1.23174	1.07934	0.808327
gi|311272155|ref|XP_003133324.1| PREDICTED: activated RNA polymerase II transcriptional coactivator p15-like [Sus scrofa]	sp|O60701|UGDH_HUMAN	1	0.739669	1	0.61157	0.809917
gi|335293373|ref|XP_003356947.1| PREDICTED: UDP-glucose 6-dehydrogenase-like isoform 1 [Sus scrofa]	sp|Q80X89|UD2A1_MOUSE	1	1.63947	1.51632	1.83457	0.813056
gi|343488509|ref|NP_001230414.1| valacyclovir hydrolase precursor [Sus scrofa]	sp|O60763|USO1_HUMAN	1	0.909722	0.695437	0.799603	0.813492
gi|335307327|ref|XP_003127745.2| PREDICTED: heterogeneous nuclear ribonucleoprotein R [Sus scrofa]	sp|Q9BUT1|BDH2_HUMAN	1	1.72894	1.40123	1.49158	0.814701
gi|194038973|ref|XP_001929258.1| PREDICTED: purine nucleoside phosphorylase [Sus scrofa]	sp|Q05B71|CISD2_BOVIN	1	1.46667	1.39316	1.89231	0.815385
gi|345507398|gb|AEO00198.1| mucin 13B [Sus scrofa]	sp|Q96I23|PREY_HUMAN	1	0.345821	0.851585	0.746398	0.817003
gi|342349346|ref|NP_001230149.1| lon peptidase 1, mitochondrial [Sus scrofa]	sp|P48444|COPD_HUMAN	1	1.42802	0.798962	1.0428	0.827497
gi|350578880|ref|XP_003480471.1| PREDICTED: tight junction protein ZO-1-like, partial [Sus scrofa]	sp|Q8HXW2|CMC2_MACFA	1	1.01511	1.10121	0.68429	0.827795
gi|335289683|ref|XP_003355956.1| PREDICTED: LOW QUALITY PROTEIN: mitochondrial import inner membrane translocase subunit TIM50-like [Sus scrofa]	sp|P57016|LAD1_MOUSE	1	1.11993	0.626102	0.619929	0.828924
gi|34978340|sp|P36887.4|KAPCA_PIG RecName: Full=cAMP-dependent protein kinase catalytic subunit alpha; Short=PKA C-alpha	sp|Q03249|GALT_MOUSE	1	0.693411	0.628055	0.523379	0.831562
gi|311262216|ref|XP_003129070.1| PREDICTED: LOW QUALITY PROTEIN: signal recognition particle 72 kDa protein-like [Sus scrofa]	sp|P21399|ACOC_HUMAN	1	1.10335	0.879921	1.29626	0.832677
gi|311275228|ref|XP_003134621.1| PREDICTED: glutathione S-transferase kappa 1-like isoform 1 [Sus scrofa]	sp|Q4R4X4|VIME_MACFA	1	0.911504	0.775811	0.930678	0.833333
gi|148230268|ref|NP_001090970.1| galectin-3 [Sus scrofa] >gi|124830340|gb|ABN15099.1| lectin galactoside-binding soluble 3 [Sus scrofa]	sp|Q5R5H5|RAB18_PONAB	1	0.552998	0.9106	0.769807	0.833512
gi|335309396|ref|XP_003361623.1| PREDICTED: adenylate kinase 2, mitochondrial-like isoform 1 [Sus scrofa]	sp|Q5R636|K6PP_PONAB	1	1.31928	0.888889	1.0613	0.842912
gi|311271149|ref|XP_003133065.1| PREDICTED: uncharacterized protein C1orf31 homolog [Sus scrofa]	sp|Q8R4N0|CLYBL_MOUSE	1	0.274691	0.676587	0.607848	0.849881
gi|47522864|ref|NP_999186.1| unconventional myosin-VI [Sus scrofa] >gi|75039721|sp|Q29122.1|MYO6_PIG RecName: Full=Unconventional myosin-VI; AltName: Full=Unconventional myosin-6 >gi|516155|emb|CAA84559.1| unconventional myosin [Sus scrofa]	sp|Q5R6E0|U5S1_PONAB	1	0.727019	0.623955	0.628598	0.850511
gi|350589372|ref|XP_003130644.3| PREDICTED: receptor-type tyrosine-protein phosphatase C [Sus scrofa]	sp|Q9D8C4|IN35_MOUSE	1	1.26145	0.649926	1.53471	0.850812
gi|335286672|ref|XP_003125720.2| PREDICTED: transgelin-2-like isoform 1 [Sus scrofa] >gi|335286674|ref|XP_003355153.1| PREDICTED: transgelin-2-like isoform 2 [Sus scrofa]	sp|Q62465|VAT1_MOUSE	1	1.77409	0.877076	1.01827	0.853821
gi|335288215|ref|XP_003355555.1| PREDICTED: N-acetylglucosamine-6-sulfatase, partial [Sus scrofa]	sp|Q11011|PSA_MOUSE	1	1.47573	1.24272	1.60194	0.854369
gi|312062795|ref|NP_001185851.1| mitogen-activated protein kinase 1 [Sus scrofa] >gi|310789265|gb|ADP24686.1| extracellular signal-regulated kinase-2 [Sus scrofa]	sp|Q5I0D1|GLOD4_RAT	1	1.42333	1.01333	1.08	0.856667
gi|346227212|ref|NP_001230992.1| ribosomal protein L3 [Sus scrofa]	sp|Q91VW5|GOGA4_MOUSE	1	1.26232	1.06916	1.09459	0.856916
gi|6729859|pdb|1B0J|A Chain A, Crystal Structure Of Aconitase With Isocitrate	sp|P27816|MAP4_HUMAN	1	1.52778	0.974206	0.892857	0.857143
gi|335288415|ref|XP_003355612.1| PREDICTED: serine-threonine kinase receptor-associated protein-like [Sus scrofa]	sp|Q5RE69|NEP_PONAB	1	1.28951	0.803453	1.29748	0.860558
gi|335290692|ref|XP_003356250.1| PREDICTED: UDP-glucose 4-epimerase [Sus scrofa]	sp|Q4KWH5|PLCH1_MOUSE	1	1.47099	0.722672	0.807018	0.863023
gi|350594202|ref|XP_003133916.3| PREDICTED: threonyl-tRNA synthetase, cytoplasmic-like [Sus scrofa]	sp|Q8K0D5|EFGM_MOUSE	1	1.8707	1.13343	1.78955	0.865199
gi|194043083|ref|XP_001928729.1| PREDICTED: malectin-like [Sus scrofa]	sp|P50990|TCPQ_HUMAN	1	0.473797	0.625668	0.657754	0.86631
gi|194044626|ref|XP_001927289.1| PREDICTED: 14-3-3 protein beta/alpha isoform 1 [Sus scrofa]	sp|P16152|CBR1_HUMAN	1	1.09212	1.24848	0.796364	0.867879
gi|62510530|sp|Q8MJ30.1|DHPR_PIG RecName: Full=Dihydropteridine reductase; AltName: Full=HDHPR; AltName: Full=Quinoid dihydropteridine reductase >gi|47523746|ref|NP_999508.1| dihydropteridine reductase [Sus scrofa] >gi|22094813|gb|AAM91996.1|AF526879_1 quinoid dihydropteridine redu	sp|Q63524|TMED2_RAT	1	1.40666	0.864447	0.812128	0.869203
gi|350586271|ref|XP_003482146.1| PREDICTED: E3 ubiquitin-protein ligase HECTD3-like, partial [Sus scrofa]	sp|Q8CH18|CCAR1_MOUSE	1	2.10704	1.33458	2.16392	0.873503
gi|194042142|ref|XP_001929035.1| PREDICTED: BAG family molecular chaperone regulator 3 [Sus scrofa]	sp|Q9D819|IPYR_MOUSE	1	0.755814	0.78343	0.626453	0.873547
gi|194040624|ref|XP_001929173.1| PREDICTED: plastin-2 isoform 1 [Sus scrofa]	sp|Q24K02|IDE_BOVIN	1	1.33419	0.95641	1.32479	0.876923
gi|218664471|ref|NP_001136304.1| methionine adenosyltransferase 2 subunit beta [Sus scrofa] >gi|198448579|gb|ACH88506.1| methionine adenosyltransferase 2beta [Sus scrofa]	sp|P54886|P5CS_HUMAN	1	1.56877	0.795539	1.1803	0.879182
gi|335284676|ref|XP_003124691.2| PREDICTED: coronin-7-like [Sus scrofa]	sp|Q91WU5|AS3MT_MOUSE	1	0.952096	0.986527	0.79491	0.881737
gi|47523406|ref|NP_999324.1| polymeric immunoglobulin receptor precursor [Sus scrofa] >gi|6863080|dbj|BAA84283.2| poly-Ig receptor [Sus scrofa]	sp|P05455|LA_HUMAN	1	0.901509	1.19301	1.21048	0.884035
gi|350588024|ref|XP_003482537.1| PREDICTED: heterogeneous nuclear ribonucleoprotein D0-like [Sus scrofa]	sp|P68368|TBA4A_MOUSE	1	1.04054	1.23423	0.893393	0.884384
gi|350580558|ref|XP_003354114.2| PREDICTED: dynamin-2-like [Sus scrofa]	sp|P82909|RT36_HUMAN	1	1.29328	0.891202	0.754967	0.885525
gi|509403|emb|CAA84355.1| BAT1 [Sus scrofa]	sp|Q2T9N1|F1142_BOVIN	1	3.94802	1.99257	1.51238	0.886139
gi|335281280|ref|XP_003122383.2| PREDICTED: apical endosomal glycoprotein [Sus scrofa]	sp|A3KMV5|UBA1_BOVIN	1	1.25281	0.483146	1.06742	0.88764
gi|350579657|ref|XP_001927830.3| PREDICTED: 78 kDa glucose-regulated protein [Sus scrofa]	sp|Q08211|DHX9_HUMAN	1	0.568786	0.931792	0.863584	0.887861
gi|145279215|ref|NP_001077410.1| angiotensin-converting enzyme isoform 2 precursor [Sus scrofa] >gi|119381511|gb|ABL73884.1| angiotensin I converting enzyme [Sus scrofa]	sp|Q7TMK9|HNRPQ_MOUSE	1	1.4053	1.39489	1.2017	0.888258
gi|255918208|ref|NP_999319.2| thioredoxin reductase 1, cytoplasmic [Sus scrofa]	sp|Q8BFW7|LPP_MOUSE	1	1.35074	0.982266	1.19212	0.88867
gi|350578484|ref|XP_003121491.3| PREDICTED: NAD-dependent malic enzyme, mitochondrial [Sus scrofa]	sp|Q5REX5|ABHDA_PONAB	1	0.954488	0.896334	1.21871	0.888748
gi|311261988|ref|XP_003128958.1| PREDICTED: phosphoglucomutase-2 [Sus scrofa]	sp|Q9TRY9|BGAL_CANFA	1	1.05274	1.44261	1.64012	0.889349
gi|335301996|ref|XP_001925416.3| PREDICTED: insulin-degrading enzyme isoform 1 [Sus scrofa]	sp|Q2KJG4|MGST2_BOVIN	1	1.3309	1.30612	1.33382	0.892128
gi|350579496|ref|XP_003353657.2| PREDICTED: proteasome-associated protein ECM29 homolog [Sus scrofa]	sp|P62751|RL23A_MOUSE	1	2.03394	1.40731	1.16971	0.894256
gi|47523192|ref|NP_998993.1| IgG heavy chain precursor [Sus scrofa] >gi|5052050|gb|AAD38418.1|AF062384_1 IgG heavy chain precursor [Sus scrofa]	sp|Q5REI7|KAD2_PONAB	1	0.837838	1.1982	0.72973	0.900901
gi|311250237|ref|XP_003124024.1| PREDICTED: stress-70 protein, mitochondrial [Sus scrofa]	sp|Q3SZ63|NOP56_BOVIN	1	0.783375	0.881612	0.97733	0.903023
gi|311246098|ref|XP_003122082.1| PREDICTED: coronin-2A-like [Sus scrofa]	sp|Q5T6F2|UBAP2_HUMAN	1	1.32715	1.09049	0.663573	0.904872
gi|311262008|ref|XP_003128969.1| PREDICTED: protein NOXP20-like [Sus scrofa]	sp|Q7YR75|RM12_BOVIN	1	0.681898	0.618629	1.04218	0.905097
gi|55926217|ref|NP_001007518.1| cytochrome c oxidase subunit 5B, mitochondrial precursor [Sus scrofa] >gi|75042739|sp|Q5S3G4.1|COX5B_PIG RecName: Full=Cytochrome c oxidase subunit 5B, mitochondrial; AltName: Full=Cytochrome c oxidase polypeptide Vb; Flags: Precursor >gi|55583747|g	sp|P62260|1433E_RAT	1	0.702941	0.961765	0.880882	0.905882
gi|311273371|ref|XP_003133833.1| PREDICTED: NADH dehydrogenase [ubiquinone] 1 alpha subcomplex subunit 10, mitochondrial-like [Sus scrofa]	sp|Q86TX2|ACOT1_HUMAN	1	1.24839	1.06049	1.13256	0.911197
gi|350585075|ref|XP_003481870.1| PREDICTED: xaa-Pro dipeptidase-like [Sus scrofa]	sp|P13716|HEM2_HUMAN	1	0.657084	0.660344	0.750148	0.914938
gi|113205886|ref|NP_001038075.1| nucleoside diphosphate kinase B [Sus scrofa] >gi|115311824|sp|Q2EN76.1|NDKB_PIG RecName: Full=Nucleoside diphosphate kinase B; Short=NDK B; Short=NDP kinase B; AltName: Full=Histidine protein kinase NDKB >gi|87047646|gb|ABD18456.1| nm23-H2 [Sus scro	sp|Q2T9P4|NASP_BOVIN	1	0.838213	1.24037	1.24037	0.916795
gi|350593231|ref|XP_003359478.2| PREDICTED: lactase-phlorizin hydrolase-like [Sus scrofa]	sp|Q5RF26|NUCL_PONAB	1	1.09326	1.29879	1.18135	0.924007
gi|335298830|ref|XP_001925616.3| PREDICTED: golgin subfamily A member 4 [Sus scrofa]	sp|P61961|UFM1_MOUSE	1	0.535354	1.211	1.02245	0.925926
gi|178056588|ref|NP_001116645.1| ras-related protein Rab-1B [Sus scrofa] >gi|122064946|sp|Q06AU7.1|RAB1B_PIG RecName: Full=Ras-related protein Rab-1B >gi|115394758|gb|ABI97173.1| RAB1B [Sus scrofa]	sp|Q15233|NONO_HUMAN	1	1.43556	0.864444	0.88	0.926667
gi|350582129|ref|XP_003354780.2| PREDICTED: ig kappa chain V-II region RPMI 6410-like [Sus scrofa]	sp|Q9WV25|PUF60_RAT	1	0.383234	1.16168	0.946108	0.934132
gi|350586674|ref|XP_001929500.4| PREDICTED: exportin-5 [Sus scrofa]	sp|Q5RD26|HNRH2_PONAB	1	1.59899	1.20555	1.18411	0.941992
gi|350581057|ref|XP_003123941.3| PREDICTED: alpha-aminoadipic semialdehyde dehydrogenase-like [Sus scrofa]	sp|A7YY49|SURF4_BOVIN	1	1.40264	1.05564	1.20937	0.954612
gi|297591979|ref|NP_001172070.1| ornithine aminotransferase, mitochondrial [Sus scrofa] >gi|166244455|gb|ABY86572.1| mitochondrial ornithine aminotransferase [Sus scrofa]	sp|P50426|GNS_CAPHI	1	1.29078	0.826241	0.975177	0.964539
gi|297632416|ref|NP_001172092.1| enhancer of rudimentary homolog [Sus scrofa]	sp|Q9Y3D6|FIS1_HUMAN	1	0.432632	1.23474	0.847368	0.977895
gi|350585373|ref|XP_003127406.3| PREDICTED: myosin-14-like [Sus scrofa]	sp|Q5PQN7|LZIC_RAT	1	0.622568	0.758106	0.948119	0.978599
gi|345090993|ref|NP_001230731.1| RAB8A, member RAS oncogene family [Sus scrofa]	sp|P48643|TCPE_HUMAN	1	2.27422	0.750411	1.15271	0.978654
gi|350582270|ref|XP_003125088.3| PREDICTED: zinc finger protein 638-like [Sus scrofa]	sp|O35343|IMA4_MOUSE	1	0.63648	1.0692	1.0991	0.981205
gi|350582355|ref|XP_003354851.2| PREDICTED: exportin-1 [Sus scrofa]	sp|Q2HJG5|VPS35_BOVIN	1	2.08464	1.12391	1.3534	0.981675
gi|116175275|ref|NP_001070689.1| transformer-2 protein homolog beta [Sus scrofa] >gi|115371737|gb|ABI96193.1| TRA2B [Sus scrofa]	sp|P27952|RS2_RAT	1	2.4291	1.56354	1.52486	0.990792
gi|311255413|ref|XP_001927240.2| PREDICTED: keratin, type II cytoskeletal 79 [Sus scrofa]	sp|Q66HA5|C2D1A_RAT	1	0.551559	1.94964	0.853717	0.995204
gi|350592201|ref|XP_003359029.2| PREDICTED: hypothetical protein LOC100620809 isoform 1, partial [Sus scrofa]	sp|P61027|RAB10_MOUSE	1	0.500259	0.648215	0.676151	0.995344
gi|311245238|ref|XP_003121750.1| PREDICTED: lisH domain and HEAT repeat-containing protein KIAA1468-like [Sus scrofa]	sp|P62944|AP2B1_RAT	1	0.946698	0.696987	1.01159	0.996524
gi|297307137|ref|NP_001171999.1| ran-specific GTPase-activating protein [Sus scrofa]	sp|P18827|SDC1_HUMAN	1	0.850435	1.29913	1.08087	0.998261
gi|178056703|ref|NP_001116542.1| angiotensin-converting enzyme 2 precursor [Sus scrofa] >gi|170066580|gb|ACB06678.1| angiotensin converting enzyme 2 [Sus scrofa]	sp|Q5R440|CALX_PONAB	1	0.971925	1.39973	1.16979	0.998663
gi|350590514|ref|XP_003131675.3| PREDICTED: retinoid-inducible serine carboxypeptidase [Sus scrofa]	sp|O19094|OCTC_BOVIN	1	0.681818	0.707792	1.03247	1
gi|311247022|ref|XP_003122449.1| PREDICTED: cadherin-related family member 5 [Sus scrofa]	sp|P36776|LONM_HUMAN	1	0.481415	0.653829	0.657859	1.00224
gi|297632426|ref|NP_001172096.1| signal sequence receptor, alpha [Sus scrofa]	sp|Q35914|ATP8_PIG	1	0.498377	1.15584	1.13149	1.00325
gi|335287650|ref|XP_003126108.2| PREDICTED: TRIO and F-actin-binding protein [Sus scrofa]	sp|Q9WVB1|RAB6A_RAT	1	0.720871	1.16389	0.878361	1.00576
gi|347300387|ref|NP_001231487.1| 60S ribosomal protein L17 [Sus scrofa]	sp|P26373|RL13_HUMAN	1	1.24238	1.6108	0.893352	1.00693
gi|350591502|ref|XP_003483285.1| PREDICTED: ruvB-like 1-like [Sus scrofa]	sp|Q8BZB2|COAC_MOUSE	1	1.53571	1.18436	1.46622	1.00772
gi|47523892|ref|NP_999584.1| epithelial cell adhesion molecule precursor [Sus scrofa] >gi|75045149|sp|Q75QW1.1|EPCAM_PIG RecName: Full=Epithelial cell adhesion molecule; Short=Ep-CAM; AltName: Full=Tumor-associated calcium signal transducer 1; AltName: CD_antigen=CD326; Flags:	sp|P24534|EF1B_HUMAN	1	2.05121	1.34771	1.16981	1.01617
gi|65936|pir||DEPGC 3-hydroxyacyl-CoA dehydrogenase (EC 1.1.1.35), short chain-specific - pig	sp|Q8R164|BPHL_MOUSE	1	1.73678	0.875	0.902644	1.01803
gi|335296435|ref|XP_003357777.1| PREDICTED: cytoplasmic aconitate hydratase [Sus scrofa]	sp|Q9Y224|CN166_HUMAN	1	1.83962	0.95283	1.02594	1.02241
gi|350586543|ref|XP_003482212.1| PREDICTED: glutamate--cysteine ligase catalytic subunit isoform 2 [Sus scrofa]	sp|O88487|DC1I2_MOUSE	1	1.54777	1.88535	1.91879	1.03025
gi|62511144|sp|Q764M5.1|STAT1_PIG RecName: Full=Signal transducer and activator of transcription 1 >gi|47523306|ref|NP_998934.1| signal transducer and activator of transcription 1 [Sus scrofa] >gi|40363629|dbj|BAD06318.1| signal transducer and activator of transcription 1 [Sus scrof	sp|O35737|HNRH1_MOUSE	1	1.22213	1.17304	1.19135	1.03245
gi|1907268|emb|CAA62960.1| proteasome subunit C9-like protein [Sus scrofa]	sp|P83565|RM40_RAT	1	1.97278	1.26679	1.94192	1.03811
gi|47523794|ref|NP_999534.1| voltage-dependent anion-selective channel protein 2 [Sus scrofa] >gi|75050405|sp|Q9MZ15.1|VDAC2_PIG RecName: Full=Voltage-dependent anion-selective channel protein 2; Short=VDAC-2 >gi|8745554|gb|AAF78964.1|AF268462_1 voltage-dependent anion channel	sp|P57113|MAAI_RAT	1	1.68144	1.23546	1.1108	1.03878
gi|17467354|gb|AAL40161.1|L77887_1 lactoferrin, partial [Sus scrofa]	sp|P84091|AP2M1_MOUSE	1	0.672	0.64	0.692	1.04
gi|335309593|ref|XP_003361696.1| PREDICTED: 39S ribosomal protein L12, mitochondrial-like, partial [Sus scrofa]	sp|Q5EA61|KCRB_BOVIN	1	0.347186	1.70043	0.865801	1.05022
gi|335301749|ref|XP_001925115.3| PREDICTED: inorganic pyrophosphatase [Sus scrofa]	sp|Q66H71|CPPED_RAT	1	1.44606	1.37609	1.31195	1.05102
gi|166796061|ref|NP_001107756.1| 60S ribosomal protein L5 [Sus scrofa] >gi|164598076|gb|ABY61325.1| ribosomal protein L5 [Sus scrofa]	sp|P63001|RAC1_MOUSE	1	0.586569	1.16055	0.714586	1.06191
gi|350595577|ref|XP_003484136.1| PREDICTED: spermine synthase [Sus scrofa]	sp|P07954|FUMH_HUMAN	1	1.18436	0.836872	0.87486	1.06257
gi|122143720|sp|Q19QT7.1|CGL_PIG RecName: Full=Cystathionine gamma-lyase; AltName: Full=Cysteine-protein sulfhydrase; AltName: Full=Gamma-cystathionase >gi|113205776|ref|NP_001038050.1| cystathionine gamma-lyase [Sus scrofa] >gi|104295139|gb|ABF72039.1| cystathionase [Sus scrofa]	sp|Q99598|TSNAX_HUMAN	1	1.49088	1.04745	1.38139	1.06569
gi|350588026|ref|XP_003129409.3| PREDICTED: heterogeneous nuclear ribonucleoprotein D-like, partial [Sus scrofa]	sp|O14818|PSA7_HUMAN	1	0.879388	2.11251	1.24482	1.06661
gi|350580065|ref|XP_003122766.3| PREDICTED: syntaxin-3-like, partial [Sus scrofa]	sp|P62316|SMD2_HUMAN	1	0.719481	0.87013	0.727273	1.07013
gi|335283403|ref|XP_003123930.2| PREDICTED: lamin-B1 [Sus scrofa]	sp|P23193|TCEA1_HUMAN	1	0.672753	1.22753	0.939607	1.07022
gi|311268173|ref|XP_003131919.1| PREDICTED: myb-binding protein 1A [Sus scrofa]	sp|Q17QK3|CBPQ_BOVIN	1	1.80435	1.7487	1.70957	1.0713
gi|295444972|ref|NP_001171396.1| alpha-galactosidase A [Sus scrofa] >gi|188998336|gb|ACD67895.1| alpha-galactosidase A [Sus scrofa] >gi|188998339|gb|ACD67896.1| alpha-galactosidase A [Sus scrofa]	sp|P62839|UB2D2_RAT	1	1.53365	1.04327	1.31731	1.07212
gi|47523730|ref|NP_999500.1| tropomyosin alpha-4 chain [Sus scrofa] >gi|54039746|sp|P67937.3|TPM4_PIG RecName: Full=Tropomyosin alpha-4 chain; AltName: Full=Tropomyosin-4 >gi|3661527|gb|AAC61744.1| tropomyosin 4 [Sus scrofa] >gi|262263207|dbj|BAI48106.1| tropomyosin 4 [Sus scro	sp|Q99757|THIOM_HUMAN	1	0.41448	0.81991	0.80905	1.0724
gi|346421314|ref|NP_001231042.1| fibrinogen beta chain precursor [Sus scrofa]	sp|P61006|RAB8A_HUMAN	1	0.782383	0.943005	0.766839	1.07254
gi|350579945|ref|XP_003480721.1| PREDICTED: barrier-to-autointegration factor-like [Sus scrofa] >gi|335281491|ref|XP_003353819.1| PREDICTED: barrier-to-autointegration factor-like [Sus scrofa] >gi|335281487|ref|XP_003353817.1| PREDICTED: barrier-to-autointegration factor-like [Sus	sp|Q8CG45|ARK72_RAT	1	0.541195	0.560582	0.510501	1.07916
gi|335285134|ref|XP_003354782.1| PREDICTED: charged multivesicular body protein 3-like isoform 2 [Sus scrofa]	sp|B2RY56|RBM25_MOUSE	1	0.582566	1.42948	1.15663	1.08434
gi|350580873|ref|XP_003123770.3| PREDICTED: ras GTPase-activating-like protein IQGAP2-like [Sus scrofa]	sp|P08426|TRY3_RAT	1	1.35067	0.998206	1.16233	1.087
gi|350595984|ref|XP_003360563.2| PREDICTED: glucose-6-phosphate 1-dehydrogenase-like, partial [Sus scrofa]	sp|Q9WTM5|RUVB2_MOUSE	1	1.83276	1.13746	1.42726	1.0882
gi|350590718|ref|XP_003131850.3| PREDICTED: bleomycin hydrolase-like [Sus scrofa]	sp|Q3T0W4|PP1R7_BOVIN	1	0.532357	1.65629	1.1453	1.08852
gi|47523756|ref|NP_999514.1| pyruvate carboxylase, mitochondrial [Sus scrofa] >gi|300632138|emb|CBU89073.1| unnamed protein product [Sus scrofa] >gi|300628626|emb|CBU85988.1| unnamed protein product [Sus scrofa] >gi|300641281|emb|CBU93285.1| unnamed protein product [Sus scrofa]	sp|O95486|SC24A_HUMAN	1	1.95142	2.86917	1.25712	1.09262
gi|349732227|ref|NP_001231859.1| heterogeneous nuclear ribonucleoprotein M [Sus scrofa]	sp|Q12931|TRAP1_HUMAN	1	1.55707	0.917277	1.16963	1.09529
gi|311245734|ref|XP_003121939.1| PREDICTED: hypothetical protein LOC100038023 [Sus scrofa] >gi|311245732|ref|XP_003121938.1| PREDICTED: hypothetical protein LOC100038023 [Sus scrofa]	sp|P97881|MUC13_RAT	1	1.82366	1.42411	1.6875	1.09598
gi|345199288|ref|NP_001230831.1| protein phosphatase 1, regulatory (inhibitor) subunit 7 [Sus scrofa]	sp|P39023|RL3_HUMAN	1	2.8672	1.68792	2.48606	1.10226
gi|335286747|ref|XP_001924678.3| PREDICTED: hepatoma-derived growth factor-like [Sus scrofa]	sp|P02676|FIBB_BOVIN	1	0.542149	1.27273	1.08347	1.10248
gi|356461003|ref|NP_001238977.1| RNA-binding protein EWS [Sus scrofa] >gi|351738726|gb|AEQ61463.1| EWS [Sus scrofa]	sp|Q64591|DECR_RAT	1	0.573427	1.5812	1.41181	1.10334
gi|350590115|ref|XP_003131204.3| PREDICTED: RING finger protein 213-like, partial [Sus scrofa]	sp|Q3T0F4|RS10_BOVIN	1	0.753582	0.903295	1.73424	1.1053
gi|1236646|gb|AAC48775.1| ch4 and secrete domains of swine IgM [Sus scrofa]	sp|P55096|ABCD3_MOUSE	1	2.27201	0.968553	1.82075	1.10692
gi|21585985|gb|AAM55495.1| MHC class I antigen [Sus scrofa]	sp|O75964|ATP5L_HUMAN	1	0.64573	0.937897	1.37615	1.10797
gi|311244872|ref|XP_003121596.1| PREDICTED: creatine kinase U-type, mitochondrial-like isoform 2 [Sus scrofa] >gi|311244870|ref|XP_003121595.1| PREDICTED: creatine kinase U-type, mitochondrial-like isoform 1 [Sus scrofa]	sp|P30626|SORCN_HUMAN	1	1.42062	1.75312	2.16708	1.10889
gi|346716314|ref|NP_001231169.1| Rho GDP dissociation inhibitor (GDI) beta [Sus scrofa]	sp|Q00688|FKBP3_HUMAN	1	2.12138	1.2971	1.0471	1.11051
gi|350597081|ref|XP_003484354.1| PREDICTED: LOW QUALITY PROTEIN: apolipoprotein B-100 [Sus scrofa]	sp|P07846|DHSO_SHEEP	1	2.07746	0.996532	1.50058	1.11214
gi|335281222|ref|XP_003353764.1| PREDICTED: probable 2-ketogluconate reductase-like isoform 2 [Sus scrofa]	sp|Q63945|SET_RAT	1	1.33914	0.723861	0.789544	1.11528
gi|2500494|sp|Q29308.3|RS19_PIG RecName: Full=40S ribosomal protein S19	sp|P62151|CALM_TORCA	1	0.923221	1.77341	1.27528	1.11985
gi|335294004|ref|XP_003357107.1| PREDICTED: CDGSH iron-sulfur domain-containing protein 2-like [Sus scrofa]	sp|Q61029|LAP2B_MOUSE	1	1.55281	1.33333	1.20297	1.12046
gi|178056596|ref|NP_001116608.1| U6 snRNA-associated Sm-like protein LSm2 [Sus scrofa] >gi|147225158|emb|CAN13335.1| LSM2 homolog, U6 small nuclear RNA associated (S. cerevisiae) [Sus scrofa]	sp|Q60866|PTER_MOUSE	1	0.675904	1.68313	1.12892	1.12048
gi|350591186|ref|XP_003483226.1| PREDICTED: mitochondrial carnitine/acylcarnitine carrier protein-like [Sus scrofa]	sp|Q9NX63|CHCH3_HUMAN	1	2.12263	0.933506	1.35751	1.1209
gi|347543795|ref|NP_001231558.1| phospholipase B-like 1 precursor [Sus scrofa]	sp|Q6P502|TCPG_RAT	1	0.778846	0.990385	1.20192	1.125
gi|311260243|ref|XP_001927987.2| PREDICTED: protein CutA isoform 1 [Sus scrofa]	sp|Q8BP92|RCN2_MOUSE	1	0.342258	0.980366	0.920571	1.12628
gi|345091084|ref|NP_001230758.1| RNA binding motif protein 25 [Sus scrofa]	sp|Q2T9R6|NIT2_BOVIN	1	0.609296	1.34132	0.888163	1.12927
gi|311260172|ref|XP_003128373.1| PREDICTED: antigen peptide transporter 2 [Sus scrofa]	sp|P38159|RBMX_HUMAN	1	1.48219	1.34338	2.06941	1.13333
gi|350539097|ref|NP_001233144.1| ubiquitin/ISG15-conjugating enzyme E2 L6 [Sus scrofa] >gi|332113317|gb|AEE02035.1| ubiquitin-conjugating enzyme E2L 6 [Sus scrofa]	sp|Q61599|GDIR2_MOUSE	1	0.856575	1.0278	2.0203	1.13857
gi|311247240|ref|XP_003122553.1| PREDICTED: splicing factor 3B subunit 2 [Sus scrofa]	sp|Q5R7L7|RAB5C_PONAB	1	0.515591	1.06599	1.02901	1.14358
gi|350583566|ref|XP_001925705.3| PREDICTED: seryl-tRNA synthetase, cytoplasmic [Sus scrofa]	sp|P49130|LAMP2_CRIGR	1	1.90363	1.23016	1.23923	1.14399
gi|311255134|ref|XP_003126086.1| PREDICTED: 2-amino-3-ketobutyrate coenzyme A ligase, mitochondrial-like isoform 1 [Sus scrofa] >gi|311255118|ref|XP_003126081.1| PREDICTED: 2-amino-3-ketobutyrate coenzyme A ligase, mitochondrial-like isoform 1 [Sus scrofa]	sp|P54136|SYRC_HUMAN	1	1.59143	0.513062	0.702194	1.14629
gi|350583728|ref|XP_003126027.3| PREDICTED: protein kinase C and casein kinase substrate in neurons protein 2-like [Sus scrofa]	sp|Q91X97|NCALD_MOUSE	1	0.643389	0.83054	0.675047	1.14804
gi|311248247|ref|XP_003123039.1| PREDICTED: ATP synthase subunit delta, mitochondrial-like isoform 1 [Sus scrofa]	sp|P20618|PSB1_HUMAN	1	0.432336	0.92094	1.17521	1.14815
gi|311260957|ref|XP_003128592.1| PREDICTED: NEDD8-like [Sus scrofa]	sp|Q08752|PPID_HUMAN	1	0.519531	2.07682	1.82292	1.14974
gi|350590194|ref|XP_003483009.1| PREDICTED: 26S proteasome non-ATPase regulatory subunit 12-like [Sus scrofa]	sp|P55327|TPD52_HUMAN	1	2.18698	1.46912	1.82805	1.15192
gi|297591969|ref|NP_001172062.1| ubiquitin-conjugating enzyme E2 L3 [Sus scrofa] >gi|219563058|gb|ACL27888.1| ubiquitin-conjugating enzyme E2L 3 [Sus scrofa]	sp|O43765|SGTA_HUMAN	1	0.77662	0.873264	0.895255	1.15509
gi|311247012|ref|XP_003122436.1| PREDICTED: epidermal growth factor receptor kinase substrate 8-like protein 2-like [Sus scrofa]	sp|P62963|PROF1_RAT	1	0.613501	1.29988	0.738949	1.15591
gi|335292368|ref|XP_001926489.3| PREDICTED: calcium and integrin-binding protein 1 [Sus scrofa]	sp|P25685|DNJB1_HUMAN	1	1.52874	1.18555	1.04433	1.15599
gi|311257796|ref|XP_003127291.1| PREDICTED: SUMO-activating enzyme subunit 1-like isoform 1 [Sus scrofa]	sp|Q76LV1|HS90B_BOVIN	1	1.13883	1.32037	1.50343	1.15713
gi|350578790|ref|XP_003121632.3| PREDICTED: calcium-binding protein p22-like [Sus scrofa]	sp|Q9WV85|NDK3_MOUSE	1	0.804196	0.546454	0.737263	1.16084
gi|350578774|ref|XP_003480447.1| PREDICTED: EH domain-containing protein 4, partial [Sus scrofa]	sp|P28070|PSB4_HUMAN	1	1.21885	1.73962	1.89936	1.16134
gi|50657386|ref|NP_001002801.1| apolipoprotein C-III precursor [Sus scrofa] >gi|416627|sp|P27917.2|APOC3_PIG RecName: Full=Apolipoprotein C-III; Short=Apo-CIII; Short=ApoC-III; AltName: Full=Apolipoprotein C3; Flags: Precursor >gi|164361|gb|AAA30993.1| apolipoprotein C-III [Sus sc	sp|Q6A2H1|SSDH_GORGO	1	0.439589	0.465296	0.758355	1.16195
gi|11055649|gb|AAG28195.1|AF304201_6 ATPase 6 [Sus scrofa]	sp|Q3ZCK9|PSA4_BOVIN	1	3.01167	2.43969	1.9572	1.16342
gi|350582454|ref|XP_003125231.3| PREDICTED: LOW QUALITY PROTEIN: leucine-rich PPR motif-containing protein, mitochondrial [Sus scrofa]	sp|Q02819|NUCB1_MOUSE	1	1.17901	0.979381	1.38613	1.16682
gi|194041525|ref|XP_001927836.1| PREDICTED: dihydropyrimidinase-related protein 2-like isoform 2 [Sus scrofa]	sp|P00366|DHE3_BOVIN	1	1.80537	1.35705	1.63087	1.16913
gi|350584261|ref|XP_003481707.1| PREDICTED: ras-related protein Rab-21-like [Sus scrofa]	sp|P30048|PRDX3_HUMAN	1	1.53467	0.934307	1.24453	1.17701
gi|343790870|ref|NP_001230573.1| adaptor-related protein complex 2, mu 1 subunit [Sus scrofa]	sp|Q3ZBV9|DHR11_BOVIN	1	3.10852	0.452997	1.27571	1.17729
gi|83816981|ref|NP_001033050.1| proteasome subunit beta type-9 [Sus scrofa] >gi|311260176|ref|XP_003128374.1| PREDICTED: proteasome subunit beta type-9-like [Sus scrofa] >gi|110276961|gb|ABG57117.1| proteasome beta 9 subunit [Sus scrofa] >gi|83320492|gb|ABC02872.1| proteasome beta	sp|Q8BTI8|SRRM2_MOUSE	1	0.786747	1.11627	1.3988	1.18012
gi|58332862|ref|NP_001011507.1| lysosome-associated membrane glycoprotein 1 precursor [Sus scrofa] >gi|57282794|emb|CAF04757.1| lysosome-associated membrane glycoprotein 1 [Sus scrofa]	sp|Q5XTY7|RL17_FELCA	1	2.71568	0.903784	1.53081	1.18811
gi|335286637|ref|XP_001927783.3| PREDICTED: nitrilase homolog 1 isoform 2 [Sus scrofa]	sp|O75367|H2AY_HUMAN	1	0.525878	1.14695	0.869686	1.19039
gi|350584879|ref|XP_003126924.3| PREDICTED: alanyl-tRNA synthetase, cytoplasmic [Sus scrofa]	sp|P14314|GLU2B_HUMAN	1	1.45079	0.94464	1.10545	1.19069
gi|217039113|gb|ACJ76845.1| HDL binding protein [Sus scrofa]	sp|Q91WQ9|CALL4_MOUSE	1	1.07729	0.753943	0.98817	1.19085
gi|335281676|ref|XP_003353867.1| PREDICTED: heterogeneous nuclear ribonucleoprotein U-like 2 [Sus scrofa]	sp|Q80WJ7|LYRIC_MOUSE	1	1.90077	0.979381	1.68814	1.1933
gi|251764755|sp|A6M931.1|IF4A3_PIG RecName: Full=Eukaryotic initiation factor 4A-III; Short=eIF-4A-III; Short=eIF4A-III; AltName: Full=ATP-dependent RNA helicase DDX48; AltName: Full=ATP-dependent RNA helicase eIF4A-3; AltName: Full=DEAD box protein 48; AltName: Full=Eukaryotic trans	sp|Q6P4A8|PLBL1_HUMAN	1	1.8826	1.29562	1.50636	1.19802
gi|178056623|ref|NP_001116685.1| vesicle-associated membrane protein-associated protein B [Sus scrofa] >gi|160210890|sp|A5GFS8.1|VAPB_PIG RecName: Full=Vesicle-associated membrane protein-associated protein B; Short=VAMP-B; Short=VAMP-associated protein B; Short=VAP-B >gi|147223393	sp|P55145|MANF_HUMAN	1	0.704994	1.00581	0.919861	1.20325
gi|346644866|ref|NP_001231105.1| coiled-coil-helix-coiled-coil-helix domain-containing protein 3, mitochondrial [Sus scrofa]	sp|Q9H0W9|CK054_HUMAN	1	0.480418	1.58486	1.11619	1.20496
gi|350529411|ref|NP_001231937.1| proteasome (prosome, macropain) 26S subunit, ATPase, 2 [Sus scrofa]	sp|Q9Y6U3|ADSV_HUMAN	1	1.16863	0.848039	1.32549	1.20588
gi|264681442|ref|NP_001161116.1| dynactin subunit 6 [Sus scrofa] >gi|262072943|dbj|BAI47779.1| dynactin 6 [Sus scrofa]	sp|Q9NZZ3|CHMP5_HUMAN	1	1.13404	1.08014	1.05461	1.20922
gi|113205666|ref|NP_001038019.1| NADH dehydrogenase 1 beta subcomplex 6 [Sus scrofa] >gi|87047638|gb|ABD18452.1| NADH dehydrogenase 1 beta subcomplex 6 [Sus scrofa]	sp|B0K019|BAG1_RAT	1	1.27697	1.08382	1.40306	1.21429
gi|343790906|ref|NP_001230510.1| calcineurin-like phosphoesterase domain containing 1 [Sus scrofa]	sp|Q6X9Z5|RLA2_HORSE	1	0.489507	0.957117	0.734033	1.21624
gi|345441801|ref|NP_001230874.1| TNF receptor-associated protein 1 [Sus scrofa]	sp|Q15907|RB11B_HUMAN	1	1.71578	1.24765	1.48589	1.2163
gi|335284678|ref|XP_003354674.1| PREDICTED: dnaJ homolog subfamily A member 3, mitochondrial isoform 1 [Sus scrofa]	sp|Q9D0L7|ARM10_MOUSE	1	1.95907	1.26881	1.1792	1.21681
gi|350579011|ref|XP_003121807.3| PREDICTED: acidic leucine-rich nuclear phosphoprotein 32 family member A-like [Sus scrofa]	sp|Q2NKU6|DPY30_BOVIN	1	0.374113	1.59929	0.907801	1.22163
gi|350583507|ref|XP_003481532.1| PREDICTED: cold shock domain-containing protein E1-like [Sus scrofa]	sp|P62310|LSM3_HUMAN	1	0.679438	1.12899	0.97318	1.22222
gi|4809241|gb|AAD30159.1| hypoxanthine phosphoribosyltransferase [Sus scrofa]	sp|P52272|HNRPM_HUMAN	1	1.38532	1.80505	2.06881	1.22248
gi|335293128|ref|XP_003128866.2| PREDICTED: alpha-adducin [Sus scrofa]	sp|P46953|3HAO_RAT	1	0.658367	1.25299	0.883466	1.2241
gi|350593080|ref|XP_001927062.4| PREDICTED: LOW QUALITY PROTEIN: uncharacterized protein C10orf118 [Sus scrofa]	sp|Q9MZD9|KAPCA_SHEEP	1	1.02363	1.16768	1.55412	1.22485
gi|264681460|ref|NP_001161124.1| acyl carrier protein, mitochondrial [Sus scrofa] >gi|262204908|dbj|BAI48034.1| NADH dehydrogenase (ubiquinone) 1, alpha/beta subcomplex, 1, 8kDa [Sus scrofa]	sp|Q5R7P1|AGR2_PONAB	1	0.683866	1.0344	1.07944	1.22604
gi|311272290|ref|XP_003133380.1| PREDICTED: CDKN2A-interacting protein isoform 1 [Sus scrofa]	sp|Q4R3M6|NDUS5_MACFA	1	0.534839	1.48198	1.72609	1.23498
gi|311274849|ref|XP_001925742.2| PREDICTED: regulation of nuclear pre-mRNA domain-containing protein 1B [Sus scrofa]	sp|P20290|BTF3_HUMAN	1	0.541735	1.18903	0.843699	1.23568
gi|311249625|ref|XP_003123708.1| PREDICTED: FAS-associated factor 2 [Sus scrofa]	sp|P35998|PRS7_HUMAN	1	1.62806	1.08241	1.16147	1.24388
gi|347300207|ref|NP_001231417.1| nucleobindin-1 precursor [Sus scrofa]	sp|P49441|INPP_HUMAN	1	0.967554	1.22713	1.28164	1.24594
gi|350583843|ref|XP_003126114.3| PREDICTED: myosin-9 [Sus scrofa]	sp|Q9CQ40|RM49_MOUSE	1	0.672852	1.14355	1.09766	1.24805
gi|47523790|ref|NP_999531.1| serine/threonine-protein phosphatase 2A catalytic subunit alpha isoform [Sus scrofa] >gi|54038797|sp|P67776.1|PP2AA_PIG RecName: Full=Serine/threonine-protein phosphatase 2A catalytic subunit alpha isoform; Short=PP2A-alpha >gi|164296|gb|AAA30981.1|	sp|Q13492|PICAL_HUMAN	1	1.70845	1.06122	1.01166	1.2551
gi|335282824|ref|XP_003123501.2| PREDICTED: ilvB (bacterial acetolactate synthase)-like [Sus scrofa]	sp|P36871|PGM1_HUMAN	1	1.74376	1.00915	1.07321	1.25707
gi|47522692|ref|NP_999062.1| long-chain specific acyl-CoA dehydrogenase, mitochondrial precursor [Sus scrofa] >gi|2829676|sp|P79274.1|ACADL_PIG RecName: Full=Long-chain specific acyl-CoA dehydrogenase, mitochondrial; Short=LCAD; Flags: Precursor >gi|1695729|dbj|BAA13965.1| long	sp|O14933|UB2L6_HUMAN	1	0.564581	0.813582	0.88016	1.25965
gi|350583937|ref|XP_003355432.2| PREDICTED: LIM domain and actin-binding protein 1-like [Sus scrofa]	sp|Q9UBF2|COPG2_HUMAN	1	0.433582	1.12731	0.920429	1.26372
gi|311257281|ref|XP_003127042.1| PREDICTED: dnaJ homolog subfamily A member 2-like [Sus scrofa]	sp|P26040|EZRI_MOUSE	1	1.30623	2.16609	1.79758	1.26471
gi|311251005|ref|XP_003124395.1| PREDICTED: TSC22 domain family protein 4-like [Sus scrofa] >gi|311251027|ref|XP_003124405.1| PREDICTED: TSC22 domain family protein 4-like [Sus scrofa]	sp|P31976|EZRI_BOVIN	1	0.661202	0.800156	0.697112	1.26542
gi|335309460|ref|XP_003361646.1| PREDICTED: nucleolar protein 56-like, partial [Sus scrofa]	sp|Q8N1P7|AIM1L_HUMAN	1	0.325461	1.34719	1.66226	1.26594
gi|335309807|ref|XP_003361778.1| PREDICTED: delta-aminolevulinic acid dehydratase-like, partial [Sus scrofa]	sp|P70569|MYO5B_RAT	1	0.643815	0.825633	0.981371	1.26602
gi|311254317|ref|XP_001927973.2| PREDICTED: cingulin-like [Sus scrofa]	sp|Q99KE1|MAOM_MOUSE	1	0.628571	0.974286	1.11143	1.27286
gi|385862179|ref|NP_001245364.1| protein diaphanous homolog 1 [Sus scrofa]	sp|A0JPM9|EIF3J_RAT	1	0.745938	0.637371	0.828656	1.27363
gi|343887362|ref|NP_001230582.1| small nuclear ribonucleoprotein Sm D2 [Sus scrofa]	sp|Q9EQP2|EHD4_MOUSE	1	0.952282	1.73029	1.64834	1.2749
gi|122220|sp|P17630.1|TCO1_PIG RecName: Full=Transcobalamin-1; Short=TC-1; AltName: Full=Cobalophilin; AltName: Full=Haptocorrin; AltName: Full=Protein R; AltName: Full=Transcobalamin I; Short=TC I; Short=TCI; Flags: Precursor >gi|1964|emb|CAA36800.1| unnamed protein product [Sus	sp|Q5R7F0|CHP1_PONAB	1	0.834746	0.793079	1.07698	1.28107
gi|194037005|ref|XP_001928988.1| PREDICTED: ribonuclease UK114-like isoform 1 [Sus scrofa]	sp|O97758|ZO1_CANFA	1	0.519608	0.87632	0.887632	1.28205
gi|350581931|ref|XP_003354725.2| PREDICTED: isoleucyl-tRNA synthetase, cytoplasmic-like [Sus scrofa]	sp|Q8HY67|AN32A_CANFA	1	1.79225	1.1954	1.62212	1.28355
gi|311244324|ref|XP_001925172.2| PREDICTED: NEDD9-interacting protein with calponin homology and LIM domains isoform 1 [Sus scrofa]	sp|P48644|AL1A1_BOVIN	1	1.14454	1.17404	1.26136	1.28378
gi|251823933|ref|NP_001156532.1| cadherin-1 precursor [Sus scrofa] >gi|209875157|gb|ACI94878.1| E-cadherin [Sus scrofa]	sp|Q9UFN0|NPS3A_HUMAN	1	1.67114	1.65772	1.49888	1.28412
gi|350591288|ref|XP_003483241.1| PREDICTED: filamin-B [Sus scrofa]	sp|Q9UFN0|NPS3A_HUMAN	1	0.755537	1.17973	1.13799	1.28961
gi|166796059|ref|NP_001107755.1| aminoacyl tRNA synthase complex-interacting multifunctional protein 1 [Sus scrofa] >gi|164598078|gb|ABY61326.1| small inducible cytokine subfamily E member 1 [Sus scrofa]	sp|Q5R6J0|ECM29_PONAB	1	1.1225	1.10488	1.09207	1.28983
gi|311270597|ref|XP_003132922.1| PREDICTED: 26S proteasome non-ATPase regulatory subunit 9-like [Sus scrofa]	sp|P54116|STOM_MOUSE	1	0.492713	0.770179	0.997197	1.29092
gi|350588052|ref|XP_003357166.2| PREDICTED: importin-7, partial [Sus scrofa]	sp|Q96SI9|STRBP_HUMAN	1	1.76846	1.10878	1.79541	1.29641
gi|190360605|ref|NP_001121929.1| pre-mRNA-processing factor 19 [Sus scrofa] >gi|356995561|dbj|BAL14717.1| nuclear matrix protein 200 [Sus scrofa] >gi|171920012|gb|ACB59178.1| pre-mRNA processing factor 19 [Sus scrofa]	sp|P07823|GRP78_MESAU	1	1.7001	1.51469	1.74164	1.29686
gi|343403848|ref|NP_001230297.1| phosphopantothenoylcysteine decarboxylase [Sus scrofa]	sp|Q8VCW4|UN93B_MOUSE	1	0.513454	0.80615	0.959912	1.29764
gi|335281589|ref|XP_003353840.1| PREDICTED: 1-phosphatidylinositol-4,5-bisphosphate phosphodiesterase beta-3 isoform 2 [Sus scrofa]	sp|O75531|BAF_HUMAN	1	1.22552	1.14948	1.13287	1.3007
gi|347582660|ref|NP_001231584.1| mesencephalic astrocyte-derived neurotrophic factor precursor [Sus scrofa] >gi|350591263|ref|XP_003483237.1| PREDICTED: mesencephalic astrocyte-derived neurotrophic factor [Sus scrofa] >gi|306563669|gb|ADN03186.1| mesencephalic astrocyte-derived neu	sp|Q9Z315|SNUT1_MOUSE	1	0.588144	1.24181	1.07332	1.30265
gi|348605151|ref|NP_001231720.1| hydroxysteroid (17-beta) dehydrogenase 3 [Sus scrofa]	sp|Q08849|STX3_RAT	1	0.761831	0.830101	1.12335	1.30566
gi|335284508|ref|XP_003124605.2| PREDICTED: mu-crystallin homolog [Sus scrofa]	sp|Q15293|RCN1_HUMAN	1	1.86867	1.01551	1.20579	1.30714
gi|227430407|ref|NP_001153087.1| keratin, type II cytoskeletal 8 [Sus scrofa]	sp|Q3MHQ0|USH1C_BOVIN	1	0.961538	1.60923	1.09077	1.30769
gi|385137156|ref|NP_001245232.1| kinectin 1 (kinesin receptor) [Sus scrofa]	sp|Q9JI85|NUCB2_RAT	1	0.94308	1.41406	1.37835	1.30804
gi|345100481|pdb|1C9P|A Chain A, Complex Of Bdellastasin With Porcine Trypsin >gi|3318722|pdb|1AN1|E Chain E, Leech-Derived Tryptase InhibitorTRYPSIN COMPLEX	sp|P39054|DYN2_MOUSE	1	1.1312	2.0384	1.256	1.3088
gi|350592508|ref|XP_001925814.4| PREDICTED: putative phospholipase B-like 2-like isoform 1 [Sus scrofa]	sp|Q92945|FUBP2_HUMAN	1	1.35961	1.01478	1.08867	1.31034
gi|350579323|ref|XP_003122006.3| PREDICTED: retinal dehydrogenase 1-like, partial [Sus scrofa]	sp|Q15424|SAFB1_HUMAN	1	1.0118	1.82929	1.25121	1.31228
gi|311247353|ref|XP_003122594.1| PREDICTED: N-acetylated alpha-linked acidic dipeptidase-like 1 [Sus scrofa]	sp|Q0VG18|CS077_MOUSE	1	0.681239	1.16272	1.04068	1.31573
gi|350592642|ref|XP_003483508.1| PREDICTED: T-cell receptor beta chain T17T-22-like [Sus scrofa]	sp|Q6PEC1|TBCA_RAT	1	0.777778	1.00556	1.58333	1.32222
gi|311274576|ref|XP_003134384.1| PREDICTED: small nuclear ribonucleoprotein-associated protein B~-like [Sus scrofa]	sp|Q3UQ44|IQGA2_MOUSE	1	0.823906	1.27748	1.14621	1.32978
gi|350580630|ref|XP_003123158.3| PREDICTED: far upstream element-binding protein 2-like [Sus scrofa]	sp|Q3UQ44|IQGA2_MOUSE	1	0.808408	1.51892	1.21982	1.33033
gi|347658999|ref|NP_001231625.1| uncharacterized protein LOC100512671 [Sus scrofa]	sp|Q56K14|RLA1_BOVIN	1	0.570568	0.639415	1.19793	1.33133
gi|311259388|ref|XP_003128071.1| PREDICTED: cytochrome b-c1 complex subunit 6, mitochondrial-like [Sus scrofa]	sp|P27046|MA2A1_MOUSE	1	0.827265	0.471393	0.774979	1.33233
gi|194036463|ref|XP_001928684.1| PREDICTED: ras-related protein Rap-1A isoform 1 [Sus scrofa] >gi|335287176|ref|XP_003355289.1| PREDICTED: ras-related protein Rap-1A isoform 2 [Sus scrofa]	sp|P49419|AL7A1_HUMAN	1	1.47826	0.841137	1.36957	1.33779
gi|347922148|ref|NP_001231673.1| charged multivesicular body protein 5 [Sus scrofa]	sp|Q8K310|MATR3_MOUSE	1	0.741621	0.953077	1.12553	1.34065
gi|350581149|ref|XP_003480971.1| PREDICTED: matrin-3 [Sus scrofa] >gi|350581147|ref|XP_003480970.1| PREDICTED: matrin-3 [Sus scrofa] >gi|335283551|ref|XP_003354341.1| PREDICTED: matrin-3 [Sus scrofa] >gi|311250254|ref|XP_003124025.1| PREDICTED: matrin-3 isoform 1 [Sus scrofa]	sp|Q8CGF7|TCRG1_MOUSE	1	0.416727	1.124	0.876	1.34582
gi|5542425|pdb|1QPW|D Chain D, Crystal Structure Determination Of Porcine Hemoglobin At 1.8a Resolution >gi|5542423|pdb|1QPW|B Chain B, Crystal Structure Determination Of Porcine Hemoglobin At 1.8a Resolution >gi|809285|pdb|2PGH|D Chain D, Structure Determination Of Aquo	sp|O08784|TCOF_MOUSE	1	3.47486	1.88082	1.58659	1.34637
gi|350592919|ref|XP_001924466.4| PREDICTED: neutral ceramidase [Sus scrofa]	sp|P62880|GBB2_MOUSE	1	1.23697	1.12159	1.5794	1.35112
gi|311254645|ref|XP_003125912.1| PREDICTED: EPS8-like 3 [Sus scrofa]	sp|Q9Y2V2|CHSP1_HUMAN	1	1.90438	1.54582	1.65339	1.35458
gi|350595031|ref|XP_003360089.2| PREDICTED: double-stranded RNA-binding protein Staufen homolog 1 [Sus scrofa]	sp|Q60HD6|PMM2_MACFA	1	0.947214	1.04106	1.21554	1.35484
gi|350593954|ref|XP_003133749.3| PREDICTED: arf-GAP domain and FG repeats-containing protein 1-like [Sus scrofa]	sp|Q9H0X4|ITFG3_HUMAN	1	0.858103	1.12323	1.60941	1.35698
gi|47523870|ref|NP_999573.1| peroxiredoxin-6 [Sus scrofa] >gi|75074817|sp|Q9TSX9.3|PRDX6_PIG RecName: Full=Peroxiredoxin-6; AltName: Full=Non-selenium glutathione peroxidase; Short=NSGPx >gi|6689393|emb|CAB65456.1| non-selenium glutathione phospholipid hydroperoxide peroxidase	sp|Q13087|PDIA2_HUMAN	1	1.21077	1.40602	1.32847	1.36679
gi|47523456|ref|NP_999349.1| serine/threonine-protein phosphatase PP1-beta catalytic subunit [Sus scrofa] >gi|47116968|sp|P61292.3|PP1B_PIG RecName: Full=Serine/threonine-protein phosphatase PP1-beta catalytic subunit; Short=PP-1B >gi|89257972|gb|ABD65256.1| protein phosphatase	sp|Q8BU30|SYIC_MOUSE	1	1.56041	1.33142	1.65708	1.37054
gi|350589126|ref|XP_003482792.1| PREDICTED: nucleoprotein TPR [Sus scrofa]	sp|Q9NZB2|F120A_HUMAN	1	1.27386	1.10788	1.38174	1.37483
gi|350581743|ref|XP_003481100.1| PREDICTED: phosphomannomutase 2-like, partial [Sus scrofa]	sp|Q8CHG3|GCC2_MOUSE	1	1.01651	0.949541	1.07339	1.37615
gi|47523694|ref|NP_999483.1| calpain small subunit 1 [Sus scrofa] >gi|115613|sp|P04574.1|CPNS1_PIG RecName: Full=Calpain small subunit 1; Short=CSS1; AltName: Full=Calcium-activated neutral proteinase small subunit; Short=CANP small subunit; AltName: Full=Calcium-dependent prot	sp|O75643|U520_HUMAN	1	2.21981	1.89164	2.49536	1.39009
gi|350276234|ref|NP_001231897.1| anterior gradient protein 2 homolog precursor [Sus scrofa]	sp|P06309|KV205_HUMAN	1	1.86858	1.69815	1.54415	1.3963
gi|311249255|ref|XP_003123541.1| PREDICTED: procollagen galactosyltransferase 1-like [Sus scrofa]	sp|Q8CAQ8|IMMT_MOUSE	1	2.77135	2.30028	1.53719	1.4022
gi|120525|sp|P19133.1|FRIL_PIG RecName: Full=Ferritin light chain; Short=Ferritin L subunit	sp|Q4R5C2|RL7A_MACFA	1	0.41925	0.761011	1.98858	1.40321
gi|335283574|ref|XP_003354345.1| PREDICTED: transcriptional activator protein Pur-alpha isoform 2 [Sus scrofa] >gi|335283572|ref|XP_003354344.1| PREDICTED: transcriptional activator protein Pur-alpha isoform 1 [Sus scrofa]	sp|O08788|DCTN1_MOUSE	1	1.53195	1.0836	1.19595	1.40735
gi|350583750|ref|XP_003481579.1| PREDICTED: hsc70-interacting protein-like isoform 1 [Sus scrofa]	sp|Q61464|ZN638_MOUSE	1	0.733141	1.31118	1.03565	1.42775
gi|213021241|ref|NP_001132944.1| proteasome subunit alpha type-6 [Sus scrofa] >gi|210062872|gb|ACJ06406.1| proteasome subunit alpha type 6 [Sus scrofa]	sp|Q9QZ23|NFU1_MOUSE	1	0.651584	1.4178	1.57567	1.42886
gi|350529387|ref|NP_001231927.1| basic transcription factor 3 [Sus scrofa]	sp|Q63810|CANB1_MOUSE	1	0.769285	1.06016	1.13093	1.42958
gi|343488534|ref|NP_001230423.1| homeobox prox 1 [Sus scrofa]	sp|Q80U96|XPO1_RAT	1	1.47109	1.291	1.34692	1.43223
gi|335293690|ref|XP_003129163.2| PREDICTED: general vesicular transport factor p115-like [Sus scrofa]	sp|Q5SGE0|LPPRC_RAT	1	0.768897	1.17897	1.10686	1.43527
gi|68532157|gb|AAY98813.1| proteasome subunit 10 [Sus scrofa] >gi|68532159|gb|AAY98814.1| proteasome subunit 10 [Sus scrofa]	sp|Q8NHH9|ATLA2_HUMAN	1	0.743537	1.0619	1.41361	1.43537
gi|346986456|ref|NP_001231378.1| nucleoside diphosphate kinase 3 isoform 1 precursor [Sus scrofa]	sp|Q7TMA5|APOB_RAT	1	0.798099	1.27414	1.17643	1.4384
gi|335282345|ref|XP_003354038.1| PREDICTED: mitochondrial import inner membrane translocase subunit Tim13-like [Sus scrofa]	sp|O75116|ROCK2_HUMAN	1	0.824515	1.02462	1.17444	1.4395
gi|389618965|gb|AFK92990.1| U2 small nuclear RNA auxiliary factor 2 [Sus scrofa]	sp|P62082|RS7_MOUSE	1	1.51748	1.30769	1.27506	1.44289
gi|351738777|gb|AEQ61487.1| ribokinase [Sus scrofa]	sp|Q29471|ANX13_CANFA	1	1.12919	1.5311	1.7504	1.45534
gi|335282254|ref|XP_003354010.1| PREDICTED: DNA-directed RNA polymerases I, II, and III subunit RPABC1-like isoform 1 [Sus scrofa] >gi|335282256|ref|XP_003354011.1| PREDICTED: DNA-directed RNA polymerases I, II, and III subunit RPABC1-like isoform 2 [Sus scrofa]	sp|Q80X50|UBP2L_MOUSE	1	2.81404	1.54737	2.06667	1.45614
gi|194036902|ref|XP_001927358.1| PREDICTED: prefoldin subunit 2-like [Sus scrofa]	sp|Q8HY81|CATS_CANFA	1	1.37014	1.15409	1.04845	1.46465
gi|350593701|ref|XP_003483747.1| PREDICTED: hypothetical protein LOC100737189 [Sus scrofa]	sp|Q9H4A5|GLP3L_HUMAN	1	0.735202	1.91485	1.7352	1.46729
gi|350580713|ref|XP_003480884.1| PREDICTED: hypothetical protein LOC100737370 [Sus scrofa]	sp|Q91W50|CSDE1_MOUSE	1	0.445359	1.76315	1.22954	1.47462
gi|83921643|ref|NP_001033096.1| serine/arginine-rich splicing factor 1 [Sus scrofa] >gi|114152157|sp|Q3YLA6.3|SRSF1_PIG RecName: Full=Serine/arginine-rich splicing factor 1; AltName: Full=Splicing factor, arginine/serine-rich 1 >gi|73810231|gb|AAZ86089.1| splicing factor arginine/	sp|Q0V8H6|MOV10_BOVIN	1	0.809475	1.16581	1.12461	1.47477
gi|350583523|ref|XP_003481536.1| PREDICTED: putative helicase MOV-10 [Sus scrofa]	sp|Q9GMB8|SYSC_BOVIN	1	1.61611	0.77346	0.740284	1.47962
gi|47522814|ref|NP_999159.1| dihydrolipoyllysine-residue acetyltransferase component of pyruvate dehydrogenase complex, mitochondrial precursor [Sus scrofa] >gi|14587786|dbj|BAB61720.1| dihydrolipoamide acetyltransferase [Sus scrofa]	sp|Q5R3I4|TTC38_HUMAN	1	0.772814	0.88403	1.00095	1.48384
gi|56748897|sp|Q6S4N2.1|HS71B_PIG RecName: Full=Heat shock 70 kDa protein 1B; AltName: Full=Heat shock 70 kDa protein 2; Short=HSP70.2 >gi|47523308|ref|NP_998931.1| heat shock 70 kDa protein 1B [Sus scrofa] >gi|39777368|gb|AAR30953.1| heat shock protein 70.2 [Sus scrofa] >gi|1487249	sp|Q9UNF0|PACN2_HUMAN	1	0.658491	0.679245	0.569811	1.48679
gi|346986466|ref|NP_001231384.1| proteasome (prosome, macropain) subunit, beta type, 4 [Sus scrofa]	sp|Q4R4C9|ARFG3_MACFA	1	0.605845	1.55608	1.24566	1.48894
gi|350594669|ref|XP_001926037.4| PREDICTED: ribosome-binding protein 1 [Sus scrofa]	sp|Q5RF31|F10A1_PONAB	1	0.583333	1.26807	1.19378	1.50301
gi|350590014|ref|XP_003357929.2| PREDICTED: serine/threonine-protein kinase 24 [Sus scrofa]	sp|P35579|MYH9_HUMAN	1	5.30686	2.25993	1.77437	1.50722
gi|311247991|ref|XP_003122917.1| PREDICTED: pyruvate dehydrogenase protein X component-like isoform 1 [Sus scrofa]	sp|Q9ERG0|LIMA1_MOUSE	1	1.05153	1.01145	1.20802	1.50763
gi|311275253|ref|XP_003134650.1| PREDICTED: single-stranded DNA-binding protein, mitochondrial-like isoform 1 [Sus scrofa]	sp|O95678|K2C75_HUMAN	1	0.67284	1.5	1.92901	1.50926
gi|311276634|ref|XP_003135287.1| PREDICTED: mitochondrial import inner membrane translocase subunit Tim8 A-like [Sus scrofa]	sp|Q6PDG5|SMRC2_MOUSE	1	1.16562	1.53459	1.51572	1.50943
gi|335281560|ref|XP_003353830.1| PREDICTED: splicing factor 1 isoform 2 [Sus scrofa]	sp|Q13765|NACA_HUMAN	1	1.25823	1.02157	1.01807	1.51151
gi|308081427|ref|NP_001183950.1| hydroxysteroid dehydrogenase-like protein 2 [Sus scrofa]	sp|Q9UBC5|MYO1A_HUMAN	1	1.85482	1.21151	1.43805	1.51189
gi|194036316|ref|XP_001927895.1| PREDICTED: RNA-binding protein 8A [Sus scrofa]	sp|Q17R06|RAB21_BOVIN	1	1.88488	2.02558	1.73488	1.51977
gi|346644882|ref|NP_001231113.1| reticulocalbin 2, EF-hand calcium binding domain precursor [Sus scrofa]	sp|Q3SZL3|MBOA5_BOVIN	1	0.62413	1.01856	1.27552	1.52146
gi|350588218|ref|XP_003129667.3| PREDICTED: nuclear mitotic apparatus protein 1-like [Sus scrofa]	sp|P10888|COX41_RAT	1	0.875622	1.35075	1.47678	1.52156
gi|350591926|ref|XP_003358845.2| PREDICTED: golgin subfamily B member 1 [Sus scrofa]	sp|Q5RC02|SYAC_PONAB	1	0.954106	1.18357	1.28865	1.5314
gi|213021237|ref|NP_001132943.1| DNA-(apurinic or apyrimidinic site) lyase [Sus scrofa] >gi|210062866|gb|ACJ06403.1| APEX nuclease 1 [Sus scrofa]	sp|P22892|AP1G1_MOUSE	1	1.1932	1.67347	1.03401	1.53333
gi|335309939|ref|XP_003133770.2| PREDICTED: nucleolin-like [Sus scrofa]	sp|Q11136|PEPD_MOUSE	1	0.864337	1.85509	1.71942	1.53649
gi|347300165|ref|NP_001231397.1| proteasome subunit alpha type-4 [Sus scrofa]	sp|Q5RFB3|PEPD_PONAB	1	0.545338	1.72026	1.13248	1.53955
gi|34391575|gb|AAN46746.1| E2 ubiquitin-conjugating enzyme UbcH5B [Sus scrofa]	sp|Q8SPP7|PGRP1_BOVIN	1	1.22981	1.12174	1.02733	1.54534
gi|311258558|ref|XP_003127668.1| PREDICTED: protein DDI1 homolog 2 [Sus scrofa]	sp|Q6URW6|MYH14_MOUSE	1	1.06921	1.45465	0.966587	1.54654
gi|311259030|ref|XP_003127902.1| PREDICTED: small nuclear ribonucleoprotein Sm D1-like [Sus scrofa]	sp|Q6URW6|MYH14_MOUSE	1	0.924765	1.94201	2.37774	1.54702
gi|194033405|ref|XP_001928380.1| PREDICTED: acetyl-CoA acetyltransferase, cytosolic [Sus scrofa]	sp|Q08163|CAP1_RAT	1	1.43429	1.48381	2.22857	1.55238
gi|198282077|ref|NP_001128296.1| cytochrome P450 3A46 [Sus scrofa] >gi|197791176|gb|ABS58488.2| cytochrome P450 [Sus scrofa]	sp|Q5E936|TXD12_BOVIN	1	3.43034	2.74149	2.03406	1.55418
gi|350595677|ref|XP_003360362.2| PREDICTED: GRIP1-associated protein 1 [Sus scrofa]	sp|Q5T447|HECD3_HUMAN	1	1.05954	1.24168	1.66375	1.56743
gi|116175267|ref|NP_001070690.1| U1 small nuclear ribonucleoprotein A [Sus scrofa] >gi|122131847|sp|Q06AA4.1|SNRPA_PIG RecName: Full=U1 small nuclear ribonucleoprotein A; Short=U1 snRNP A; Short=U1-A; Short=U1A >gi|115371743|gb|ABI96196.1| SNRPA [Sus scrofa]	sp|P19468|GSH1_RAT	1	0.966667	0.927083	1.47431	1.57014
gi|169139278|gb|ACA48587.1| liver fatty acid binding protein [Sus scrofa]	sp|Q924C1|XPO5_MOUSE	1	0.622348	2.08487	1.31294	1.57249
gi|2498311|sp|Q28943.1|DPYD_PIG RecName: Full=Dihydropyrimidine dehydrogenase [NADP(+)]; Short=DHPDHase; Short=DPD; AltName: Full=Dihydrothymine dehydrogenase; AltName: Full=Dihydrouracil dehydrogenase; Flags: Precursor >gi|47522904|ref|NP_999209.1| dihydropyrimidine dehydrogenase	sp|Q9JKF1|IQGA1_MOUSE	1	1.61659	1.85538	1.44731	1.57287
gi|339895863|ref|NP_001229960.1| coiled-coil and C2 domain-containing 1A [Sus scrofa]	sp|Q9JIX8|ACINU_MOUSE	1	0.79005	1.91642	1.13831	1.57512
gi|47523784|ref|NP_999528.1| 40S ribosomal protein S12 [Sus scrofa] >gi|1173191|sp|P46405.2|RS12_PIG RecName: Full=40S ribosomal protein S12 >gi|872315|emb|CAA55946.1| 40S ribosomal protein S12 [Sus scrofa]	sp|Q15643|TRIPB_HUMAN	1	1.49735	1.67019	1.78483	1.57672
gi|350583970|ref|XP_003126216.3| PREDICTED: keratin, type II cytoskeletal 75-like [Sus scrofa]	sp|Q14204|DYHC1_HUMAN	1	2.20153	1.72066	0.983418	1.58291
gi|350592614|ref|XP_003483500.1| PREDICTED: splicing factor 3A subunit 1 isoform 1 [Sus scrofa]	sp|P28838|AMPL_HUMAN	1	0.782649	1.45896	1.30131	1.58955
gi|194034199|ref|XP_001928042.1| PREDICTED: proteasome subunit alpha type-3 isoform 2 [Sus scrofa]	sp|Q68FS4|AMPL_RAT	1	0.788539	1.49153	1.43745	1.59161
gi|350582325|ref|XP_003354840.2| PREDICTED: calcineurin subunit B type 1-like [Sus scrofa] >gi|335306878|ref|XP_003125129.2| PREDICTED: calcineurin subunit B type 1-like [Sus scrofa]	sp|P28838|AMPL_HUMAN	1	1.56839	1.48655	1.9148	1.59641
gi|350595424|ref|XP_003484107.1| PREDICTED: chromobox protein homolog 3-like isoform 2 [Sus scrofa] >gi|350595422|ref|XP_003360239.2| PREDICTED: chromobox protein homolog 3-like isoform 1 [Sus scrofa]	sp|Q9H227|GBA3_HUMAN	1	0.873536	1.20843	1.21194	1.6007
gi|311267276|ref|XP_003131485.1| PREDICTED: keratin, type I cytoskeletal 19-like [Sus scrofa]	-	1	1.10723	1.51807	1.59518	1.6012
gi|335310669|ref|XP_003362140.1| PREDICTED: hypothetical protein LOC100622909 [Sus scrofa]	sp|Q5R5P4|RBM47_PONAB	1	1.67626	1.42446	1.27158	1.60432
gi|335288894|ref|XP_003126772.2| PREDICTED: ubiquitin-conjugating enzyme E2 N-like [Sus scrofa]	sp|P08541|UD2B2_RAT	1	1.43087	0.96463	1.21115	1.60665
gi|148232463|ref|NP_001090940.1| methylmalonyl-CoA epimerase, mitochondrial [Sus scrofa] >gi|117660706|gb|ABK55633.1| MCEE [Sus scrofa]	sp|Q9ESE1|LRBA_MOUSE	1	0.987664	1.08635	1.80879	1.61758
gi|343780950|ref|NP_001230488.1| 39S ribosomal protein L40, mitochondrial isoform 1 [Sus scrofa]	sp|P53992|SC24C_HUMAN	1	1.01654	1.62776	1.68566	1.61857
gi|298160923|ref|NP_001177141.1| DDRGK domain-containing protein 1 [Sus scrofa]	sp|P55212|CASP6_HUMAN	1	0.965496	0.842884	1.2138	1.6223
gi|335297595|ref|XP_003358072.1| PREDICTED: interferon-induced 35 kDa protein-like [Sus scrofa]	sp|Q96HC4|PDLI5_HUMAN	1	0.704936	1.04882	1.52575	1.62715
gi|219521990|ref|NP_001137182.1| granzyme B precursor [Sus scrofa] >gi|216408333|gb|ACJ72857.1| granzyme B [Sus scrofa]	sp|Q3UPL0|SC31A_MOUSE	1	0.362637	0.894364	1.00319	1.6285
gi|122064583|sp|P04178.2|SODC_PIG RecName: Full=Superoxide dismutase [Cu-Zn] >gi|298677090|ref|NP_001177351.1| superoxide dismutase [Cu-Zn] [Sus scrofa] >gi|297593564|gb|ADI47520.1| superoxide dismutase 1 [Sus scrofa]	sp|Q9JJ54|HNRPD_RAT	1	0.98163	1.57176	1.95982	1.63261
gi|343887420|ref|NP_001230609.1| transcription elongation factor A protein 1 [Sus scrofa]	sp|O14979|HNRDL_HUMAN	1	0.976873	1.40796	1.12535	1.63691
gi|350589959|ref|XP_003482961.1| PREDICTED: LIM domain only protein 7-like [Sus scrofa]	sp|Q9EPL8|IPO7_MOUSE	1	0.546957	1.62696	1.31913	1.6487
gi|335293186|ref|XP_003356895.1| PREDICTED: grpE protein homolog 1, mitochondrial-like isoform 1 [Sus scrofa]	sp|Q14980|NUMA1_HUMAN	1	1.77243	1.34573	1.22101	1.64989
gi|47116966|sp|P61288.1|TCTP_PIG RecName: Full=Translationally-controlled tumor protein; Short=TCTP >gi|47523802|ref|NP_999538.1| translationally-controlled tumor protein [Sus scrofa] >gi|18482460|gb|AAL68965.1| translationally controlled tumor protein [Sus scrofa]	sp|D3ZJ96|UBP28_RAT	1	1.39876	1.40495	1.57342	1.66461
gi|356460899|ref|NP_999466.2| catalase [Sus scrofa]	sp|Q3TLH4|PRC2C_MOUSE	1	1.1309	1.04245	1.11321	1.66863
gi|113196863|gb|ABI31729.1| low molecular mass protein 7 [Sus scrofa]	sp|O74424|NU211_SCHPO	1	0.920056	1.54371	1.48948	1.6835
gi|346986324|ref|NP_001231316.1| tumor protein D52 [Sus scrofa]	sp|Q91YX5|LGAT1_MOUSE	1	0.764938	1.45043	1.14183	1.68549
gi|346716298|ref|NP_001231025.1| heterogeneous nuclear ribonucleoprotein G [Sus scrofa]	sp|Q8VEK3|HNRPU_MOUSE	1	1.12723	1.73127	1.34245	1.68966
gi|350529421|ref|NP_001231942.1| mitochondrial ribosomal protein L49 [Sus scrofa]	sp|P06800|PTPRC_MOUSE	1	1.34694	1.41565	1.13469	1.69116
gi|47523516|ref|NP_999381.1| inositol monophosphatase 1 [Sus scrofa] >gi|68568737|sp|O77591.1|IMPA1_PIG RecName: Full=Inositol monophosphatase 1; Short=IMP 1; Short=IMPase 1; AltName: Full=Inositol-1(or 4)-monophosphatase 1; AltName: Full=Lithium-sensitive myo-inositol monophos	sp|Q91XA2|GOLM1_MOUSE	1	0.649688	1.10603	1.10083	1.69231
gi|349501107|ref|NP_001231795.1| ribosomal protein, large, P2 [Sus scrofa]	sp|Q5R684|UBQL1_PONAB	1	0.599401	1.05594	1.18581	1.6983
gi|47523158|ref|NP_999015.1| glutathione S-transferase A2 [Sus scrofa] >gi|1185280|emb|CAA93434.1| glutathione S-transferase [Sus scrofa]	sp|Q8JZX4|SPF45_MOUSE	1	2.6012	1.95802	3.13793	1.69865
gi|194037681|ref|XP_001926390.1| PREDICTED: early endosome antigen 1 [Sus scrofa]	sp|Q8WWI1|LMO7_HUMAN	1	0.874172	1.31391	1.32185	1.70464
gi|325652098|ref|NP_001191688.1| nucleoside diphosphate kinase A [Sus scrofa]	sp|P91660|L259_DROME	1	1.27765	2.88488	3.21896	1.71106
gi|415513|gb|AAB28178.1| diazepam-binding inhibitor(32-86); DBI(32-86) [Sus scrofa]	sp|Q99KH8|STK24_MOUSE	1	0.698545	0.589397	0.580042	1.73493
gi|194042314|ref|XP_001928933.1| PREDICTED: ATP-dependent RNA helicase SUPV3L1, mitochondrial [Sus scrofa]	sp|E9Q555|RN213_MOUSE	1	1.22754	1.52729	1.30479	1.73887
gi|311255476|ref|XP_003126249.1| PREDICTED: chromobox protein homolog 5-like isoform 2 [Sus scrofa] >gi|311255478|ref|XP_003126248.1| PREDICTED: chromobox protein homolog 5-like isoform 1 [Sus scrofa]	sp|O00232|PSD12_HUMAN	1	1.19577	2.11127	1.41127	1.74789
gi|222136592|ref|NP_001138374.1| proteasome subunit beta type-3 [Sus scrofa]	sp|P41567|EIF1_HUMAN	1	1.13942	1.96389	1.85958	1.74824
gi|311252785|ref|XP_003125258.1| PREDICTED: serine/arginine-rich splicing factor 7-like isoform 1 [Sus scrofa]	sp|Q920A5|RISC_MOUSE	1	1.61224	1.07289	1.16618	1.7483
gi|356614808|gb|AET25525.1| mitochondrial NADH dehydrogenase Fe-S protein 4 [Sus scrofa]	sp|Q2KI42|PSD11_BOVIN	1	0.73617	1.17872	1.34787	1.75
gi|350581737|ref|XP_003481098.1| PREDICTED: calcium-regulated heat stable protein 1-like [Sus scrofa]	sp|P70645|BLMH_RAT	1	1.05886	1.39749	1.18783	1.75926
gi|350589637|ref|XP_003130870.3| PREDICTED: splicing factor 45 [Sus scrofa]	sp|Q5R5V3|GPD1L_PONAB	1	0.660154	1.47543	1.31439	1.76021
gi|350593430|ref|XP_003483683.1| PREDICTED: glutathione reductase, mitochondrial isoform 1 [Sus scrofa]	sp|Q9QZA2|PDC6I_RAT	1	0.74279	1.80753	1.61271	1.76045
gi|311259162|ref|XP_003127965.1| PREDICTED: far upstream element-binding protein 1 [Sus scrofa]	sp|Q8HXY2|MCAT_MACFA	1	0.459763	1.41425	1.04947	1.77177
gi|112976|sp|P00503.3|AATC_PIG RecName: Full=Aspartate aminotransferase, cytoplasmic; AltName: Full=Glutamate oxaloacetate transaminase 1; AltName: Full=Transaminase A >gi|47522636|ref|NP_999092.1| aspartate aminotransferase, cytoplasmic [Sus scrofa] >gi|300557343|emb|CBV09643.1|	sp|Q80X90|FLNB_MOUSE	1	1.21201	1.19576	1.32155	1.77527
gi|311252000|ref|XP_003124873.1| PREDICTED: fumarylacetoacetate hydrolase domain-containing protein 2-like isoform 2 [Sus scrofa]	sp|Q9H845|ACAD9_HUMAN	1	0.630137	0.897883	0.851806	1.77584
gi|113205586|ref|NP_001038000.1| 26S proteasome non-ATPase regulatory subunit 4 [Sus scrofa] >gi|55983054|gb|AAV69969.1| proteasome 26S subunit non-ATPase 4 [Sus scrofa]	sp|P53620|COPG1_BOVIN	1	0.823734	1.44899	1.48092	1.78348
gi|1839536|gb|AAB47145.1| dipeptidyl peptidase II, DPP II, dipeptidyl aminopeptidase II {N-terminal} [swine, seminal plasma, Peptide Partial, 41 aa] >gi|1881845|gb|AAB49532.1| dipeptidyl-peptidase II, DPP II {N-terminal} {EC 3.4.14.2} [swine, seminal plasma, Peptide Partial,	sp|P60123|RUVB1_RAT	1	2	1.26214	1.79612	1.78641
gi|350592546|ref|XP_001925361.4| PREDICTED: TP53-regulated inhibitor of apoptosis 1-like, partial [Sus scrofa]	sp|Q9GLC3|AT1B3_RABIT	1	0.607261	1.50935	1.11496	1.78713
gi|178056175|ref|NP_001116558.1| basigin precursor [Sus scrofa] >gi|166244451|gb|ABY86570.1| CD147 [Sus scrofa]	sp|Q3V0K9|PLSI_MOUSE	1	0.869427	1.57643	1.1051	1.78875
gi|194036975|ref|XP_001927782.1| PREDICTED: polyadenylate-binding protein 1 [Sus scrofa]	sp|P07768|SUIS_RABIT	1	0.834279	1.63905	1.48581	1.79909
gi|190360663|ref|NP_001121949.1| FYVE and coiled-coil domain-containing protein 1 [Sus scrofa] >gi|41688293|dbj|BAD08647.1| FYVE and coiled-coil domain containing 1 [Sus scrofa]	sp|O97490|TRFM_RABIT	1	0.914403	1.35309	1.60329	1.79918
gi|335309994|ref|XP_003130977.2| PREDICTED: hypothetical protein LOC100522509, partial [Sus scrofa]	sp|Q14789|GOGB1_HUMAN	1	1.23529	0.951091	1.30998	1.79974
gi|311270662|ref|XP_003132938.1| PREDICTED: phosphatidylethanolamine-binding protein 1-like [Sus scrofa]	sp|Q9NT62|ATG3_HUMAN	1	0.844262	1.45316	1.34895	1.80562
gi|350587371|ref|XP_003482396.1| PREDICTED: cytosol aminopeptidase-like [Sus scrofa]	sp|Q0MQJ2|NDUV3_PANTR	1	0.571651	0.680685	1.27103	1.80685
gi|218664475|ref|NP_001136306.1| remodeling and spacing factor 1 [Sus scrofa] >gi|213688843|gb|ACJ53937.1| remodeling and spacing factor 1 [Sus scrofa]	sp|Q9GKU1|PDLI2_MACFA	1	0.357377	1.51639	1.43934	1.81803
gi|350591965|ref|XP_003132730.3| PREDICTED: autophagy-related 3 isoform 2 [Sus scrofa]	sp|Q5H9U9|DDX6L_HUMAN	1	0.594892	1.20581	1.25939	1.82023
gi|350593970|ref|XP_001925937.3| PREDICTED: 26S proteasome non-ATPase regulatory subunit 1 [Sus scrofa]	sp|Q922J3|CLIP1_MOUSE	1	1.12512	0.8962	1.21872	1.8304
gi|311250341|ref|XP_003124106.1| PREDICTED: transcription initiation factor TFIID subunit 7 [Sus scrofa]	sp|B2RZ78|VPS29_RAT	1	0.729872	1.65237	1.49887	1.83822
gi|343887360|ref|NP_001230581.1| proteasome (prosome, macropain) subunit, alpha type [Sus scrofa]	sp|Q8NHP8|PLBL2_HUMAN	1	0.693322	1.49912	1.46046	1.84359
gi|51512143|gb|AAU05316.1| hepatitis B virus x interacting protein [Sus scrofa]	sp|O43715|TRIA1_HUMAN	1	0.603239	0.767881	0.784076	1.8502
gi|350592272|ref|XP_003483433.1| PREDICTED: LOW QUALITY PROTEIN: PDZ and LIM domain protein 2-like [Sus scrofa]	sp|Q15459|SF3A1_HUMAN	1	1.41611	1.36379	1.35963	1.85216
gi|350582222|ref|XP_003481226.1| PREDICTED: LOW QUALITY PROTEIN: dynactin subunit 1 [Sus scrofa]	sp|B9A064|IGLL5_HUMAN	1	0.762141	1.72646	1.20119	1.85927
gi|47523628|ref|NP_999442.1| aminopeptidase N [Sus scrofa] >gi|1703286|sp|P15145.3|AMPN_PIG RecName: Full=Aminopeptidase N; Short=AP-N; Short=pAPN; AltName: Full=Alanyl aminopeptidase; AltName: Full=Aminopeptidase M; Short=AP-M; AltName: Full=Microsomal aminopeptidase; AltName:	sp|Q60HC3|HNRPF_MACFA	1	3.22403	1.90224	2.64155	1.85947
gi|350587962|ref|XP_003482523.1| PREDICTED: PDZ and LIM domain protein 5 isoform 1 [Sus scrofa]	sp|O94855|SC24D_HUMAN	1	0.697878	1.52559	1.2422	1.86767
gi|335284379|ref|XP_003354588.1| PREDICTED: dCTP pyrophosphatase 1-like [Sus scrofa]	sp|Q9JHE3|ASAH2_MOUSE	1	0.377788	1.10774	1.33175	1.87138
gi|350581286|ref|XP_003124146.3| PREDICTED: hypothetical protein LOC100516425 [Sus scrofa]	sp|Q5E9E1|PDLI1_BOVIN	1	0.637217	1.37327	1.35616	1.87521
gi|2833353|sp|Q29058.1|LEG4_PIG RecName: Full=Galectin-4; Short=Gal-4; AltName: Full=L-36 lactose-binding protein; Short=L36LBP; AltName: Full=Lactose-binding lectin 4 >gi|47522788|ref|NP_999146.1| galectin-4 [Sus scrofa] >gi|623346|emb|CAA55884.1| L-36 lactose binding protein [Su	sp|P25113|PGAM1_RAT	1	0.989891	1.514	1.47823	1.88258
gi|311246780|ref|XP_003122339.1| PREDICTED: haloacid dehalogenase-like hydrolase domain-containing protein 2-like [Sus scrofa]	sp|Q5RA22|5NTC_PONAB	1	1.04242	1.25993	1.4648	1.8926
gi|335309568|ref|XP_003130716.2| PREDICTED: ubiquitin-associated protein 2-like, partial [Sus scrofa]	sp|Q1JPJ2|XPP1_BOVIN	1	1.54702	1.45389	1.66456	1.89964
gi|350582036|ref|XP_003481179.1| PREDICTED: U5 small nuclear ribonucleoprotein 200 kDa helicase [Sus scrofa]	sp|Q8C9S4|CJ118_MOUSE	1	1.16202	1.19861	1.12369	1.90592
gi|194044822|ref|XP_001927404.1| PREDICTED: peroxiredoxin-4 [Sus scrofa]	sp|P09849|LPH_RABIT	1	0.632081	1.26034	1.43412	1.90643
gi|350579447|ref|XP_003480607.1| PREDICTED: protein NipSnap homolog 3A [Sus scrofa]	sp|P47791|GSHR_MOUSE	1	0.809524	1.3013	1.4303	1.91082
gi|350589456|ref|XP_003357762.2| PREDICTED: ubiquilin-1 [Sus scrofa]	sp|Q6PIF6|MYO7B_HUMAN	1	1.28249	1.00862	1.59682	1.91247
gi|255683394|ref|NP_001157474.1| ornithine carbamoyltransferase, mitochondrial [Sus scrofa]	sp|P28676|GRAN_HUMAN	1	1.03456	1.32488	1.82258	1.91359
gi|47523692|ref|NP_999478.1| thioredoxin [Sus scrofa] >gi|20141821|sp|P82460.3|THIO_PIG RecName: Full=Thioredoxin; Short=Trx >gi|332368598|gb|AEE61373.1| thioredoxin [Sus scrofa] >gi|14326453|gb|AAK60272.1|AF382821_1 thioredoxin [Sus scrofa]	-	1	0.828262	1.44354	1.48005	1.92563
gi|164414678|emb|CAO81735.1| Alternative Pig Liver Esterase [Sus scrofa]	sp|P41562|IDHC_RAT	1	0.769895	1.17737	1.73634	1.92809
gi|347543777|ref|NP_001231552.1| protein LYRIC [Sus scrofa]	sp|P31327|CPSM_HUMAN	1	0.616065	1.84819	1.35962	1.94473
gi|346644699|ref|NP_001231019.1| protein SET [Sus scrofa]	sp|P52594|AGFG1_HUMAN	1	0.817008	1.62863	1.67384	1.94618
gi|350587882|ref|XP_003129304.3| PREDICTED: caspase-6-like [Sus scrofa]	sp|Q99460|PSMD1_HUMAN	1	0.731318	1.70337	1.76954	1.95094
gi|311259466|ref|XP_003128111.1| PREDICTED: putative hydroxypyruvate isomerase-like isoform 1 [Sus scrofa]	sp|Q64550|UD11_RAT	1	1.00163	1.15366	1.22033	1.9561
gi|350585079|ref|XP_003127070.3| PREDICTED: xaa-Pro dipeptidase [Sus scrofa]	sp|Q9HAW9|UD18_HUMAN	1	1.26762	1.04268	1.35095	1.979
gi|47523822|ref|NP_999549.1| glutamate carboxypeptidase 2 [Sus scrofa] >gi|20138100|sp|O77564.1|FOLH1_PIG RecName: Full=Glutamate carboxypeptidase 2; AltName: Full=Folate hydrolase 1; AltName: Full=Folylpoly-gamma-glutamate carboxypeptidase; Short=FGCP; AltName: Full=Glutamate	sp|Q9D0R2|SYTC_MOUSE	1	0.860786	2.53773	2.99362	1.98937
gi|335296241|ref|XP_003357722.1| PREDICTED: ladinin-1-like [Sus scrofa]	sp|Q14677|EPN4_HUMAN	1	0.511088	1.46777	0.995358	1.98969
gi|350589336|ref|XP_003130615.3| PREDICTED: heterogeneous nuclear ribonucleoprotein U [Sus scrofa]	sp|Q60HH4|ASAH1_MACFA	1	1.68732	1.10798	1.64883	1.99437
gi|298104082|ref|NP_001177109.1| dynein light chain roadblock-type 1 [Sus scrofa]	sp|Q99PL5|RRBP1_MOUSE	1	0.833333	0.897363	1.39925	2.00282
gi|61214649|sp|Q767K9.1|PP1RA_PIG RecName: Full=Serine/threonine-protein phosphatase 1 regulatory subunit 10; AltName: Full=MHC class I region proline-rich protein CAT53; AltName: Full=Protein FB19 >gi|178056844|ref|NP_001116637.1| serine/threonine-protein phosphatase 1 regulatory s	sp|Q9BY32|ITPA_HUMAN	1	0.691418	1.20636	1.21986	2.02604
gi|311248177|ref|XP_003123013.1| PREDICTED: proteasome subunit alpha type-1-like [Sus scrofa]	sp|P56658|ADA_BOVIN	1	0.617211	1.45772	1.34644	2.03561
gi|311252444|ref|XP_003125100.1| PREDICTED: small nuclear ribonucleoprotein G-like [Sus scrofa]	sp|D2GVP7|STAU1_AILME	1	1.65464	1.79891	2.59891	2.05246
gi|350579445|ref|XP_003480606.1| PREDICTED: protein NipSnap homolog 3A-like [Sus scrofa]	sp|A0FGR8|ESYT2_HUMAN	1	0.864917	1.11467	1.65209	2.05345
gi|335304027|ref|XP_003134070.2| PREDICTED: 28S ribosomal protein S36, mitochondrial-like [Sus scrofa]	sp|Q6ZWM4|NAA38_MOUSE	1	0.926074	0.855014	0.971347	2.05501
gi|350529356|ref|NP_001231917.1| NADH dehydrogenase (ubiquinone) Fe-S protein 5, 15kDa (NADH-coenzyme Q reductase) [Sus scrofa]	sp|Q13185|CBX3_HUMAN	1	0.945588	1.36029	1.47059	2.05735
gi|311258794|ref|XP_003127785.1| PREDICTED: sphingomyelin phosphodiesterase, acid-like 3B [Sus scrofa]	sp|Q02218|ODO1_HUMAN	1	1.66637	1.35342	1.22122	2.06115
gi|148235064|ref|NP_001090909.1| myc box-dependent-interacting protein 1 [Sus scrofa] >gi|119352621|gb|ABL63907.1| bridging integrator 1 [Sus scrofa]	sp|Q3T0Y5|PSA2_BOVIN	1	0.836785	1.02486	1.69925	2.06877
gi|350588522|ref|XP_003482670.1| PREDICTED: ubiquitin carboxyl-terminal hydrolase 28-like [Sus scrofa]	sp|P52788|SPSY_HUMAN	1	0.684717	1.2503	1.77858	2.071
gi|298160941|ref|NP_001177148.1| pterin-4 alpha-carbinolamine dehydratase/dimerization cofactor of hepatocyte nuclear factor 1 alpha [Sus scrofa]	sp|P70501|RBM10_RAT	1	1.28997	1.69512	1.51762	2.07453
gi|335310428|ref|XP_003362028.1| PREDICTED: surfeit locus protein 4-like, partial [Sus scrofa]	sp|Q9JHZ4|GRAP1_RAT	1	1.71166	0.502045	0.710634	2.07566
gi|350595655|ref|XP_003135120.3| PREDICTED: RNA-binding protein 10-like [Sus scrofa]	sp|P05370|G6PD_RAT	1	0.741437	1.90685	1.61863	2.08438
gi|342187294|ref|NP_001230119.1| syndecan-1 precursor [Sus scrofa]	sp|Q9TT13|VDAC3_RABIT	1	1.20143	4.45429	2.53857	2.11714
gi|167908791|ref|NP_001108148.1| EPLIN-b [Sus scrofa] >gi|86450155|gb|ABC96266.1| EPLIN-b [Sus scrofa]	sp|Q9JLQ0|CD2AP_MOUSE	1	0.691776	1.43884	1.05805	2.1237
gi|335299026|ref|XP_003132223.2| PREDICTED: microtubule-associated protein 4-like [Sus scrofa]	sp|Q9JHW9|AL1A3_MOUSE	1	0.820283	1.80686	1.57793	2.12528
gi|350579947|ref|XP_003122565.3| PREDICTED: U4/U6.U5 tri-snRNP-associated protein 1 [Sus scrofa]	sp|P30084|ECHM_HUMAN	1	0.73185	2.09368	1.77049	2.13466
gi|350580865|ref|XP_003123779.3| PREDICTED: tubulin-specific chaperone A-like [Sus scrofa]	sp|Q7TMA5|APOB_RAT	1	1.64392	1.25804	2.33098	2.14118
gi|311247522|ref|XP_003122684.1| PREDICTED: succinate dehydrogenase assembly factor 2, mitochondrial-like [Sus scrofa]	sp|P17050|NAGAB_HUMAN	1	0.701023	0.86074	1.37687	2.15342
gi|253577|gb|AAB22893.1| myosin light chain isoform LC17a [swine, aorta smooth muscle, Peptide, 150 aa]	sp|P23284|PPIB_HUMAN	1	0.577381	1.07275	0.974206	2.16468
gi|148225750|ref|NP_001090973.1| heat shock protein 105 kDa [Sus scrofa] >gi|141521428|gb|ABO88027.1| heat shock 105kDa/110kDa protein 1 [Sus scrofa]	sp|Q8R1Q9|RBSK_MOUSE	1	1.04953	1.51138	1.96921	2.16734
gi|297747302|ref|NP_001172115.1| aspartyl aminopeptidase [Sus scrofa]	sp|Q8HXY0|ETFA_MACFA	1	0.841856	1.22984	1.44333	2.16974
gi|194039474|ref|XP_001924848.1| PREDICTED: DNA replication licensing factor MCM3 [Sus scrofa]	sp|O97492|CATA_CANFA	1	0.938511	1.12362	1.40453	2.18252
gi|343790970|ref|NP_001230536.1| translin-associated protein X [Sus scrofa]	sp|Q61545|EWS_MOUSE	1	1.35033	1.16078	1.49542	2.19346
gi|194035837|ref|XP_001928904.1| PREDICTED: peroxisomal biogenesis factor 19 isoform 1 [Sus scrofa]	sp|O43143|DHX15_HUMAN	1	0.822538	1.60248	1.30346	2.20142
gi|194018702|ref|NP_001123419.1| tropomyosin beta chain [Sus scrofa] >gi|83778524|gb|ABC47143.1| beta-tropomyosin [Sus scrofa]	sp|P0CB96|NDUS4_PONPY	1	0.628834	1.45092	1.62117	2.21626
gi|350596362|ref|XP_003361090.2| PREDICTED: CD2-associated protein-like [Sus scrofa]	sp|P07237|PDIA1_HUMAN	1	0.9712	2.0032	2.044	2.2216
gi|5915886|sp|O46427.1|CATH_PIG RecName: Full=Pro-cathepsin H; Contains: RecName: Full=Cathepsin H mini chain; Contains: RecName: Full=Cathepsin H; Contains: RecName: Full=Cathepsin H heavy chain; Contains: RecName: Full=Cathepsin H light chain; Flags: Precursor >gi|47522632|ref|N	sp|P34949|MPI_HUMAN	1	0.758621	2.6092	2.05747	2.23563
gi|47115532|sp|Q9XT00.2|DHB8_PIG RecName: Full=Estradiol 17-beta-dehydrogenase 8; AltName: Full=17-beta-hydroxysteroid dehydrogenase 8; Short=17-beta-HSD 8; AltName: Full=3-oxoacyl-[acyl-carrier-protein] reductase; AltName: Full=Protein Ke6; Short=Ke-6; AltName: Full=Testosterone 1	sp|A2RUW1|TOLIP_RAT	1	2.12667	1.51917	2.07	2.23667
gi|346986418|ref|NP_001231359.1| DnaJ (Hsp40) homolog, subfamily B, member 1 [Sus scrofa]	sp|Q9D0F9|PGM1_MOUSE	1	0.791349	0.636766	1.00369	2.2406
gi|311263676|ref|XP_003129789.1| PREDICTED: dipeptidyl peptidase 1-like [Sus scrofa]	sp|Q6XQN6|PNCB_HUMAN	1	0.97931	2.04138	2.17931	2.24828
gi|347446687|ref|NP_001231527.1| glucosidase 2 subunit beta precursor [Sus scrofa]	sp|O97961|KTN1_VULVU	1	0.702069	1.58069	1.30276	2.26207
gi|350594954|ref|XP_003360054.2| PREDICTED: adenosine deaminase [Sus scrofa]	sp|Q5M868|GBA2_RAT	1	0.601831	0.955759	1.02441	2.27079
gi|311251345|ref|XP_003124567.1| PREDICTED: rab GTPase-binding effector protein 2-like [Sus scrofa]	sp|Q4R4W5|IDI1_MACFA	1	1.01782	1.53752	1.69325	2.28799
gi|297307133|ref|NP_001171997.1| protein canopy homolog 2 precursor [Sus scrofa]	sp|O08808|DIAP1_MOUSE	1	1.21037	1.78098	1.39481	2.29107
gi|148234672|ref|NP_001090881.1| porphobilinogen deaminase [Sus scrofa] >gi|112980813|gb|ABI29188.1| hydroxymethylbilane synthase [Sus scrofa]	sp|P52193|CALR_BOVIN	1	0.974494	1.48901	1.42832	2.29376
gi|2500586|sp|Q29099.1|PTBP1_PIG RecName: Full=Polypyrimidine tract-binding protein 1; Short=PTB; AltName: Full=Heterogeneous nuclear ribonucleoprotein I; Short=hnRNP I >gi|47523538|ref|NP_999396.1| polypyrimidine tract-binding protein 1 [Sus scrofa] >gi|1122433|emb|CAA63597.1| pol	sp|P26368|U2AF2_HUMAN	1	0.573129	2.93282	1.44643	2.30782
gi|350536531|ref|NP_001233199.1| phosphatidylinositol-binding clathrin assembly protein [Sus scrofa] >gi|338784421|gb|AEI98873.1| phosphatidylinositol-binding clathrin assembly protein [Sus scrofa]	sp|P06727|APOA4_HUMAN	1	1.10579	1.30193	1.48031	2.31197
gi|343962595|ref|NP_001230634.1| thioredoxin, mitochondrial [Sus scrofa]	sp|Q01361|CP2DE_BOVIN	1	1.5872	2.3376	2.0896	2.312
gi|6094365|sp|O02799.1|STAT2_PIG RecName: Full=Signal transducer and activator of transcription 2 >gi|47522708|ref|NP_999054.1| signal transducer and activator of transcription 2 [Sus scrofa] >gi|315273316|gb|ADU03225.1| signal transducer and activator of transcription 2 [Sus scrof	sp|P13667|PDIA4_HUMAN	1	0.972071	1.68115	1.52056	2.31808
gi|349732213|ref|NP_001231857.1| LSM3 homolog, U6 small nuclear RNA associated [Sus scrofa]	sp|P13214|ANXA4_BOVIN	1	1.02679	1.46738	1.45707	2.3204
gi|350595475|ref|XP_003360255.2| PREDICTED: proteasome subunit alpha type-2-like [Sus scrofa]	sp|Q3SZB4|ACADM_BOVIN	1	1.02428	1.47528	1.66002	2.32871
gi|350592730|ref|XP_003483523.1| PREDICTED: heterogeneous nuclear ribonucleoprotein F [Sus scrofa] >gi|335301642|ref|XP_003359253.1| PREDICTED: heterogeneous nuclear ribonucleoprotein F [Sus scrofa] >gi|194042674|ref|XP_001929089.1| PREDICTED: heterogeneous nuclear ribonucleoprotei	sp|Q9TQX6|ACBP_CANFA	1	1.21593	2.29979	1.42977	2.33543
gi|311259825|ref|XP_001924399.2| PREDICTED: leucine-rich repeat-containing protein 16A [Sus scrofa]	sp|Q1JPB0|ILEU_BOVIN	1	0.686782	1.34483	0.993678	2.34943
gi|350593039|ref|XP_001929313.3| PREDICTED: cytosolic purine 5~-nucleotidase isoform 1 [Sus scrofa]	sp|Q5RE79|ODPB_PONAB	1	1.6559	1.13808	1.61693	2.34967
gi|47522844|ref|NP_999174.1| complement C3 precursor [Sus scrofa] >gi|11869931|gb|AAG40565.1|AF154933_1 complement component C3 [Sus scrofa] >gi|27801787|emb|CAD38823.2| complement C3 precursor [Sus scrofa]	sp|P62914|RL11_RAT	1	1.35629	2.4649	2.33775	2.37616
gi|311248892|ref|XP_003123362.1| PREDICTED: lysosomal alpha-mannosidase-like isoform 1 [Sus scrofa]	sp|E2RR58|RL12_CANFA	1	1.81452	1.18952	1.875	2.37903
gi|38569721|gb|AAR24381.1| isopentyl-diphosphate delta isomerase [Sus scrofa]	sp|P10575|GLRX1_BOVIN	1	0.803007	1.69155	1.50804	2.40176
gi|194033860|ref|XP_001927901.1| PREDICTED: UV excision repair protein RAD23 homolog B [Sus scrofa]	sp|P61247|RS3A_HUMAN	1	0.868098	1.49693	2.17076	2.409
gi|329663948|ref|NP_001192334.1| ras GTPase-activating protein-binding protein 1 [Sus scrofa]	sp|P43274|H14_MOUSE	1	0.923657	1.62488	1.68332	2.40999
gi|121118|sp|P20305.1|GELS_PIG RecName: Full=Gelsolin; AltName: Full=Actin-depolymerizing factor; Short=ADF; AltName: Full=Brevin; Flags: Precursor >gi|164472|gb|AAA31042.1| plasma gelsolin precursor, partial [Sus scrofa] >gi|758306|emb|CAA32077.1| gelsolin [Sus scrofa]	sp|Q04467|IDHP_BOVIN	1	0.948502	1.52622	1.45131	2.41667
gi|347300360|ref|NP_001231474.1| serine/arginine repetitive matrix protein 2 [Sus scrofa]	sp|P55156|MTP_BOVIN	1	0.679333	1.41798	0.954588	2.42076
gi|148222268|ref|NP_001090952.1| tropomyosin alpha-1 chain [Sus scrofa] >gi|158931149|sp|P42639.2|TPM1_PIG RecName: Full=Tropomyosin alpha-1 chain; AltName: Full=Alpha-tropomyosin; AltName: Full=Tropomyosin-1 >gi|117661180|gb|ABK55659.1| TPM1 [Sus scrofa]	sp|Q5TJF5|DHB8_CANFA	1	0.58359	1.63282	1.62359	2.42564
gi|178056464|ref|NP_001116693.1| beta-hexosaminidase subunit alpha precursor [Sus scrofa] >gi|169117926|gb|ACA43012.1| hexosaminidase A alpha polypeptide [Sus scrofa]	sp|A5A6K2|TCTP_PANTR	1	1.79114	1.32911	1.53165	2.43671
gi|335292272|ref|XP_003356696.1| PREDICTED: fumarylacetoacetase-like [Sus scrofa]	sp|Q3SZI6|RPN2_BOVIN	1	1.00492	1.51046	1.38991	2.43788
gi|335281552|ref|XP_003122601.2| PREDICTED: EH domain-containing protein 1 [Sus scrofa]	sp|P85972|VINC_RAT	1	1.37324	1.51937	1.49296	2.44366
gi|335290571|ref|XP_003356212.1| PREDICTED: UPF0485 protein C1orf144 homolog isoform 2 [Sus scrofa]	sp|O55022|PGRC1_MOUSE	1	0.308989	1.83474	2.02715	2.46536
gi|335310367|ref|XP_003361999.1| PREDICTED: heterogeneous nuclear ribonucleoprotein H2-like [Sus scrofa]	sp|P51174|ACADL_MOUSE	1	1.24481	2.34647	1.42739	2.4751
gi|122064241|sp|Q06AT0.3|HPCL1_PIG RecName: Full=Hippocalcin-like protein 1 >gi|178056468|ref|NP_001116598.1| hippocalcin-like protein 1 [Sus scrofa] >gi|115394792|gb|ABI97190.1| HPCL1 [Sus scrofa]	sp|P33908|MA1A1_HUMAN	1	1.15449	1.79019	1.75783	2.48017
gi|350580243|ref|XP_003123005.3| PREDICTED: harmonin-like [Sus scrofa]	sp|Q9TT15|VDAC1_RABIT	1	1.11001	1.78739	1.35723	2.49444
gi|237681312|ref|NP_001153744.1| protein S100-A12 [Sus scrofa] >gi|126302600|sp|P80310.2|S10AC_PIG RecName: Full=Protein S100-A12; AltName: Full=Calgranulin-C; Short=CAGC; AltName: Full=Extracellular newly identified RAGE-binding protein; Short=EN-RAGE; AltName: Full=S100 calcium-b	sp|Q8HXX4|ECHB_MACFA	1	1.09766	2.01758	1.01367	2.51562
gi|311273235|ref|XP_003133777.1| PREDICTED: intestinal-type alkaline phosphatase-like isoform 2 [Sus scrofa]	sp|Q76LV2|HS90A_BOVIN	1	0.812803	1.27352	1.79922	2.5451
gi|335307509|ref|XP_003360867.1| PREDICTED: lipoma-preferred partner-like, partial [Sus scrofa]	sp|Q07130|UGPA_BOVIN	1	0.811739	1.77309	1.44166	2.54903
gi|118403904|ref|NP_001072131.1| protein DJ-1 [Sus scrofa] >gi|67038668|gb|AAY63803.1| DJ-1 protein [Sus scrofa]	sp|P67984|RL22_MOUSE	1	0.975469	1.78066	1.4329	2.5671
gi|116551|sp|P04404.2|CMGA_PIG RecName: Full=Chromogranin-A; Short=CgA; Contains: RecName: Full=Pancreastatin; Contains: RecName: Full=Parastatin; Contains: RecName: Full=WE-14; Flags: Precursor >gi|164417|gb|AAA31016.1| chromogranin A precursor, partial [Sus scrofa]	sp|Q8BMF4|ODP2_MOUSE	1	0.809701	2.25653	1.73974	2.56903
gi|343780936|ref|NP_001230484.1| heterogeneous nuclear ribonucleoprotein H3 [Sus scrofa]	sp|P12387|CO3_CAVPO	1	1.29087	2.47983	1.46497	2.58174
gi|350594565|ref|XP_003134235.3| PREDICTED: acid ceramidase-like [Sus scrofa]	sp|Q9UM54|MYO6_HUMAN	1	1.26512	1.53915	1.70463	2.59253
gi|305855176|ref|NP_001182260.1| cleavage and polyadenylation specificity factor subunit 6 [Sus scrofa] >gi|285818464|gb|ADC38905.1| cleavage and polyadenylation specific factor 6 [Sus scrofa]	sp|P78417|GSTO1_HUMAN	1	1.71875	1.39516	1.72782	2.61391
gi|194036296|ref|XP_001926524.1| PREDICTED: splicing factor 3B subunit 4 [Sus scrofa]	sp|P14920|OXDA_HUMAN	1	1.00209	1.45303	1.10438	2.61587
gi|350580651|ref|XP_003480867.1| PREDICTED: scaffold attachment factor B1-like isoform 2 [Sus scrofa]	sp|Q29RY9|NPL_BOVIN	1	0.744409	2.55335	2.43706	2.61725
gi|350582315|ref|XP_003481243.1| PREDICTED: NFU1 iron-sulfur cluster scaffold homolog, mitochondrial-like [Sus scrofa]	sp|Q2PFV2|CASP3_MACFA	1	0.758599	1.18089	1.36561	2.61783
gi|194036227|ref|XP_001929678.1| PREDICTED: selenium-binding protein 1 [Sus scrofa]	sp|Q9GLW7|PRDX5_CHLAE	1	0.943907	1.94487	2.03191	2.62669
gi|350594464|ref|XP_003483904.1| PREDICTED: LOW QUALITY PROTEIN: clathrin interactor 1 [Sus scrofa]	sp|Q28035|GSTA1_BOVIN	1	1.46768	1.15759	1.39942	2.63834
gi|311253255|ref|XP_003125488.1| PREDICTED: alanine aminotransferase 1-like [Sus scrofa]	sp|P01859|IGHG2_HUMAN	1	1.24041	0.789446	2.23827	2.64499
gi|335309827|ref|XP_003361787.1| PREDICTED: nuclear autoantigenic sperm protein, partial [Sus scrofa]	sp|P01833|PIGR_HUMAN	1	0.880576	2.18489	2.10144	2.6554
gi|350589440|ref|XP_003130687.3| PREDICTED: Golgi membrane protein 1-like [Sus scrofa]	sp|Q148L6|DHDH_BOVIN	1	0.540785	1.46425	1.77442	2.66667
gi|350590315|ref|XP_003483030.1| PREDICTED: eukaryotic translation initiation factor 1-like [Sus scrofa]	sp|P62143|PP1B_RABIT	1	1.16392	1.60219	1.47599	2.68656
gi|350581244|ref|XP_003354387.2| PREDICTED: transcription elongation regulator 1-like [Sus scrofa]	sp|P20456|IMPA1_BOVIN	1	0.865069	1.30013	1.47793	2.68726
gi|350592457|ref|XP_001929016.4| PREDICTED: CAP-Gly domain-containing linker protein 1 [Sus scrofa]	sp|Q29RK1|CISY_BOVIN	1	1.23297	1.53644	1.95818	2.71207
gi|346986249|ref|NP_001231282.1| proteasome subunit beta type-1 [Sus scrofa]	sp|P79098|AMPN_BOVIN	1	1.33042	1.50787	1.9729	2.7229
gi|311259005|ref|XP_003127890.1| PREDICTED: myosin regulatory light chain 12B isoform 2 [Sus scrofa] >gi|311259003|ref|XP_003127889.1| PREDICTED: myosin regulatory light chain 12B isoform 1 [Sus scrofa]	sp|Q9JHJ0|TMOD3_MOUSE	1	0.717698	0.927253	1.19001	2.73507
gi|350586921|ref|XP_003482304.1| PREDICTED: LOW QUALITY PROTEIN: apoptotic chromatin condensation inducer in the nucleus-like [Sus scrofa]	sp|P51660|DHB4_MOUSE	1	1.0465	1.69024	1.94303	2.74001
gi|350588987|ref|XP_003130351.3| PREDICTED: protein PRRC2C [Sus scrofa]	sp|P00973|OAS1_HUMAN	1	0.716535	2.62402	2.13484	2.75
gi|350584145|ref|XP_001929467.3| PREDICTED: nascent polypeptide-associated complex subunit alpha isoform 1 [Sus scrofa]	sp|O97680|THIO_BOVIN	1	0.698524	2.4603	1.52565	2.75545
gi|335310692|ref|XP_003362151.1| PREDICTED: protein LZIC-like [Sus scrofa]	sp|P13135|CPNS1_BOVIN	1	1.10328	1.77662	1.84788	2.77262
gi|113205878|ref|NP_001038072.1| delta(3,5)-Delta(2,4)-dienoyl-CoA isomerase, mitochondrial [Sus scrofa] >gi|90024980|gb|AAZ82038.2| peroxisomal enoyl coenzyme A hydratase 1 [Sus scrofa]	sp|P67936|TPM4_HUMAN	1	0.575939	2.97611	2.15614	2.8029
gi|297747368|ref|NP_001172101.1| ubiquinol-cytochrome c reductase binding protein [Sus scrofa]	sp|P11498|PYC_HUMAN	1	0.489624	1.21649	1.69714	2.84072
gi|62529273|gb|AAX84942.1| type III calpastatin [Sus scrofa]	sp|P20020|AT2B1_HUMAN	1	1.15301	1.70318	1.66221	2.84532
gi|335287361|ref|XP_001928581.3| PREDICTED: formin binding protein 1-like [Sus scrofa]	sp|P07099|HYEP_HUMAN	1	0.806622	1.73589	1.75847	2.85929
gi|261490800|ref|NP_001159781.1| survival of motor neuron-related-splicing factor 30 [Sus scrofa] >gi|190333253|gb|ACE73645.1| survival motor neuron domain-containing protein 1 [Sus scrofa] >gi|190576653|gb|ACE73646.1| survival motor neuron domain-containing protein 1 [Sus scrofa]	sp|P25398|RS12_HUMAN	1	0.688013	2.34483	1.73892	2.86289
gi|113205682|ref|NP_001038022.1| protein S100-A6 [Sus scrofa] >gi|97190495|sp|Q2EN75.1|S10A6_PIG RecName: Full=Protein S100-A6; AltName: Full=Calcyclin; AltName: Full=S100 calcium-binding protein A6 >gi|87047648|gb|ABD18457.1| S100 calcium-binding protein A6 [Sus scrofa]	sp|P67776|PP2AA_PIG	1	0.99634	1.24886	1.13724	2.86459
gi|350583407|ref|XP_003481511.1| PREDICTED: cathepsin S [Sus scrofa]	sp|P35222|CTNB1_HUMAN	1	0.761832	1.97405	2.42748	2.87786
gi|311247993|ref|XP_003122918.1| PREDICTED: probable methylthioribulose-1-phosphate dehydratase-like [Sus scrofa]	sp|P68003|VDAC2_RABIT	1	0.992331	2.02531	2.04985	2.91181
gi|57528035|ref|NP_001009582.1| stathmin [Sus scrofa] >gi|75043336|sp|Q6DUB7.3|STMN1_PIG RecName: Full=Stathmin >gi|49615355|gb|AAT66936.1| stathmin-1 [Sus scrofa]	sp|Q04609|FOLH1_HUMAN	1	0.880729	1.52233	1.80905	2.95887
gi|346421423|ref|NP_001231086.1| peptidyl-prolyl cis-trans isomerase FKBP3 [Sus scrofa]	sp|O77834|PRDX6_BOVIN	1	1.75421	2.00843	2.14185	2.95927
gi|312062797|ref|NP_001185848.1| proactivator polypeptide precursor [Sus scrofa] >gi|310789269|gb|ADP24688.1| prosaposin variant 2 [Sus scrofa]	sp|P12236|ADT3_HUMAN	1	0.978648	1.69395	1.88968	2.96085
gi|335287837|ref|XP_001926233.3| PREDICTED: prefoldin subunit 5-like isoform 1 [Sus scrofa]	sp|Q3T0L5|EPCAM_BOVIN	1	0.857143	1.87212	1.92627	2.9735
gi|350586216|ref|XP_003128039.3| PREDICTED: thioredoxin domain-containing protein 12-like [Sus scrofa]	sp|Q9TVD0|CASB_CAMDR	1	0.80038	1.70913	1.83935	2.97433
gi|114689|sp|P13618.1|ATP5J_PIG RecName: Full=ATP synthase-coupling factor 6, mitochondrial; Short=ATPase subunit F6	sp|P27605|HPRT_RAT	1	1.35552	1.662	1.63222	2.98424
gi|346644844|ref|NP_001231177.1| phosphotriesterase-related protein [Sus scrofa]	sp|Q6QAT0|RL32_PIG	1	0.671913	1.09746	2.1138	2.98608
gi|155369760|ref|NP_001094498.1| peroxisomal acyl-coenzyme A oxidase 1 [Sus scrofa] >gi|112292673|gb|ABI14815.1| palmitoyl acyl-CoA oxidase 1 [Sus scrofa]	sp|Q5NU32|AOFA_HORSE	1	1.19235	1.86908	2.2719	3.01611
gi|162952052|ref|NP_001106151.1| transketolase [Sus scrofa] >gi|159502444|gb|ABW97521.1| transketolase [Sus scrofa]	sp|P50397|GDIB_BOVIN	1	1.37257	1.62743	1.76335	3.0267
gi|194044484|ref|XP_001929185.1| PREDICTED: eukaryotic translation initiation factor 2 subunit 2 [Sus scrofa]	sp|P19035|APOC3_BOVIN	1	1.04993	3.0719	2.31425	3.03595
gi|311248940|ref|XP_003123387.1| PREDICTED: growth arrest and DNA damage-inducible proteins-interacting protein 1-like [Sus scrofa]	sp|Q9Z1N5|DX39B_MOUSE	1	1.09209	2.31655	2.43309	3.10504
gi|194034889|ref|XP_001929437.1| PREDICTED: zinc finger FYVE domain-containing protein 19 [Sus scrofa]	sp|P62799|H4_XENLA	1	0.947826	1.99233	2.06189	3.10844
gi|335289428|ref|XP_003127055.2| PREDICTED: hypothetical protein LOC100523791 [Sus scrofa]	sp|P62831|RL23_PIG	1	1.45385	2.56813	2.41099	3.13846
gi|335307979|ref|XP_003361054.1| PREDICTED: abhydrolase domain-containing protein 10, mitochondrial-like [Sus scrofa]	sp|Q08426|ECHP_HUMAN	1	1.57532	2.73027	2.31707	3.13917
gi|346986241|ref|NP_001231394.1| neurocalcin delta [Sus scrofa] >gi|346986243|ref|NP_001231395.1| neurocalcin delta [Sus scrofa]	sp|O43504|HBXIP_HUMAN	1	1.49194	1.82559	2.39431	3.1564
gi|13399613|pdb|1HM6|A Chain A, X-Ray Structure Of Full-Length Annexin 1 >gi|28948618|pdb|1MCX|A Chain A, Structure Of Full-Length Annexin A1 In The Presence Of Calcium >gi|13399614|pdb|1HM6|B Chain B, X-Ray Structure Of Full-Length Annexin 1	sp|Q32LQ0|AMPE_BOVIN	1	0.643275	1.04386	0.932749	3.16667
gi|335296459|ref|XP_003130769.2| PREDICTED: vimentin-like [Sus scrofa]	sp|Q5E9B7|CLIC1_BOVIN	1	0.665738	1.53482	1.58496	3.1727
gi|298104078|ref|NP_001177106.1| bcl-2-associated transcription factor 1 [Sus scrofa]	sp|P81425|DPP4_BOVIN	1	1.13184	1.24194	2.0021	3.20266
gi|343488538|ref|NP_001230424.1| cytoplasmic dynein 1 intermediate chain 2 [Sus scrofa]	sp|Q6TEQ7|ANXA2_CANFA	1	1.40074	1.59557	1.38319	3.22345
gi|89197|pir||S06905 ferritin heavy chain 2 - pig (fragment)	sp|P63276|RS17_MOUSE	1	1.13889	2.63644	4.2933	3.25654
gi|346644799|ref|NP_001231157.1| thymopoietin [Sus scrofa]	sp|P19016|HBB_HIPAM	1	0.61674	3.14023	2.45595	3.29809
gi|350578316|ref|XP_003121377.3| PREDICTED: absent in melanoma 1 protein [Sus scrofa]	sp|Q9UL46|PSME2_HUMAN	1	0.737379	1.30189	1.72565	3.3075
gi|2494384|sp|Q29550.1|EST1_PIG RecName: Full=Liver carboxylesterase; AltName: Full=Proline-beta-naphthylamidase; AltName: Full=Retinyl ester hydrolase; Short=REH; Flags: Precursor >gi|363817363|emb|CCF23015.1| unnamed protein product [Sus scrofa] >gi|1931|emb|CAA44929.1| carboxyl	sp|P00428|COX5B_BOVIN	1	1.24759	1.43657	3.2126	3.36045
gi|343887438|ref|NP_001230620.1| plasma glutamate carboxypeptidase precursor [Sus scrofa]	sp|Q4R7H5|EF1G_MACFA	1	1.59586	3.86654	3.57331	3.37406
gi|350583346|ref|XP_003125776.3| PREDICTED: ubiquitin associated protein 2-like isoform 3 [Sus scrofa]	sp|Q6PI79|H33_XENLA	1	1.00594	1.98886	2.14116	3.46731
gi|311263942|ref|XP_003129926.1| PREDICTED: oligoribonuclease, mitochondrial-like [Sus scrofa]	sp|P07339|CATD_HUMAN	1	1.41395	1.93023	2.11008	3.50078
gi|311276184|ref|XP_003135086.1| PREDICTED: FUN14 domain-containing protein 1-like [Sus scrofa]	sp|Q3T0T7|SAR1B_BOVIN	1	1.16428	1.4751	1.8237	3.51402
gi|311258366|ref|XP_003127578.1| PREDICTED: espin [Sus scrofa]	sp|Q7YQC6|HSP71_CANFA	1	1.94157	1.64127	1.41642	3.51701
gi|350580953|ref|XP_003354274.2| PREDICTED: 60S acidic ribosomal protein P1-like [Sus scrofa]	sp|Q4R712|STMN1_MACFA	1	0.881653	1.00689	1.65373	3.55479
gi|350580184|ref|XP_003353965.2| PREDICTED: reticulocalbin-1-like isoform 2 [Sus scrofa]	sp|P11279|LAMP1_HUMAN	1	0.929763	1.96049	2.82441	3.56102
gi|311277231|ref|XP_003135559.1| PREDICTED: trimethyllysine dioxygenase, mitochondrial-like [Sus scrofa]	sp|Q3MHL4|SAHH_BOVIN	1	1.22234	2.83868	3.20165	3.57911
gi|350592964|ref|XP_003483582.1| PREDICTED: PDZ and LIM domain protein 1 [Sus scrofa]	sp|Q3T0I2|CATH_BOVIN	1	1.34091	2.06818	2.21165	3.61506
gi|171948776|gb|ACB59245.1| cathepsin B [Sus scrofa]	sp|Q29201|RS16_PIG	1	5.35	6.85	4.4	3.65
gi|350595285|ref|XP_003484077.1| PREDICTED: N-alpha-acetyltransferase 38, NatC auxiliary subunit-like [Sus scrofa] >gi|311275562|ref|XP_003134801.1| PREDICTED: N-alpha-acetyltransferase 38, NatC auxiliary subunit-like [Sus scrofa]	sp|P52630|STAT2_HUMAN	1	1.61123	2.0378	2.61987	3.68143
gi|343488474|ref|NP_001230453.1| elongation factor 1-beta [Sus scrofa]	sp|Q5TM61|PP1RA_MACMU	1	0.972426	1.84926	2.04596	3.69669
gi|350585327|ref|XP_003356027.2| PREDICTED: peptidoglycan recognition protein 1-like [Sus scrofa]	sp|Q5NVE0|RL15_PONAB	1	1.12222	0.944444	1.23333	3.85556
gi|311262067|ref|XP_003128996.1| PREDICTED: glucosamine-6-phosphate isomerase 2-like isoform 1 [Sus scrofa] >gi|311262065|ref|XP_003128997.1| PREDICTED: glucosamine-6-phosphate isomerase 2-like isoform 2 [Sus scrofa]	sp|P09417|DHPR_HUMAN	1	2.3802	2.59604	2.34653	3.86139
gi|194040450|ref|XP_001927992.1| PREDICTED: lactoylglutathione lyase isoform 1 [Sus scrofa]	sp|P42224|STAT1_HUMAN	1	1.31961	1.12265	2.21038	3.87019
gi|311275507|ref|XP_003134773.1| PREDICTED: neural Wiskott-Aldrich syndrome protein-like [Sus scrofa]	sp|P20811|ICAL_BOVIN	1	2.0501	1.46464	1.55305	3.90963
gi|297747284|ref|NP_001172109.1| prefoldin subunit 6 [Sus scrofa] >gi|297747282|ref|NP_001172108.1| prefoldin subunit 6 [Sus scrofa]	sp|Q16836|HCDH_HUMAN	1	1.24498	1.81592	2.06021	3.98754
gi|335297068|ref|XP_001927259.3| PREDICTED: CLYBL protein [Sus scrofa]	sp|P46406|G3P_RABIT	1	2.22309	3.82063	3.80045	4.12332
gi|54036319|sp|Q6QAP7.3|RS17_PIG RecName: Full=40S ribosomal protein S17 >gi|48675931|ref|NP_001001634.1| 40S ribosomal protein S17 [Sus scrofa] >gi|45269037|gb|AAS55931.1| 40S ribosomal protein S17 [Sus scrofa]	sp|O77592|S35A3_CANFA	1	0.97066	1.6467	2.01467	4.2066
gi|335294095|ref|XP_003357133.1| PREDICTED: phosphatidylinositol N-acetylglucosaminyltransferase subunit Y-like isoform 2 [Sus scrofa]	sp|P20004|ACON_BOVIN	1	1.12206	1.92228	2.02682	4.64094
gi|80975533|gb|ABB54390.1| tropomyosin 3 [Sus scrofa]	sp|P40306|PSB10_HUMAN	1	0.778905	2.3783	2.857	4.93002
gi|350587379|ref|XP_003482398.1| PREDICTED: putative aminopeptidase C13A11.05-like [Sus scrofa]	sp|O60664|PLIN3_HUMAN	1	0.864103	0.633333	6.43333	5.02564
gi|350580256|ref|XP_003480773.1| PREDICTED: nucleobindin-2 [Sus scrofa]	sp|P61212|ARL1_RAT	1	1.15957	2.95021	3.4871	5.05999
gi|350587377|ref|XP_003356918.2| PREDICTED: cytosol aminopeptidase-like [Sus scrofa]	sp|Q3T0D7|SAR1A_BOVIN	1	0.87237	0.762973	5.82328	5.20617
gi|346644743|ref|NP_001231138.1| calmodulin 3 [Sus scrofa] >gi|346644746|ref|NP_001231139.1| calmodulin 1 [Sus scrofa] >gi|311252670|ref|XP_003125211.1| PREDICTED: calmodulin-like [Sus scrofa]	sp|Q9Y6K5|OAS3_HUMAN	1	1.34185	2.00705	2.08194	5.33568
gi|18699289|gb|AAL78511.1|AF464049_1 MHC class I antigen [Sus scrofa]	sp|Q2HJ74|GATM_BOVIN	1	1.11888	1.16608	1.88287	5.52535
gi|311259195|ref|XP_003127983.1| PREDICTED: plasminogen activator inhibitor 1 RNA-binding protein-like isoform 2 [Sus scrofa]	sp|Q2TBV3|ETFB_BOVIN	1	1.00718	3.41113	3.33932	5.97307
gi|178056556|ref|NP_001116620.1| probable aminopeptidase NPEPL1 [Sus scrofa] >gi|147223400|emb|CAN13197.1| aminopeptidase-like 1 [Sus scrofa]	sp|P14923|PLAK_HUMAN	1	0.729805	1.7493	3.76741	6.10724
gi|349732201|ref|NP_001231854.1| dpy-30 homolog [Sus scrofa]	sp|P63004|LIS1_RAT	1	1.55908	3.3925	3.63509	7.98594
gi|190360639|ref|NP_001121941.1| interferon-induced 17 kDa protein [Sus scrofa] >gi|182406743|gb|ACB87600.1| interferon stimulated gene 15 [Sus scrofa]	sp|P26452|RSSA_BOVIN	1	1.78256	2.0841	3.54359	9.83487

## Sheet: bin 0
Gene	GWEIGHT	114	115	116	117	118
EWEIGHT		1	1	1	1	1
gi|171986635|gb|ACB59309.1| intelectin 2 [Sus scrofa]	1	0	1.59213	-0.154592	0.956226	-0.654296
gi|3913338|sp|O46658.3|CP2DP_PIG RecName: Full=Vitamin D(3) 25-hydroxylase; AltName: Full=CYPIID25; AltName: Full=Cytochrome P450 2D25 >gi|47523842|ref|NP_999559.1| vitamin D(3) 25-hydroxylase [Sus scrofa] >gi|2956688|emb|CAA76205.1| vitamin D3 25-Hydroxylase (CYP2D25) [Sus scrofa]	1	0	1.14492	0.397276	0.685675	-0.585765
gi|55977740|sp|Q29387.2|EF1G_PIG RecName: Full=Elongation factor 1-gamma; Short=EF-1-gamma; AltName: Full=eEF-1B gamma >gi|19111049|gb|AAL85414.1|AF480162_1 eukaryotic elongation factor 1 gamma-like protein [Sus scrofa]	1	0	0.972267	0.551619	0.470377	-0.4834
gi|311254039|ref|XP_003125724.1| PREDICTED: mucosal pentraxin-like [Sus scrofa]	1	0	0.334481	1.61585	1.57774	-0.360256
gi|93359412|gb|ABF13285.1| proliferating cell nuclear antigen [Sus scrofa]	1	0	0.95288	0.805765	0.736224	-0.318224
gi|156120152|ref|NP_001095294.1| complement factor B precursor [Sus scrofa] >gi|148724909|emb|CAN87697.1| B-factor, properdin [Sus scrofa]	1	0	0.922451	0.302618	0.56234	-0.308219
gi|335293373|ref|XP_003356947.1| PREDICTED: UDP-glucose 6-dehydrogenase-like isoform 1 [Sus scrofa]	1	0	0.713226	0.600575	0.875442	-0.298573
gi|335307327|ref|XP_003127745.2| PREDICTED: heterogeneous nuclear ribonucleoprotein R [Sus scrofa]	1	0	0.789891	0.486689	0.576839	-0.295657
gi|194038973|ref|XP_001929258.1| PREDICTED: purine nucleoside phosphorylase [Sus scrofa]	1	0	0.552541	0.478363	0.920147	-0.294447
gi|335288215|ref|XP_003355555.1| PREDICTED: N-acetylglucosamine-6-sulfatase, partial [Sus scrofa]	1	0	0.561427	0.313499	0.679822	-0.227069
gi|350594202|ref|XP_003133916.3| PREDICTED: threonyl-tRNA synthetase, cytoplasmic-like [Sus scrofa]	1	0	0.903579	0.180689	0.839594	-0.208895
gi|350586271|ref|XP_003482146.1| PREDICTED: E3 ubiquitin-protein ligase HECTD3-like, partial [Sus scrofa]	1	0	1.07522	0.416387	1.11365	-0.195115
gi|509403|emb|CAA84355.1| BAT1 [Sus scrofa]	1	0	1.98113	0.994633	0.596817	-0.174396
gi|350579496|ref|XP_003353657.2| PREDICTED: proteasome-associated protein ECM29 homolog [Sus scrofa]	1	0	1.02428	0.492941	0.226154	-0.16124
gi|350582355|ref|XP_003354851.2| PREDICTED: exportin-1 [Sus scrofa]	1	0	1.0598	0.168526	0.436592	-0.026682
gi|116175275|ref|NP_001070689.1| transformer-2 protein homolog beta [Sus scrofa] >gi|115371737|gb|ABI96193.1| TRA2B [Sus scrofa]	1	0	1.28042	0.644812	0.608679	-0.013346
gi|350591502|ref|XP_003483285.1| PREDICTED: ruvB-like 1-like [Sus scrofa]	1	0	0.61891	0.244111	0.552098	0.011098
gi|47523892|ref|NP_999584.1| epithelial cell adhesion molecule precursor [Sus scrofa] >gi|75045149|sp|Q75QW1.1|EPCAM_PIG RecName: Full=Epithelial cell adhesion molecule; Short=Ep-CAM; AltName: Full=Tumor-associated calcium signal transducer 1; AltName: CD_antigen=CD326; Flags:	1	0	1.03648	0.430509	0.226276	0.023145
gi|350586543|ref|XP_003482212.1| PREDICTED: glutamate--cysteine ligase catalytic subunit isoform 2 [Sus scrofa]	1	0	0.630192	0.914833	0.940197	0.043001
gi|1907268|emb|CAA62960.1| proteasome subunit C9-like protein [Sus scrofa]	1	0	0.980228	0.341175	0.957487	0.053963
gi|311268173|ref|XP_003131919.1| PREDICTED: myb-binding protein 1A [Sus scrofa]	1	0	0.851477	0.806279	0.773629	0.099368
gi|350595984|ref|XP_003360563.2| PREDICTED: glucose-6-phosphate 1-dehydrogenase-like, partial [Sus scrofa]	1	0	0.874018	0.185812	0.513251	0.121946
gi|47523756|ref|NP_999514.1| pyruvate carboxylase, mitochondrial [Sus scrofa] >gi|300632138|emb|CBU89073.1| unnamed protein product [Sus scrofa] >gi|300628626|emb|CBU85988.1| unnamed protein product [Sus scrofa] >gi|300641281|emb|CBU93285.1| unnamed protein product [Sus scrofa]	1	0	0.964528	1.52063	0.330127	0.127787
gi|311245734|ref|XP_003121939.1| PREDICTED: hypothetical protein LOC100038023 [Sus scrofa] >gi|311245732|ref|XP_003121938.1| PREDICTED: hypothetical protein LOC100038023 [Sus scrofa]	1	0	0.866837	0.510058	0.754888	0.132224
gi|345199288|ref|NP_001230831.1| protein phosphatase 1, regulatory (inhibitor) subunit 7 [Sus scrofa]	1	0	1.51964	0.755242	1.31386	0.140461
gi|1236646|gb|AAC48775.1| ch4 and secrete domains of swine IgM [Sus scrofa]	1	0	1.18397	-0.046096	0.864537	0.146549
gi|311244872|ref|XP_003121596.1| PREDICTED: creatine kinase U-type, mitochondrial-like isoform 2 [Sus scrofa] >gi|311244870|ref|XP_003121595.1| PREDICTED: creatine kinase U-type, mitochondrial-like isoform 1 [Sus scrofa]	1	0	0.506516	0.809922	1.11575	0.149122
gi|346716314|ref|NP_001231169.1| Rho GDP dissociation inhibitor (GDI) beta [Sus scrofa]	1	0	1.085	0.375291	0.066401	0.151219
gi|350597081|ref|XP_003484354.1| PREDICTED: LOW QUALITY PROTEIN: apolipoprotein B-100 [Sus scrofa]	1	0	1.05482	-0.005012	0.585518	0.153337
gi|350591186|ref|XP_003483226.1| PREDICTED: mitochondrial carnitine/acylcarnitine carrier protein-like [Sus scrofa]	1	0	1.08585	-0.099269	0.440966	0.164655
gi|311260172|ref|XP_003128373.1| PREDICTED: antigen peptide transporter 2 [Sus scrofa]	1	0	0.567732	0.425866	1.04922	0.180572
gi|350583566|ref|XP_001925705.3| PREDICTED: seryl-tRNA synthetase, cytoplasmic [Sus scrofa]	1	0	0.928752	0.298844	0.309443	0.194076
gi|350590194|ref|XP_003483009.1| PREDICTED: 26S proteasome non-ATPase regulatory subunit 12-like [Sus scrofa]	1	0	1.12894	0.554948	0.870303	0.20404
gi|350578774|ref|XP_003480447.1| PREDICTED: EH domain-containing protein 4, partial [Sus scrofa]	1	0	0.28552	0.798769	0.925514	0.215793
gi|11055649|gb|AAG28195.1|AF304201_6 ATPase 6 [Sus scrofa]	1	0	1.59057	1.2867	0.96879	0.218377
gi|194041525|ref|XP_001927836.1| PREDICTED: dihydropyrimidinase-related protein 2-like isoform 2 [Sus scrofa]	1	0	0.852294	0.440471	0.705644	0.225432
gi|58332862|ref|NP_001011507.1| lysosome-associated membrane glycoprotein 1 precursor [Sus scrofa] >gi|57282794|emb|CAF04757.1| lysosome-associated membrane glycoprotein 1 [Sus scrofa]	1	0	1.44131	-0.14595	0.614296	0.248666
gi|335281676|ref|XP_003353867.1| PREDICTED: heterogeneous nuclear ribonucleoprotein U-like 2 [Sus scrofa]	1	0	0.926586	-0.030057	0.755438	0.254956
gi|251764755|sp|A6M931.1|IF4A3_PIG RecName: Full=Eukaryotic initiation factor 4A-III; Short=eIF-4A-III; Short=eIF4A-III; AltName: Full=ATP-dependent RNA helicase DDX48; AltName: Full=ATP-dependent RNA helicase eIF4A-3; AltName: Full=DEAD box protein 48; AltName: Full=Eukaryotic trans	1	0	0.912728	0.373637	0.591071	0.260652
gi|345441801|ref|NP_001230874.1| TNF receptor-associated protein 1 [Sus scrofa]	1	0	0.778863	0.319212	0.571331	0.2825
gi|335284678|ref|XP_003354674.1| PREDICTED: dnaJ homolog subfamily A member 3, mitochondrial isoform 1 [Sus scrofa]	1	0	0.97017	0.343471	0.237813	0.283109
gi|4809241|gb|AAD30159.1| hypoxanthine phosphoribosyltransferase [Sus scrofa]	1	0	0.47022	0.852036	1.0488	0.289807
gi|311257281|ref|XP_003127042.1| PREDICTED: dnaJ homolog subfamily A member 2-like [Sus scrofa]	1	0	0.385407	1.11509	0.846054	0.338802
gi|350581931|ref|XP_003354725.2| PREDICTED: isoleucyl-tRNA synthetase, cytoplasmic-like [Sus scrofa]	1	0	0.841773	0.257488	0.697883	0.360138
gi|251823933|ref|NP_001156532.1| cadherin-1 precursor [Sus scrofa] >gi|209875157|gb|ACI94878.1| E-cadherin [Sus scrofa]	1	0	0.740833	0.729199	0.583886	0.360776
gi|350588052|ref|XP_003357166.2| PREDICTED: importin-7, partial [Sus scrofa]	1	0	0.822496	0.148976	0.844313	0.374519
gi|190360605|ref|NP_001121929.1| pre-mRNA-processing factor 19 [Sus scrofa] >gi|356995561|dbj|BAL14717.1| nuclear matrix protein 200 [Sus scrofa] >gi|171920012|gb|ACB59178.1| pre-mRNA processing factor 19 [Sus scrofa]	1	0	0.765621	0.599023	0.800448	0.375022
gi|5542425|pdb|1QPW|D Chain D, Crystal Structure Determination Of Porcine Hemoglobin At 1.8a Resolution >gi|5542423|pdb|1QPW|B Chain B, Crystal Structure Determination Of Porcine Hemoglobin At 1.8a Resolution >gi|809285|pdb|2PGH|D Chain D, Structure Determination Of Aquo	1	0	1.79696	0.911361	0.665931	0.429074
gi|311254645|ref|XP_003125912.1| PREDICTED: EPS8-like 3 [Sus scrofa]	1	0	0.929323	0.628369	0.725424	0.437847
gi|47523456|ref|NP_999349.1| serine/threonine-protein phosphatase PP1-beta catalytic subunit [Sus scrofa] >gi|47116968|sp|P61292.3|PP1B_PIG RecName: Full=Serine/threonine-protein phosphatase PP1-beta catalytic subunit; Short=PP-1B >gi|89257972|gb|ABD65256.1| protein phosphatase	1	0	0.641929	0.412961	0.728641	0.454745
gi|47523694|ref|NP_999483.1| calpain small subunit 1 [Sus scrofa] >gi|115613|sp|P04574.1|CPNS1_PIG RecName: Full=Calpain small subunit 1; Short=CSS1; AltName: Full=Calcium-activated neutral proteinase small subunit; Short=CANP small subunit; AltName: Full=Calcium-dependent prot	1	0	1.15044	0.919638	1.31925	0.475181
gi|350276234|ref|NP_001231897.1| anterior gradient protein 2 homolog precursor [Sus scrofa]	1	0	0.901945	0.763966	0.626811	0.481613
gi|311249255|ref|XP_003123541.1| PREDICTED: procollagen galactosyltransferase 1-like [Sus scrofa]	1	0	1.47059	1.20181	0.620296	0.487696
gi|335282254|ref|XP_003354010.1| PREDICTED: DNA-directed RNA polymerases I, II, and III subunit RPABC1-like isoform 1 [Sus scrofa] >gi|335282256|ref|XP_003354011.1| PREDICTED: DNA-directed RNA polymerases I, II, and III subunit RPABC1-like isoform 2 [Sus scrofa]	1	0	1.49264	0.629817	1.04731	0.542149
gi|350590014|ref|XP_003357929.2| PREDICTED: serine/threonine-protein kinase 24 [Sus scrofa]	1	0	2.40786	1.17628	0.827305	0.59189
gi|308081427|ref|NP_001183950.1| hydroxysteroid dehydrogenase-like protein 2 [Sus scrofa]	1	0	0.891278	0.276812	0.524111	0.596353
gi|194036316|ref|XP_001927895.1| PREDICTED: RNA-binding protein 8A [Sus scrofa]	1	0	0.914476	1.01834	0.794839	0.603851
gi|194033405|ref|XP_001928380.1| PREDICTED: acetyl-CoA acetyltransferase, cytosolic [Sus scrofa]	1	0	0.520332	0.569306	1.15612	0.634483
gi|198282077|ref|NP_001128296.1| cytochrome P450 3A46 [Sus scrofa] >gi|197791176|gb|ABS58488.2| cytochrome P450 [Sus scrofa]	1	0	1.77835	1.45496	1.02436	0.636153
gi|2498311|sp|Q28943.1|DPYD_PIG RecName: Full=Dihydropyrimidine dehydrogenase [NADP(+)]; Short=DHPDHase; Short=DPD; AltName: Full=Dihydrothymine dehydrogenase; AltName: Full=Dihydrouracil dehydrogenase; Flags: Precursor >gi|47522904|ref|NP_999209.1| dihydropyrimidine dehydrogenase	1	0	0.692956	0.891716	0.533373	0.653399
gi|47523784|ref|NP_999528.1| 40S ribosomal protein S12 [Sus scrofa] >gi|1173191|sp|P46405.2|RS12_PIG RecName: Full=40S ribosomal protein S12 >gi|872315|emb|CAA55946.1| 40S ribosomal protein S12 [Sus scrofa]	1	0	0.582416	0.740016	0.835789	0.656926
gi|350583970|ref|XP_003126216.3| PREDICTED: keratin, type II cytoskeletal 75-like [Sus scrofa]	1	0	1.13851	0.782965	-0.024123	0.662578
gi|350582325|ref|XP_003354840.2| PREDICTED: calcineurin subunit B type 1-like [Sus scrofa] >gi|335306878|ref|XP_003125129.2| PREDICTED: calcineurin subunit B type 1-like [Sus scrofa]	1	0	0.64928	0.571965	0.937192	0.674834
gi|47523158|ref|NP_999015.1| glutathione S-transferase A2 [Sus scrofa] >gi|1185280|emb|CAA93434.1| glutathione S-transferase [Sus scrofa]	1	0	1.37918	0.969396	1.64981	0.764389
gi|1839536|gb|AAB47145.1| dipeptidyl peptidase II, DPP II, dipeptidyl aminopeptidase II {N-terminal} [swine, seminal plasma, Peptide Partial, 41 aa] >gi|1881845|gb|AAB49532.1| dipeptidyl-peptidase II, DPP II {N-terminal} {EC 3.4.14.2} [swine, seminal plasma, Peptide Partial,	1	0	1	0.335867	0.844881	0.837061
gi|47523628|ref|NP_999442.1| aminopeptidase N [Sus scrofa] >gi|1703286|sp|P15145.3|AMPN_PIG RecName: Full=Aminopeptidase N; Short=AP-N; Short=pAPN; AltName: Full=Alanyl aminopeptidase; AltName: Full=Aminopeptidase M; Short=AP-M; AltName: Full=Microsomal aminopeptidase; AltName:	1	0	1.68887	0.9277	1.40138	0.894892
gi|47115532|sp|Q9XT00.2|DHB8_PIG RecName: Full=Estradiol 17-beta-dehydrogenase 8; AltName: Full=17-beta-hydroxysteroid dehydrogenase 8; Short=17-beta-HSD 8; AltName: Full=3-oxoacyl-[acyl-carrier-protein] reductase; AltName: Full=Protein Ke6; Short=Ke-6; AltName: Full=Testosterone 1	1	0	1.08859	0.60328	1.04963	1.16135
gi|171986635|gb|ACB59309.1|	intelectin 2 [Sus scrofa]|171986635|gb|ACB59309.1|	GO:0005576	GO:0007165	GO:0030246	GO:0005102
gi|3913338|sp|O46658.3|CP2DP_PIG	RecName: Full=Vitamin D(3) 25-hydroxylase; AltName: Full=CYPIID25; AltName: Full=Cytochrome P450 2D25 >gi|47523842|ref|NP_999559.1| vitamin D(3) 25-hydroxylase [Sus scrofa] >gi|2956688|emb|CAA76205.1| vitamin D3 25-Hydroxylase (CYP2D25) [Sus scrofa]|3913338|sp|O46658.3|CP2DP_PIG	GO:0047749	GO:0008144	GO:0051100	GO:0042737	GO:0090350	GO:0009804	GO:0005739	GO:0070989	GO:0009822	GO:0006805	GO:0070330	GO:0009055	GO:0020037	GO:0033076	GO:0008202	GO:0044281	GO:0005789	GO:0005506	GO:0016098
gi|55977740|sp|Q29387.2|EF1G_PIG	RecName: Full=Elongation factor 1-gamma; Short=EF-1-gamma; AltName: Full=eEF-1B gamma >gi|19111049|gb|AAL85414.1|AF480162_1 eukaryotic elongation factor 1 gamma-like protein [Sus scrofa]|55977740|sp|Q29387.2|EF1G_PIG	GO:0003746	GO:0005853	GO:0005515	GO:0005829	GO:0009615	GO:0006414
gi|311254039|ref|XP_003125724.1|	PREDICTED: mucosal pentraxin-like [Sus scrofa]|311254039|ref|XP_003125724.1|	GO:0005576	GO:0046872
gi|93359412|gb|ABF13285.1|	proliferating cell nuclear antigen [Sus scrofa]|93359412|gb|ABF13285.1|	GO:0032139	GO:0005654	GO:0000122	GO:0006275	GO:0032405	GO:0000701	GO:0005652	GO:0019985	GO:0007507	GO:0030337	GO:0030971	GO:0015630	GO:0006283	GO:0006297	GO:0008283	GO:0006287	GO:0005737	GO:0005730	GO:0032077	GO:0070557	GO:0042802	GO:0000722	GO:0048015	GO:0000084	GO:0046686	GO:0005663	GO:0000083	GO:0000307	GO:0032201	GO:0033993	GO:0043626	GO:0008134	GO:0006298	GO:0043596	GO:0006271
gi|156120152|ref|NP_001095294.1|	complement factor B precursor [Sus scrofa] >gi|148724909|emb|CAN87697.1| B-factor, properdin [Sus scrofa]|156120152|ref|NP_001095294.1|	GO:0004252	GO:0006957	GO:0030449	GO:0005886	GO:0001848	GO:0005576	GO:0006508
gi|335293373|ref|XP_003356947.1|	PREDICTED: UDP-glucose 6-dehydrogenase-like isoform 1 [Sus scrofa]|335293373|ref|XP_003356947.1|	GO:0001702	GO:0003979	GO:0005829	GO:0051287	GO:0006024	GO:0055114	GO:0006805	GO:0009055	GO:0006011	GO:0006065
gi|335307327|ref|XP_003127745.2|	PREDICTED: heterogeneous nuclear ribonucleoprotein R [Sus scrofa]|335307327|ref|XP_003127745.2|	GO:0005737	GO:0005730	GO:0005654	GO:0003723	GO:0000398	GO:0005515	GO:0000166	GO:0071013
gi|194038973|ref|XP_001929258.1|	PREDICTED: purine nucleoside phosphorylase [Sus scrofa]|194038973|ref|XP_001929258.1|	GO:0006148	GO:0006738	GO:0008144	GO:0006955	GO:0042301	GO:0042102	GO:0006144	GO:0005576	GO:0006195	GO:0005829	GO:0005856	GO:0005179	GO:0042493	GO:0002060	GO:0001664	GO:0001882	GO:0004731	GO:0007586	GO:0070970	GO:0034418	GO:0043101	GO:0034356	GO:0046638
gi|335288215|ref|XP_003355555.1|	PREDICTED: N-acetylglucosamine-6-sulfatase, partial [Sus scrofa]|335288215|ref|XP_003355555.1|	GO:0042340	GO:0046872	GO:0005975	GO:0008449	GO:0005515	GO:0044281	GO:0043202
gi|350594202|ref|XP_003133916.3|	PREDICTED: threonyl-tRNA synthetase, cytoplasmic-like [Sus scrofa]|350594202|ref|XP_003133916.3|	GO:0005737	GO:0004829	GO:0005524	GO:0006435	GO:0015629
gi|350586271|ref|XP_003482146.1|	PREDICTED: E3 ubiquitin-protein ligase HECTD3-like, partial [Sus scrofa]|350586271|ref|XP_003482146.1|	GO:0019905	GO:0042787	GO:0043161	GO:0004842	GO:0005634	GO:0048471
gi|509403|emb|CAA84355.1|	BAT1 [Sus scrofa]|509403|emb|CAA84355.1|	GO:0005687	GO:0043008	GO:0010501	GO:0004004	GO:0005681	GO:0000245	GO:0016607	GO:0005524	GO:0005688	GO:0030621	GO:0000346	GO:0017070	GO:0005737	GO:0046784
gi|350579496|ref|XP_003353657.2|	PREDICTED: proteasome-associated protein ECM29 homolog [Sus scrofa]|350579496|ref|XP_003353657.2|	GO:0005769	GO:0030134	GO:0005771	GO:0030139	GO:0005793	GO:0005813	GO:0000502	GO:0030433	GO:0005634	GO:0005783	GO:0005802
gi|350582355|ref|XP_003354851.2|	PREDICTED: exportin-1 [Sus scrofa]|350582355|ref|XP_003354851.2|	GO:0042176	GO:0000122	GO:0051028	GO:0015030	GO:0030512	GO:0000236	GO:0046825	GO:0008565	GO:0034504	GO:0005730	GO:0005829	GO:0000776	GO:0019904	GO:0005635	GO:0019048	GO:0019058	GO:0042493	GO:0003723	GO:0005642	GO:0010824	GO:0016071	GO:0030529
gi|116175275|ref|NP_001070689.1|	transformer-2 protein homolog beta [Sus scrofa] >gi|115371737|gb|ABI96193.1| TRA2B [Sus scrofa]|116175275|ref|NP_001070689.1|	GO:0003729	GO:0000302	GO:0000381	GO:0048026	GO:0005515	GO:0005634
gi|350591502|ref|XP_003483285.1|	PREDICTED: ruvB-like 1-like [Sus scrofa]|350591502|ref|XP_003483285.1|	GO:0043967	GO:0032508	GO:0005515	GO:0016020	GO:0005815	GO:0006357	GO:0006310	GO:0007283	GO:0051301	GO:0005794	GO:0005730	GO:0040008	GO:0007067	GO:0031011	GO:0016363	GO:0035267	GO:0034080	GO:0016887	GO:0043968	GO:0005524	GO:0030529	GO:0003678	GO:0071339	GO:0006281
gi|47523892|ref|NP_999584.1|	epithelial cell adhesion molecule precursor [Sus scrofa] >gi|75045149|sp|Q75QW1.1|EPCAM_PIG RecName: Full=Epithelial cell adhesion molecule; Short=Ep-CAM; AltName: Full=Tumor-associated calcium signal transducer 1; AltName: CD_antigen=CD326; Flags: |47523892|ref|NP_999584.1|	GO:0001657	GO:0016323	GO:0009986	GO:0005923	GO:0016324	GO:0008284	GO:0016328	GO:0005515	GO:0016021
gi|350586543|ref|XP_003482212.1|	PREDICTED: glutamate--cysteine ligase catalytic subunit isoform 2 [Sus scrofa]|350586543|ref|XP_003482212.1|	GO:0051900	GO:0051409	GO:0019852	GO:0043531	GO:0046685	GO:0045892	GO:0005829	GO:0006916	GO:0046982	GO:0032436	GO:0006534	GO:0045454	GO:0016595	GO:0050662	GO:0006805	GO:0000287	GO:0017109	GO:0009408	GO:0006536	GO:0031397	GO:0043524	GO:0006750	GO:0009725	GO:0050880	GO:0005524	GO:0006979	GO:0004357
gi|1907268|emb|CAA62960.1|	proteasome subunit C9-like protein [Sus scrofa]|1907268|emb|CAA62960.1|	GO:0000209	GO:0005654	GO:0005515	GO:0006521	GO:0051437	GO:0042981	GO:0010467	GO:0051436	GO:0004298	GO:0005829	GO:0002479	GO:0019773	GO:0019048	GO:0000084	GO:0000216	GO:0031145	GO:0016071	GO:0006977
gi|311268173|ref|XP_003131919.1|	PREDICTED: myb-binding protein 1A [Sus scrofa]|311268173|ref|XP_003131919.1|	GO:0005730	GO:0071158	GO:0042149	GO:0006913	GO:0072332	GO:0042564	GO:0008134	GO:0006351	GO:0005737
gi|350595984|ref|XP_003360563.2|	PREDICTED: glucose-6-phosphate 1-dehydrogenase-like, partial [Sus scrofa]|350595984|ref|XP_003360563.2|	GO:0010734	GO:0001998	GO:0032094	GO:0045471	GO:0043249	GO:0050661	GO:0004345	GO:0051156	GO:0005536	GO:0019322	GO:0005829	GO:0046390	GO:0009051	GO:0006695	GO:0014070	GO:0005813	GO:0006741	GO:0006749	GO:0032615	GO:0002033	GO:0042803	GO:0045767	GO:0040014	GO:0005634	GO:0032613	GO:0034599	GO:0009898
gi|47523756|ref|NP_999514.1|	pyruvate carboxylase, mitochondrial [Sus scrofa] >gi|300632138|emb|CBU89073.1| unnamed protein product [Sus scrofa] >gi|300628626|emb|CBU85988.1| unnamed protein product [Sus scrofa] >gi|300641281|emb|CBU93285.1| unnamed protein product [Sus scrofa]|47523756|ref|NP_999514.1|	GO:0006107	GO:0004736	GO:0008610	GO:0005743	GO:0006090	GO:0046872	GO:0009374	GO:0005524	GO:0006094	GO:0005759	GO:0004075
gi|311245734|ref|XP_003121939.1|	PREDICTED: hypothetical protein LOC100038023 [Sus scrofa] >gi|311245732|ref|XP_003121938.1| PREDICTED: hypothetical protein LOC100038023 [Sus scrofa]|311245734|ref|XP_003121939.1|	GO:0000184	GO:0006413	GO:0006415	GO:0006924	GO:0007369	GO:0008286	GO:0043066	GO:0005844	GO:0019901	GO:0000028	GO:0048821	GO:0006414	GO:0031929	GO:0001890	GO:0005730	GO:0002309	GO:0022605	GO:0007067	GO:0043065	GO:0033077	GO:0003735	GO:0019083	GO:0031575	GO:0006614	GO:0048471	GO:0006364	GO:0042593	GO:0022627
gi|345199288|ref|NP_001230831.1|	protein phosphatase 1, regulatory (inhibitor) subunit 7 [Sus scrofa]|345199288|ref|NP_001230831.1|	GO:0005737	GO:0005634	GO:0050790	GO:0008599
gi|1236646|gb|AAC48775.1|	ch4 and secrete domains of swine IgM [Sus scrofa]|1236646|gb|AAC48775.1|	GO:0006955	GO:0005886
gi|311244872|ref|XP_003121596.1|	PREDICTED: creatine kinase U-type, mitochondrial-like isoform 2 [Sus scrofa] >gi|311244870|ref|XP_003121595.1| PREDICTED: creatine kinase U-type, mitochondrial-like isoform 1 [Sus scrofa]|311244872|ref|XP_003121596.1|	GO:0005743	GO:0004111	GO:0006600	GO:0016310	GO:0034641	GO:0005524
gi|346716314|ref|NP_001231169.1|	Rho GDP dissociation inhibitor (GDI) beta [Sus scrofa]|346716314|ref|NP_001231169.1|	GO:0005856	GO:0005096	GO:0051056	GO:0006928	GO:0007266	GO:0005094	GO:0016023	GO:0007275	GO:0005829	GO:0007162	GO:0006955	GO:0030036
gi|350597081|ref|XP_003484354.1|	PREDICTED: LOW QUALITY PROTEIN: apolipoprotein B-100 [Sus scrofa]|350597081|ref|XP_003484354.1|	GO:0010886	GO:0042953	GO:0009615	GO:0030669	GO:0032496	GO:0045540	GO:0010269	GO:0042159	GO:0034374	GO:0048844	GO:0034360	GO:0005788	GO:0006898	GO:0010744	GO:0071356	GO:0009566	GO:0034383	GO:0034361	GO:0007283	GO:0009791	GO:0005789	GO:0050750	GO:0005543	GO:0050900	GO:0031904	GO:0034379	GO:0019433	GO:0030317	GO:0046982	GO:0034363	GO:0008201	GO:0007596	GO:0042158	GO:0030301	GO:0007399	GO:0034359	GO:0009743	GO:0019899	GO:0005886	GO:0071379	GO:0034362	GO:0017127	GO:0010008	GO:0001701	GO:0006642	GO:0042632	GO:0031983
gi|350591186|ref|XP_003483226.1|	PREDICTED: mitochondrial carnitine/acylcarnitine carrier protein-like [Sus scrofa]|350591186|ref|XP_003483226.1|	GO:0006853	GO:0016021	GO:0046320	GO:0005743
gi|311260172|ref|XP_003128373.1|	PREDICTED: antigen peptide transporter 2 [Sus scrofa]|311260172|ref|XP_003128373.1|	GO:0001916	GO:0046979	GO:0002485	GO:0042825	GO:0019060	GO:0002489	GO:0046968	GO:0005743	GO:0042288	GO:0002479	GO:0015433	GO:0046978	GO:0046967	GO:0015421	GO:0055085	GO:0042605	GO:0005886	GO:0002481	GO:0005634	GO:0005524	GO:0002591	GO:0046980
gi|350583566|ref|XP_001925705.3|	PREDICTED: seryl-tRNA synthetase, cytoplasmic [Sus scrofa]|350583566|ref|XP_001925705.3|	GO:0005829	GO:0004828	GO:0003723	GO:0097056	GO:0005739	GO:0006434	GO:0008033	GO:0005524
gi|350590194|ref|XP_003483009.1|	PREDICTED: 26S proteasome non-ATPase regulatory subunit 12-like [Sus scrofa]|350590194|ref|XP_003483009.1|	GO:0000209	GO:0005654	GO:0006521	GO:0051437	GO:0042981	GO:0010467	GO:0016032	GO:0051436	GO:0005829	GO:0002479	GO:0000084	GO:0000216	GO:0031145	GO:0016071	GO:0005838	GO:0006977
gi|350578774|ref|XP_003480447.1|	PREDICTED: EH domain-containing protein 4, partial [Sus scrofa]|350578774|ref|XP_003480447.1|	GO:0030100	GO:0071363	GO:0055038	GO:0005515	GO:0032456	GO:0006907	GO:0005525	GO:0005509	GO:0006184	GO:0003676	GO:0050731	GO:0048471	GO:0051260	GO:0005783	GO:0003924	GO:0005886	GO:0031901	GO:0005524	GO:0005634
gi|11055649|gb|AAG28195.1|AF304201_6	ATPase 6 [Sus scrofa]|11055649|gb|AAG28195.1|AF304201_6	GO:0015078	GO:0005743	GO:0015986	GO:0045263
gi|194041525|ref|XP_001927836.1|	PREDICTED: dihydropyrimidinase-related protein 2-like isoform 2 [Sus scrofa]|194041525|ref|XP_001927836.1|	GO:0030154	GO:0030425	GO:0006208	GO:0016812	GO:0030424	GO:0007010	GO:0007399	GO:0019901	GO:0043025	GO:0005739
gi|58332862|ref|NP_001011507.1|	lysosome-associated membrane glycoprotein 1 precursor [Sus scrofa] >gi|57282794|emb|CAF04757.1| lysosome-associated membrane glycoprotein 1 [Sus scrofa]|58332862|ref|NP_001011507.1|	GO:0005887	GO:0005771	GO:0042383	GO:0005764	GO:0042470	GO:0009897	GO:0031090	GO:0009987	GO:0044446
gi|335281676|ref|XP_003353867.1|	PREDICTED: heterogeneous nuclear ribonucleoprotein U-like 2 [Sus scrofa]|335281676|ref|XP_003353867.1|	GO:0005634	GO:0003676
gi|251764755|sp|A6M931.1|IF4A3_PIG	RecName: Full=Eukaryotic initiation factor 4A-III; Short=eIF-4A-III; Short=eIF4A-III; AltName: Full=ATP-dependent RNA helicase DDX48; AltName: Full=ATP-dependent RNA helicase eIF4A-3; AltName: Full=DEAD box protein 48; AltName: Full=Eukaryotic trans|251764755|sp|A6M931.1|IF4A3_PIG	GO:0000184	GO:0006413	GO:0017148	GO:0051028	GO:0005515	GO:0016607	GO:0008143	GO:0003743	GO:0045727	GO:0035145	GO:0005829	GO:0019221	GO:0071013	GO:0048026	GO:0045944	GO:0000289	GO:0004004	GO:0006364	GO:0005524
gi|345441801|ref|NP_001230874.1|	TNF receptor-associated protein 1 [Sus scrofa]|345441801|ref|NP_001230874.1|	GO:0006457	GO:0034599	GO:0005524	GO:0051082	GO:0005164	GO:0005739
gi|335284678|ref|XP_003354674.1|	PREDICTED: dnaJ homolog subfamily A member 3, mitochondrial isoform 1 [Sus scrofa]|335284678|ref|XP_003354674.1|	GO:0043065	GO:0006264	GO:0019897	GO:0051082	GO:0008385	GO:0071340	GO:0032088	GO:0009790	GO:0030971	GO:0031594	GO:0005884	GO:0006924	GO:0033077	GO:0031398	GO:0030054	GO:0007569	GO:0042645	GO:0043124	GO:0006919	GO:0006469	GO:0009408	GO:0005083	GO:0033256	GO:0007264	GO:0008270	GO:0000122	GO:0005524	GO:0045211	GO:0043154	GO:0008285	GO:0019901	GO:0050821	GO:0051059	GO:0060336	GO:0043066	GO:0005634	GO:0006457	GO:0005133	GO:0031072	GO:0042102
gi|4809241|gb|AAD30159.1|	hypoxanthine phosphoribosyltransferase [Sus scrofa]|4809241|gb|AAD30159.1|	GO:0019835	GO:0046038	GO:0006168	GO:0045964	GO:0051289	GO:0001975	GO:0032869	GO:0021954	GO:0000166	GO:0006178	GO:0007625	GO:0004422	GO:0021895	GO:0021756	GO:0048813	GO:0032263	GO:0007283	GO:0046651	GO:0005829	GO:0032264	GO:0000287	GO:0052657	GO:0043103	GO:0006166	GO:0042803
gi|311257281|ref|XP_003127042.1|	PREDICTED: dnaJ homolog subfamily A member 2-like [Sus scrofa]|311257281|ref|XP_003127042.1|	GO:0001948	GO:0006457	GO:0008284	GO:0031072	GO:0005524	GO:0051082	GO:0016020	GO:0005634	GO:0005829	GO:0008270	GO:0009408	GO:0018885
gi|350581931|ref|XP_003354725.2|	PREDICTED: isoleucyl-tRNA synthetase, cytoplasmic-like [Sus scrofa]|350581931|ref|XP_003354725.2|	GO:0005829	GO:0004822	GO:0002161	GO:0008270	GO:0006428	GO:0005730	GO:0006450	GO:0005524	GO:0005515
gi|251823933|ref|NP_001156532.1|	cadherin-1 precursor [Sus scrofa] >gi|209875157|gb|ACI94878.1| E-cadherin [Sus scrofa]|251823933|ref|NP_001156532.1|	GO:0009986	GO:0070979	GO:0016235	GO:0051436	GO:0043296	GO:0030506	GO:0071681	GO:0005925	GO:0070306	GO:0006281	GO:0008284	GO:0005802	GO:0050776	GO:0051301	GO:0071230	GO:0007416	GO:0031572	GO:0042993	GO:0001829	GO:0000084	GO:0031175	GO:0007156	GO:0005829	GO:0015629	GO:0007605	GO:0005654	GO:0070830	GO:0031145	GO:0008013	GO:0072659	GO:0051260	GO:0016342	GO:0009898	GO:0050839	GO:0090344	GO:0006921	GO:0051488	GO:0033268	GO:0048471	GO:0016021	GO:0034332	GO:0019904	GO:0005794	GO:0005913	GO:0071285	GO:0043281	GO:0005680	GO:0090102
gi|350588052|ref|XP_003357166.2|	PREDICTED: importin-7, partial [Sus scrofa]|350588052|ref|XP_003357166.2|	GO:0008565	GO:0005083	GO:0008536	GO:0042393	GO:0006606	GO:0005643	GO:0007165	GO:0019048	GO:0005794
gi|190360605|ref|NP_001121929.1|	pre-mRNA-processing factor 19 [Sus scrofa] >gi|356995561|dbj|BAL14717.1| nuclear matrix protein 200 [Sus scrofa] >gi|171920012|gb|ACB59178.1| pre-mRNA processing factor 19 [Sus scrofa]|190360605|ref|NP_001121929.1|	GO:0000209	GO:0045665	GO:0016607	GO:0008610	GO:0034450	GO:0001833	GO:0000151	GO:0071013	GO:0005819	GO:0042802	GO:0000245	GO:0048026	GO:0003677	GO:0000974	GO:0045666	GO:0048711	GO:0005811	GO:0006281
gi|5542425|pdb|1QPW|D	Chain D, Crystal Structure Determination Of Porcine Hemoglobin At 1.8a Resolution >gi|5542423|pdb|1QPW|B Chain B, Crystal Structure Determination Of Porcine Hemoglobin At 1.8a Resolution >gi|809285|pdb|2PGH|D Chain D, Structure Determination Of Aquo|5542425|pdb|1QPW|D	GO:0015671	GO:0000015	GO:0005344	GO:0005833	GO:0005506	GO:0004634	GO:0020037	GO:0000287	GO:0006096	GO:0019825
gi|47523456|ref|NP_999349.1|	serine/threonine-protein phosphatase PP1-beta catalytic subunit [Sus scrofa] >gi|47116968|sp|P61292.3|PP1B_PIG RecName: Full=Serine/threonine-protein phosphatase PP1-beta catalytic subunit; Short=PP-1B >gi|89257972|gb|ABD65256.1| protein phosphatase|47523456|ref|NP_999349.1|	GO:0005981	GO:0030512	GO:0019901	GO:0017018	GO:0030155	GO:0051301	GO:0000164	GO:0050115	GO:0019433	GO:0005730	GO:0005829	GO:0046872	GO:0072357	GO:0005979	GO:0044281	GO:0070688	GO:0006470	GO:0001889	GO:0007049	GO:0042587
gi|47523694|ref|NP_999483.1|	calpain small subunit 1 [Sus scrofa] >gi|115613|sp|P04574.1|CPNS1_PIG RecName: Full=Calpain small subunit 1; Short=CSS1; AltName: Full=Calcium-activated neutral proteinase small subunit; Short=CANP small subunit; AltName: Full=Calcium-dependent prot|47523694|ref|NP_999483.1|	GO:0005737	GO:0008284	GO:0005886	GO:0004198	GO:0005509	GO:0006508	GO:0046982
gi|350276234|ref|NP_001231897.1|	anterior gradient protein 2 homolog precursor [Sus scrofa]|350276234|ref|NP_001231897.1|	GO:0005576	GO:0070254	GO:0005783	GO:0002162	GO:0005739
gi|311249255|ref|XP_003123541.1|	PREDICTED: procollagen galactosyltransferase 1-like [Sus scrofa]|311249255|ref|XP_003123541.1|	GO:0009103	GO:0005788	GO:0050211	GO:0030198
gi|335282254|ref|XP_003354010.1|	PREDICTED: DNA-directed RNA polymerases I, II, and III subunit RPABC1-like isoform 1 [Sus scrofa] >gi|335282256|ref|XP_003354011.1| PREDICTED: DNA-directed RNA polymerases I, II, and III subunit RPABC1-like isoform 2 [Sus scrofa]|335282254|ref|XP_003354010.1|	GO:0006385	GO:0006367	GO:0006370	GO:0003899	GO:0005515	GO:0004672	GO:0006283	GO:0006386	GO:0006468	GO:0019048	GO:0005665	GO:0003677	GO:0050434	GO:0000398	GO:0006368
gi|350590014|ref|XP_003357929.2|	PREDICTED: serine/threonine-protein kinase 24 [Sus scrofa]|350590014|ref|XP_003357929.2|	GO:0005654	GO:0030336	GO:0005515	GO:0006921	GO:0016020	GO:0008631	GO:0005829	GO:0046777	GO:0046872	GO:0004674	GO:0006917	GO:0048680	GO:0005524
gi|308081427|ref|NP_001183950.1|	hydroxysteroid dehydrogenase-like protein 2 [Sus scrofa]|308081427|ref|NP_001183950.1|	GO:0005777	GO:0016491	GO:0032934	GO:0005739	GO:0055114	GO:0000166
gi|194036316|ref|XP_001927895.1|	PREDICTED: RNA-binding protein 8A [Sus scrofa]|194036316|ref|XP_001927895.1|	GO:0035145	GO:0005829	GO:0003729	GO:0006369	GO:0006417	GO:0005730	GO:0000398	GO:0016607	GO:0031124	GO:0005515	GO:0000166	GO:0006406	GO:0071013	GO:0000184
gi|194033405|ref|XP_001928380.1|	PREDICTED: acetyl-CoA acetyltransferase, cytosolic [Sus scrofa]|194033405|ref|XP_001928380.1|	GO:0033344	GO:0003985	GO:0000062	GO:0034379	GO:0005739	GO:0005730	GO:0016021	GO:0005903	GO:0034736	GO:0030299	GO:0015485	GO:0034435	GO:0010742	GO:0042632	GO:0008203	GO:0005789
gi|198282077|ref|NP_001128296.1|	cytochrome P450 3A46 [Sus scrofa] >gi|197791176|gb|ABS58488.2| cytochrome P450 [Sus scrofa]|198282077|ref|NP_001128296.1|	GO:0005789	GO:0009055	GO:0005506	GO:0020037	GO:0070330	GO:0055114
gi|2498311|sp|Q28943.1|DPYD_PIG	RecName: Full=Dihydropyrimidine dehydrogenase [NADP(+)]; Short=DHPDHase; Short=DPD; AltName: Full=Dihydrothymine dehydrogenase; AltName: Full=Dihydrouracil dehydrogenase; Flags: Precursor >gi|47522904|ref|NP_999209.1| dihydropyrimidine dehydrogenase|2498311|sp|Q28943.1|DPYD_PIG	GO:0005829	GO:0055114	GO:0004158	GO:0006212	GO:0046872	GO:0006145	GO:0009055	GO:0017113	GO:0051539	GO:0006222	GO:0006210	GO:0050660	GO:0019483	GO:0050661	GO:0042803	GO:0006214	GO:0010181
gi|47523784|ref|NP_999528.1|	40S ribosomal protein S12 [Sus scrofa] >gi|1173191|sp|P46405.2|RS12_PIG RecName: Full=40S ribosomal protein S12 >gi|872315|emb|CAA55946.1| 40S ribosomal protein S12 [Sus scrofa]|47523784|ref|NP_999528.1|	GO:0006413	GO:0019083	GO:0005739	GO:0003735	GO:0006414	GO:0022627	GO:0006415	GO:0006614	GO:0000184
gi|350583970|ref|XP_003126216.3|	PREDICTED: keratin, type II cytoskeletal 75-like [Sus scrofa]|350583970|ref|XP_003126216.3|	GO:0005198	GO:0045095
gi|350582325|ref|XP_003354840.2|	PREDICTED: calcineurin subunit B type 1-like [Sus scrofa] >gi|335306878|ref|XP_003125129.2| PREDICTED: calcineurin subunit B type 1-like [Sus scrofa]|350582325|ref|XP_003354840.2|	GO:0005829	GO:0006470	GO:0008633	GO:0005516	GO:0001837	GO:0060487	GO:0005509	GO:0007507	GO:0005955	GO:0001569	GO:0051531	GO:0004723
gi|47523158|ref|NP_999015.1|	glutathione S-transferase A2 [Sus scrofa] >gi|1185280|emb|CAA93434.1| glutathione S-transferase [Sus scrofa]|47523158|ref|NP_999015.1|	GO:0005737	GO:0006749	GO:0004364
gi|1839536|gb|AAB47145.1|	dipeptidyl peptidase II, DPP II, dipeptidyl aminopeptidase II {N-terminal} [swine, seminal plasma, Peptide Partial, 41 aa] >gi|1881845|gb|AAB49532.1| dipeptidyl-peptidase II, DPP II {N-terminal} {EC 3.4.14.2} [swine, seminal plasma, Peptide Partial,|1839536|gb|AAB47145.1|	GO:0008239	GO:0016023	GO:0005764	GO:0004177	GO:0005576	GO:0008236	GO:0006508	GO:0005829
gi|47523628|ref|NP_999442.1|	aminopeptidase N [Sus scrofa] >gi|1703286|sp|P15145.3|AMPN_PIG RecName: Full=Aminopeptidase N; Short=AP-N; Short=pAPN; AltName: Full=Alanyl aminopeptidase; AltName: Full=Aminopeptidase M; Short=AP-M; AltName: Full=Microsomal aminopeptidase; AltName:|47523628|ref|NP_999442.1|	GO:0031983	GO:0005829	GO:0042277	GO:0001525	GO:0008270	GO:0009897	GO:0005793	GO:0035814	GO:0004872	GO:0004177	GO:0006508	GO:0008237	GO:0030154	GO:0012506	GO:0006725	GO:0019048	GO:0005887
gi|47115532|sp|Q9XT00.2|DHB8_PIG	RecName: Full=Estradiol 17-beta-dehydrogenase 8; AltName: Full=17-beta-hydroxysteroid dehydrogenase 8; Short=17-beta-HSD 8; AltName: Full=3-oxoacyl-[acyl-carrier-protein] reductase; AltName: Full=Protein Ke6; Short=Ke-6; AltName: Full=Testosterone 1|47115532|sp|Q9XT00.2|DHB8_PIG	GO:0006633	GO:0055114	GO:0006703	GO:0050327	GO:0002376	GO:0003857	GO:0005515	GO:0044425	GO:0004303	GO:0000166	GO:0005759	GO:0005740	GO:0008209	GO:0005886
[truncated: 22 more columns]

## Sheet: bin 1
Gene	GWEIGHT	114	115	116	117	118
EWEIGHT		1	1	1	1	1
gi|350593701|ref|XP_003483747.1| PREDICTED: hypothetical protein LOC100737189 [Sus scrofa]	1	0	-0.443786	0.937231	0.795104	0.553154
gi|311275253|ref|XP_003134650.1| PREDICTED: single-stranded DNA-binding protein, mitochondrial-like isoform 1 [Sus scrofa]	1	0	-0.571666	0.584963	0.947862	0.593841
gi|350588218|ref|XP_003129667.3| PREDICTED: nuclear mitotic apparatus protein 1-like [Sus scrofa]	1	0	-0.19162	0.433757	0.562458	0.60555
gi|335309939|ref|XP_003133770.2| PREDICTED: nucleolin-like [Sus scrofa]	1	0	-0.210334	0.891487	0.781926	0.619634
gi|311259030|ref|XP_003127902.1| PREDICTED: small nuclear ribonucleoprotein Sm D1-like [Sus scrofa]	1	0	-0.112841	0.957548	1.24959	0.629494
gi|169139278|gb|ACA48587.1| liver fatty acid binding protein [Sus scrofa]	1	0	-0.684207	1.05995	0.392803	0.65305
gi|339895863|ref|NP_001229960.1| coiled-coil and C2 domain-containing 1A [Sus scrofa]	1	0	-0.339985	0.938412	0.186892	0.655466
gi|350592614|ref|XP_003483500.1| PREDICTED: splicing factor 3A subunit 1 isoform 1 [Sus scrofa]	1	0	-0.353562	0.544936	0.37996	0.66862
gi|194034199|ref|XP_001928042.1| PREDICTED: proteasome subunit alpha type-3 isoform 2 [Sus scrofa]	1	0	-0.342746	0.576789	0.523511	0.670483
gi|343780950|ref|NP_001230488.1| 39S ribosomal protein L40, mitochondrial isoform 1 [Sus scrofa]	1	0	0.023673	0.702886	0.753315	0.694716
gi|122064583|sp|P04178.2|SODC_PIG RecName: Full=Superoxide dismutase [Cu-Zn] >gi|298677090|ref|NP_001177351.1| superoxide dismutase [Cu-Zn] [Sus scrofa] >gi|297593564|gb|ADI47520.1| superoxide dismutase 1 [Sus scrofa]	1	0	-0.026748	0.652378	0.970718	0.707177
gi|113196863|gb|ABI31729.1| low molecular mass protein 7 [Sus scrofa]	1	0	-0.120206	0.626404	0.57481	0.751461
gi|346986324|ref|NP_001231316.1| tumor protein D52 [Sus scrofa]	1	0	-0.386586	0.536477	0.191342	0.753167
gi|194037681|ref|XP_001926390.1| PREDICTED: early endosome antigen 1 [Sus scrofa]	1	0	-0.194011	0.393863	0.402563	0.769464
gi|311255476|ref|XP_003126249.1| PREDICTED: chromobox protein homolog 5-like isoform 2 [Sus scrofa] >gi|311255478|ref|XP_003126248.1| PREDICTED: chromobox protein homolog 5-like isoform 1 [Sus scrofa]	1	0	0.257946	1.07811	0.496992	0.805612
gi|222136592|ref|NP_001138374.1| proteasome subunit beta type-3 [Sus scrofa]	1	0	0.188297	0.973715	0.894976	0.805907
gi|356614808|gb|AET25525.1| mitochondrial NADH dehydrogenase Fe-S protein 4 [Sus scrofa]	1	0	-0.441889	0.237225	0.430684	0.807355
gi|350589637|ref|XP_003130870.3| PREDICTED: splicing factor 45 [Sus scrofa]	1	0	-0.599126	0.561135	0.39439	0.81575
gi|350593430|ref|XP_003483683.1| PREDICTED: glutathione reductase, mitochondrial isoform 1 [Sus scrofa]	1	0	-0.428974	0.854023	0.68949	0.815942
gi|113205586|ref|NP_001038000.1| 26S proteasome non-ATPase regulatory subunit 4 [Sus scrofa] >gi|55983054|gb|AAV69969.1| proteasome 26S subunit non-ATPase 4 [Sus scrofa]	1	0	-0.27975	0.535051	0.56649	0.834698
gi|178056175|ref|NP_001116558.1| basigin precursor [Sus scrofa] >gi|166244451|gb|ABY86570.1| CD147 [Sus scrofa]	1	0	-0.201864	0.656664	0.144171	0.83895
gi|194036975|ref|XP_001927782.1| PREDICTED: polyadenylate-binding protein 1 [Sus scrofa]	1	0	-0.261398	0.712857	0.571251	0.847269
gi|190360663|ref|NP_001121949.1| FYVE and coiled-coil domain-containing protein 1 [Sus scrofa] >gi|41688293|dbj|BAD08647.1| FYVE and coiled-coil domain containing 1 [Sus scrofa]	1	0	-0.129097	0.436254	0.681037	0.847337
gi|311270662|ref|XP_003132938.1| PREDICTED: phosphatidylethanolamine-binding protein 1-like [Sus scrofa]	1	0	-0.244237	0.539195	0.431833	0.852495
gi|311250341|ref|XP_003124106.1| PREDICTED: transcription initiation factor TFIID subunit 7 [Sus scrofa]	1	0	-0.454284	0.724537	0.583877	0.878313
gi|343887360|ref|NP_001230581.1| proteasome (prosome, macropain) subunit, alpha type [Sus scrofa]	1	0	-0.528403	0.584117	0.54642	0.882514
gi|350582222|ref|XP_003481226.1| PREDICTED: LOW QUALITY PROTEIN: dynactin subunit 1 [Sus scrofa]	1	0	-0.391871	0.787818	0.264464	0.894734
gi|350587962|ref|XP_003482523.1| PREDICTED: PDZ and LIM domain protein 5 isoform 1 [Sus scrofa]	1	0	-0.518954	0.60937	0.312894	0.901236
gi|350581286|ref|XP_003124146.3| PREDICTED: hypothetical protein LOC100516425 [Sus scrofa]	1	0	-0.650143	0.45762	0.439524	0.90705
gi|2833353|sp|Q29058.1|LEG4_PIG RecName: Full=Galectin-4; Short=Gal-4; AltName: Full=L-36 lactose-binding protein; Short=L36LBP; AltName: Full=Lactose-binding lectin 4 >gi|47522788|ref|NP_999146.1| galectin-4 [Sus scrofa] >gi|623346|emb|CAA55884.1| L-36 lactose binding protein [Su	1	0	-0.014658	0.598362	0.563868	0.912712
gi|311246780|ref|XP_003122339.1| PREDICTED: haloacid dehalogenase-like hydrolase domain-containing protein 2-like [Sus scrofa]	1	0	0.059935	0.333341	0.550705	0.920369
gi|194044822|ref|XP_001927404.1| PREDICTED: peroxiredoxin-4 [Sus scrofa]	1	0	-0.661818	0.333817	0.520164	0.930873
gi|350579447|ref|XP_003480607.1| PREDICTED: protein NipSnap homolog 3A [Sus scrofa]	1	0	-0.304855	0.379952	0.516321	0.934194
gi|255683394|ref|NP_001157474.1| ornithine carbamoyltransferase, mitochondrial [Sus scrofa]	1	0	0.04902	0.405867	0.865983	0.936285
gi|47523692|ref|NP_999478.1| thioredoxin [Sus scrofa] >gi|20141821|sp|P82460.3|THIO_PIG RecName: Full=Thioredoxin; Short=Trx >gi|332368598|gb|AEE61373.1| thioredoxin [Sus scrofa] >gi|14326453|gb|AAK60272.1|AF382821_1 thioredoxin [Sus scrofa]	1	0	-0.27184	0.529614	0.56565	0.945327
gi|164414678|emb|CAO81735.1| Alternative Pig Liver Esterase [Sus scrofa]	1	0	-0.377267	0.235571	0.796047	0.947174
gi|347543777|ref|NP_001231552.1| protein LYRIC [Sus scrofa]	1	0	-0.698846	0.886117	0.4432	0.959571
gi|346644699|ref|NP_001231019.1| protein SET [Sus scrofa]	1	0	-0.291579	0.703661	0.743164	0.960644
gi|350587882|ref|XP_003129304.3| PREDICTED: caspase-6-like [Sus scrofa]	1	0	-0.45143	0.768388	0.823373	0.96417
gi|298104082|ref|NP_001177109.1| dynein light chain roadblock-type 1 [Sus scrofa]	1	0	-0.263034	-0.156236	0.48465	1.00204
gi|61214649|sp|Q767K9.1|PP1RA_PIG RecName: Full=Serine/threonine-protein phosphatase 1 regulatory subunit 10; AltName: Full=MHC class I region proline-rich protein CAT53; AltName: Full=Protein FB19 >gi|178056844|ref|NP_001116637.1| serine/threonine-protein phosphatase 1 regulatory s	1	0	-0.532371	0.270666	0.286721	1.01866
gi|311248177|ref|XP_003123013.1| PREDICTED: proteasome subunit alpha type-1-like [Sus scrofa]	1	0	-0.696165	0.543709	0.429149	1.02546
gi|350579445|ref|XP_003480606.1| PREDICTED: protein NipSnap homolog 3A-like [Sus scrofa]	1	0	-0.209366	0.156622	0.724292	1.03805
gi|350529356|ref|NP_001231917.1| NADH dehydrogenase (ubiquinone) Fe-S protein 5, 15kDa (NADH-coenzyme Q reductase) [Sus scrofa]	1	0	-0.080716	0.443919	0.556393	1.04079
gi|148235064|ref|NP_001090909.1| myc box-dependent-interacting protein 1 [Sus scrofa] >gi|119352621|gb|ABL63907.1| bridging integrator 1 [Sus scrofa]	1	0	-0.25707	0.03542	0.764902	1.04877
gi|350588522|ref|XP_003482670.1| PREDICTED: ubiquitin carboxyl-terminal hydrolase 28-like [Sus scrofa]	1	0	-0.54642	0.322275	0.830726	1.05033
gi|298160941|ref|NP_001177148.1| pterin-4 alpha-carbinolamine dehydratase/dimerization cofactor of hepatocyte nuclear factor 1 alpha [Sus scrofa]	1	0	0.367341	0.761389	0.601806	1.05278
gi|350595655|ref|XP_003135120.3| PREDICTED: RNA-binding protein 10-like [Sus scrofa]	1	0	-0.431604	0.931192	0.694773	1.05962
gi|167908791|ref|NP_001108148.1| EPLIN-b [Sus scrofa] >gi|86450155|gb|ABC96266.1| EPLIN-b [Sus scrofa]	1	0	-0.531623	0.524905	0.081409	1.08658
gi|335299026|ref|XP_003132223.2| PREDICTED: microtubule-associated protein 4-like [Sus scrofa]	1	0	-0.285806	0.853485	0.65803	1.08765
gi|350579947|ref|XP_003122565.3| PREDICTED: U4/U6.U5 tri-snRNP-associated protein 1 [Sus scrofa]	1	0	-0.45038	1.06604	0.82415	1.09401
gi|311247522|ref|XP_003122684.1| PREDICTED: succinate dehydrogenase assembly factor 2, mitochondrial-like [Sus scrofa]	1	0	-0.512467	-0.216351	0.461391	1.10663
gi|148225750|ref|NP_001090973.1| heat shock protein 105 kDa [Sus scrofa] >gi|141521428|gb|ABO88027.1| heat shock 105kDa/110kDa protein 1 [Sus scrofa]	1	0	0.069745	0.595865	0.977617	1.11592
gi|297747302|ref|NP_001172115.1| aspartyl aminopeptidase [Sus scrofa]	1	0	-0.248355	0.298467	0.529403	1.11752
gi|194039474|ref|XP_001924848.1| PREDICTED: DNA replication licensing factor MCM3 [Sus scrofa]	1	0	-0.091554	0.16816	0.490088	1.126
gi|194035837|ref|XP_001928904.1| PREDICTED: peroxisomal biogenesis factor 19 isoform 1 [Sus scrofa]	1	0	-0.281846	0.68031	0.382347	1.13843
gi|194018702|ref|NP_001123419.1| tropomyosin beta chain [Sus scrofa] >gi|83778524|gb|ABC47143.1| beta-tropomyosin [Sus scrofa]	1	0	-0.669248	0.536968	0.697032	1.14813
gi|350596362|ref|XP_003361090.2| PREDICTED: CD2-associated protein-like [Sus scrofa]	1	0	-0.04216	1.00231	1.0314	1.1516
gi|5915886|sp|O46427.1|CATH_PIG RecName: Full=Pro-cathepsin H; Contains: RecName: Full=Cathepsin H mini chain; Contains: RecName: Full=Cathepsin H; Contains: RecName: Full=Cathepsin H heavy chain; Contains: RecName: Full=Cathepsin H light chain; Flags: Precursor >gi|47522632|ref|N	1	0	-0.398549	1.3836	1.04087	1.16068
gi|347446687|ref|NP_001231527.1| glucosidase 2 subunit beta precursor [Sus scrofa]	1	0	-0.510315	0.660554	0.38157	1.17764
gi|311251345|ref|XP_003124567.1| PREDICTED: rab GTPase-binding effector protein 2-like [Sus scrofa]	1	0	0.025488	0.620608	0.759791	1.19408
gi|297307133|ref|NP_001171997.1| protein canopy homolog 2 precursor [Sus scrofa]	1	0	0.275454	0.832671	0.480071	1.19602
gi|148234672|ref|NP_001090881.1| porphobilinogen deaminase [Sus scrofa] >gi|112980813|gb|ABI29188.1| hydroxymethylbilane synthase [Sus scrofa]	1	0	-0.037274	0.57435	0.514319	1.19771
gi|2500586|sp|Q29099.1|PTBP1_PIG RecName: Full=Polypyrimidine tract-binding protein 1; Short=PTB; AltName: Full=Heterogeneous nuclear ribonucleoprotein I; Short=hnRNP I >gi|47523538|ref|NP_999396.1| polypyrimidine tract-binding protein 1 [Sus scrofa] >gi|1122433|emb|CAA63597.1| pol	1	0	-0.803068	1.55229	0.532495	1.20653
gi|350536531|ref|NP_001233199.1| phosphatidylinositol-binding clathrin assembly protein [Sus scrofa] >gi|338784421|gb|AEI98873.1| phosphatidylinositol-binding clathrin assembly protein [Sus scrofa]	1	0	0.145079	0.380652	0.565898	1.20912
gi|6094365|sp|O02799.1|STAT2_PIG RecName: Full=Signal transducer and activator of transcription 2 >gi|47522708|ref|NP_999054.1| signal transducer and activator of transcription 2 [Sus scrofa] >gi|315273316|gb|ADU03225.1| signal transducer and activator of transcription 2 [Sus scrof	1	0	-0.040866	0.749447	0.604601	1.21293
gi|349732213|ref|NP_001231857.1| LSM3 homolog, U6 small nuclear RNA associated [Sus scrofa]	1	0	0.038135	0.553239	0.543074	1.21437
gi|350595475|ref|XP_003360255.2| PREDICTED: proteasome subunit alpha type-2-like [Sus scrofa]	1	0	0.034616	0.560991	0.731198	1.21953
gi|350592730|ref|XP_003483523.1| PREDICTED: heterogeneous nuclear ribonucleoprotein F [Sus scrofa] >gi|335301642|ref|XP_003359253.1| PREDICTED: heterogeneous nuclear ribonucleoprotein F [Sus scrofa] >gi|194042674|ref|XP_001929089.1| PREDICTED: heterogeneous nuclear ribonucleoprotei	1	0	0.282064	1.2015	0.515782	1.22369
gi|311259825|ref|XP_001924399.2| PREDICTED: leucine-rich repeat-containing protein 16A [Sus scrofa]	1	0	-0.542077	0.427421	-0.009149	1.23231
gi|38569721|gb|AAR24381.1| isopentyl-diphosphate delta isomerase [Sus scrofa]	1	0	-0.316516	0.758346	0.59267	1.26409
gi|194033860|ref|XP_001927901.1| PREDICTED: UV excision repair protein RAD23 homolog B [Sus scrofa]	1	0	-0.20407	0.582009	1.1182	1.26843
gi|329663948|ref|NP_001192334.1| ras GTPase-activating protein-binding protein 1 [Sus scrofa]	1	0	-0.114571	0.700335	0.751307	1.26903
gi|121118|sp|P20305.1|GELS_PIG RecName: Full=Gelsolin; AltName: Full=Actin-depolymerizing factor; Short=ADF; AltName: Full=Brevin; Flags: Precursor >gi|164472|gb|AAA31042.1| plasma gelsolin precursor, partial [Sus scrofa] >gi|758306|emb|CAA32077.1| gelsolin [Sus scrofa]	1	0	-0.076277	0.60996	0.537357	1.27302
gi|347300360|ref|NP_001231474.1| serine/arginine repetitive matrix protein 2 [Sus scrofa]	1	0	-0.55781	0.503837	-0.067051	1.27546
gi|148222268|ref|NP_001090952.1| tropomyosin alpha-1 chain [Sus scrofa] >gi|158931149|sp|P42639.2|TPM1_PIG RecName: Full=Tropomyosin alpha-1 chain; AltName: Full=Alpha-tropomyosin; AltName: Full=Tropomyosin-1 >gi|117661180|gb|ABK55659.1| TPM1 [Sus scrofa]	1	0	-0.776974	0.707366	0.699187	1.27837
gi|335292272|ref|XP_003356696.1| PREDICTED: fumarylacetoacetase-like [Sus scrofa]	1	0	0.007081	0.594983	0.474996	1.28563
gi|335281552|ref|XP_003122601.2| PREDICTED: EH domain-containing protein 1 [Sus scrofa]	1	0	0.457583	0.60347	0.578173	1.28904
gi|335290571|ref|XP_003356212.1| PREDICTED: UPF0485 protein C1orf144 homolog isoform 2 [Sus scrofa]	1	0	-1.69437	0.875574	1.01946	1.3018
gi|122064241|sp|Q06AT0.3|HPCL1_PIG RecName: Full=Hippocalcin-like protein 1 >gi|178056468|ref|NP_001116598.1| hippocalcin-like protein 1 [Sus scrofa] >gi|115394792|gb|ABI97190.1| HPCL1 [Sus scrofa]	1	0	0.207254	0.840111	0.813795	1.31044
gi|350580243|ref|XP_003123005.3| PREDICTED: harmonin-like [Sus scrofa]	1	0	0.150576	0.837856	0.440666	1.31872
gi|237681312|ref|NP_001153744.1| protein S100-A12 [Sus scrofa] >gi|126302600|sp|P80310.2|S10AC_PIG RecName: Full=Protein S100-A12; AltName: Full=Calgranulin-C; Short=CAGC; AltName: Full=Extracellular newly identified RAGE-binding protein; Short=EN-RAGE; AltName: Full=S100 calcium-b	1	0	0.134426	1.01263	0.019591	1.33092
gi|311273235|ref|XP_003133777.1| PREDICTED: intestinal-type alkaline phosphatase-like isoform 2 [Sus scrofa]	1	0	-0.299022	0.348823	0.847375	1.34772
gi|335307509|ref|XP_003360867.1| PREDICTED: lipoma-preferred partner-like, partial [Sus scrofa]	1	0	-0.300911	0.826262	0.527732	1.34995
gi|118403904|ref|NP_001072131.1| protein DJ-1 [Sus scrofa] >gi|67038668|gb|AAY63803.1| DJ-1 protein [Sus scrofa]	1	0	-0.035832	0.832415	0.518938	1.36014
gi|116551|sp|P04404.2|CMGA_PIG RecName: Full=Chromogranin-A; Short=CgA; Contains: RecName: Full=Pancreastatin; Contains: RecName: Full=Parastatin; Contains: RecName: Full=WE-14; Flags: Precursor >gi|164417|gb|AAA31016.1| chromogranin A precursor, partial [Sus scrofa]	1	0	-0.304538	1.17411	0.798871	1.36122
gi|350594565|ref|XP_003134235.3| PREDICTED: acid ceramidase-like [Sus scrofa]	1	0	0.339279	0.62213	0.769456	1.37436
gi|194036296|ref|XP_001926524.1| PREDICTED: splicing factor 3B subunit 4 [Sus scrofa]	1	0	0.003009	0.539062	0.143242	1.38729
gi|350582315|ref|XP_003481243.1| PREDICTED: NFU1 iron-sulfur cluster scaffold homolog, mitochondrial-like [Sus scrofa]	1	0	-0.398591	0.239877	0.44954	1.38837
gi|311253255|ref|XP_003125488.1| PREDICTED: alanine aminotransferase 1-like [Sus scrofa]	1	0	0.310811	-0.341088	1.16239	1.40326
gi|350589440|ref|XP_003130687.3| PREDICTED: Golgi membrane protein 1-like [Sus scrofa]	1	0	-0.886872	0.550162	0.827348	1.41504
gi|350590315|ref|XP_003483030.1| PREDICTED: eukaryotic translation initiation factor 1-like [Sus scrofa]	1	0	0.218996	0.68005	0.561687	1.42576
gi|350581244|ref|XP_003354387.2| PREDICTED: transcription elongation regulator 1-like [Sus scrofa]	1	0	-0.209112	0.378652	0.56358	1.42614
gi|311259005|ref|XP_003127890.1| PREDICTED: myosin regulatory light chain 12B isoform 2 [Sus scrofa] >gi|311259003|ref|XP_003127889.1| PREDICTED: myosin regulatory light chain 12B isoform 1 [Sus scrofa]	1	0	-0.478551	-0.108965	0.250975	1.45158
gi|350584145|ref|XP_001929467.3| PREDICTED: nascent polypeptide-associated complex subunit alpha isoform 1 [Sus scrofa]	1	0	-0.517618	1.29883	0.609424	1.46229
gi|297747368|ref|NP_001172101.1| ubiquinol-cytochrome c reductase binding protein [Sus scrofa]	1	0	-1.03025	0.282723	0.763105	1.50626
gi|335287361|ref|XP_001928581.3| PREDICTED: formin binding protein 1-like [Sus scrofa]	1	0	-0.310036	0.795677	0.814317	1.51566
gi|261490800|ref|NP_001159781.1| survival of motor neuron-related-splicing factor 30 [Sus scrofa] >gi|190333253|gb|ACE73645.1| survival motor neuron domain-containing protein 1 [Sus scrofa] >gi|190576653|gb|ACE73646.1| survival motor neuron domain-containing protein 1 [Sus scrofa]	1	0	-0.539492	1.22948	0.798188	1.51747
gi|113205682|ref|NP_001038022.1| protein S100-A6 [Sus scrofa] >gi|97190495|sp|Q2EN75.1|S10A6_PIG RecName: Full=Protein S100-A6; AltName: Full=Calcyclin; AltName: Full=S100 calcium-binding protein A6 >gi|87047648|gb|ABD18457.1| S100 calcium-binding protein A6 [Sus scrofa]	1	0	-0.005289	0.320608	0.185533	1.51833
gi|57528035|ref|NP_001009582.1| stathmin [Sus scrofa] >gi|75043336|sp|Q6DUB7.3|STMN1_PIG RecName: Full=Stathmin >gi|49615355|gb|AAT66936.1| stathmin-1 [Sus scrofa]	1	0	-0.183231	0.606278	0.855231	1.56505
gi|350586216|ref|XP_003128039.3| PREDICTED: thioredoxin domain-containing protein 12-like [Sus scrofa]	1	0	-0.321243	0.773258	0.879199	1.57257
gi|346644844|ref|NP_001231177.1| phosphotriesterase-related protein [Sus scrofa]	1	0	-0.573654	0.134165	1.07984	1.57825
gi|13399613|pdb|1HM6|A Chain A, X-Ray Structure Of Full-Length Annexin 1 >gi|28948618|pdb|1MCX|A Chain A, Structure Of Full-Length Annexin A1 In The Presence Of Calcium >gi|13399614|pdb|1HM6|B Chain B, X-Ray Structure Of Full-Length Annexin 1	1	0	-0.636493	0.061928	-0.10044	1.66297
gi|335296459|ref|XP_003130769.2| PREDICTED: vimentin-like [Sus scrofa]	1	0	-0.586973	0.618068	0.664445	1.66571
gi|350578316|ref|XP_003121377.3| PREDICTED: absent in melanoma 1 protein [Sus scrofa]	1	0	-0.439522	0.380604	0.78714	1.72574
gi|350580953|ref|XP_003354274.2| PREDICTED: 60S acidic ribosomal protein P1-like [Sus scrofa]	1	0	-0.181717	0.009903	0.72572	1.82976
gi|350585327|ref|XP_003356027.2| PREDICTED: peptidoglycan recognition protein 1-like [Sus scrofa]	1	0	0.166358	-0.082462	0.302563	1.94694
gi|311275253|ref|XP_003134650.1|	PREDICTED: single-stranded DNA-binding protein, mitochondrial-like isoform 1 [Sus scrofa]|311275253|ref|XP_003134650.1|	GO:0003723	GO:0006260	GO:0042645	GO:0070584	GO:0003697	GO:0051096	GO:0003682	GO:0005634
gi|350588218|ref|XP_003129667.3|	PREDICTED: nuclear mitotic apparatus protein 1-like [Sus scrofa]|350588218|ref|XP_003129667.3|	GO:0005829	GO:0005730	GO:0000086	GO:0000922	GO:0005876	GO:0000090	GO:0005515	GO:0006997	GO:0005654	GO:0005198
gi|335309939|ref|XP_003133770.2|	PREDICTED: nucleolin-like [Sus scrofa]|335309939|ref|XP_003133770.2|	GO:0005730	GO:0001525	GO:0005654	GO:0003723	GO:0005938	GO:0042162	GO:0030529	GO:0008022	GO:0000166
gi|311259030|ref|XP_003127902.1|	PREDICTED: small nuclear ribonucleoprotein Sm D1-like [Sus scrofa]|311259030|ref|XP_003127902.1|	GO:0030532	GO:0005829	GO:0003723	GO:0000245	GO:0007507	GO:0000387	GO:0005515	GO:0034660	GO:0071013	GO:0005654	GO:0005689
gi|169139278|gb|ACA48587.1|	liver fatty acid binding protein [Sus scrofa]|169139278|gb|ACA48587.1|	GO:0006810	GO:0005654	GO:0005324	GO:0008144	GO:0043066	GO:0070301	GO:0005543	GO:0050892	GO:0005829	GO:0008284	GO:0071456	GO:0043154	GO:0051345	GO:0045179	GO:0016209	GO:0032052	GO:0005504	GO:0032000	GO:0003682	GO:0005782
gi|339895863|ref|NP_001229960.1|	coiled-coil and C2 domain-containing 1A [Sus scrofa]|339895863|ref|NP_001229960.1|	GO:0005815	GO:0004871	GO:0005730	GO:0043123	GO:0001078	GO:0000978	GO:0005886
gi|350592614|ref|XP_003483500.1|	PREDICTED: splicing factor 3A subunit 1 isoform 1 [Sus scrofa]|350592614|ref|XP_003483500.1|	GO:0003723	GO:0005730	GO:0005684	GO:0005515	GO:0071013	GO:0005654	GO:0000389
gi|194034199|ref|XP_001928042.1|	PREDICTED: proteasome subunit alpha type-3 isoform 2 [Sus scrofa]|194034199|ref|XP_001928042.1|	GO:0000209	GO:0005654	GO:0005515	GO:0006521	GO:0051437	GO:0042981	GO:0010467	GO:0051436	GO:0004298	GO:0005829	GO:0002479	GO:0019773	GO:0019048	GO:0000084	GO:0000216	GO:0031145	GO:0016071	GO:0006977
gi|343780950|ref|NP_001230488.1|	39S ribosomal protein L40, mitochondrial isoform 1 [Sus scrofa]|343780950|ref|NP_001230488.1|	GO:0005634	GO:0005761	GO:0009653
gi|122064583|sp|P04178.2|SODC_PIG	RecName: Full=Superoxide dismutase [Cu-Zn] >gi|298677090|ref|NP_001177351.1| superoxide dismutase [Cu-Zn] [Sus scrofa] >gi|297593564|gb|ADI47520.1| superoxide dismutase 1 [Sus scrofa]|122064583|sp|P04178.2|SODC_PIG	GO:0031410	GO:0051087	GO:0008089	GO:0043524	GO:0008090	GO:0005777	GO:0005507	GO:0001541	GO:0042542	GO:0051770	GO:0002262	GO:0060088	GO:0043234	GO:0042554	GO:0005829	GO:0001895	GO:0051881	GO:0007605	GO:0040014	GO:0031667	GO:0006749	GO:0008217	GO:0005615	GO:0007283	GO:0060052	GO:0060087	GO:0032839	GO:0045471	GO:0007569	GO:0006309	GO:0006916	GO:0045541	GO:0050665	GO:0019430	GO:0001819	GO:0005886	GO:0004842	GO:0007626	GO:0009408	GO:0046688	GO:0008270	GO:0005739	GO:0055114	GO:0043161	GO:0006302	GO:0004784	GO:0044419	GO:0007566
gi|113196863|gb|ABI31729.1|	low molecular mass protein 7 [Sus scrofa]|113196863|gb|ABI31729.1|	GO:0000209	GO:0005654	GO:0060337	GO:0006521	GO:0051437	GO:0042981	GO:0010467	GO:0051436	GO:0004298	GO:0005839	GO:0005829	GO:0045444	GO:0002479	GO:0019048	GO:0000084	GO:0000216	GO:0031145	GO:0016071	GO:0006977
gi|346986324|ref|NP_001231316.1|	tumor protein D52 [Sus scrofa]|346986324|ref|NP_001231316.1|	GO:0046903	GO:0009653	GO:0005509	GO:0046982	GO:0005783	GO:0042803	GO:0048471	GO:0030183
gi|194037681|ref|XP_001926390.1|	PREDICTED: early endosome antigen 1 [Sus scrofa]|194037681|ref|XP_001926390.1|	GO:0005829	GO:0031901	GO:0005516	GO:0006906	GO:0008270	GO:0005545	GO:0016189	GO:0030742	GO:0045022	GO:0042803	GO:0005969	GO:0019897
gi|311255476|ref|XP_003126249.1|	PREDICTED: chromobox protein homolog 5-like isoform 2 [Sus scrofa] >gi|311255478|ref|XP_003126248.1| PREDICTED: chromobox protein homolog 5-like isoform 1 [Sus scrofa]|311255476|ref|XP_003126249.1|	GO:0035097	GO:0030674	GO:0017053	GO:0005730	GO:0035064	GO:0000118	GO:0000776	GO:0016605	GO:0070491	GO:0019048	GO:0010369	GO:0005635	GO:0045892	GO:0005737	GO:0042826	GO:0003682	GO:0007596	GO:0031618
gi|222136592|ref|NP_001138374.1|	proteasome subunit beta type-3 [Sus scrofa]|222136592|ref|NP_001138374.1|	GO:0000209	GO:0005654	GO:0006521	GO:0051437	GO:0042981	GO:0010467	GO:0051436	GO:0004298	GO:0005839	GO:0005829	GO:0002479	GO:0019048	GO:0000084	GO:0000216	GO:0031145	GO:0016071	GO:0006977
gi|356614808|gb|AET25525.1|	mitochondrial NADH dehydrogenase Fe-S protein 4 [Sus scrofa]|356614808|gb|AET25525.1|	GO:0048146	GO:0001932	GO:0008137	GO:0005747	GO:0007420	GO:0072593	GO:0006120	GO:0019933	GO:0032981	GO:0044281	GO:0051591
gi|350589637|ref|XP_003130870.3|	PREDICTED: splicing factor 45 [Sus scrofa]|350589637|ref|XP_003130870.3|	GO:0005730	GO:0005681	GO:0003723	GO:0005515	GO:0000375	GO:0006397	GO:0000166
gi|350593430|ref|XP_003483683.1|	PREDICTED: glutathione reductase, mitochondrial isoform 1 [Sus scrofa]|350593430|ref|XP_003483683.1|	GO:0005829	GO:0055114	GO:0005739	GO:0045454	GO:0009055	GO:0007283	GO:0006749	GO:0004362	GO:0050660	GO:0043295	GO:0050661	GO:0042803	GO:0015949
gi|113205586|ref|NP_001038000.1|	26S proteasome non-ATPase regulatory subunit 4 [Sus scrofa] >gi|55983054|gb|AAV69969.1| proteasome 26S subunit non-ATPase 4 [Sus scrofa]|113205586|ref|NP_001038000.1|	GO:0000209	GO:0005654	GO:0005515	GO:0006521	GO:0051437	GO:0042981	GO:0010467	GO:0016032	GO:0051436	GO:0005829	GO:0002479	GO:0000084	GO:0000502	GO:0000216	GO:0031145	GO:0016071	GO:0042044	GO:0006977
gi|178056175|ref|NP_001116558.1|	basigin precursor [Sus scrofa] >gi|166244451|gb|ABY86570.1| CD147 [Sus scrofa]|178056175|ref|NP_001116558.1|	GO:0046689	GO:0002080	GO:0042475	GO:0005739	GO:0007566	GO:0016021	GO:0000139	GO:0006090	GO:0005537	GO:0050900	GO:0043434	GO:0042470	GO:0007166	GO:0046697	GO:0005515	GO:0045121	GO:0042383	GO:0051591	GO:0007596
gi|194036975|ref|XP_001927782.1|	PREDICTED: polyadenylate-binding protein 1 [Sus scrofa]|194036975|ref|XP_001927782.1|	GO:0006413	GO:0005829	GO:0010494	GO:0000289	GO:0008494	GO:0006378	GO:0000398	GO:0008022	GO:0048255	GO:2000623	GO:0045727	GO:0008143	GO:0000166	GO:0071013
gi|190360663|ref|NP_001121949.1|	FYVE and coiled-coil domain-containing protein 1 [Sus scrofa] >gi|41688293|dbj|BAD08647.1| FYVE and coiled-coil domain containing 1 [Sus scrofa]|190360663|ref|NP_001121949.1|	GO:0072383	GO:0046872	GO:0005770	GO:0005764	GO:0005515	GO:0005776	GO:0016021
gi|311270662|ref|XP_003132938.1|	PREDICTED: phosphatidylethanolamine-binding protein 1-like [Sus scrofa]|311270662|ref|XP_003132938.1|	GO:0009611	GO:0051019	GO:0051602	GO:0005102	GO:0010243	GO:0051412	GO:0014823	GO:0045471	GO:0043679	GO:0042755	GO:0051592	GO:0007568	GO:0005615	GO:0004867	GO:0043950	GO:0005794	GO:0005741	GO:0009986	GO:0001933	GO:0007420	GO:0043025	GO:0014070	GO:0043409	GO:0007286	GO:0042493	GO:0051591	GO:0008021	GO:0009408	GO:0045177	GO:0008429	GO:0045840	GO:0009636	GO:0002026	GO:0060409	GO:0005791	GO:0005524	GO:0006979	GO:0010466
gi|311250341|ref|XP_003124106.1|	PREDICTED: transcription initiation factor TFIID subunit 7 [Sus scrofa]|311250341|ref|XP_003124106.1|	GO:0006367	GO:0006413	GO:0000122	GO:0042809	GO:0046966	GO:0000296	GO:0006469	GO:0003743	GO:0005794	GO:0005730	GO:0008024	GO:0044212	GO:0035035	GO:0003713	GO:0035067	GO:0005669	GO:0030520	GO:0003700	GO:0045944	GO:0033276	GO:0071339
gi|343887360|ref|NP_001230581.1|	proteasome (prosome, macropain) subunit, alpha type [Sus scrofa]|343887360|ref|NP_001230581.1|	GO:0000209	GO:0005654	GO:0006521	GO:0051437	GO:0042981	GO:0010467	GO:0051436	GO:0004298	GO:0005829	GO:0002479	GO:0019773	GO:0042802	GO:0019048	GO:0000084	GO:0000216	GO:0031145	GO:0016071	GO:0006977
gi|350582222|ref|XP_003481226.1|	PREDICTED: LOW QUALITY PROTEIN: dynactin subunit 1 [Sus scrofa]|350582222|ref|XP_003481226.1|	GO:0006810	GO:0005515	GO:0005829	GO:0005874	GO:0031252	GO:0019886	GO:0000776	GO:0007067	GO:0005813	GO:0006987	GO:0003774	GO:0008219	GO:0007399	GO:0005868	GO:0000086	GO:0000922
gi|350587962|ref|XP_003482523.1|	PREDICTED: PDZ and LIM domain protein 5 isoform 1 [Sus scrofa]|350587962|ref|XP_003482523.1|	GO:0005080	GO:0005829	GO:0030054	GO:0047485	GO:0030018	GO:0008270	GO:0061001	GO:0003779	GO:0042805	GO:0015629	GO:0045211	GO:0014069	GO:0051963	GO:0005886
gi|350581286|ref|XP_003124146.3|	PREDICTED: hypothetical protein LOC100516425 [Sus scrofa]|350581286|ref|XP_003124146.3|	GO:0005737	GO:0005730	GO:0001501	GO:0005515	GO:0005215
gi|2833353|sp|Q29058.1|LEG4_PIG	RecName: Full=Galectin-4; Short=Gal-4; AltName: Full=L-36 lactose-binding protein; Short=L36LBP; AltName: Full=Lactose-binding lectin 4 >gi|47522788|ref|NP_999146.1| galectin-4 [Sus scrofa] >gi|623346|emb|CAA55884.1| L-36 lactose binding protein [Su|2833353|sp|Q29058.1|LEG4_PIG	GO:0005829	GO:0007155	GO:0030246	GO:0005515	GO:0005886
gi|311246780|ref|XP_003122339.1|	PREDICTED: haloacid dehalogenase-like hydrolase domain-containing protein 2-like [Sus scrofa]|311246780|ref|XP_003122339.1|	GO:0016787	GO:0046872	GO:0008152
gi|194044822|ref|XP_001927404.1|	PREDICTED: peroxiredoxin-4 [Sus scrofa]|194044822|ref|XP_001927404.1|	GO:0005615	GO:0007252	GO:0005515	GO:0008379	GO:0072593	GO:0005739	GO:0055114
gi|350579447|ref|XP_003480607.1|	PREDICTED: protein NipSnap homolog 3A [Sus scrofa]|350579447|ref|XP_003480607.1|	GO:0005515	GO:0005829
gi|255683394|ref|NP_001157474.1|	ornithine carbamoyltransferase, mitochondrial [Sus scrofa]|255683394|ref|NP_001157474.1|	GO:0019240	GO:0070207	GO:0004585	GO:0055081	GO:0006526	GO:0005743	GO:0042301	GO:0001889	GO:0005543	GO:0070781	GO:0000050	GO:0006591	GO:0007494	GO:0032868	GO:0009348	GO:0005759	GO:0042493	GO:0016597	GO:0010043
gi|47523692|ref|NP_999478.1|	thioredoxin [Sus scrofa] >gi|20141821|sp|P82460.3|THIO_PIG RecName: Full=Thioredoxin; Short=Trx >gi|332368598|gb|AEE61373.1| thioredoxin [Sus scrofa] >gi|14326453|gb|AAK60272.1|AF382821_1 thioredoxin [Sus scrofa]|47523692|ref|NP_999478.1|	GO:0015035	GO:0005654	GO:0000122	GO:0033158	GO:0007267	GO:0005515	GO:0006928	GO:0008283	GO:0035872	GO:0009055	GO:0005576	GO:0005829	GO:0022900	GO:0045454	GO:0015949	GO:0006662	GO:0009314	GO:0015037	GO:0043388	GO:0045087	GO:0046826	GO:0005739
gi|164414678|emb|CAO81735.1|	Alternative Pig Liver Esterase [Sus scrofa]|164414678|emb|CAO81735.1|	GO:0016787
gi|347543777|ref|NP_001231552.1|	protein LYRIC [Sus scrofa]|347543777|ref|NP_001231552.1|	GO:0010508	GO:0000122	GO:0043066	GO:0031965	GO:0045766	GO:0031663	GO:0016021	GO:0005789	GO:0005730	GO:0043123	GO:0016604	GO:0003713	GO:0001085	GO:0051059	GO:0048471	GO:0005923	GO:0051092	GO:0046581	GO:0016324	GO:0051897
gi|346644699|ref|NP_001231019.1|	protein SET [Sus scrofa]|346644699|ref|NP_001231019.1|	GO:0005654	GO:0042393	GO:0006913	GO:0006337	GO:0045892	GO:0005829	GO:0043234	GO:0035067	GO:0003677	GO:0004864	GO:0008601	GO:0048471	GO:0043524	GO:0005783	GO:0006334	GO:0016071	GO:0006260
gi|350587882|ref|XP_003129304.3|	PREDICTED: caspase-6-like [Sus scrofa]|350587882|ref|XP_003129304.3|	GO:0010332	GO:0005829	GO:0009749	GO:0046670	GO:0043525	GO:0006917	GO:0033574	GO:0010243	GO:0006921	GO:0010039	GO:0009408	GO:0002525	GO:0006508	GO:0004197	GO:0005515	GO:0034097	GO:0032355	GO:0005654	GO:0002088	GO:0042542
gi|298104082|ref|NP_001177109.1|	dynein light chain roadblock-type 1 [Sus scrofa]|298104082|ref|NP_001177109.1|	GO:0042802	GO:0005813	GO:0007632	GO:0008090	GO:0005868	GO:0003777	GO:0005874
gi|61214649|sp|Q767K9.1|PP1RA_PIG	RecName: Full=Serine/threonine-protein phosphatase 1 regulatory subunit 10; AltName: Full=MHC class I region proline-rich protein CAT53; AltName: Full=Protein FB19 >gi|178056844|ref|NP_001116637.1| serine/threonine-protein phosphatase 1 regulatory s|61214649|sp|Q767K9.1|PP1RA_PIG	GO:0003676	GO:0008157	GO:0000790	GO:0046872	GO:0006606	GO:0004864	GO:0072357	GO:0043086
gi|311248177|ref|XP_003123013.1|	PREDICTED: proteasome subunit alpha type-1-like [Sus scrofa]|311248177|ref|XP_003123013.1|	GO:0000209	GO:0005654	GO:0005515	GO:0006521	GO:0051437	GO:0042981	GO:0010467	GO:0005844	GO:0016032	GO:0051436	GO:0004298	GO:0002862	GO:0005730	GO:0005829	GO:0002479	GO:0019773	GO:0001530	GO:0005813	GO:0000084	GO:0003723	GO:0000216	GO:0031145	GO:0016071	GO:0006977
gi|350579445|ref|XP_003480606.1|	PREDICTED: protein NipSnap homolog 3A-like [Sus scrofa]|350579445|ref|XP_003480606.1|	GO:0005515	GO:0005829
gi|350529356|ref|NP_001231917.1|	NADH dehydrogenase (ubiquinone) Fe-S protein 5, 15kDa (NADH-coenzyme Q reductase) [Sus scrofa]|350529356|ref|NP_001231917.1|	GO:0008137	GO:0005747	GO:0005758	GO:0006120	GO:0032981	GO:0044281
gi|148235064|ref|NP_001090909.1|	myc box-dependent-interacting protein 1 [Sus scrofa] >gi|119352621|gb|ABL63907.1| bridging integrator 1 [Sus scrofa]|148235064|ref|NP_001090909.1|	GO:0044300	GO:0007275	GO:0051020	GO:0043196	GO:0015629	GO:0043679	GO:0008283	GO:0046982	GO:0019048	GO:0008021	GO:0042692	GO:0045807	GO:0032403	GO:0043547	GO:0005634
gi|350588522|ref|XP_003482670.1|	PREDICTED: ubiquitin carboxyl-terminal hydrolase 28-like [Sus scrofa]|350588522|ref|XP_003482670.1|	GO:0006511	GO:0004221	GO:0006281	GO:0043234	GO:0010212	GO:0042771	GO:0005730	GO:0034644	GO:0004843	GO:0005515	GO:0000077	GO:0016579	GO:0005654	GO:0008283
gi|298160941|ref|NP_001177148.1|	pterin-4 alpha-carbinolamine dehydratase/dimerization cofactor of hepatocyte nuclear factor 1 alpha [Sus scrofa]|298160941|ref|NP_001177148.1|	GO:0051291	GO:0006559	GO:0051289	GO:0043496	GO:0005730	GO:0005829	GO:0004505	GO:0003713	GO:0042802	GO:0008124	GO:0006729	GO:0055114	GO:0045893
gi|350595655|ref|XP_003135120.3|	PREDICTED: RNA-binding protein 10-like [Sus scrofa]|350595655|ref|XP_003135120.3|	GO:0005730	GO:0016585	GO:0008380	GO:0003723	GO:0006397	GO:0008270	GO:0000166
gi|167908791|ref|NP_001108148.1|	EPLIN-b [Sus scrofa] >gi|86450155|gb|ABC96266.1| EPLIN-b [Sus scrofa]|167908791|ref|NP_001108148.1|	GO:0003785	GO:0008270	GO:0051017	GO:0051015	GO:0001725	GO:0030835	GO:0005925	GO:0005737	GO:0031529
gi|335299026|ref|XP_003132223.2|	PREDICTED: microtubule-associated protein 4-like [Sus scrofa]|335299026|ref|XP_003132223.2|	GO:0005875	GO:0005737	GO:0005198	GO:0005515	GO:0005886
gi|350579947|ref|XP_003122565.3|	PREDICTED: U4/U6.U5 tri-snRNP-associated protein 1 [Sus scrofa]|350579947|ref|XP_003122565.3|	GO:0007050	GO:0005829	GO:0015030	GO:0045585	GO:0005730	GO:0000387	GO:0005515	GO:0071013	GO:0005794
gi|311247522|ref|XP_003122684.1|	PREDICTED: succinate dehydrogenase assembly factor 2, mitochondrial-like [Sus scrofa]|311247522|ref|XP_003122684.1|	GO:0005730	GO:0018293	GO:0005515	GO:0006121	GO:0005739
gi|148225750|ref|NP_001090973.1|	heat shock protein 105 kDa [Sus scrofa] >gi|141521428|gb|ABO88027.1| heat shock 105kDa/110kDa protein 1 [Sus scrofa]|148225750|ref|NP_001090973.1|	GO:0045345	GO:0005730	GO:0051135	GO:0005874	GO:0051085	GO:0070507	GO:0005524	GO:0043014	GO:0043524	GO:0006986	GO:0005576	GO:0005737
gi|297747302|ref|NP_001172115.1|	aspartyl aminopeptidase [Sus scrofa]|297747302|ref|NP_001172115.1|	GO:0005737	GO:0006518	GO:0008237	GO:0006508	GO:0008270	GO:0004177	GO:0003725
gi|194039474|ref|XP_001924848.1|	PREDICTED: DNA replication licensing factor MCM3 [Sus scrofa]|194039474|ref|XP_001924848.1|	GO:0000084	GO:0000075	GO:0005730	GO:0000216	GO:0042555	GO:0005813	GO:0003677	GO:0005524	GO:0006271	GO:0005515	GO:0006270	GO:0004386	GO:0048471	GO:0000082	GO:0005658	GO:0005654
gi|194035837|ref|XP_001928904.1|	PREDICTED: peroxisomal biogenesis factor 19 isoform 1 [Sus scrofa]|194035837|ref|XP_001928904.1|	GO:0055085	GO:0005829	GO:0047485	GO:0072321	GO:0016021	GO:1900131	GO:0031526	GO:0005778	GO:0050821	GO:0036105	GO:0045046	GO:0061077	GO:0005634	GO:0016557
gi|194018702|ref|NP_001123419.1|	tropomyosin beta chain [Sus scrofa] >gi|83778524|gb|ABC47143.1| beta-tropomyosin [Sus scrofa]|194018702|ref|NP_001123419.1|	GO:0005829	GO:0008307	GO:0043462	GO:0030049	GO:0005862	GO:0003779	GO:0005200
gi|350596362|ref|XP_003361090.2|	PREDICTED: CD2-associated protein-like [Sus scrofa]|350596362|ref|XP_003361090.2|	GO:0001726	GO:0005730	GO:0006930	GO:0006461	GO:0031941	GO:0007165	GO:0005200	GO:0005737	GO:0005886	GO:0017124
gi|5915886|sp|O46427.1|CATH_PIG	RecName: Full=Pro-cathepsin H; Contains: RecName: Full=Cathepsin H mini chain; Contains: RecName: Full=Cathepsin H; Contains: RecName: Full=Cathepsin H heavy chain; Contains: RecName: Full=Cathepsin H light chain; Flags: Precursor >gi|47522632|ref|N|5915886|sp|O46427.1|CATH_PIG	GO:0004197	GO:0070371	GO:0010952	GO:0010815	GO:0043129	GO:0010628	GO:0019882	GO:0001656	GO:0031638	GO:0097208	GO:0004252	GO:0070324	GO:0043066	GO:0001913	GO:0045766	GO:0032526	GO:0005615	GO:0031648	GO:0005764	GO:0060448	GO:0005829	GO:0002764	GO:0016505	GO:0008284	GO:0010813	GO:0030108	GO:0010634	GO:0030984	GO:0004177	GO:0033619	GO:0097067
gi|347446687|ref|NP_001231527.1|	glucosidase 2 subunit beta precursor [Sus scrofa]|347446687|ref|NP_001231527.1|	GO:0005080	GO:0003723	GO:0051291	GO:0006491	GO:0005509	GO:0035091	GO:0005768	GO:0016310	GO:0016301	GO:0017177	GO:0007154	GO:0016787	GO:0005794	GO:0050830	GO:0005886
gi|311251345|ref|XP_003124567.1|	PREDICTED: rab GTPase-binding effector protein 2-like [Sus scrofa]|311251345|ref|XP_003124567.1|	GO:0006810	GO:0005768
gi|297307133|ref|NP_001171997.1|	protein canopy homolog 2 precursor [Sus scrofa]|297307133|ref|NP_001171997.1|	GO:0010988	GO:0005887	GO:0005515	GO:0045716	GO:0010629	GO:0005783
gi|148234672|ref|NP_001090881.1|	porphobilinogen deaminase [Sus scrofa] >gi|112980813|gb|ABI29188.1| hydroxymethylbilane synthase [Sus scrofa]|148234672|ref|NP_001090881.1|	GO:0051597	GO:0043176	GO:0071549	GO:0031100	GO:0006782	GO:0071284	GO:0031406	GO:0018160	GO:0005829	GO:0071236	GO:0010043	GO:0050662	GO:0014070	GO:0001666	GO:0033273	GO:0030424	GO:0000793	GO:0071418	GO:0042493	GO:0043200	GO:0071243	GO:0071345	GO:0004418	GO:0044281	GO:0004852	GO:0009743	GO:0005634	GO:0032025	GO:0032355	GO:0048708
gi|2500586|sp|Q29099.1|PTBP1_PIG	RecName: Full=Polypyrimidine tract-binding protein 1; Short=PTB; AltName: Full=Heterogeneous nuclear ribonucleoprotein I; Short=hnRNP I >gi|47523538|ref|NP_999396.1| polypyrimidine tract-binding protein 1 [Sus scrofa] >gi|1122433|emb|CAA63597.1| pol|2500586|sp|Q29099.1|PTBP1_PIG	GO:0008187	GO:0004519	GO:0005730	GO:0036002	GO:0000381	GO:0005515	GO:0048025	GO:0000166	GO:0003697	GO:0051148	GO:0005654
gi|350536531|ref|NP_001233199.1|	phosphatidylinositol-binding clathrin assembly protein [Sus scrofa] >gi|338784421|gb|AEI98873.1| phosphatidylinositol-binding clathrin assembly protein [Sus scrofa]|350536531|ref|NP_001233199.1|	GO:0030097	GO:0030122	GO:0048268	GO:0051223	GO:0032050	GO:0007409	GO:0042734	GO:0048813	GO:0016197	GO:0005794	GO:0045211	GO:0031623	GO:0005545	GO:0042802	GO:0048261	GO:0014069	GO:0005768	GO:0008021	GO:0048471	GO:0045893	GO:0017124	GO:0005634
gi|6094365|sp|O02799.1|STAT2_PIG	RecName: Full=Signal transducer and activator of transcription 2 >gi|47522708|ref|NP_999054.1| signal transducer and activator of transcription 2 [Sus scrofa] >gi|315273316|gb|ADU03225.1| signal transducer and activator of transcription 2 [Sus scrof|6094365|sp|O02799.1|STAT2_PIG	GO:0009615	GO:0005829	GO:0006357	GO:0005509	GO:0004871	GO:0007259	GO:0003677	GO:0005515	GO:0003700	GO:0060338	GO:0019048	GO:0005654	GO:0005886
gi|349732213|ref|NP_001231857.1|	LSM3 homolog, U6 small nuclear RNA associated [Sus scrofa]|349732213|ref|NP_001231857.1|	GO:0043928	GO:0046540	GO:0000398	GO:0005515	GO:0005829	GO:0071013	GO:0030629
gi|350595475|ref|XP_003360255.2|	PREDICTED: proteasome subunit alpha type-2-like [Sus scrofa]|350595475|ref|XP_003360255.2|	GO:0000209	GO:0009615	GO:0005654	GO:0005515	GO:0006521	GO:0051437	GO:0042981	GO:0010467	GO:0016032	GO:0051436	GO:0004298	GO:0005829	GO:0002479	GO:0019773	GO:0000084	GO:0000216	GO:0031145	GO:0016071	GO:0006977
gi|350592730|ref|XP_003483523.1|	PREDICTED: heterogeneous nuclear ribonucleoprotein F [Sus scrofa] >gi|335301642|ref|XP_003359253.1| PREDICTED: heterogeneous nuclear ribonucleoprotein F [Sus scrofa] >gi|194042674|ref|XP_001929089.1| PREDICTED: heterogeneous nuclear ribonucleoprotei|350592730|ref|XP_003483523.1|	GO:0043484	GO:0017025	GO:0003727	GO:0005730	GO:0000398	GO:0000166	GO:0071013	GO:0005654	GO:0005737
gi|311259825|ref|XP_001924399.2|	PREDICTED: leucine-rich repeat-containing protein 16A [Sus scrofa]|311259825|ref|XP_001924399.2|	GO:0007015	GO:0030027	GO:0016477	GO:0031529	GO:0007596	GO:0005634	GO:0005829	GO:0030032	GO:0046415
gi|38569721|gb|AAR24381.1|	isopentyl-diphosphate delta isomerase [Sus scrofa]|38569721|gb|AAR24381.1|	GO:0016787	GO:0008299	GO:0004452
gi|194033860|ref|XP_001927901.1|	PREDICTED: UV excision repair protein RAD23 homolog B [Sus scrofa]|194033860|ref|XP_001927901.1|	GO:0000718	GO:0031593	GO:0005730	GO:0007283	GO:0003697	GO:0005654	GO:0005737	GO:0032434	GO:0071942	GO:0000715
gi|329663948|ref|NP_001192334.1|	ras GTPase-activating protein-binding protein 1 [Sus scrofa]|329663948|ref|NP_001192334.1|	GO:0007265	GO:0004004	GO:0003676	GO:0004003	GO:0005515	GO:0000166	GO:0005737
gi|121118|sp|P20305.1|GELS_PIG	RecName: Full=Gelsolin; AltName: Full=Actin-depolymerizing factor; Short=ADF; AltName: Full=Brevin; Flags: Precursor >gi|164472|gb|AAA31042.1| plasma gelsolin precursor, partial [Sus scrofa] >gi|758306|emb|CAA32077.1| gelsolin [Sus scrofa]|121118|sp|P20305.1|GELS_PIG	GO:0051593	GO:0030027	GO:0006921	GO:0014003	GO:0060271	GO:0042246	GO:0045471	GO:0015629	GO:0007568	GO:0005615	GO:0030155	GO:0005509	GO:0071276	GO:0051014	GO:0005829	GO:0003779	GO:0016192	GO:0001726	GO:0048015	GO:0043234	GO:0048471	GO:0051016
gi|347300360|ref|NP_001231474.1|	serine/arginine repetitive matrix protein 2 [Sus scrofa]|347300360|ref|NP_001231474.1|	GO:0005730	GO:0015030	GO:0000398	GO:0016607	GO:0047485	GO:0070742	GO:0071013
gi|148222268|ref|NP_001090952.1|	tropomyosin alpha-1 chain [Sus scrofa] >gi|158931149|sp|P42639.2|TPM1_PIG RecName: Full=Tropomyosin alpha-1 chain; AltName: Full=Alpha-tropomyosin; AltName: Full=Tropomyosin-1 >gi|117661180|gb|ABK55659.1| TPM1 [Sus scrofa]|148222268|ref|NP_001090952.1|	GO:0042803	GO:0032059	GO:0034614	GO:0001701	GO:0047485	GO:0032781	GO:0060048	GO:0030336	GO:0005862	GO:0005829	GO:0005200	GO:0045785	GO:0051693	GO:0006937	GO:0030049	GO:0045214	GO:0031529	GO:0042060	GO:0051496	GO:0003065	GO:0055010	GO:0031941	GO:0001725	GO:0051015	GO:0008307	GO:0032587
gi|335292272|ref|XP_003356696.1|	PREDICTED: fumarylacetoacetase-like [Sus scrofa]|335292272|ref|XP_003356696.1|	GO:0004334	GO:0046872	GO:0006572	GO:0006527	GO:0034641	GO:0005829	GO:0006559
gi|335281552|ref|XP_003122601.2|	PREDICTED: EH domain-containing protein 1 [Sus scrofa]|335281552|ref|XP_003122601.2|	GO:0010886	GO:0055038	GO:0005515	GO:0032456	GO:0034383	GO:0005525	GO:0031095	GO:0005509	GO:0006184	GO:0006886	GO:0030139	GO:0007596	GO:0006897	GO:0048471	GO:0051260	GO:0005811	GO:0003924	GO:0005886	GO:0031901	GO:0005524	GO:0042632
gi|122064241|sp|Q06AT0.3|HPCL1_PIG	RecName: Full=Hippocalcin-like protein 1 >gi|178056468|ref|NP_001116598.1| hippocalcin-like protein 1 [Sus scrofa] >gi|115394792|gb|ABI97190.1| HPCL1 [Sus scrofa]|122064241|sp|Q06AT0.3|HPCL1_PIG	GO:0003779	GO:0005509	GO:0048839
gi|350580243|ref|XP_003123005.3|	PREDICTED: harmonin-like [Sus scrofa]|350580243|ref|XP_003123005.3|	GO:0030046	GO:0032420	GO:0000086	GO:0001750	GO:0045202	GO:0042472	GO:0050957	GO:0045494	GO:0042491	GO:0005515	GO:0001917	GO:0007605	GO:0005737	GO:0045177	GO:0005886
gi|237681312|ref|NP_001153744.1|	protein S100-A12 [Sus scrofa] >gi|126302600|sp|P80310.2|S10AC_PIG RecName: Full=Protein S100-A12; AltName: Full=Calgranulin-C; Short=CAGC; AltName: Full=Extracellular newly identified RAGE-binding protein; Short=EN-RAGE; AltName: Full=S100 calcium-b|237681312|ref|NP_001153744.1|	GO:0050786	GO:0008144	GO:0005829	GO:0008270	GO:0043303	GO:0006954	GO:0005509	GO:0031640	GO:0042742	GO:0006805	GO:0045087	GO:0043123	GO:0005576	GO:0050832	GO:0005634
gi|311273235|ref|XP_003133777.1|	PREDICTED: intestinal-type alkaline phosphatase-like isoform 2 [Sus scrofa]|311273235|ref|XP_003133777.1|	GO:0031225	GO:0046872	GO:0016021	GO:0004035	GO:0016310	GO:0005886
gi|335307509|ref|XP_003360867.1|	PREDICTED: lipoma-preferred partner-like, partial [Sus scrofa]|335307509|ref|XP_003360867.1|	GO:0005737	GO:0005515	GO:0005925	GO:0007155	GO:0005634	GO:0008270
gi|118403904|ref|NP_001072131.1|	protein DJ-1 [Sus scrofa] >gi|67038668|gb|AAY63803.1| DJ-1 protein [Sus scrofa]|118403904|ref|NP_001072131.1|	GO:0007338	GO:0051920	GO:2000277	GO:0032091	GO:0060081	GO:0051583	GO:0070301	GO:0060765	GO:0042743	GO:0050821	GO:0005829	GO:0004601	GO:0051899	GO:0030424	GO:0042493	GO:0006914	GO:0007005	GO:2001237	GO:0006508	GO:0008233	GO:0042803	GO:0043524	GO:0050727	GO:0005634	GO:0003729	GO:0005739	GO:0008344
gi|116551|sp|P04404.2|CMGA_PIG	RecName: Full=Chromogranin-A; Short=CgA; Contains: RecName: Full=Pancreastatin; Contains: RecName: Full=Parastatin; Contains: RecName: Full=WE-14; Flags: Precursor >gi|164417|gb|AAA31016.1| chromogranin A precursor, partial [Sus scrofa]|116551|sp|P04404.2|CMGA_PIG	GO:0030155	GO:0030141	GO:0050829	GO:0016525	GO:0046676	GO:0008217	GO:0030658	GO:0005576	GO:0050832	GO:0050830
gi|350594565|ref|XP_003134235.3|	PREDICTED: acid ceramidase-like [Sus scrofa]|350594565|ref|XP_003134235.3|	GO:0006687	GO:0006644	GO:0010033	GO:0044281	GO:0043202	GO:0030324	GO:0006672	GO:0017040
gi|194036296|ref|XP_001926524.1|	PREDICTED: splicing factor 3B subunit 4 [Sus scrofa]|194036296|ref|XP_001926524.1|	GO:0005654	GO:0003723	GO:0000398	GO:0005515	GO:0005689	GO:0000166
gi|350582315|ref|XP_003481243.1|	PREDICTED: NFU1 iron-sulfur cluster scaffold homolog, mitochondrial-like [Sus scrofa]|350582315|ref|XP_003481243.1|	GO:0016226	GO:0005506	GO:0005515	GO:0005813	GO:0051539	GO:0005634	GO:0005829	GO:0005739
gi|311253255|ref|XP_003125488.1|	PREDICTED: alanine aminotransferase 1-like [Sus scrofa]|311253255|ref|XP_003125488.1|	GO:0005829	GO:0008963	GO:0016021	GO:0003976	GO:0042853	GO:0006047	GO:0008652	GO:0004021	GO:0019408	GO:0006094	GO:0003975	GO:0006488	GO:0030170	GO:0005789	GO:0016757	GO:0006487
gi|350589440|ref|XP_003130687.3|	PREDICTED: Golgi membrane protein 1-like [Sus scrofa]|350589440|ref|XP_003130687.3|	GO:0005887	GO:0005794	GO:0005515
gi|350590315|ref|XP_003483030.1|	PREDICTED: eukaryotic translation initiation factor 1-like [Sus scrofa]|350590315|ref|XP_003483030.1|	GO:0005737	GO:0006950	GO:0006446	GO:0009048	GO:0003743
gi|350581244|ref|XP_003354387.2|	PREDICTED: transcription elongation regulator 1-like [Sus scrofa]|350581244|ref|XP_003354387.2|	GO:0001106	GO:0000122	GO:0001103	GO:0003713	GO:0005634
gi|311259005|ref|XP_003127890.1|	PREDICTED: myosin regulatory light chain 12B isoform 2 [Sus scrofa] >gi|311259003|ref|XP_003127889.1| PREDICTED: myosin regulatory light chain 12B isoform 1 [Sus scrofa]|311259005|ref|XP_003127890.1|	GO:0007411	GO:0005829	GO:0030018	GO:0008360	GO:0005509	GO:0072661	GO:0001725	GO:0035254	GO:0016460	GO:0045177	GO:0006936
gi|350584145|ref|XP_001929467.3|	PREDICTED: nascent polypeptide-associated complex subunit alpha isoform 1 [Sus scrofa]|350584145|ref|XP_001929467.3|	GO:0006412	GO:0017025	GO:0006355	GO:0030239	GO:0003677	GO:0005854	GO:0019048	GO:0003713	GO:0015031	GO:0005634
gi|297747368|ref|NP_001172101.1|	ubiquinol-cytochrome c reductase binding protein [Sus scrofa]|297747368|ref|NP_001172101.1|	GO:0051291	GO:0008121	GO:0005750	GO:0032403	GO:0006122	GO:0009060	GO:0044281
gi|335287361|ref|XP_001928581.3|	PREDICTED: formin binding protein 1-like [Sus scrofa]|335287361|ref|XP_001928581.3|	GO:0097320	GO:0030050	GO:0010324	GO:0005856	GO:0008289	GO:0072583	GO:0006900	GO:0016023	GO:0007399	GO:0005938	GO:0030154	GO:0005515	GO:0051491	GO:0006914	GO:0005886
gi|261490800|ref|NP_001159781.1|	survival of motor neuron-related-splicing factor 30 [Sus scrofa] >gi|190333253|gb|ACE73645.1| survival motor neuron domain-containing protein 1 [Sus scrofa] >gi|190576653|gb|ACE73646.1| survival motor neuron domain-containing protein 1 [Sus scrofa]|261490800|ref|NP_001159781.1|	GO:0003723	GO:0015030	GO:0006917	GO:0005681	GO:0000375	GO:0016607	GO:0005515	GO:0006397	GO:0005737
gi|113205682|ref|NP_001038022.1|	protein S100-A6 [Sus scrofa] >gi|97190495|sp|Q2EN75.1|S10A6_PIG RecName: Full=Protein S100-A6; AltName: Full=Calcyclin; AltName: Full=S100 calcium-binding protein A6 >gi|87047648|gb|ABD18457.1| S100 calcium-binding protein A6 [Sus scrofa]|113205682|ref|NP_001038022.1|	GO:0005829	GO:0047485	GO:0048146	GO:0001726	GO:0031234	GO:0008270	GO:0007049	GO:0005509	GO:0044548	GO:0051781	GO:0007409	GO:0048306	GO:0007165	GO:0048471	GO:0042803	GO:0005635	GO:0034220	GO:0015075	GO:0005523
gi|57528035|ref|NP_001009582.1|	stathmin [Sus scrofa] >gi|75043336|sp|Q6DUB7.3|STMN1_PIG RecName: Full=Stathmin >gi|49615355|gb|AAT66936.1| stathmin-1 [Sus scrofa]|57528035|ref|NP_001009582.1|	GO:0009615	GO:0031115	GO:0007019	GO:0005829	GO:0035556	GO:0004871	GO:0005874	GO:0007420	GO:0007052	GO:0051272	GO:0007409	GO:0015631	GO:0016020
gi|350586216|ref|XP_003128039.3|	PREDICTED: thioredoxin domain-containing protein 12-like [Sus scrofa]|350586216|ref|XP_003128039.3|	GO:0005788	GO:0045454	GO:0019153	GO:0055114
gi|346644844|ref|NP_001231177.1|	phosphotriesterase-related protein [Sus scrofa]|346644844|ref|NP_001231177.1|	GO:0008270	GO:0016788	GO:0009056
gi|13399613|pdb|1HM6|A	Chain A, X-Ray Structure Of Full-Length Annexin 1 >gi|28948618|pdb|1MCX|A Chain A, Structure Of Full-Length Annexin A1 In The Presence Of Calcium >gi|13399614|pdb|1HM6|B Chain B, X-Ray Structure Of Full-Length Annexin 1|13399613|pdb|1HM6|A	GO:0043065	GO:0031340	GO:0042803	GO:0070555	GO:0010165	GO:0043434	GO:0003697	GO:0097350	GO:0005198	GO:0043234	GO:0031394	GO:0005102	GO:0060206	GO:0014070	GO:0016323	GO:0018149	GO:0005615	GO:0005544	GO:0030073	GO:0031966	GO:0006916	GO:0070301	GO:0050482	GO:0042127	GO:0003727	GO:0042383	GO:0031018	GO:0030216	GO:0002674	GO:0071385	GO:0007166	GO:0050709	GO:0005929	GO:0007049	GO:0070365	GO:0006928	GO:0046632	GO:0030674	GO:0005509	GO:0032355	GO:0042493	GO:0001533	GO:0005634	GO:0042063	GO:0019834
gi|335296459|ref|XP_003130769.2|	PREDICTED: vimentin-like [Sus scrofa]|335296459|ref|XP_003130769.2|	GO:0005829	GO:0060020	GO:0070307	GO:0014002	GO:0030424	GO:0005777	GO:0045109	GO:0006921	GO:0008022	GO:0030049	GO:0042802	GO:0031252	GO:0005212	GO:0019901	GO:0005200	GO:0019048	GO:0010977	GO:0001701	GO:0005882	GO:0005886
gi|350578316|ref|XP_003121377.3|	PREDICTED: absent in melanoma 1 protein [Sus scrofa]|350578316|ref|XP_003121377.3|	GO:0002903	GO:0030246	GO:0034501	GO:0000122	GO:0033162	GO:0005515	GO:0042438	GO:0000236	GO:0016570	GO:0051983	GO:0004712	GO:0008608	GO:0016021	GO:0071777	GO:0005829	GO:0046777	GO:0046872	GO:0005819	GO:0004674	GO:0007601	GO:0034644	GO:0030496	GO:0031145	GO:0032133	GO:0005524	GO:0051256	GO:0000780	GO:0048066
gi|350580953|ref|XP_003354274.2|	PREDICTED: 60S acidic ribosomal protein P1-like [Sus scrofa]|350580953|ref|XP_003354274.2|	GO:0005840	GO:0006412
gi|350585327|ref|XP_003356027.2|	PREDICTED: peptidoglycan recognition protein 1-like [Sus scrofa]|350585327|ref|XP_003356027.2|	GO:0032827	GO:0008270	GO:0008745	GO:0031640	GO:0044117	GO:0045087	GO:0009253	GO:0042834	GO:0005576	GO:0032689	GO:0050832	GO:0016045	GO:0050830	GO:0016019
[truncated: 12 more columns]

## Sheet: bin 2
Gene	GWEIGHT	114	115	116	117	118
EWEIGHT		1	1	1	1	1
gi|47523822|ref|NP_999549.1| glutamate carboxypeptidase 2 [Sus scrofa] >gi|20138100|sp|O77564.1|FOLH1_PIG RecName: Full=Glutamate carboxypeptidase 2; AltName: Full=Folate hydrolase 1; AltName: Full=Folylpoly-gamma-glutamate carboxypeptidase; Short=FGCP; AltName: Full=Glutamate	1	0	-0.216273	1.34354	1.58189	0.992314
gi|311252444|ref|XP_003125100.1| PREDICTED: small nuclear ribonucleoprotein G-like [Sus scrofa]	1	0	0.726522	0.847121	1.3779	1.03735
gi|342187294|ref|NP_001230119.1| syndecan-1 precursor [Sus scrofa]	1	0	0.264751	2.15519	1.34402	1.08212
gi|350580865|ref|XP_003123779.3| PREDICTED: tubulin-specific chaperone A-like [Sus scrofa]	1	0	0.717141	0.331177	1.22094	1.0984
gi|311263676|ref|XP_003129789.1| PREDICTED: dipeptidyl peptidase 1-like [Sus scrofa]	1	0	-0.030162	1.02954	1.12387	1.16882
gi|343962595|ref|NP_001230634.1| thioredoxin, mitochondrial [Sus scrofa]	1	0	0.666484	1.22503	1.06323	1.20914
gi|47522844|ref|NP_999174.1| complement C3 precursor [Sus scrofa] >gi|11869931|gb|AAG40565.1|AF154933_1 complement component C3 [Sus scrofa] >gi|27801787|emb|CAD38823.2| complement C3 precursor [Sus scrofa]	1	0	0.439667	1.30153	1.22512	1.24863
gi|335310367|ref|XP_003361999.1| PREDICTED: heterogeneous nuclear ribonucleoprotein H2-like [Sus scrofa]	1	0	0.315929	1.23049	0.513375	1.30749
gi|343780936|ref|NP_001230484.1| heterogeneous nuclear ribonucleoprotein H3 [Sus scrofa]	1	0	0.368344	1.31024	0.550869	1.36834
gi|305855176|ref|NP_001182260.1| cleavage and polyadenylation specificity factor subunit 6 [Sus scrofa] >gi|285818464|gb|ADC38905.1| cleavage and polyadenylation specific factor 6 [Sus scrofa]	1	0	0.78136	0.480432	0.788955	1.38621
gi|350580651|ref|XP_003480867.1| PREDICTED: scaffold attachment factor B1-like isoform 2 [Sus scrofa]	1	0	-0.425833	1.35239	1.28514	1.38805
gi|194036227|ref|XP_001929678.1| PREDICTED: selenium-binding protein 1 [Sus scrofa]	1	0	-0.083283	0.959677	1.02284	1.39325
gi|335309827|ref|XP_003361787.1| PREDICTED: nuclear autoantigenic sperm protein, partial [Sus scrofa]	1	0	-0.183481	1.12756	1.07138	1.40893
gi|350592457|ref|XP_001929016.4| PREDICTED: CAP-Gly domain-containing linker protein 1 [Sus scrofa]	1	0	0.302143	0.619591	0.969516	1.43939
gi|346986249|ref|NP_001231282.1| proteasome subunit beta type-1 [Sus scrofa]	1	0	0.411881	0.592509	0.980319	1.44514
gi|350586921|ref|XP_003482304.1| PREDICTED: LOW QUALITY PROTEIN: apoptotic chromatin condensation inducer in the nucleus-like [Sus scrofa]	1	0	0.065567	0.75723	0.958305	1.45418
gi|350588987|ref|XP_003130351.3| PREDICTED: protein PRRC2C [Sus scrofa]	1	0	-0.48089	1.39178	1.09413	1.45943
gi|335310692|ref|XP_003362151.1| PREDICTED: protein LZIC-like [Sus scrofa]	1	0	0.141802	0.829136	0.88587	1.47125
gi|113205878|ref|NP_001038072.1| delta(3,5)-Delta(2,4)-dienoyl-CoA isomerase, mitochondrial [Sus scrofa] >gi|90024980|gb|AAZ82038.2| peroxisomal enoyl coenzyme A hydratase 1 [Sus scrofa]	1	0	-0.796013	1.57343	1.10845	1.48692
gi|62529273|gb|AAX84942.1| type III calpastatin [Sus scrofa]	1	0	0.205405	0.768229	0.7331	1.50859
gi|350583407|ref|XP_003481511.1| PREDICTED: cathepsin S [Sus scrofa]	1	0	-0.392455	0.981155	1.27946	1.525
gi|311247993|ref|XP_003122918.1| PREDICTED: probable methylthioribulose-1-phosphate dehydratase-like [Sus scrofa]	1	0	-0.011106	1.01814	1.03552	1.54192
gi|346421423|ref|NP_001231086.1| peptidyl-prolyl cis-trans isomerase FKBP3 [Sus scrofa]	1	0	0.810824	1.00607	1.09886	1.56524
gi|312062797|ref|NP_001185848.1| proactivator polypeptide precursor [Sus scrofa] >gi|310789269|gb|ADP24688.1| prosaposin variant 2 [Sus scrofa]	1	0	-0.031139	0.760391	0.918142	1.56601
gi|335287837|ref|XP_001926233.3| PREDICTED: prefoldin subunit 5-like isoform 1 [Sus scrofa]	1	0	-0.222392	0.904673	0.945808	1.57216
gi|114689|sp|P13618.1|ATP5J_PIG RecName: Full=ATP synthase-coupling factor 6, mitochondrial; Short=ATPase subunit F6	1	0	0.438843	0.732917	0.706839	1.57736
gi|155369760|ref|NP_001094498.1| peroxisomal acyl-coenzyme A oxidase 1 [Sus scrofa] >gi|112292673|gb|ABI14815.1| palmitoyl acyl-CoA oxidase 1 [Sus scrofa]	1	0	0.253803	0.902331	1.1839	1.59269
gi|162952052|ref|NP_001106151.1| transketolase [Sus scrofa] >gi|159502444|gb|ABW97521.1| transketolase [Sus scrofa]	1	0	0.456883	0.702593	0.818318	1.59774
gi|194044484|ref|XP_001929185.1| PREDICTED: eukaryotic translation initiation factor 2 subunit 2 [Sus scrofa]	1	0	0.070298	1.61913	1.21054	1.60215
gi|311248940|ref|XP_003123387.1| PREDICTED: growth arrest and DNA damage-inducible proteins-interacting protein 1-like [Sus scrofa]	1	0	0.127087	1.21198	1.28279	1.63461
gi|194034889|ref|XP_001929437.1| PREDICTED: zinc finger FYVE domain-containing protein 19 [Sus scrofa]	1	0	-0.077306	0.994455	1.04397	1.63619
gi|335289428|ref|XP_003127055.2| PREDICTED: hypothetical protein LOC100523791 [Sus scrofa]	1	0	0.539875	1.36072	1.26963	1.65006
gi|335307979|ref|XP_003361054.1| PREDICTED: abhydrolase domain-containing protein 10, mitochondrial-like [Sus scrofa]	1	0	0.655647	1.44904	1.2123	1.65038
gi|346986241|ref|NP_001231394.1| neurocalcin delta [Sus scrofa] >gi|346986243|ref|NP_001231395.1| neurocalcin delta [Sus scrofa]	1	0	0.577193	0.868365	1.25961	1.65828
gi|298104078|ref|NP_001177106.1| bcl-2-associated transcription factor 1 [Sus scrofa]	1	0	0.178667	0.31259	1.00152	1.67927
gi|343488538|ref|NP_001230424.1| cytoplasmic dynein 1 intermediate chain 2 [Sus scrofa]	1	0	0.486188	0.67407	0.468004	1.68861
gi|89197|pir||S06905 ferritin heavy chain 2 - pig (fragment)	1	0	0.187627	1.39859	2.10209	1.70334
gi|346644799|ref|NP_001231157.1| thymopoietin [Sus scrofa]	1	0	-0.697265	1.65087	1.29628	1.72163
gi|2494384|sp|Q29550.1|EST1_PIG RecName: Full=Liver carboxylesterase; AltName: Full=Proline-beta-naphthylamidase; AltName: Full=Retinyl ester hydrolase; Short=REH; Flags: Precursor >gi|363817363|emb|CCF23015.1| unnamed protein product [Sus scrofa] >gi|1931|emb|CAA44929.1| carboxyl	1	0	0.319149	0.522629	1.68374	1.74866
gi|343887438|ref|NP_001230620.1| plasma glutamate carboxypeptidase precursor [Sus scrofa]	1	0	0.674338	1.95104	1.83726	1.75449
gi|350583346|ref|XP_003125776.3| PREDICTED: ubiquitin associated protein 2-like isoform 3 [Sus scrofa]	1	0	0.008549	0.991939	1.09839	1.79382
gi|311263942|ref|XP_003129926.1| PREDICTED: oligoribonuclease, mitochondrial-like [Sus scrofa]	1	0	0.499735	0.948775	1.0773	1.80767
gi|311276184|ref|XP_003135086.1| PREDICTED: FUN14 domain-containing protein 1-like [Sus scrofa]	1	0	0.21944	0.560813	0.866867	1.81312
gi|311258366|ref|XP_003127578.1| PREDICTED: espin [Sus scrofa]	1	0	0.957222	0.714815	0.502249	1.81435
gi|350580184|ref|XP_003353965.2| PREDICTED: reticulocalbin-1-like isoform 2 [Sus scrofa]	1	0	-0.105065	0.971216	1.49795	1.83229
gi|311277231|ref|XP_003135559.1| PREDICTED: trimethyllysine dioxygenase, mitochondrial-like [Sus scrofa]	1	0	0.289642	1.50522	1.67882	1.8396
gi|350592964|ref|XP_003483582.1| PREDICTED: PDZ and LIM domain protein 1 [Sus scrofa]	1	0	0.423211	1.04836	1.14512	1.85402
gi|171948776|gb|ACB59245.1| cathepsin B [Sus scrofa]	1	0	2.41954	2.7761	2.1375	1.8679
gi|350595285|ref|XP_003484077.1| PREDICTED: N-alpha-acetyltransferase 38, NatC auxiliary subunit-like [Sus scrofa] >gi|311275562|ref|XP_003134801.1| PREDICTED: N-alpha-acetyltransferase 38, NatC auxiliary subunit-like [Sus scrofa]	1	0	0.688163	1.02701	1.38949	1.88027
gi|343488474|ref|NP_001230453.1| elongation factor 1-beta [Sus scrofa]	1	0	-0.040339	0.886952	1.03277	1.88624
gi|311262067|ref|XP_003128996.1| PREDICTED: glucosamine-6-phosphate isomerase 2-like isoform 1 [Sus scrofa] >gi|311262065|ref|XP_003128997.1| PREDICTED: glucosamine-6-phosphate isomerase 2-like isoform 2 [Sus scrofa]	1	0	1.25108	1.37631	1.23053	1.94912
gi|194040450|ref|XP_001927992.1| PREDICTED: lactoylglutathione lyase isoform 1 [Sus scrofa]	1	0	0.400107	0.166908	1.1443	1.9524
gi|311275507|ref|XP_003134773.1| PREDICTED: neural Wiskott-Aldrich syndrome protein-like [Sus scrofa]	1	0	1.03569	0.550543	0.6351	1.96703
gi|297747284|ref|NP_001172109.1| prefoldin subunit 6 [Sus scrofa] >gi|297747282|ref|NP_001172108.1| prefoldin subunit 6 [Sus scrofa]	1	0	0.316126	0.860698	1.04279	1.9955
gi|335297068|ref|XP_001927259.3| PREDICTED: CLYBL protein [Sus scrofa]	1	0	1.15257	1.93381	1.92617	2.04381
gi|54036319|sp|Q6QAP7.3|RS17_PIG RecName: Full=40S ribosomal protein S17 >gi|48675931|ref|NP_001001634.1| 40S ribosomal protein S17 [Sus scrofa] >gi|45269037|gb|AAS55931.1| 40S ribosomal protein S17 [Sus scrofa]	1	0	-0.042962	0.719577	1.01054	2.07266
gi|335294095|ref|XP_003357133.1| PREDICTED: phosphatidylinositol N-acetylglucosaminyltransferase subunit Y-like isoform 2 [Sus scrofa]	1	0	0.166147	0.942816	1.01922	2.21442
gi|80975533|gb|ABB54390.1| tropomyosin 3 [Sus scrofa]	1	0	-0.360481	1.24993	1.5145	2.30159
gi|350587379|ref|XP_003482398.1| PREDICTED: putative aminopeptidase C13A11.05-like [Sus scrofa]	1	0	-0.210726	-0.658963	2.68557	2.32931
gi|350580256|ref|XP_003480773.1| PREDICTED: nucleobindin-2 [Sus scrofa]	1	0	0.213588	1.56082	1.80203	2.33913
gi|350587377|ref|XP_003356918.2| PREDICTED: cytosol aminopeptidase-like [Sus scrofa]	1	0	-0.196987	-0.390295	2.54183	2.38022
gi|346644743|ref|NP_001231138.1| calmodulin 3 [Sus scrofa] >gi|346644746|ref|NP_001231139.1| calmodulin 1 [Sus scrofa] >gi|311252670|ref|XP_003125211.1| PREDICTED: calmodulin-like [Sus scrofa]	1	0	0.424224	1.00507	1.05793	2.41567
gi|18699289|gb|AAL78511.1|AF464049_1 MHC class I antigen [Sus scrofa]	1	0	0.162057	0.221672	0.912931	2.46607
gi|311259195|ref|XP_003127983.1| PREDICTED: plasminogen activator inhibitor 1 RNA-binding protein-like isoform 2 [Sus scrofa]	1	0	0.010323	1.77025	1.73955	2.57847
gi|178056556|ref|NP_001116620.1| probable aminopeptidase NPEPL1 [Sus scrofa] >gi|147223400|emb|CAN13197.1| aminopeptidase-like 1 [Sus scrofa]	1	0	-0.454417	0.806781	1.91357	2.61052
gi|349732201|ref|NP_001231854.1| dpy-30 homolog [Sus scrofa]	1	0	0.640698	1.76235	1.86199	2.99746
gi|190360639|ref|NP_001121941.1| interferon-induced 17 kDa protein [Sus scrofa] >gi|182406743|gb|ACB87600.1| interferon stimulated gene 15 [Sus scrofa]	1	0	0.833954	1.05943	1.82521	3.29791
gi|47523822|ref|NP_999549.1|	glutamate carboxypeptidase 2 [Sus scrofa] >gi|20138100|sp|O77564.1|FOLH1_PIG RecName: Full=Glutamate carboxypeptidase 2; AltName: Full=Folate hydrolase 1; AltName: Full=Folylpoly-gamma-glutamate carboxypeptidase; Short=FGCP; AltName: Full=Glutamate |47523822|ref|NP_999549.1|	GO:0005737	GO:0005887	GO:0046872	GO:0004180	GO:0006760	GO:0016805	GO:0006508	GO:0005634	GO:0008237
gi|311252444|ref|XP_003125100.1|	PREDICTED: small nuclear ribonucleoprotein G-like [Sus scrofa]|311252444|ref|XP_003125100.1|	GO:0005829	GO:0003723	GO:0006369	GO:0005683	GO:0000245	GO:0000387	GO:0008334	GO:0005515	GO:0034660	GO:0071013	GO:0005654	GO:0005689
gi|342187294|ref|NP_001230119.1|	syndecan-1 precursor [Sus scrofa]|342187294|ref|NP_001230119.1|	GO:0005925	GO:0008022	GO:0006027	GO:0010033	GO:0030204	GO:0048513	GO:0042157	GO:0055002	GO:0005975	GO:0005796	GO:0006024	GO:0006629	GO:0048627	GO:0044281	GO:0010035	GO:0006950	GO:0043202	GO:0005887
gi|350580865|ref|XP_003123779.3|	PREDICTED: tubulin-specific chaperone A-like [Sus scrofa]|350580865|ref|XP_003123779.3|	GO:0005730	GO:0051087	GO:0051084	GO:0007023	GO:0005829	GO:0015630
gi|311263676|ref|XP_003129789.1|	PREDICTED: dipeptidyl peptidase 1-like [Sus scrofa]|311263676|ref|XP_003129789.1|	GO:0004252	GO:0005764	GO:0001913	GO:0031638	GO:0006508	GO:0008234
gi|343962595|ref|NP_001230634.1|	thioredoxin, mitochondrial [Sus scrofa]|343962595|ref|NP_001230634.1|	GO:0001666	GO:0006979	GO:0006662	GO:0006810	GO:0008113	GO:0009749	GO:0022900	GO:0009725	GO:0005739	GO:0005730	GO:0031669	GO:0030425	GO:0045454	GO:0007584	GO:0032403	GO:0009055	GO:0033743	GO:0014070	GO:0043025	GO:0042493	GO:0048678	GO:0015035
gi|47522844|ref|NP_999174.1|	complement C3 precursor [Sus scrofa] >gi|11869931|gb|AAG40565.1|AF154933_1 complement component C3 [Sus scrofa] >gi|27801787|emb|CAD38823.2| complement C3 precursor [Sus scrofa]|47522844|ref|NP_999174.1|	GO:0031715	GO:0002507	GO:0048037	GO:0008289	GO:0070374	GO:0006958	GO:0010828	GO:0051384	GO:0045766	GO:0010575	GO:0006957	GO:0007596	GO:0005615	GO:0001798	GO:0001934	GO:0006935	GO:0005886	GO:0032026	GO:0048639	GO:0032570	GO:0001970	GO:0010951	GO:0050766	GO:0010884	GO:0010866	GO:0004866	GO:0032355	GO:0045745
gi|335310367|ref|XP_003361999.1|	PREDICTED: heterogeneous nuclear ribonucleoprotein H2-like [Sus scrofa]|335310367|ref|XP_003361999.1|	GO:0043484	GO:0008266	GO:0005730	GO:0000398	GO:0005515	GO:0015629	GO:0000166	GO:0071013	GO:0005654	GO:0005737
gi|343780936|ref|NP_001230484.1|	heterogeneous nuclear ribonucleoprotein H3 [Sus scrofa]|343780936|ref|NP_001230484.1|	GO:0005730	GO:0003723	GO:0000398	GO:0030529	GO:0000166
gi|305855176|ref|NP_001182260.1|	cleavage and polyadenylation specificity factor subunit 6 [Sus scrofa] >gi|285818464|gb|ADC38905.1| cleavage and polyadenylation specific factor 6 [Sus scrofa]|305855176|ref|NP_001182260.1|	GO:0042382	GO:0003729	GO:0005730	GO:0006378	GO:0005849	GO:0051262	GO:0005515	GO:0000166	GO:0030529
gi|350580651|ref|XP_003480867.1|	PREDICTED: scaffold attachment factor B1-like isoform 2 [Sus scrofa]|350580651|ref|XP_003480867.1|	GO:0001047	GO:0003723	GO:0003690	GO:0042445	GO:0005730	GO:0045944	GO:0040007	GO:0030520	GO:0005515	GO:0000166	GO:0006325	GO:0003682
gi|194036227|ref|XP_001929678.1|	PREDICTED: selenium-binding protein 1 [Sus scrofa]|194036227|ref|XP_001929678.1|	GO:0005730	GO:0008430	GO:0005515	GO:0016020	GO:0005829	GO:0015031
gi|335309827|ref|XP_003361787.1|	PREDICTED: nuclear autoantigenic sperm protein, partial [Sus scrofa]|335309827|ref|XP_003361787.1|	GO:0007049	GO:0051879	GO:0006260	GO:0001824	GO:0043486	GO:0008283	GO:0005634
gi|350592457|ref|XP_001929016.4|	PREDICTED: CAP-Gly domain-containing linker protein 1 [Sus scrofa]|350592457|ref|XP_001929016.4|	GO:0005829	GO:0006810	GO:0030659	GO:0001726	GO:0001578	GO:0008270	GO:0003676	GO:0051010	GO:0005813	GO:0005881	GO:0000776	GO:0035371	GO:0044354	GO:0000236	GO:0042803	GO:0005882	GO:0031116
gi|346986249|ref|NP_001231282.1|	proteasome subunit beta type-1 [Sus scrofa]|346986249|ref|NP_001231282.1|	GO:0000209	GO:0005654	GO:0005515	GO:0006521	GO:0051437	GO:0042981	GO:0010467	GO:0051436	GO:0004298	GO:0005839	GO:0005829	GO:0002479	GO:0019048	GO:0000084	GO:0000216	GO:0031145	GO:0016071	GO:0006977
gi|350586921|ref|XP_003482304.1|	PREDICTED: LOW QUALITY PROTEIN: apoptotic chromatin condensation inducer in the nucleus-like [Sus scrofa]|350586921|ref|XP_003482304.1|	GO:0045657	GO:0005730	GO:0005829	GO:0003676	GO:0030218	GO:0030263	GO:0016887	GO:0006200	GO:0019899
gi|335310692|ref|XP_003362151.1|	PREDICTED: protein LZIC-like [Sus scrofa]|335310692|ref|XP_003362151.1|	GO:0010212	GO:0007417	GO:0008013
gi|113205878|ref|NP_001038072.1|	delta(3,5)-Delta(2,4)-dienoyl-CoA isomerase, mitochondrial [Sus scrofa] >gi|90024980|gb|AAZ82038.2| peroxisomal enoyl coenzyme A hydratase 1 [Sus scrofa]|113205878|ref|NP_001038072.1|	GO:0046872	GO:0005777	GO:0006635	GO:0005102	GO:0016853	GO:0005739
gi|62529273|gb|AAX84942.1|	type III calpastatin [Sus scrofa]|62529273|gb|AAX84942.1|	GO:0030163
gi|350583407|ref|XP_003481511.1|	PREDICTED: cathepsin S [Sus scrofa]|350583407|ref|XP_003481511.1|	GO:0045087	GO:0002480	GO:0006508	GO:0004197	GO:0036021	GO:0005515	GO:0097067	GO:0019886	GO:0005576	GO:0002250	GO:0016020
gi|311247993|ref|XP_003122918.1|	PREDICTED: probable methylthioribulose-1-phosphate dehydratase-like [Sus scrofa]|311247993|ref|XP_003122918.1|	GO:0046570	GO:0019509	GO:0005829	GO:0046872	GO:0042802	GO:0006595	GO:0043066
gi|346421423|ref|NP_001231086.1|	peptidyl-prolyl cis-trans isomerase FKBP3 [Sus scrofa]|346421423|ref|NP_001231086.1|	GO:0004872	GO:0006457	GO:0005528	GO:0000413	GO:0016020	GO:0005634	GO:0003755
gi|312062797|ref|NP_001185848.1|	proactivator polypeptide precursor [Sus scrofa] >gi|310789269|gb|ADP24688.1| prosaposin variant 2 [Sus scrofa]|312062797|ref|NP_001185848.1|	GO:0007585	GO:0030246	GO:0030168	GO:0005515	GO:0006869	GO:0006919	GO:0043408	GO:0005615	GO:0008047	GO:0005743	GO:0016021	GO:0005765	GO:0060736	GO:0071310	GO:0005794	GO:0019216	GO:0005319	GO:0006687	GO:0043065	GO:0044281	GO:0002576	GO:0008289	GO:0005581	GO:0043202	GO:0045161	GO:0060742	GO:0006644
gi|335287837|ref|XP_001926233.3|	PREDICTED: prefoldin subunit 5-like isoform 1 [Sus scrofa]|335287837|ref|XP_001926233.3|	GO:0051086	GO:0003714	GO:0090090	GO:0051082	GO:0060041	GO:0045892	GO:0016272	GO:0005634
gi|114689|sp|P13618.1|ATP5J_PIG	RecName: Full=ATP synthase-coupling factor 6, mitochondrial; Short=ATPase subunit F6|114689|sp|P13618.1|ATP5J_PIG	GO:0015078	GO:0000276	GO:0015986	GO:0006200	GO:0016887
gi|155369760|ref|NP_001094498.1|	peroxisomal acyl-coenzyme A oxidase 1 [Sus scrofa] >gi|112292673|gb|ABI14815.1| palmitoyl acyl-CoA oxidase 1 [Sus scrofa]|155369760|ref|NP_001094498.1|	GO:0000038	GO:0047485	GO:0003995	GO:0006693	GO:0036109	GO:0005739	GO:0003997	GO:0033540	GO:0006091	GO:0007283	GO:0005778	GO:0005102	GO:0050660	GO:0005782
gi|162952052|ref|NP_001106151.1|	transketolase [Sus scrofa] >gi|159502444|gb|ABW97521.1| transketolase [Sus scrofa]|162952052|ref|NP_001106151.1|	GO:0042803	GO:0048146	GO:0046390	GO:0005777	GO:0045669	GO:0048029	GO:0051091	GO:0018108	GO:0005829	GO:0030199	GO:0000287	GO:0005999	GO:0004802	GO:0010763	GO:0090091	GO:0035988	GO:0006112	GO:0040008	GO:0005887	GO:0003416	GO:0046166	GO:0005524	GO:0038062	GO:0046777	GO:0009052	GO:0007155	GO:0005518	GO:0030500	GO:0038063	GO:0005730	GO:0045860	GO:0030976	GO:0005789
gi|194044484|ref|XP_001929185.1|	PREDICTED: eukaryotic translation initiation factor 2 subunit 2 [Sus scrofa]|194044484|ref|XP_001929185.1|	GO:0046872	GO:0006413	GO:0005515	GO:0005850	GO:0003743	GO:0005829
gi|311248940|ref|XP_003123387.1|	PREDICTED: growth arrest and DNA damage-inducible proteins-interacting protein 1-like [Sus scrofa]|311248940|ref|XP_003123387.1|	GO:0005515	GO:0043231
gi|194034889|ref|XP_001929437.1|	PREDICTED: zinc finger FYVE domain-containing protein 19 [Sus scrofa]|194034889|ref|XP_001929437.1|	GO:0008270
gi|335289428|ref|XP_003127055.2|	PREDICTED: hypothetical protein LOC100523791 [Sus scrofa]|335289428|ref|XP_003127055.2|	GO:0005737	GO:0006917	GO:0003677	GO:0005634
gi|335307979|ref|XP_003361054.1|	PREDICTED: abhydrolase domain-containing protein 10, mitochondrial-like [Sus scrofa]|335307979|ref|XP_003361054.1|	GO:0004553	GO:0019391	GO:0008236	GO:0006508	GO:0005829	GO:0005739
gi|346986241|ref|NP_001231394.1|	neurocalcin delta [Sus scrofa] >gi|346986243|ref|NP_001231395.1| neurocalcin delta [Sus scrofa]|346986241|ref|NP_001231394.1|	GO:0016192	GO:0005829	GO:0005509	GO:0030130	GO:0030276	GO:0043014	GO:0003779	GO:0007268
gi|298104078|ref|NP_001177106.1|	bcl-2-associated transcription factor 1 [Sus scrofa]|298104078|ref|NP_001177106.1|	GO:0005515	GO:2000144	GO:0045892	GO:0005737	GO:0005730	GO:0006917	GO:0003677	GO:0043620	GO:2001022	GO:2001244
gi|343488538|ref|NP_001230424.1|	cytoplasmic dynein 1 intermediate chain 2 [Sus scrofa]|343488538|ref|NP_001230424.1|	GO:0003777	GO:0005829	GO:0006810	GO:0005874	GO:0000086	GO:0032403	GO:0005813	GO:0031982	GO:0005868	GO:0007018	GO:0019048	GO:0019886
gi|89197|pir||S06905	ferritin heavy chain 2 - pig (fragment)|89197|pir||S06905	GO:0055085	GO:0008043	GO:0005829	GO:0008199	GO:0055114	GO:0005739	GO:0006892	GO:0004322	GO:0016044	GO:0006955	GO:0006880	GO:0006826	GO:0005515	GO:0048147
gi|346644799|ref|NP_001231157.1|	thymopoietin [Sus scrofa]|346644799|ref|NP_001231157.1|	GO:0016021	GO:0006355	GO:0003677	GO:0000785	GO:0005515	GO:0005637
gi|2494384|sp|Q29550.1|EST1_PIG	RecName: Full=Liver carboxylesterase; AltName: Full=Proline-beta-naphthylamidase; AltName: Full=Retinyl ester hydrolase; Short=REH; Flags: Precursor >gi|363817363|emb|CCF23015.1| unnamed protein product [Sus scrofa] >gi|1931|emb|CAA44929.1| carboxyl|2494384|sp|Q29550.1|EST1_PIG	GO:0016787
gi|343887438|ref|NP_001230620.1|	plasma glutamate carboxypeptidase precursor [Sus scrofa]|343887438|ref|NP_001230620.1|	GO:0005764	GO:0004180	GO:0046872	GO:0043171	GO:0005615	GO:0006508	GO:0070573	GO:0042803	GO:0006590	GO:0005783	GO:0005794	GO:0042246
gi|350583346|ref|XP_003125776.3|	PREDICTED: ubiquitin associated protein 2-like isoform 3 [Sus scrofa]|350583346|ref|XP_003125776.3|	GO:0005671	GO:0007339	GO:0005515
gi|311263942|ref|XP_003129926.1|	PREDICTED: oligoribonuclease, mitochondrial-like [Sus scrofa]|311263942|ref|XP_003129926.1|	GO:0005730	GO:0003676	GO:0005886	GO:0008408	GO:0016896	GO:0009117	GO:0005739
gi|311276184|ref|XP_003135086.1|	PREDICTED: FUN14 domain-containing protein 1-like [Sus scrofa]|311276184|ref|XP_003135086.1|	GO:0000422	GO:0005515	GO:0001666	GO:0031307
gi|311258366|ref|XP_003127578.1|	PREDICTED: espin [Sus scrofa]|311258366|ref|XP_003127578.1|	GO:0032426	GO:0030046	GO:0005903	GO:0051015	GO:0007626	GO:0031941	GO:0051491	GO:0051494	GO:0005902	GO:0005737	GO:0017124
gi|350580184|ref|XP_003353965.2|	PREDICTED: reticulocalbin-1-like isoform 2 [Sus scrofa]|350580184|ref|XP_003353965.2|	GO:0005788	GO:0001701	GO:0005515	GO:0005509	GO:0043010
gi|311277231|ref|XP_003135559.1|	PREDICTED: trimethyllysine dioxygenase, mitochondrial-like [Sus scrofa]|311277231|ref|XP_003135559.1|	GO:0055114	GO:0050353	GO:0045329	GO:0016702	GO:0031418	GO:0005759	GO:0051354	GO:0005506
gi|350592964|ref|XP_003483582.1|	PREDICTED: PDZ and LIM domain protein 1 [Sus scrofa]|350592964|ref|XP_003483582.1|	GO:0001666	GO:0006979	GO:0008270	GO:0005856	GO:0006355	GO:0005667	GO:0003713	GO:0005737
gi|171948776|gb|ACB59245.1|	cathepsin B [Sus scrofa]|171948776|gb|ACB59245.1|	GO:0042277	GO:0009749	GO:0030984	GO:0009897	GO:0005739	GO:0045471	GO:0005901	GO:0009611	GO:0005615	GO:0045087	GO:0006508	GO:0043434	GO:0004197	GO:0036021	GO:0042470	GO:0007519	GO:0014070	GO:0042981	GO:0070670	GO:0048471	GO:0016324	GO:0097067	GO:0042383	GO:0050790	GO:0014075	GO:0060548	GO:0006914	GO:0009612
gi|350595285|ref|XP_003484077.1|	PREDICTED: N-alpha-acetyltransferase 38, NatC auxiliary subunit-like [Sus scrofa] >gi|311275562|ref|XP_003134801.1| PREDICTED: N-alpha-acetyltransferase 38, NatC auxiliary subunit-like [Sus scrofa]|350595285|ref|XP_003484077.1|	GO:0017070	GO:0000398	GO:0005515	GO:0016740	GO:0030529	GO:0005634
gi|343488474|ref|NP_001230453.1|	elongation factor 1-beta [Sus scrofa]|343488474|ref|NP_001230453.1|	GO:0003746	GO:0005853	GO:0005515	GO:0005829	GO:0006414
gi|311262067|ref|XP_003128996.1|	PREDICTED: glucosamine-6-phosphate isomerase 2-like isoform 1 [Sus scrofa] >gi|311262065|ref|XP_003128997.1| PREDICTED: glucosamine-6-phosphate isomerase 2-like isoform 2 [Sus scrofa]|311262067|ref|XP_003128996.1|	GO:0005975	GO:0005737	GO:0006044	GO:0016787	GO:0004342
gi|194040450|ref|XP_001927992.1|	PREDICTED: lactoylglutathione lyase isoform 1 [Sus scrofa]|194040450|ref|XP_001927992.1|	GO:0006357	GO:0046872	GO:0005975	GO:0006749	GO:0006916	GO:0004462	GO:0009438	GO:0005737
gi|311275507|ref|XP_003134773.1|	PREDICTED: neural Wiskott-Aldrich syndrome protein-like [Sus scrofa]|311275507|ref|XP_003134773.1|	GO:0007411	GO:0034629	GO:0010324	GO:0030027	GO:0000139	GO:0030666	GO:0030478	GO:0008154	GO:0006461	GO:2000370	GO:0006900	GO:0006355	GO:0009617	GO:0005083	GO:0097320	GO:0005730	GO:0005829	GO:0003779	GO:0050999	GO:0044281	GO:0046209	GO:0051653	GO:0005886	GO:0030050	GO:0051491
gi|297747284|ref|NP_001172109.1|	prefoldin subunit 6 [Sus scrofa] >gi|297747282|ref|NP_001172108.1| prefoldin subunit 6 [Sus scrofa]|297747284|ref|NP_001172109.1|	GO:0051086	GO:0051087	GO:0051082	GO:0016272	GO:0005634	GO:0051131
gi|335297068|ref|XP_001927259.3|	PREDICTED: CLYBL protein [Sus scrofa]|335297068|ref|XP_001927259.3|	GO:0046872	GO:0008815	GO:0006725	GO:0005739	GO:0009346
gi|54036319|sp|Q6QAP7.3|RS17_PIG	RecName: Full=40S ribosomal protein S17 >gi|48675931|ref|NP_001001634.1| 40S ribosomal protein S17 [Sus scrofa] >gi|45269037|gb|AAS55931.1| 40S ribosomal protein S17 [Sus scrofa]|54036319|sp|Q6QAP7.3|RS17_PIG	GO:0006413	GO:0019083	GO:0006364	GO:0003735	GO:0034101	GO:0006414	GO:0022627	GO:0006415	GO:0000028	GO:0006614	GO:0016787	GO:0000184
gi|335294095|ref|XP_003357133.1|	PREDICTED: phosphatidylinositol N-acetylglucosaminyltransferase subunit Y-like isoform 2 [Sus scrofa]|335294095|ref|XP_003357133.1|	GO:0005789	GO:0006506	GO:0005886	GO:0005515	GO:0009893	GO:0000506	GO:0005739
gi|80975533|gb|ABB54390.1|	tropomyosin 3 [Sus scrofa]|80975533|gb|ABB54390.1|	GO:0005829	GO:0048856	GO:0030049	GO:0001725	GO:0005862	GO:0003779	GO:0060047	GO:0006937	GO:0007275
gi|350587379|ref|XP_003482398.1|	PREDICTED: putative aminopeptidase C13A11.05-like [Sus scrofa]|350587379|ref|XP_003482398.1|	GO:0005730	GO:0030145	GO:0008235	GO:0004177	GO:0000287	GO:0006508	GO:0008270	GO:0005739
gi|350580256|ref|XP_003480773.1|	PREDICTED: nucleobindin-2 [Sus scrofa]|350580256|ref|XP_003480773.1|	GO:0005797	GO:0005615	GO:0003677	GO:0005640	GO:0005886	GO:0005793	GO:0005509	GO:0005829	GO:0005783	GO:0005164
gi|350587377|ref|XP_003356918.2|	PREDICTED: cytosol aminopeptidase-like [Sus scrofa]|350587377|ref|XP_003356918.2|	GO:0005730	GO:0030145	GO:0008235	GO:0004177	GO:0006508	GO:0005802	GO:0005739
gi|346644743|ref|NP_001231138.1|	calmodulin 3 [Sus scrofa] >gi|346644746|ref|NP_001231139.1| calmodulin 1 [Sus scrofa] >gi|311252670|ref|XP_003125211.1| PREDICTED: calmodulin-like [Sus scrofa]|346644743|ref|NP_001231138.1|	GO:0060316	GO:0006006	GO:0050804	GO:0043548	GO:0000082	GO:0017022	GO:0031997	GO:0006470	GO:0005102	GO:0005829	GO:0060315	GO:0048011	GO:0005654	GO:0060079	GO:0030168	GO:0001975	GO:0016310	GO:0007202	GO:0051592	GO:0005246	GO:0005955	GO:0032465	GO:0045944	GO:0044281	GO:0005876	GO:0005886	GO:0006936	GO:0000922	GO:0048741	GO:0002576	GO:0006606	GO:0019904	GO:0051412	GO:0005739	GO:0007173	GO:0046209	GO:0031432	GO:0014883	GO:0048306	GO:0031996	GO:0043274	GO:0007186	GO:0010880	GO:0033173	GO:0005516	GO:0033192	GO:0005980	GO:0050999
gi|311259195|ref|XP_003127983.1|	PREDICTED: plasminogen activator inhibitor 1 RNA-binding protein-like isoform 2 [Sus scrofa]|311259195|ref|XP_003127983.1|	GO:0005737	GO:0003730	GO:0005886	GO:0005515	GO:0045767
gi|178056556|ref|NP_001116620.1|	probable aminopeptidase NPEPL1 [Sus scrofa] >gi|147223400|emb|CAN13197.1| aminopeptidase-like 1 [Sus scrofa]|178056556|ref|NP_001116620.1|	GO:0005737	GO:0006508	GO:0030145	GO:0008235	GO:0004177
gi|349732201|ref|NP_001231854.1|	dpy-30 homolog [Sus scrofa]|349732201|ref|NP_001231854.1|	GO:0048188	GO:0005730	GO:0006355	GO:0051568	GO:0016197	GO:0005802	GO:0042803	GO:0005794
[truncated: 7 more columns]

## Sheet: bin 3
Gene	NAME	GWEIGHT	114	115	116	117	118
EWEIGHT			1	1	1	1	1
gi|178056703|ref|NP_001116542.1| angiotensin-converting enzyme 2 precursor [Sus scrofa] >gi|170066580|gb|ACB06678.1| angiotensin converting enzyme 2 [Sus scrofa]	gi|178056703|ref|NP_001116542.1| angiotensin-converting enzyme 2 precursor [Sus scrofa] >gi|170066580|gb|ACB06678.1| angiotensin converting enzyme 2 [Sus scrofa]	1	0	-0.041083	0.485151	0.226245	-0.00193
gi|347300387|ref|NP_001231487.1| 60S ribosomal protein L17 [Sus scrofa]	gi|347300387|ref|NP_001231487.1| 60S ribosomal protein L17 [Sus scrofa]	1	0	0.313109	0.68778	-0.1627	0.009957
gi|62511144|sp|Q764M5.1|STAT1_PIG RecName: Full=Signal transducer and activator of transcription 1 >gi|47523306|ref|NP_998934.1| signal transducer and activator of transcription 1 [Sus scrofa] >gi|40363629|dbj|BAD06318.1| signal transducer and activator of transcription 1 [Sus scrof	gi|62511144|sp|Q764M5.1|STAT1_PIG RecName: Full=Signal transducer and activator of transcription 1 >gi|47523306|ref|NP_998934.1| signal transducer and activator of transcription 1 [Sus scrofa] >gi|40363629|dbj|BAD06318.1| signal transducer and activator of transcription 1 [Sus scrof	1	0	0.289397	0.230258	0.252595	0.046066
gi|335301749|ref|XP_001925115.3| PREDICTED: inorganic pyrophosphatase [Sus scrofa]	gi|335301749|ref|XP_001925115.3| PREDICTED: inorganic pyrophosphatase [Sus scrofa]	1	0	0.532132	0.460578	0.391716	0.071791
gi|122143720|sp|Q19QT7.1|CGL_PIG RecName: Full=Cystathionine gamma-lyase; AltName: Full=Cysteine-protein sulfhydrase; AltName: Full=Gamma-cystathionase >gi|113205776|ref|NP_001038050.1| cystathionine gamma-lyase [Sus scrofa] >gi|104295139|gb|ABF72039.1| cystathionase [Sus scrofa]	gi|122143720|sp|Q19QT7.1|CGL_PIG RecName: Full=Cystathionine gamma-lyase; AltName: Full=Cysteine-protein sulfhydrase; AltName: Full=Gamma-cystathionase >gi|113205776|ref|NP_001038050.1| cystathionine gamma-lyase [Sus scrofa] >gi|104295139|gb|ABF72039.1| cystathionase [Sus scrofa]	1	0	0.57616	0.066875	0.466117	0.091792
gi|350588026|ref|XP_003129409.3| PREDICTED: heterogeneous nuclear ribonucleoprotein D-like, partial [Sus scrofa]	gi|350588026|ref|XP_003129409.3| PREDICTED: heterogeneous nuclear ribonucleoprotein D-like, partial [Sus scrofa]	1	0	-0.185428	1.07896	0.315942	0.093028
gi|295444972|ref|NP_001171396.1| alpha-galactosidase A [Sus scrofa] >gi|188998336|gb|ACD67895.1| alpha-galactosidase A [Sus scrofa] >gi|188998339|gb|ACD67896.1| alpha-galactosidase A [Sus scrofa]	gi|295444972|ref|NP_001171396.1| alpha-galactosidase A [Sus scrofa] >gi|188998336|gb|ACD67895.1| alpha-galactosidase A [Sus scrofa] >gi|188998339|gb|ACD67896.1| alpha-galactosidase A [Sus scrofa]	1	0	0.616973	0.061112	0.397592	0.10046
gi|350580873|ref|XP_003123770.3| PREDICTED: ras GTPase-activating-like protein IQGAP2-like [Sus scrofa]	gi|350580873|ref|XP_003123770.3| PREDICTED: ras GTPase-activating-like protein IQGAP2-like [Sus scrofa]	1	0	0.433678	-0.00259	0.217022	0.120346
gi|2500494|sp|Q29308.3|RS19_PIG RecName: Full=40S ribosomal protein S19	gi|2500494|sp|Q29308.3|RS19_PIG RecName: Full=40S ribosomal protein S19	1	0	-0.115252	0.826525	0.350815	0.163306
gi|335294004|ref|XP_003357107.1| PREDICTED: CDGSH iron-sulfur domain-containing protein 2-like [Sus scrofa]	gi|335294004|ref|XP_003357107.1| PREDICTED: CDGSH iron-sulfur domain-containing protein 2-like [Sus scrofa]	1	0	0.634877	0.415037	0.266601	0.164094
gi|350539097|ref|NP_001233144.1| ubiquitin/ISG15-conjugating enzyme E2 L6 [Sus scrofa] >gi|332113317|gb|AEE02035.1| ubiquitin-conjugating enzyme E2L 6 [Sus scrofa]	gi|350539097|ref|NP_001233144.1| ubiquitin/ISG15-conjugating enzyme E2 L6 [Sus scrofa] >gi|332113317|gb|AEE02035.1| ubiquitin-conjugating enzyme E2L 6 [Sus scrofa]	1	0	-0.223348	0.039563	1.01457	0.187223
gi|335292368|ref|XP_001926489.3| PREDICTED: calcium and integrin-binding protein 1 [Sus scrofa]	gi|335292368|ref|XP_001926489.3| PREDICTED: calcium and integrin-binding protein 1 [Sus scrofa]	1	0	0.612339	0.245557	0.062585	0.209133
gi|311257796|ref|XP_003127291.1| PREDICTED: SUMO-activating enzyme subunit 1-like isoform 1 [Sus scrofa]	gi|311257796|ref|XP_003127291.1| PREDICTED: SUMO-activating enzyme subunit 1-like isoform 1 [Sus scrofa]	1	0	0.187546	0.400938	0.58826	0.210553
gi|350582454|ref|XP_003125231.3| PREDICTED: LOW QUALITY PROTEIN: leucine-rich PPR motif-containing protein, mitochondrial [Sus scrofa]	gi|350582454|ref|XP_003125231.3| PREDICTED: LOW QUALITY PROTEIN: leucine-rich PPR motif-containing protein, mitochondrial [Sus scrofa]	1	0	0.237572	-0.030057	0.471062	0.222586
gi|350584261|ref|XP_003481707.1| PREDICTED: ras-related protein Rab-21-like [Sus scrofa]	gi|350584261|ref|XP_003481707.1| PREDICTED: ras-related protein Rab-21-like [Sus scrofa]	1	0	0.61793	-0.098032	0.315596	0.235123		bi
gi|350584879|ref|XP_003126924.3| PREDICTED: alanyl-tRNA synthetase, cytoplasmic [Sus scrofa]	gi|350584879|ref|XP_003126924.3| PREDICTED: alanyl-tRNA synthetase, cytoplasmic [Sus scrofa]	1	0	0.53684	-0.082164	0.144631	0.251792
gi|217039113|gb|ACJ76845.1| HDL binding protein [Sus scrofa]	gi|217039113|gb|ACJ76845.1| HDL binding protein [Sus scrofa]	1	0	0.107403	-0.407472	-0.017168	0.251994
gi|350529411|ref|NP_001231937.1| proteasome (prosome, macropain) 26S subunit, ATPase, 2 [Sus scrofa]	gi|350529411|ref|NP_001231937.1| proteasome (prosome, macropain) 26S subunit, ATPase, 2 [Sus scrofa]	1	0	0.224815	-0.237797	0.406526	0.270089
gi|264681442|ref|NP_001161116.1| dynactin subunit 6 [Sus scrofa] >gi|262072943|dbj|BAI47779.1| dynactin 6 [Sus scrofa]	gi|264681442|ref|NP_001161116.1| dynactin subunit 6 [Sus scrofa] >gi|262072943|dbj|BAI47779.1| dynactin 6 [Sus scrofa]	1	0	0.181475	0.111221	0.076709	0.274077
gi|113205666|ref|NP_001038019.1| NADH dehydrogenase 1 beta subcomplex 6 [Sus scrofa] >gi|87047638|gb|ABD18452.1| NADH dehydrogenase 1 beta subcomplex 6 [Sus scrofa]	gi|113205666|ref|NP_001038019.1| NADH dehydrogenase 1 beta subcomplex 6 [Sus scrofa] >gi|87047638|gb|ABD18452.1| NADH dehydrogenase 1 beta subcomplex 6 [Sus scrofa]	1	0	0.352722	0.116124	0.488578	0.280108
gi|350593080|ref|XP_001927062.4| PREDICTED: LOW QUALITY PROTEIN: uncharacterized protein C10orf118 [Sus scrofa]	gi|350593080|ref|XP_001927062.4| PREDICTED: LOW QUALITY PROTEIN: uncharacterized protein C10orf118 [Sus scrofa]	1	0	0.033692	0.223649	0.636094	0.292602
gi|311249625|ref|XP_003123708.1| PREDICTED: FAS-associated factor 2 [Sus scrofa]	gi|311249625|ref|XP_003123708.1| PREDICTED: FAS-associated factor 2 [Sus scrofa]	1	0	0.703156	0.114241	0.215952	0.314842
gi|347300207|ref|NP_001231417.1| nucleobindin-1 precursor [Sus scrofa]	gi|347300207|ref|NP_001231417.1| nucleobindin-1 precursor [Sus scrofa]	1	0	-0.047587	0.295283	0.357986	0.317239
gi|47523790|ref|NP_999531.1| serine/threonine-protein phosphatase 2A catalytic subunit alpha isoform [Sus scrofa] >gi|54038797|sp|P67776.1|PP2AA_PIG RecName: Full=Serine/threonine-protein phosphatase 2A catalytic subunit alpha isoform; Short=PP2A-alpha >gi|164296|gb|AAA30981.1|	gi|47523790|ref|NP_999531.1| serine/threonine-protein phosphatase 2A catalytic subunit alpha isoform [Sus scrofa] >gi|54038797|sp|P67776.1|PP2AA_PIG RecName: Full=Serine/threonine-protein phosphatase 2A catalytic subunit alpha isoform; Short=PP2A-alpha >gi|164296|gb|AAA30981.1|	1	0	0.772692	0.08573	0.016727	0.327805
gi|335282824|ref|XP_003123501.2| PREDICTED: ilvB (bacterial acetolactate synthase)-like [Sus scrofa]	gi|335282824|ref|XP_003123501.2| PREDICTED: ilvB (bacterial acetolactate synthase)-like [Sus scrofa]	1	0	0.802202	0.013143	0.101934	0.330067
gi|343887362|ref|NP_001230582.1| small nuclear ribonucleoprotein Sm D2 [Sus scrofa]	gi|343887362|ref|NP_001230582.1| small nuclear ribonucleoprotein Sm D2 [Sus scrofa]	1	0	-0.070539	0.791014	0.721014	0.35038
gi|311244324|ref|XP_001925172.2| PREDICTED: NEDD9-interacting protein with calponin homology and LIM domains isoform 1 [Sus scrofa]	gi|311244324|ref|XP_001925172.2| PREDICTED: NEDD9-interacting protein with calponin homology and LIM domains isoform 1 [Sus scrofa]	1	0	0.194771	0.231483	0.334977	0.360393
gi|166796059|ref|NP_001107755.1| aminoacyl tRNA synthase complex-interacting multifunctional protein 1 [Sus scrofa] >gi|164598078|gb|ABY61326.1| small inducible cytokine subfamily E member 1 [Sus scrofa]	gi|166796059|ref|NP_001107755.1| aminoacyl tRNA synthase complex-interacting multifunctional protein 1 [Sus scrofa] >gi|164598078|gb|ABY61326.1| small inducible cytokine subfamily E member 1 [Sus scrofa]	1	0	0.166713	0.143895	0.12707	0.367183
gi|335281589|ref|XP_003353840.1| PREDICTED: 1-phosphatidylinositol-4,5-bisphosphate phosphodiesterase beta-3 isoform 2 [Sus scrofa]	gi|335281589|ref|XP_003353840.1| PREDICTED: 1-phosphatidylinositol-4,5-bisphosphate phosphodiesterase beta-3 isoform 2 [Sus scrofa]	1	0	0.293399	0.200976	0.179979	0.379287
gi|335284508|ref|XP_003124605.2| PREDICTED: mu-crystallin homolog [Sus scrofa]	gi|335284508|ref|XP_003124605.2| PREDICTED: mu-crystallin homolog [Sus scrofa]	1	0	0.902009	0.022207	0.26998	0.386409
gi|227430407|ref|NP_001153087.1| keratin, type II cytoskeletal 8 [Sus scrofa]	gi|227430407|ref|NP_001153087.1| keratin, type II cytoskeletal 8 [Sus scrofa]	1	0	-0.056584	0.686371	0.125346	0.387023
gi|385137156|ref|NP_001245232.1| kinectin 1 (kinesin receptor) [Sus scrofa]	gi|385137156|ref|NP_001245232.1| kinectin 1 (kinesin receptor) [Sus scrofa]	1	0	-0.084547	0.499846	0.46294	0.387402
gi|345100481|pdb|1C9P|A Chain A, Complex Of Bdellastasin With Porcine Trypsin >gi|3318722|pdb|1AN1|E Chain E, Leech-Derived Tryptase InhibitorTRYPSIN COMPLEX	gi|345100481|pdb|1C9P|A Chain A, Complex Of Bdellastasin With Porcine Trypsin >gi|3318722|pdb|1AN1|E Chain E, Leech-Derived Tryptase InhibitorTRYPSIN COMPLEX	1	0	0.177854	1.02744	0.328836	0.388245
gi|350592508|ref|XP_001925814.4| PREDICTED: putative phospholipase B-like 2-like isoform 1 [Sus scrofa]	gi|350592508|ref|XP_001925814.4| PREDICTED: putative phospholipase B-like 2-like isoform 1 [Sus scrofa]	1	0	0.443189	0.021165	0.122567	0.389947
gi|350579323|ref|XP_003122006.3| PREDICTED: retinal dehydrogenase 1-like, partial [Sus scrofa]	gi|350579323|ref|XP_003122006.3| PREDICTED: retinal dehydrogenase 1-like, partial [Sus scrofa]	1	0	0.01692	0.87128	0.323329	0.392079
gi|194036463|ref|XP_001928684.1| PREDICTED: ras-related protein Rap-1A isoform 1 [Sus scrofa] >gi|335287176|ref|XP_003355289.1| PREDICTED: ras-related protein Rap-1A isoform 2 [Sus scrofa]	gi|194036463|ref|XP_001928684.1| PREDICTED: ras-related protein Rap-1A isoform 1 [Sus scrofa] >gi|335287176|ref|XP_003355289.1| PREDICTED: ras-related protein Rap-1A isoform 2 [Sus scrofa]	1	0	0.563901	-0.249587	0.453718	0.419855
gi|350592919|ref|XP_001924466.4| PREDICTED: neutral ceramidase [Sus scrofa]	gi|350592919|ref|XP_001924466.4| PREDICTED: neutral ceramidase [Sus scrofa]	1	0	0.306814	0.165543	0.659381	0.434152
gi|350595031|ref|XP_003360089.2| PREDICTED: double-stranded RNA-binding protein Staufen homolog 1 [Sus scrofa]	gi|350595031|ref|XP_003360089.2| PREDICTED: double-stranded RNA-binding protein Staufen homolog 1 [Sus scrofa]	1	0	-0.078238	0.058047	0.2816	0.438121
gi|350593954|ref|XP_003133749.3| PREDICTED: arf-GAP domain and FG repeats-containing protein 1-like [Sus scrofa]	gi|350593954|ref|XP_003133749.3| PREDICTED: arf-GAP domain and FG repeats-containing protein 1-like [Sus scrofa]	1	0	-0.220777	0.167649	0.686532	0.440402
gi|47523870|ref|NP_999573.1| peroxiredoxin-6 [Sus scrofa] >gi|75074817|sp|Q9TSX9.3|PRDX6_PIG RecName: Full=Peroxiredoxin-6; AltName: Full=Non-selenium glutathione peroxidase; Short=NSGPx >gi|6689393|emb|CAB65456.1| non-selenium glutathione phospholipid hydroperoxide peroxidase	gi|47523870|ref|NP_999573.1| peroxiredoxin-6 [Sus scrofa] >gi|75074817|sp|Q9TSX9.3|PRDX6_PIG RecName: Full=Peroxiredoxin-6; AltName: Full=Non-selenium glutathione peroxidase; Short=NSGPx >gi|6689393|emb|CAB65456.1| non-selenium glutathione phospholipid hydroperoxide peroxidase	1	0	0.275921	0.491619	0.409763	0.45079
gi|350589126|ref|XP_003482792.1| PREDICTED: nucleoprotein TPR [Sus scrofa]	gi|350589126|ref|XP_003482792.1| PREDICTED: nucleoprotein TPR [Sus scrofa]	1	0	0.349206	0.147807	0.466489	0.45925
gi|350581743|ref|XP_003481100.1| PREDICTED: phosphomannomutase 2-like, partial [Sus scrofa]	gi|350581743|ref|XP_003481100.1| PREDICTED: phosphomannomutase 2-like, partial [Sus scrofa]	1	0	0.02363	-0.074697	0.10218	0.460634
gi|335283574|ref|XP_003354345.1| PREDICTED: transcriptional activator protein Pur-alpha isoform 2 [Sus scrofa] >gi|335283572|ref|XP_003354344.1| PREDICTED: transcriptional activator protein Pur-alpha isoform 1 [Sus scrofa]	gi|335283574|ref|XP_003354345.1| PREDICTED: transcriptional activator protein Pur-alpha isoform 2 [Sus scrofa] >gi|335283572|ref|XP_003354344.1| PREDICTED: transcriptional activator protein Pur-alpha isoform 1 [Sus scrofa]	1	0	0.615368	0.115832	0.258161	0.492979
gi|343488534|ref|NP_001230423.1| homeobox prox 1 [Sus scrofa]	gi|343488534|ref|NP_001230423.1| homeobox prox 1 [Sus scrofa]	1	0	0.556886	0.368484	0.429664	0.518261
gi|389618965|gb|AFK92990.1| U2 small nuclear RNA auxiliary factor 2 [Sus scrofa]	gi|389618965|gb|AFK92990.1| U2 small nuclear RNA auxiliary factor 2 [Sus scrofa]	1	0	0.60168	0.387023	0.350563	0.528962
gi|351738777|gb|AEQ61487.1| ribokinase [Sus scrofa]	gi|351738777|gb|AEQ61487.1| ribokinase [Sus scrofa]	1	0	0.175284	0.614569	0.807684	0.541359
gi|194036902|ref|XP_001927358.1| PREDICTED: prefoldin subunit 2-like [Sus scrofa]	gi|194036902|ref|XP_001927358.1| PREDICTED: prefoldin subunit 2-like [Sus scrofa]	1	0	0.454318	0.206756	0.06826	0.55056
gi|350583523|ref|XP_003481536.1| PREDICTED: putative helicase MOV-10 [Sus scrofa]	gi|350583523|ref|XP_003481536.1| PREDICTED: putative helicase MOV-10 [Sus scrofa]	1	0	0.692529	-0.370602	-0.433849	0.565228
gi|311247991|ref|XP_003122917.1| PREDICTED: pyruvate dehydrogenase protein X component-like isoform 1 [Sus scrofa]	gi|311247991|ref|XP_003122917.1| PREDICTED: pyruvate dehydrogenase protein X component-like isoform 1 [Sus scrofa]	1	0	0.072486	0.016426	0.272639	0.592286
gi|311276634|ref|XP_003135287.1| PREDICTED: mitochondrial import inner membrane translocase subunit Tim8 A-like [Sus scrofa]	gi|311276634|ref|XP_003135287.1| PREDICTED: mitochondrial import inner membrane translocase subunit Tim8 A-like [Sus scrofa]	1	0	0.221096	0.617854	0.600006	0.594008
gi|335281560|ref|XP_003353830.1| PREDICTED: splicing factor 1 isoform 2 [Sus scrofa]	gi|335281560|ref|XP_003353830.1| PREDICTED: splicing factor 1 isoform 2 [Sus scrofa]	1	0	0.3314	0.030785	0.025838	0.595993
gi|350591926|ref|XP_003358845.2| PREDICTED: golgin subfamily B member 1 [Sus scrofa]	gi|350591926|ref|XP_003358845.2| PREDICTED: golgin subfamily B member 1 [Sus scrofa]	1	0	-0.067778	0.243151	0.365858	0.614852
gi|213021237|ref|NP_001132943.1| DNA-(apurinic or apyrimidinic site) lyase [Sus scrofa] >gi|210062866|gb|ACJ06403.1| APEX nuclease 1 [Sus scrofa]	gi|213021237|ref|NP_001132943.1| DNA-(apurinic or apyrimidinic site) lyase [Sus scrofa] >gi|210062866|gb|ACJ06403.1| APEX nuclease 1 [Sus scrofa]	1	0	0.254833	0.742842	0.048255	0.616671
gi|34391575|gb|AAN46746.1| E2 ubiquitin-conjugating enzyme UbcH5B [Sus scrofa]	gi|34391575|gb|AAN46746.1| E2 ubiquitin-conjugating enzyme UbcH5B [Sus scrofa]	1	0	0.29844	0.165737	0.038899	0.627926
gi|311258558|ref|XP_003127668.1| PREDICTED: protein DDI1 homolog 2 [Sus scrofa]	gi|311258558|ref|XP_003127668.1| PREDICTED: protein DDI1 homolog 2 [Sus scrofa]	1	0	0.096548	0.540676	-0.049028	0.629044
gi|350595677|ref|XP_003360362.2| PREDICTED: GRIP1-associated protein 1 [Sus scrofa]	gi|350595677|ref|XP_003360362.2| PREDICTED: GRIP1-associated protein 1 [Sus scrofa]	1	0	0.083444	0.312295	0.734437	0.648397
gi|116175267|ref|NP_001070690.1| U1 small nuclear ribonucleoprotein A [Sus scrofa] >gi|122131847|sp|Q06AA4.1|SNRPA_PIG RecName: Full=U1 small nuclear ribonucleoprotein A; Short=U1 snRNP A; Short=U1-A; Short=U1A >gi|115371743|gb|ABI96196.1| SNRPA [Sus scrofa]	gi|116175267|ref|NP_001070690.1| U1 small nuclear ribonucleoprotein A [Sus scrofa] >gi|122131847|sp|Q06AA4.1|SNRPA_PIG RecName: Full=U1 small nuclear ribonucleoprotein A; Short=U1 snRNP A; Short=U1-A; Short=U1A >gi|115371743|gb|ABI96196.1| SNRPA [Sus scrofa]	1	0	-0.04891	-0.109229	0.560036	0.650892
gi|350595424|ref|XP_003484107.1| PREDICTED: chromobox protein homolog 3-like isoform 2 [Sus scrofa] >gi|350595422|ref|XP_003360239.2| PREDICTED: chromobox protein homolog 3-like isoform 1 [Sus scrofa]	gi|350595424|ref|XP_003484107.1| PREDICTED: chromobox protein homolog 3-like isoform 2 [Sus scrofa] >gi|350595422|ref|XP_003360239.2| PREDICTED: chromobox protein homolog 3-like isoform 1 [Sus scrofa]	1	0	-0.19506	0.273135	0.277323	0.678705
gi|311267276|ref|XP_003131485.1| PREDICTED: keratin, type I cytoskeletal 19-like [Sus scrofa]	gi|311267276|ref|XP_003131485.1| PREDICTED: keratin, type I cytoskeletal 19-like [Sus scrofa]	1	0	0.146954	0.60224	0.67372	0.679158
gi|335310669|ref|XP_003362140.1| PREDICTED: hypothetical protein LOC100622909 [Sus scrofa]	gi|335310669|ref|XP_003362140.1| PREDICTED: hypothetical protein LOC100622909 [Sus scrofa]	1	0	0.745245	0.510416	0.346625	0.681959
gi|335288894|ref|XP_003126772.2| PREDICTED: ubiquitin-conjugating enzyme E2 N-like [Sus scrofa]	gi|335288894|ref|XP_003126772.2| PREDICTED: ubiquitin-conjugating enzyme E2 N-like [Sus scrofa]	1	0	0.516891	-0.051952	0.276374	0.684051
gi|148232463|ref|NP_001090940.1| methylmalonyl-CoA epimerase, mitochondrial [Sus scrofa] >gi|117660706|gb|ABK55633.1| MCEE [Sus scrofa]	gi|148232463|ref|NP_001090940.1| methylmalonyl-CoA epimerase, mitochondrial [Sus scrofa] >gi|117660706|gb|ABK55633.1| MCEE [Sus scrofa]	1	0	-0.017908	0.119493	0.855025	0.693836
gi|298160923|ref|NP_001177141.1| DDRGK domain-containing protein 1 [Sus scrofa]	gi|298160923|ref|NP_001177141.1| DDRGK domain-containing protein 1 [Sus scrofa]	1	0	-0.050658	-0.246595	0.279533	0.698045
gi|343887420|ref|NP_001230609.1| transcription elongation factor A protein 1 [Sus scrofa]	gi|343887420|ref|NP_001230609.1| transcription elongation factor A protein 1 [Sus scrofa]	1	0	-0.033757	0.493602	0.17037	0.710975
gi|335293186|ref|XP_003356895.1| PREDICTED: grpE protein homolog 1, mitochondrial-like isoform 1 [Sus scrofa]	gi|335293186|ref|XP_003356895.1| PREDICTED: grpE protein homolog 1, mitochondrial-like isoform 1 [Sus scrofa]	1	0	0.825728	0.428392	0.288071	0.72237
gi|47116966|sp|P61288.1|TCTP_PIG RecName: Full=Translationally-controlled tumor protein; Short=TCTP >gi|47523802|ref|NP_999538.1| translationally-controlled tumor protein [Sus scrofa] >gi|18482460|gb|AAL68965.1| translationally controlled tumor protein [Sus scrofa]	gi|47116966|sp|P61288.1|TCTP_PIG RecName: Full=Translationally-controlled tumor protein; Short=TCTP >gi|47523802|ref|NP_999538.1| translationally-controlled tumor protein [Sus scrofa] >gi|18482460|gb|AAL68965.1| translationally controlled tumor protein [Sus scrofa]	1	0	0.484152	0.490515	0.6539	0.735181
gi|356460899|ref|NP_999466.2| catalase [Sus scrofa]	gi|356460899|ref|NP_999466.2| catalase [Sus scrofa]	1	0	0.177467	0.059982	0.154723	0.738666
gi|346716298|ref|NP_001231025.1| heterogeneous nuclear ribonucleoprotein G [Sus scrofa]	gi|346716298|ref|NP_001231025.1| heterogeneous nuclear ribonucleoprotein G [Sus scrofa]	1	0	0.172781	0.791833	0.424868	0.756729
gi|350529421|ref|NP_001231942.1| mitochondrial ribosomal protein L49 [Sus scrofa]	gi|350529421|ref|NP_001231942.1| mitochondrial ribosomal protein L49 [Sus scrofa]	1	0	0.429684	0.501461	0.182303	0.75801
gi|194042314|ref|XP_001928933.1| PREDICTED: ATP-dependent RNA helicase SUPV3L1, mitochondrial [Sus scrofa]	gi|194042314|ref|XP_001928933.1| PREDICTED: ATP-dependent RNA helicase SUPV3L1, mitochondrial [Sus scrofa]	1	0	0.29577	0.610972	0.383813	0.798154
gi|311252785|ref|XP_003125258.1| PREDICTED: serine/arginine-rich splicing factor 7-like isoform 1 [Sus scrofa]	gi|311252785|ref|XP_003125258.1| PREDICTED: serine/arginine-rich splicing factor 7-like isoform 1 [Sus scrofa]	1	0	0.689071	0.101497	0.221791	0.805952
gi|350581737|ref|XP_003481098.1| PREDICTED: calcium-regulated heat stable protein 1-like [Sus scrofa]	gi|350581737|ref|XP_003481098.1| PREDICTED: calcium-regulated heat stable protein 1-like [Sus scrofa]	1	0	0.082515	0.482835	0.248329	0.814968
gi|112976|sp|P00503.3|AATC_PIG RecName: Full=Aspartate aminotransferase, cytoplasmic; AltName: Full=Glutamate oxaloacetate transaminase 1; AltName: Full=Transaminase A >gi|47522636|ref|NP_999092.1| aspartate aminotransferase, cytoplasmic [Sus scrofa] >gi|300557343|emb|CBV09643.1|	gi|112976|sp|P00503.3|AATC_PIG RecName: Full=Aspartate aminotransferase, cytoplasmic; AltName: Full=Glutamate oxaloacetate transaminase 1; AltName: Full=Transaminase A >gi|47522636|ref|NP_999092.1| aspartate aminotransferase, cytoplasmic [Sus scrofa] >gi|300557343|emb|CBV09643.1|	1	0	0.277407	0.257928	0.402236	0.828034
gi|335309994|ref|XP_003130977.2| PREDICTED: hypothetical protein LOC100522509, partial [Sus scrofa]	gi|335309994|ref|XP_003130977.2| PREDICTED: hypothetical protein LOC100522509, partial [Sus scrofa]	1	0	0.304855	-0.072345	0.389545	0.847785
gi|350593970|ref|XP_001925937.3| PREDICTED: 26S proteasome non-ATPase regulatory subunit 1 [Sus scrofa]	gi|350593970|ref|XP_001925937.3| PREDICTED: 26S proteasome non-ATPase regulatory subunit 1 [Sus scrofa]	1	0	0.170074	-0.158107	0.285368	0.872158
gi|350592272|ref|XP_003483433.1| PREDICTED: LOW QUALITY PROTEIN: PDZ and LIM domain protein 2-like [Sus scrofa]	gi|350592272|ref|XP_003483433.1| PREDICTED: LOW QUALITY PROTEIN: PDZ and LIM domain protein 2-like [Sus scrofa]	1	0	0.501936	0.447619	0.443219	0.889208
gi|335309568|ref|XP_003130716.2| PREDICTED: ubiquitin-associated protein 2-like, partial [Sus scrofa]	gi|335309568|ref|XP_003130716.2| PREDICTED: ubiquitin-associated protein 2-like, partial [Sus scrofa]	1	0	0.629488	0.539916	0.735138	0.925725
gi|350582036|ref|XP_003481179.1| PREDICTED: U5 small nuclear ribonucleoprotein 200 kDa helicase [Sus scrofa]	gi|350582036|ref|XP_003481179.1| PREDICTED: U5 small nuclear ribonucleoprotein 200 kDa helicase [Sus scrofa]	1	0	0.216636	0.261358	0.168248	0.93049
gi|350589456|ref|XP_003357762.2| PREDICTED: ubiquilin-1 [Sus scrofa]	gi|350589456|ref|XP_003357762.2| PREDICTED: ubiquilin-1 [Sus scrofa]	1	0	0.358951	0.012384	0.675199	0.935435
gi|311259466|ref|XP_003128111.1| PREDICTED: putative hydroxypyruvate isomerase-like isoform 1 [Sus scrofa]	gi|311259466|ref|XP_003128111.1| PREDICTED: putative hydroxypyruvate isomerase-like isoform 1 [Sus scrofa]	1	0	0.002344	0.206216	0.287266	0.967978
gi|350585079|ref|XP_003127070.3| PREDICTED: xaa-Pro dipeptidase [Sus scrofa]	gi|350585079|ref|XP_003127070.3| PREDICTED: xaa-Pro dipeptidase [Sus scrofa]	1	0	0.342117	0.060301	0.433973	0.98477
gi|350589336|ref|XP_003130615.3| PREDICTED: heterogeneous nuclear ribonucleoprotein U [Sus scrofa]	gi|350589336|ref|XP_003130615.3| PREDICTED: heterogeneous nuclear ribonucleoprotein U [Sus scrofa]	1	0	0.754737	0.147933	0.721439	0.99593
gi|335304027|ref|XP_003134070.2| PREDICTED: 28S ribosomal protein S36, mitochondrial-like [Sus scrofa]	gi|335304027|ref|XP_003134070.2| PREDICTED: 28S ribosomal protein S36, mitochondrial-like [Sus scrofa]	1	0	-0.1108	-0.22598	-0.041942	1.03915
gi|311258794|ref|XP_003127785.1| PREDICTED: sphingomyelin phosphodiesterase, acid-like 3B [Sus scrofa]	gi|311258794|ref|XP_003127785.1| PREDICTED: sphingomyelin phosphodiesterase, acid-like 3B [Sus scrofa]	1	0	0.736706	0.436607	0.288327	1.04345
gi|335310428|ref|XP_003362028.1| PREDICTED: surfeit locus protein 4-like, partial [Sus scrofa]	gi|335310428|ref|XP_003362028.1| PREDICTED: surfeit locus protein 4-like, partial [Sus scrofa]	1	0	0.775393	-0.994111	-0.492821	1.05357
gi|343790970|ref|NP_001230536.1| translin-associated protein X [Sus scrofa]	gi|343790970|ref|NP_001230536.1| translin-associated protein X [Sus scrofa]	1	0	0.433309	0.2151	0.580555	1.13321
gi|350593039|ref|XP_001929313.3| PREDICTED: cytosolic purine 5~-nucleotidase isoform 1 [Sus scrofa]	gi|350593039|ref|XP_001929313.3| PREDICTED: cytosolic purine 5~-nucleotidase isoform 1 [Sus scrofa]	1	0	0.727617	0.186608	0.693254	1.23246
gi|311248892|ref|XP_003123362.1| PREDICTED: lysosomal alpha-mannosidase-like isoform 1 [Sus scrofa]	gi|311248892|ref|XP_003123362.1| PREDICTED: lysosomal alpha-mannosidase-like isoform 1 [Sus scrofa]	1	0	0.859585	0.250375	0.906891	1.25038
gi|178056464|ref|NP_001116693.1| beta-hexosaminidase subunit alpha precursor [Sus scrofa] >gi|169117926|gb|ACA43012.1| hexosaminidase A alpha polypeptide [Sus scrofa]	gi|178056464|ref|NP_001116693.1| beta-hexosaminidase subunit alpha precursor [Sus scrofa] >gi|169117926|gb|ACA43012.1| hexosaminidase A alpha polypeptide [Sus scrofa]	1	0	0.840877	0.410465	0.615082	1.28493
gi|350594464|ref|XP_003483904.1| PREDICTED: LOW QUALITY PROTEIN: clathrin interactor 1 [Sus scrofa]	gi|350594464|ref|XP_003483904.1| PREDICTED: LOW QUALITY PROTEIN: clathrin interactor 1 [Sus scrofa]	1	0	0.553541	0.211123	0.484828	1.39963

## Sheet: bin 4
Gene	GWEIGHT	114	115	116	117	118
EWEIGHT		1	1	1	1	1
gi|311245810|ref|XP_001924714.2| PREDICTED: GTP:AMP phosphotransferase, mitochondrial isoform 1 [Sus scrofa]	1	0	-0.102837	-0.503078	-1.29336	-2.45482
gi|229626|prf||770504A hemoglobin alpha	1	0	0.365169	-0.017666	-1.60559	-2.36048
gi|343403779|ref|NP_001230274.1| ribosomal protein L13 [Sus scrofa]	1	0	0.094834	-0.841935	-1.0097	-2.10151
gi|262072813|dbj|BAI47714.1| hydroxysteroid (17-beta) dehydrogenase 12 [Sus scrofa]	1	0	-0.157659	-1.26222	-1.09664	-2.03705
gi|350591034|ref|XP_003483187.1| PREDICTED: glycerol-3-phosphate dehydrogenase 1-like protein-like [Sus scrofa]	1	0	0.250515	-1.28405	-1.02381	-1.97851
gi|75074354|sp|Q9GL51.3|LIS1_PIG RecName: Full=Platelet-activating factor acetylhydrolase IB subunit alpha; AltName: Full=Lissencephaly-1 protein; Short=LIS-1; AltName: Full=PAF acetylhydrolase 45 kDa subunit; Short=PAF-AH 45 kDa subunit; AltName: Full=PAF-AH alpha; Short=PAFAH alp	1	0	-0.385594	-0.827323	-0.92278	-1.91809
gi|48675953|ref|NP_001001643.1| rab GDP dissociation inhibitor beta [Sus scrofa] >gi|75043802|sp|Q6Q7J2.1|GDIB_PIG RecName: Full=Rab GDP dissociation inhibitor beta; Short=Rab GDI beta; AltName: Full=Guanosine diphosphate dissociation inhibitor 2; Short=GDI-2 >gi|45758488|gb|AAS76	1	0	0.238787	-0.641354	-1.0357	-1.8365
gi|135435|sp|P02550.1|TBA1A_PIG RecName: Full=Tubulin alpha-1A chain; AltName: Full=Alpha-tubulin 1; AltName: Full=Tubulin alpha-1 chain >gi|118137996|pdb|2HXF|A Chain A, Kif1a Head-Microtubule Complex Structure In Amppnp-Form >gi|118137999|pdb|2HXH|A Chain A, Kif1a Head-Microtubu	1	0	1.10677	-0.254997	-1.12041	-1.8256
gi|350597119|ref|XP_003484358.1| PREDICTED: alpha-N-acetylgalactosaminidase-like [Sus scrofa]	1	0	-0.448033	-0.426659	-1.15657	-1.81368
gi|311277261|ref|XP_003135572.1| PREDICTED: 55 kDa erythrocyte membrane protein-like isoform 1 [Sus scrofa]	1	0	-0.329749	-0.958641	-0.632537	-1.76338
gi|47523768|ref|NP_999520.1| epoxide hydrolase 1 precursor [Sus scrofa] >gi|75069447|sp|P79381.1|HYEP_PIG RecName: Full=Epoxide hydrolase 1; AltName: Full=Epoxide hydratase; AltName: Full=Microsomal epoxide hydrolase >gi|1840391|dbj|BAA19200.1| epoxide hydrolase [Sus scrofa]	1	0	0.156697	-1.12366	-1.04678	-1.75636
gi|1170740|sp|P00339.3|LDHA_PIG RecName: Full=L-lactate dehydrogenase A chain; Short=LDH-A; AltName: Full=LDH muscle subunit; Short=LDH-M >gi|473571|gb|AAA50436.1| lactate dehydrogenase-A [Sus scrofa domesticus]	1	0	-0.114225	-0.945552	-1.02331	-1.74237
gi|47523086|ref|NP_999309.1| peroxiredoxin-5, mitochondrial [Sus scrofa] >gi|10305336|gb|AAG13452.2|AF110735_1 peroxiredoxin 5 [Sus scrofa]	1	0	0.231131	-0.584086	-1.30971	-1.73055
gi|340007402|ref|NP_001229989.1| RAB10, member RAS oncogene family [Sus scrofa]	1	0	0.585383	-1.32529	-0.836111	-1.70223
gi|311258000|ref|XP_003127386.1| PREDICTED: AP-2 complex subunit alpha-1 isoform 1 [Sus scrofa]	1	0	-0.095879	-0.695262	-0.739409	-1.68345
gi|350538593|ref|NP_001233247.1| phosphoglucomutase-1 [Sus scrofa] >gi|321574209|gb|ADW94631.1| phosphoglucomutase 1 [Sus scrofa]	1	0	0.182932	-1.33417	-1.15105	-1.65249
gi|350539577|ref|NP_001233167.1| coatomer subunit gamma-2 [Sus scrofa] >gi|301087607|gb|ADK56184.1| coatomer protein complex subunit gamma 2 [Sus scrofa]	1	0	-0.334681	-1.14856	-0.881084	-1.626
gi|148226851|ref|NP_001090933.1| ATP synthase subunit f, mitochondrial [Sus scrofa] >gi|117660512|gb|ABK55624.1| mitochondrial Atp5j2 [Sus scrofa]	1	0	1.25748	-0.985157	-0.957676	-1.55631
gi|311251336|ref|XP_003124563.1| PREDICTED: elongation factor Tu, mitochondrial-like [Sus scrofa]	1	0	-0.319602	-0.849195	-0.992702	-1.54172
gi|238018148|ref|NP_001153899.1| ADP-ribosylation factor 1 [Sus scrofa] >gi|212725657|gb|ACJ38117.1| ADP-ribosylation factor 1 [Sus scrofa] >gi|237638742|gb|ACR07973.1| ADP-ribosylation factor 1 [Sus scrofa]	1	0	0.116798	-0.66213	-0.271648	-1.53434
gi|164543|gb|AAA31072.1| malate dehydrogenase (EC 1.1.1.37), partial [Sus scrofa]	1	0	0.653184	-1.00163	-0.669002	-1.52997
gi|47523672|ref|NP_999468.1| 2~-5~-oligoadenylate synthase 1 [Sus scrofa] >gi|6226834|sp|Q29599.3|OAS1_PIG RecName: Full=2~-5~-oligoadenylate synthase 1; Short=(2-5~)oligo(A) synthase 1; Short=2-5A synthase 1; AltName: Full=p42 OAS >gi|3451331|emb|CAA12397.1| 2~-5~ oligoadenyla	1	0	-0.410069	-0.735071	-0.602849	-1.50072
gi|347300243|ref|NP_001231430.1| glutamate dehydrogenase 1, mitochondrial [Sus scrofa]	1	0	-0.266484	-0.393664	-0.545667	-1.48715
gi|350584800|ref|XP_003355778.2| PREDICTED: cytochrome c oxidase subunit 4 isoform 1, mitochondrial-like [Sus scrofa]	1	0	-0.538939	-0.68372	-0.85622	-1.48236
gi|264681430|ref|NP_001161110.1| 3-ketoacyl-CoA thiolase, mitochondrial [Sus scrofa] >gi|262036903|dbj|BAI47587.1| acetyl-Coenzyme A acyltransferase 2 [Sus scrofa]	1	0	0.057355	-1.14589	-1.14589	-1.46782
gi|222090420|gb|ACM42418.1| carnitine palmitoyltransferase II [Sus scrofa]	1	0	0.472382	-0.409996	-0.754467	-1.46703
gi|335290197|ref|XP_003356098.1| PREDICTED: LOW QUALITY PROTEIN: 40S ribosomal protein S9-like, partial [Sus scrofa]	1	0	-0.591264	-0.454499	-0.583167	-1.44958
gi|350582773|ref|XP_003481353.1| PREDICTED: 40S ribosomal protein S7-like isoform 2 [Sus scrofa] >gi|350582771|ref|XP_003481352.1| PREDICTED: 40S ribosomal protein S7-like isoform 1 [Sus scrofa]	1	0	-0.413952	-0.529068	-0.73588	-1.44243
gi|219521964|ref|NP_001137170.1| long-chain-fatty-acid--CoA ligase 3 [Sus scrofa] >gi|217314893|gb|ACK36981.1| acyl-CoA synthetase long-chain family member 3 [Sus scrofa]	1	0	-0.234023	-1.01131	-0.764784	-1.43014
gi|47523618|ref|NP_999441.1| citrate synthase, mitochondrial precursor [Sus scrofa] >gi|116470|sp|P00889.2|CISY_PIG RecName: Full=Citrate synthase, mitochondrial; Flags: Precursor >gi|164419|gb|AAA31017.1| citrate synthase precursor (EC 4.1.3.7) [Sus scrofa]	1	0	-0.006747	-0.473807	-0.777928	-1.42178
gi|47522916|ref|NP_999215.1| glutathione S-transferase omega-1 [Sus scrofa] >gi|20141290|sp|Q9N1F5.2|GSTO1_PIG RecName: Full=Glutathione S-transferase omega-1; Short=GSTO-1; AltName: Full=Glutathione S-transferase omega 1-1; Short=GSTO 1-1; AltName: Full=Glutathione-dependent d	1	0	-0.388411	-0.410801	-0.721141	-1.42071
gi|311268489|ref|XP_003132080.1| PREDICTED: fatty aldehyde dehydrogenase-like [Sus scrofa]	1	0	0.108354	-0.369304	-0.691232	-1.42009
gi|350582213|ref|XP_003481224.1| PREDICTED: 60S ribosomal protein L7a-like [Sus scrofa] >gi|350582215|ref|XP_003481225.1| PREDICTED: 60S ribosomal protein L7a-like [Sus scrofa] >gi|335285208|ref|XP_003125024.2| PREDICTED: 60S ribosomal protein L7a-like isoform 1 [Sus scrofa]	1	0	-0.47307	-0.012464	-1.0156	-1.40988
gi|350587405|ref|XP_003482406.1| PREDICTED: cytosolic beta-glucosidase-like, partial [Sus scrofa]	1	0	-0.213664	-1.0763	-0.786052	-1.40567
gi|346716335|ref|NP_001231184.1| lysosome-associated membrane glycoprotein 2 isoform 1 precursor [Sus scrofa]	1	0	-0.217152	-0.783921	-0.715082	-1.39626
gi|72535188|ref|NP_001026956.1| GTP-binding protein SAR1a [Sus scrofa] >gi|75060235|sp|Q52NJ3.1|SAR1A_PIG RecName: Full=GTP-binding protein SAR1a >gi|62868640|gb|AAY17508.1| GTP-binding protein SAR1a [Sus scrofa]	1	0	-0.129394	-0.706641	-0.765535	-1.38241
gi|194041608|ref|XP_001928080.1| PREDICTED: mitotic checkpoint protein BUB3 isoform 2 [Sus scrofa]	1	0	-0.584963	-0.340848	-0.373555	-1.34625
gi|85792253|gb|ABC84194.1| eukaryotic translation initiation factor 4A isoform 2 [Sus scrofa]	1	0	-0.212758	-0.552663	-0.875487	-1.33912
gi|194041937|ref|XP_001928912.1| PREDICTED: alpha-centractin [Sus scrofa]	1	0	0.269291	-0.886789	-0.249359	-1.33755
gi|347300325|ref|NP_001231461.1| dehydrogenase/reductase SDR family member 11 [Sus scrofa]	1	0	0.247965	-0.602061	-0.888942	-1.33045
gi|346421380|ref|NP_001231062.1| ATP-binding cassette sub-family D member 3 [Sus scrofa]	1	0	0.313121	-0.689318	-0.674745	-1.32648
gi|114326183|ref|NP_001041537.1| ADP-ribosylation factor 4 [Sus scrofa] >gi|221327932|gb|ACM17702.1| ADP-ribosylation factor 4 [Sus scrofa] >gi|203283175|gb|ACH96700.1| ADP-ribosylation factor 4 [Sus scrofa] >gi|62208269|gb|AAX77012.1| ADP-ribosylation factor family-like protein [S	1	0	0.21675	-0.893648	-0.655647	-1.31603
gi|311277187|ref|XP_003135530.1| PREDICTED: translocon-associated protein subunit delta-like isoform 1 [Sus scrofa]	1	0	0.036069	0.02115	-1	-1.31131
gi|347300323|ref|NP_001231460.1| thioredoxin-dependent peroxide reductase, mitochondrial [Sus scrofa]	1	0	-0.970722	-0.123441	-0.783724	-1.31047
gi|335284397|ref|XP_003354597.1| PREDICTED: major vault protein isoform 1 [Sus scrofa]	1	0	-0.273357	-0.646481	-0.640139	-1.30645
gi|740987|prf||2006263A Arg Gly amidinotransferase	1	0	-0.056095	-1.42321	-1.55173	-1.29768
gi|350583690|ref|XP_003125999.3| PREDICTED: tetratricopeptide repeat protein 38-like [Sus scrofa]	1	0	0.046671	-0.862181	-0.718192	-1.29272
gi|350591495|ref|XP_003132454.3| PREDICTED: coatomer subunit gamma [Sus scrofa]	1	0	0.020483	-0.840042	-0.420089	-1.28326
gi|417185|sp|P80229.1|ILEU_PIG RecName: Full=Leukocyte elastase inhibitor; Short=LEI; AltName: Full=Leukocyte neutral proteinase inhibitor; Short=LNPI; AltName: Full=Serpin B1	1	0	-0.025251	-0.771121	-0.873711	-1.2832
gi|47522710|ref|NP_999050.1| mannosyl-oligosaccharide 1,2-alpha-mannosidase IA [Sus scrofa] >gi|41017248|sp|O02773.1|MA1A1_PIG RecName: Full=Mannosyl-oligosaccharide 1,2-alpha-mannosidase IA; AltName: Full=Man(9)-alpha-mannosidase; Short=Man9-mannosidase; AltName: Full=Mannosid	1	0	0.240062	-0.601186	-0.489119	-1.28252
gi|46396062|sp|Q865F1.1|MTP_PIG RecName: Full=Microsomal triglyceride transfer protein large subunit; Flags: Precursor >gi|47523450|ref|NP_999350.1| microsomal triglyceride transfer protein large subunit precursor [Sus scrofa] >gi|28974486|gb|AAO61497.1| microsomal triglyceride tr	1	0	0.182711	-0.706607	-0.692701	-1.27766
gi|350588020|ref|XP_003357153.2| PREDICTED: protein transport protein Sec31A [Sus scrofa]	1	0	0.162713	-0.760778	-0.372903	-1.2721
gi|347300163|ref|NP_001231396.1| succinate-semialdehyde dehydrogenase, mitochondrial [Sus scrofa]	1	0	0.203656	-1	-0.201983	-1.24822
gi|311264036|ref|XP_003129968.1| PREDICTED: 40S ribosomal protein S25-like isoform 2 [Sus scrofa] >gi|311264034|ref|XP_003129967.1| PREDICTED: 40S ribosomal protein S25-like isoform 1 [Sus scrofa]	1	0	-0.250088	-0.332124	-1.29675	-1.24767
gi|66793461|ref|NP_001019759.1| UDP-N-acetylglucosamine transporter [Sus scrofa] >gi|62868648|gb|AAY17512.1| UDP-N-acetylglucosamine transporter [Sus scrofa]	1	0	-0.768184	-1.24114	-0.472543	-1.24462
gi|48675943|ref|NP_001001640.1| amine oxidase [flavin-containing] A [Sus scrofa] >gi|62899648|sp|Q6Q2J0.1|AOFA_PIG RecName: Full=Amine oxidase [flavin-containing] A; AltName: Full=Monoamine oxidase type A; Short=MAO-A >gi|45551418|gb|AAS68020.1| monoamine oxidase A [Sus scrofa]	1	0	-0.18819	-0.557784	-0.338057	-1.24308
gi|298160993|ref|NP_001177169.1| glycerol-3-phosphate dehydrogenase [NAD+], cytoplasmic [Sus scrofa]	1	0	0.618182	-0.711126	-0.870419	-1.23754
gi|350593534|ref|XP_003483707.1| PREDICTED: grancalcin-like [Sus scrofa]	1	0	0.012023	-0.797579	-0.80811	-1.22844
gi|321400096|ref|NP_001189469.1| transmembrane emp24 domain-containing protein 7 precursor [Sus scrofa]	1	0	-0.277478	-0.396123	-0.847997	-1.22485
gi|298160936|ref|NP_001177146.1| transmembrane protein C9orf46 [Sus scrofa]	1	0	-0.318055	-0.11962	-0.620296	-1.21003
gi|12231040|sp|Q29048.2|VATA_PIG RecName: Full=V-type proton ATPase catalytic subunit A; Short=V-ATPase subunit A; AltName: Full=V-ATPase 69 kDa subunit; AltName: Full=Vacuolar proton pump subunit alpha	1	0	-0.488286	-0.479724	-0.494023	-1.18016
gi|72535208|ref|NP_001026966.1| 2~-5~-oligoadenylate synthase 2 [Sus scrofa] >gi|45594389|gb|AAQ22351.1| 2~-5~ oligoadenylate synthetase 2 [Sus scrofa]	1	0	-0.920303	-0.475518	-0.662505	-1.175
gi|350591601|ref|XP_003132498.3| PREDICTED: sodium/potassium-transporting ATPase subunit beta-3-like [Sus scrofa]	1	0	-0.682573	-0.934112	-0.741467	-1.16656
gi|335287882|ref|XP_003126232.2| PREDICTED: LOW QUALITY PROTEIN: sterol O-acyltransferase 2-like [Sus scrofa]	1	0	-0.196723	-0.999081	-0.787493	-1.16442
gi|335310107|ref|XP_003361890.1| PREDICTED: non-POU domain-containing octamer-binding protein [Sus scrofa]	1	0	-0.318504	-0.672597	-0.616854	-1.15628
gi|311259452|ref|XP_003128108.1| PREDICTED: 40S ribosomal protein S8-like [Sus scrofa]	1	0	-0.889078	-0.504473	-0.452979	-1.1461
gi|335285948|ref|XP_003131991.2| PREDICTED: very long-chain specific acyl-CoA dehydrogenase, mitochondrial-like isoform 1 [Sus scrofa]	1	0	-0.336079	-0.594076	-0.632995	-1.14515
gi|343790912|ref|NP_001230514.1| ras-related C3 botulinum toxin substrate 1 (rho family, small GTP binding protein Rac1) [Sus scrofa]	1	0	0.179725	-0.330443	-1.12909	-1.13812
gi|350593062|ref|XP_003133228.3| PREDICTED: xaa-Pro aminopeptidase 1 isoform 2 [Sus scrofa]	1	0	0.461904	-0.898198	-0.854476	-1.13173
gi|164382|gb|AAA31002.1| Na+, K+-ATPase alpha-subunit precursor [Sus scrofa]	1	0	0.022184	-0.501011	-0.638092	-1.1277
gi|350582501|ref|XP_003481284.1| PREDICTED: atlastin-2-like isoform 2 [Sus scrofa]	1	0	0.043677	-0.53842	-0.953457	-1.12661
gi|113205854|ref|NP_001038066.1| 40S ribosomal protein S3 [Sus scrofa] >gi|115502828|sp|Q0Z8U2.1|RS3_PIG RecName: Full=40S ribosomal protein S3 >gi|110006645|gb|ABG48767.1| ribosomal protein S3 [Sus scrofa]	1	0	0.218328	-0.797599	-0.663861	-1.12253
gi|148747594|ref|NP_001092068.1| 60S acidic ribosomal protein P0 [Sus scrofa] >gi|182705234|sp|Q29214.2|RLA0_PIG RecName: Full=60S acidic ribosomal protein P0; AltName: Full=60S ribosomal protein L10E >gi|83854099|gb|ABC47963.1| ribosomal phosphoprotein large PO subunit [Sus scrofa	1	0	-0.299453	-1.05541	-0.847997	-1.11455
gi|194035831|ref|XP_001928742.1| PREDICTED: coatomer subunit alpha isoform 2 [Sus scrofa]	1	0	0.01524	-0.494649	-0.54965	-1.1142
gi|311260951|ref|XP_003128591.1| PREDICTED: dehydrogenase/reductase SDR family member 1-like [Sus scrofa]	1	0	-0.361005	-0.687969	-0.577545	-1.11313
gi|60394813|sp|Q29201.4|RS16_PIG RecName: Full=40S ribosomal protein S16 >gi|212549659|ref|NP_001131092.1| 40S ribosomal protein S16 [Sus scrofa] >gi|335289675|ref|XP_003355953.1| PREDICTED: 40S ribosomal protein S16-like isoform 2 [Sus scrofa] >gi|335289677|ref|XP_003355954.1| PRE	1	0	0.32646	-0.38192	-0.896795	-1.11116
gi|3288991|gb|AAC25597.1| fructose-1,6-bisphosphatase [Sus scrofa]	1	0	-0.435796	-0.610958	-0.667122	-1.09586
gi|350593858|ref|XP_003133682.3| PREDICTED: carbamoyl-phosphate synthase [ammonia], mitochondrial isoform 1 [Sus scrofa]	1	0	0.115071	-0.709053	-0.735205	-1.09276
gi|335282386|ref|XP_003354050.1| PREDICTED: elongation factor 2 [Sus scrofa]	1	0	0.038514	-0.544258	-0.679574	-1.08502
gi|120968|sp|P80147.2|GABT_PIG RecName: Full=4-aminobutyrate aminotransferase, mitochondrial; AltName: Full=(S)-3-amino-2-methylpropionate transaminase; AltName: Full=GABA aminotransferase; Short=GABA-AT; AltName: Full=Gamma-amino-N-butyrate transaminase; Short=GABA transaminase;	1	0	0.236387	-0.502757	-0.791295	-1.08228
gi|346421435|ref|NP_001231091.1| sorbitol dehydrogenase [Sus scrofa]	1	0	-0.377808	-1.05686	-1.10612	-1.07272
gi|350589164|ref|XP_003357646.2| PREDICTED: acyl-CoA:lysophosphatidylglycerol acyltransferase 1-like [Sus scrofa]	1	0	0.027879	-0.875349	-0.460312	-1.06845
gi|349732262|ref|NP_001231870.1| 3-hydroxyanthranilate 3,4-dioxygenase [Sus scrofa]	1	0	0.064359	-0.468675	-0.714328	-1.04275
gi|311272935|ref|XP_003133651.1| PREDICTED: NADH-ubiquinone oxidoreductase 75 kDa subunit, mitochondrial isoform 1 [Sus scrofa]	1	0	-0.342281	-0.711624	-0.678072	-1.04206
gi|330417958|ref|NP_001155225.1| phosphoenolpyruvate carboxykinase [GTP], mitochondrial [Sus scrofa] >gi|238863892|gb|ACR66222.1| phosphoenolpyruvate carboxykinase 2 [Sus scrofa]	1	0	0.279499	-0.989688	-0.511324	-1.03987
gi|89573899|gb|ABD77175.1| ribosomal protein L18 [Sus scrofa]	1	0	-0.311025	-0.588774	-0.67427	-1.02302
gi|194038734|ref|XP_001929226.1| PREDICTED: protein transport protein Sec23A isoform 2 [Sus scrofa]	1	0	0.026742	-0.833227	-0.536525	-1.01492
gi|116175263|ref|NP_001070687.1| ubiquitin-conjugating enzyme E2 J1 [Sus scrofa] >gi|115371729|gb|ABI96189.1| UB2J1 [Sus scrofa]	1	0	-0.58955	-0.591849	-0.929974	-1.01073
gi|47522750|ref|NP_999125.1| voltage-dependent anion-selective channel protein 1 [Sus scrofa] >gi|75050406|sp|Q9MZ16.3|VDAC1_PIG RecName: Full=Voltage-dependent anion-selective channel protein 1; Short=VDAC-1 >gi|8745552|gb|AAF78963.1|AF268461_1 voltage-dependent anion channel	1	0	-0.179882	-0.485772	-0.515066	-1.01039
gi|350581964|ref|XP_003124841.3| PREDICTED: constitutive coactivator of PPAR-gamma-like protein 1, partial [Sus scrofa]	1	0	0.119676	-1.26536	-0.549783	-0.972113
gi|346716265|ref|NP_001231271.1| omega-amidase NIT2 [Sus scrofa]	1	0	-0.171879	-0.352011	-0.839433	-0.944468
gi|40889737|pdb|1UDY|D Chain D, Medium-Chain Acyl-Coa Dehydrogenase With 3-Thiaoctanoyl-Coa >gi|40889735|pdb|1UDY|B Chain B, Medium-Chain Acyl-Coa Dehydrogenase With 3-Thiaoctanoyl-Coa >gi|40889736|pdb|1UDY|C Chain C, Medium-Chain Acyl-Coa Dehydrogenase With 3-Thiaoctanoy	1	0	-0.333593	-0.704935	-0.771886	-0.923889
gi|311270046|ref|XP_003132745.1| PREDICTED: 60S ribosomal protein L24-like isoform 1 [Sus scrofa]	1	0	-0.413246	-0.327047	-0.933766	-0.923527
gi|311252952|ref|XP_003125350.1| PREDICTED: ketohexokinase-like isoform 3 [Sus scrofa]	1	0	-0.239322	-0.828673	-0.47389	-0.882411
gi|350591605|ref|XP_003483304.1| PREDICTED: plastin-1-like [Sus scrofa]	1	0	-0.226158	-0.725729	-0.776355	-0.878653
gi|311268663|ref|XP_003132151.1| PREDICTED: 3-ketoacyl-CoA thiolase A, peroxisomal isoform 1 [Sus scrofa]	1	0	0.174953	-0.784098	-0.723482	-0.864345
gi|2497487|sp|Q29561.1|KCY_PIG RecName: Full=UMP-CMP kinase; AltName: Full=Cytidine monophosphate kinase; AltName: Full=Cytidylate kinase; AltName: Full=Deoxycytidylate kinase; AltName: Full=Uridine monophosphate kinase; AltName: Full=Uridine monophosphate/cytidine monophosphate	1	0	-0.377441	-0.527212	-1.0435	-0.853005
gi|335308509|ref|XP_003361258.1| PREDICTED: microsomal glutathione S-transferase 2-like, partial [Sus scrofa]	1	0	-0.275738	-0.669402	-0.756865	-0.834033
gi|350587855|ref|XP_003129278.3| PREDICTED: protein transport protein Sec24D [Sus scrofa]	1	0	-0.322661	-1.25466	-0.664268	-0.826281
gi|194044992|ref|XP_001928105.1| PREDICTED: sorting nexin-12 [Sus scrofa]	1	0	-0.163657	-0.671475	-0.729492	-0.796815
gi|335294978|ref|XP_003357366.1| PREDICTED: coatomer subunit delta isoform 1 [Sus scrofa]	1	0	-0.043903	-0.658549	-0.781544	-0.721975
gi|311245810|ref|XP_001924714.2|	PREDICTED: GTP:AMP phosphotransferase, mitochondrial isoform 1 [Sus scrofa]|311245810|ref|XP_001924714.2|	GO:0005758	GO:0046939	GO:0010243	GO:0005759	GO:0006756	GO:0006172	GO:0046899	GO:0007517	GO:0005525	GO:0007596	GO:0014070	GO:0042802	GO:0046041	GO:0021549	GO:0042594	GO:0046060	GO:0046051	GO:0046039	GO:0051260	GO:0001889	GO:0021772	GO:0005524	GO:0004017
gi|229626|prf||770504A	hemoglobin alpha|229626|prf||770504A	GO:0015671	GO:0000015	GO:0005344	GO:0005833	GO:0005506	GO:0005515	GO:0004634	GO:0020037	GO:0000287	GO:0006096	GO:0019825
gi|343403779|ref|NP_001230274.1|	ribosomal protein L13 [Sus scrofa]|343403779|ref|NP_001230274.1|	GO:0006413	GO:0019083	GO:0003723	GO:0003735	GO:0006414	GO:0005515	GO:0006415	GO:0006614	GO:0022625	GO:0000184
gi|262072813|dbj|BAI47714.1|	hydroxysteroid (17-beta) dehydrogenase 12 [Sus scrofa]|262072813|dbj|BAI47714.1|	GO:0001968	GO:0035338	GO:0006633	GO:0055114	GO:0016021	GO:0006703	GO:0010811	GO:0005518	GO:0019432	GO:0004303	GO:0000166	GO:0031012	GO:0008201	GO:0005789	GO:0030198
gi|350591034|ref|XP_003483187.1|	PREDICTED: glycerol-3-phosphate dehydrogenase 1-like protein-like [Sus scrofa]|350591034|ref|XP_003483187.1|	GO:0005829	GO:0051287	GO:0055114	GO:0009331	GO:0006734	GO:0004367	GO:0005975	GO:0046168	GO:0019432	GO:0006654	GO:0042803
gi|75074354|sp|Q9GL51.3|LIS1_PIG	RecName: Full=Platelet-activating factor acetylhydrolase IB subunit alpha; AltName: Full=Lissencephaly-1 protein; Short=LIS-1; AltName: Full=PAF acetylhydrolase 45 kDa subunit; Short=PAF-AH 45 kDa subunit; AltName: Full=PAF-AH alpha; Short=PAFAH alp|75074354|sp|Q9GL51.3|LIS1_PIG	GO:0000235	GO:0031512	GO:0021766	GO:0042803	GO:0046329	GO:0008090	GO:0000236	GO:0050885	GO:0033267	GO:0000132	GO:0016042	GO:0031982	GO:0030426	GO:0031252	GO:0008201	GO:0007268	GO:0007405	GO:0010977	GO:0005829	GO:0000776	GO:0001667	GO:0051081	GO:0047179	GO:0007611	GO:0021540	GO:0031513	GO:0021819	GO:0034452	GO:0045505	GO:0048471	GO:0032403	GO:0008344	GO:0001675	GO:0016787	GO:0046469	GO:0005871	GO:0045931	GO:0043274	GO:0051219	GO:0047496	GO:0031965	GO:0021895	GO:0036035	GO:0001961	GO:0007097	GO:0030036	GO:0000086	GO:0048854
gi|48675953|ref|NP_001001643.1|	rab GDP dissociation inhibitor beta [Sus scrofa] >gi|75043802|sp|Q6Q7J2.1|GDIB_PIG RecName: Full=Rab GDP dissociation inhibitor beta; Short=Rab GDI beta; AltName: Full=Guanosine diphosphate dissociation inhibitor 2; Short=GDI-2 >gi|45758488|gb|AAS76|48675953|ref|NP_001001643.1|	GO:0016192	GO:0005097	GO:0005829	GO:0009986	GO:0043547	GO:0051056	GO:0031267	GO:0005093	GO:0015031	GO:0016020	GO:0005794
gi|135435|sp|P02550.1|TBA1A_PIG	RecName: Full=Tubulin alpha-1A chain; AltName: Full=Alpha-tubulin 1; AltName: Full=Tubulin alpha-1 chain >gi|118137996|pdb|2HXF|A Chain A, Kif1a Head-Microtubule Complex Structure In Amppnp-Form >gi|118137999|pdb|2HXH|A Chain A, Kif1a Head-Microtubu|135435|sp|P02550.1|TBA1A_PIG	GO:0000226	GO:0030705	GO:0005525	GO:0051301	GO:0016021	GO:0006184	GO:0005881	GO:0005829	GO:0046982	GO:0019904	GO:0051258	GO:0042626	GO:0055085	GO:0003924	GO:0006200	GO:0007018	GO:0051084	GO:0005524	GO:0000086	GO:0005200
gi|350597119|ref|XP_003484358.1|	PREDICTED: alpha-N-acetylgalactosaminidase-like [Sus scrofa]|350597119|ref|XP_003484358.1|	GO:0043169	GO:0008456	GO:0004557	GO:0016052	GO:0046477	GO:0005764	GO:0009311	GO:0042803	GO:0016139
gi|311277261|ref|XP_003135572.1|	PREDICTED: 55 kDa erythrocyte membrane protein-like isoform 1 [Sus scrofa]|311277261|ref|XP_003135572.1|	GO:0030863	GO:0032420	GO:0004385	GO:0090022	GO:0005515	GO:0007165	GO:0005887
gi|47523768|ref|NP_999520.1|	epoxide hydrolase 1 precursor [Sus scrofa] >gi|75069447|sp|P79381.1|HYEP_PIG RecName: Full=Epoxide hydrolase 1; AltName: Full=Epoxide hydratase; AltName: Full=Microsomal epoxide hydrolase >gi|1840391|dbj|BAA19200.1| epoxide hydrolase [Sus scrofa]|47523768|ref|NP_999520.1|	GO:0016021	GO:0019439	GO:0006805	GO:0001889	GO:0009636	GO:0071385	GO:0019899	GO:0014070	GO:0004301	GO:0005789	GO:0033961
gi|1170740|sp|P00339.3|LDHA_PIG	RecName: Full=L-lactate dehydrogenase A chain; Short=LDH-A; AltName: Full=LDH muscle subunit; Short=LDH-M >gi|473571|gb|AAA50436.1| lactate dehydrogenase-A [Sus scrofa domesticus]|1170740|sp|P00339.3|LDHA_PIG	GO:0031668	GO:0044262	GO:0019861	GO:0004459	GO:0006096	GO:0005829	GO:0005739	GO:0000166	GO:0055114
gi|47523086|ref|NP_999309.1|	peroxiredoxin-5, mitochondrial [Sus scrofa] >gi|10305336|gb|AAG13452.2|AF110735_1 peroxiredoxin 5 [Sus scrofa]|47523086|ref|NP_999309.1|	GO:0042744	GO:0070995	GO:0005102	GO:0051920	GO:0043066	GO:0043027	GO:0046983	GO:0004601	GO:0016480	GO:0043154	GO:0044445	GO:0001016	GO:0031410	GO:0006954	GO:0048471	GO:0060785	GO:0005634	GO:0005782	GO:0032967	GO:0005739
gi|340007402|ref|NP_001229989.1|	RAB10, member RAS oncogene family [Sus scrofa]|340007402|ref|NP_001229989.1|	GO:0005525	GO:0005794	GO:0071236	GO:0005886	GO:0005515	GO:0006886	GO:0005802	GO:0007264	GO:0048471
gi|311258000|ref|XP_003127386.1|	PREDICTED: AP-2 complex subunit alpha-1 isoform 1 [Sus scrofa]|311258000|ref|XP_003127386.1|	GO:0007411	GO:0030122	GO:0042059	GO:0048011	GO:0008022	GO:0016032	GO:0008565	GO:0016323	GO:0030130	GO:0006886	GO:0005829	GO:0019886	GO:0050690	GO:0006897	GO:0007268	GO:0006895	GO:0016324
gi|350538593|ref|NP_001233247.1|	phosphoglucomutase-1 [Sus scrofa] >gi|321574209|gb|ADW94631.1| phosphoglucomutase 1 [Sus scrofa]|350538593|ref|NP_001233247.1|	GO:0005829	GO:0005980	GO:0019388	GO:0015629	GO:0000287	GO:0005992	GO:0006006	GO:0004614	GO:0044281	GO:0005978
gi|350539577|ref|NP_001233167.1|	coatomer subunit gamma-2 [Sus scrofa] >gi|301087607|gb|ADK56184.1| coatomer protein complex subunit gamma 2 [Sus scrofa]|350539577|ref|NP_001233167.1|	GO:0006891	GO:0006890	GO:0006886	GO:0030126	GO:0005198
gi|148226851|ref|NP_001090933.1|	ATP synthase subunit f, mitochondrial [Sus scrofa] >gi|117660512|gb|ABK55624.1| mitochondrial Atp5j2 [Sus scrofa]|148226851|ref|NP_001090933.1|	GO:0000276	GO:0016021	GO:0006200	GO:0006754	GO:0015992
gi|311251336|ref|XP_003124563.1|	PREDICTED: elongation factor Tu, mitochondrial-like [Sus scrofa]|311251336|ref|XP_003124563.1|	GO:0003746	GO:0005743	GO:0042645	GO:0006414	GO:0006184	GO:0003924	GO:0005525
gi|238018148|ref|NP_001153899.1|	ADP-ribosylation factor 1 [Sus scrofa] >gi|212725657|gb|ACJ38117.1| ADP-ribosylation factor 1 [Sus scrofa] >gi|237638742|gb|ACR07973.1| ADP-ribosylation factor 1 [Sus scrofa]|238018148|ref|NP_001153899.1|	GO:0005057	GO:0000139	GO:0005515	GO:0016032	GO:0005525	GO:0015031	GO:0006878	GO:0006184	GO:0005829	GO:0019886	GO:0050690	GO:0007264	GO:0060872	GO:0006892	GO:0006661	GO:0006890	GO:0048471	GO:0003924	GO:0005886	GO:0048205	GO:0030017
gi|164543|gb|AAA31072.1|	malate dehydrogenase (EC 1.1.1.37), partial [Sus scrofa]|164543|gb|AAA31072.1|	GO:0006107	GO:0005829	GO:0051287	GO:0030060	GO:0005739	GO:0006734	GO:0006108	GO:0005813	GO:0006099	GO:0004470	GO:0044262	GO:0047860	GO:0006094
gi|47523672|ref|NP_999468.1|	2~-5~-oligoadenylate synthase 1 [Sus scrofa] >gi|6226834|sp|Q29599.3|OAS1_PIG RecName: Full=2~-5~-oligoadenylate synthase 1; Short=(2-5~)oligo(A) synthase 1; Short=2-5A synthase 1; AltName: Full=p42 OAS >gi|3451331|emb|CAA12397.1| 2~-5~ oligoadenyla|47523672|ref|NP_999468.1|	GO:0060337	GO:0005829	GO:0008270	GO:0051259	GO:0006164	GO:0005739	GO:0035457	GO:0003725	GO:0005524	GO:0060700	GO:0001730	GO:0045071	GO:0005576	GO:0051607	GO:0005783	GO:0060333	GO:0005634
gi|347300243|ref|NP_001231430.1|	glutamate dehydrogenase 1, mitochondrial [Sus scrofa]|347300243|ref|NP_001231430.1|	GO:0034641	GO:0070728	GO:0004352	GO:0004353	GO:0005759	GO:0070403	GO:0010044	GO:0043531	GO:0005525	GO:0005743	GO:0006538	GO:0006537	GO:0007616	GO:0042802	GO:0055114	GO:0019899	GO:0005524	GO:0032024
gi|350584800|ref|XP_003355778.2|	PREDICTED: cytochrome c oxidase subunit 4 isoform 1, mitochondrial-like [Sus scrofa]|350584800|ref|XP_003355778.2|	GO:0007584	GO:0005751	GO:0016021	GO:0005634	GO:0055114	GO:0004129
gi|264681430|ref|NP_001161110.1|	3-ketoacyl-CoA thiolase, mitochondrial [Sus scrofa] >gi|262036903|dbj|BAI47587.1| acetyl-Coenzyme A acyltransferase 2 [Sus scrofa]|264681430|ref|NP_001161110.1|	GO:0003988	GO:0005743	GO:0006084	GO:0006916	GO:0006635	GO:0005515	GO:0006695
gi|222090420|gb|ACM42418.1|	carnitine palmitoyltransferase II [Sus scrofa]|222090420|gb|ACM42418.1|	GO:0006853	GO:0005730	GO:0046320	GO:0005743	GO:0006635	GO:0004095
gi|335290197|ref|XP_003356098.1|	PREDICTED: LOW QUALITY PROTEIN: 40S ribosomal protein S9-like, partial [Sus scrofa]|335290197|ref|XP_003356098.1|	GO:0000184	GO:0006415	GO:0006413	GO:0005515	GO:0006414	GO:0005730	GO:0045182	GO:0008284	GO:0006417	GO:0003735	GO:0019083	GO:0006614	GO:0019843	GO:0022627
gi|350582773|ref|XP_003481353.1|	PREDICTED: 40S ribosomal protein S7-like isoform 2 [Sus scrofa] >gi|350582771|ref|XP_003481352.1| PREDICTED: 40S ribosomal protein S7-like isoform 1 [Sus scrofa]|350582773|ref|XP_003481353.1|	GO:0030097	GO:0000184	GO:0006415	GO:0006413	GO:0005515	GO:0005815	GO:0006414	GO:0005730	GO:0051726	GO:0009790	GO:0003735	GO:0003723	GO:0019083	GO:0042274	GO:0006614	GO:0032040	GO:0030686	GO:0006364	GO:0022627
gi|219521964|ref|NP_001137170.1|	long-chain-fatty-acid--CoA ligase 3 [Sus scrofa] >gi|217314893|gb|ACK36981.1| acyl-CoA synthetase long-chain family member 3 [Sus scrofa]|219521964|ref|NP_001137170.1|	GO:0042998	GO:0019901	GO:0016021	GO:0005789	GO:0005794	GO:0005741	GO:0006633	GO:0019432	GO:0007420	GO:0019904	GO:0004467	GO:0014070	GO:0035338	GO:0048471	GO:0005811	GO:0005524	GO:0007584	GO:0005778
gi|47523618|ref|NP_999441.1|	citrate synthase, mitochondrial precursor [Sus scrofa] >gi|116470|sp|P00889.2|CISY_PIG RecName: Full=Citrate synthase, mitochondrial; Flags: Precursor >gi|164419|gb|AAA31017.1| citrate synthase precursor (EC 4.1.3.7) [Sus scrofa]|47523618|ref|NP_999441.1|	GO:0031625	GO:0006101	GO:0071158	GO:0031594	GO:0001707	GO:0005759	GO:0043457	GO:0004691	GO:0005952	GO:0046827	GO:0006107	GO:0005886	GO:0048240	GO:0048471	GO:0032403	GO:0051966	GO:0004108	GO:0005794	GO:0071333	GO:0045667	GO:0005524	GO:0071374	GO:0018105	GO:0019901	GO:0046777	GO:2000810	GO:0061136	GO:0051447	GO:0006099	GO:0005634	GO:0005813	GO:0044262
gi|47522916|ref|NP_999215.1|	glutathione S-transferase omega-1 [Sus scrofa] >gi|20141290|sp|Q9N1F5.2|GSTO1_PIG RecName: Full=Glutathione S-transferase omega-1; Short=GSTO-1; AltName: Full=Glutathione S-transferase omega 1-1; Short=GSTO 1-1; AltName: Full=Glutathione-dependent d|47522916|ref|NP_999215.1|	GO:0004364	GO:0050610	GO:0042178	GO:0019853	GO:0005829	GO:0071243	GO:0045174	GO:0055114
gi|311268489|ref|XP_003132080.1|	PREDICTED: fatty aldehyde dehydrogenase-like [Sus scrofa]|311268489|ref|XP_003132080.1|	GO:0005789	GO:0007417	GO:0004030	GO:0033306	GO:0005743	GO:0004029	GO:0008544	GO:0016021	GO:0007422	GO:0006081	GO:0055114
gi|350582213|ref|XP_003481224.1|	PREDICTED: 60S ribosomal protein L7a-like [Sus scrofa] >gi|350582215|ref|XP_003481225.1| PREDICTED: 60S ribosomal protein L7a-like [Sus scrofa] >gi|335285208|ref|XP_003125024.2| PREDICTED: 60S ribosomal protein L7a-like isoform 1 [Sus scrofa]|350582213|ref|XP_003481224.1|	GO:0006413	GO:0019083	GO:0003729	GO:0006364	GO:0042273	GO:0003735	GO:0006414	GO:0003677	GO:0006415	GO:0042788	GO:0042803	GO:0006614	GO:0022625	GO:0016020	GO:0000184
gi|350587405|ref|XP_003482406.1|	PREDICTED: cytosolic beta-glucosidase-like, partial [Sus scrofa]|350587405|ref|XP_003482406.1|	GO:0006687	GO:0005975	GO:0043169	GO:0006644	GO:0046477	GO:0044281	GO:0017042	GO:0005829	GO:0004565	GO:0008422	GO:0016139
gi|346716335|ref|NP_001231184.1|	lysosome-associated membrane glycoprotein 2 isoform 1 precursor [Sus scrofa]|346716335|ref|NP_001231184.1|	GO:0030168	GO:0005765	GO:0031088	GO:0031902	GO:0002576	GO:0005886
gi|72535188|ref|NP_001026956.1|	GTP-binding protein SAR1a [Sus scrofa] >gi|75060235|sp|Q52NJ3.1|SAR1A_PIG RecName: Full=GTP-binding protein SAR1a >gi|62868640|gb|AAY17508.1| GTP-binding protein SAR1a [Sus scrofa]|72535188|ref|NP_001026956.1|	GO:0016529	GO:0006184	GO:0006888	GO:0003924	GO:0006886	GO:0005794	GO:0005525
gi|194041608|ref|XP_001928080.1|	PREDICTED: mitotic checkpoint protein BUB3 isoform 2 [Sus scrofa]|194041608|ref|XP_001928080.1|	GO:0005515	GO:0000236	GO:0051983	GO:0007094	GO:0051436	GO:0008608	GO:0000777	GO:0051301	GO:0005730	GO:0005829	GO:0007126	GO:0000070	GO:0031145
gi|85792253|gb|ABC84194.1|	eukaryotic translation initiation factor 4A isoform 2 [Sus scrofa]|85792253|gb|ABC84194.1|	GO:0003743	GO:0016281	GO:0005829	GO:0000289	GO:0008026	GO:0019221	GO:0005524	GO:0005515	GO:0006446	GO:0019048
gi|194041937|ref|XP_001928912.1|	PREDICTED: alpha-centractin [Sus scrofa]|194041937|ref|XP_001928912.1|	GO:0019886	GO:0005869	GO:0000086	GO:0016192	GO:0005813	GO:0005524	GO:0005829
gi|347300325|ref|NP_001231461.1|	dehydrogenase/reductase SDR family member 11 [Sus scrofa]|347300325|ref|NP_001231461.1|	GO:0005576	GO:0016491	GO:0055114	GO:0000166
gi|346421380|ref|NP_001231062.1|	ATP-binding cassette sub-family D member 3 [Sus scrofa]|346421380|ref|NP_001231062.1|	GO:0006635	GO:0015910	GO:0043621	GO:0005743	GO:0016021	GO:0005829	GO:0007031	GO:0042493	GO:0042626	GO:0042760	GO:0055085	GO:0042803	GO:0006200	GO:0005524	GO:0005778
gi|114326183|ref|NP_001041537.1|	ADP-ribosylation factor 4 [Sus scrofa] >gi|221327932|gb|ACM17702.1| ADP-ribosylation factor 4 [Sus scrofa] >gi|203283175|gb|ACH96700.1| ADP-ribosylation factor 4 [Sus scrofa] >gi|62208269|gb|AAX77012.1| ADP-ribosylation factor family-like protein [S|114326183|ref|NP_001041537.1|	GO:0016192	GO:0007264	GO:0007420	GO:0006184	GO:0005515	GO:0003924	GO:0048678	GO:0015031	GO:0005794	GO:0005525	GO:0007173	GO:0005886
gi|311277187|ref|XP_003135530.1|	PREDICTED: translocon-associated protein subunit delta-like isoform 1 [Sus scrofa]|311277187|ref|XP_003135530.1|	GO:0006412	GO:0005784	GO:0005509	GO:0016021	GO:0006614
gi|347300323|ref|NP_001231460.1|	thioredoxin-dependent peroxide reductase, mitochondrial [Sus scrofa]|347300323|ref|NP_001231460.1|	GO:0008385	GO:0032496	GO:0042744	GO:0008022	GO:0051920	GO:0019901	GO:0033673	GO:0043027	GO:0004601	GO:0008284	GO:0001893	GO:0043154	GO:0042802	GO:0051881	GO:0030099	GO:0005769	GO:0007005	GO:0055114	GO:0051092	GO:0043524	GO:0008785	GO:0005739
gi|335284397|ref|XP_003354597.1|	PREDICTED: major vault protein isoform 1 [Sus scrofa]|335284397|ref|XP_003354597.1|	GO:0005737	GO:0005643	GO:0042493	GO:0005515	GO:0051028	GO:0030529	GO:0015031
gi|740987|prf||2006263A	Arg Gly amidinotransferase|740987|prf||2006263A	GO:0046689	GO:0006979	GO:0016813	GO:0005743	GO:0015068	GO:0007584	GO:0034641	GO:0043434	GO:0005758	GO:0006601	GO:0042246	GO:0009790
gi|350591495|ref|XP_003132454.3|	PREDICTED: coatomer subunit gamma [Sus scrofa]|350591495|ref|XP_003132454.3|	GO:0030126	GO:0005829	GO:0006890	GO:0006891	GO:0072384	GO:0048205	GO:0006886	GO:0005198	GO:0005634	GO:0051683
gi|417185|sp|P80229.1|ILEU_PIG	RecName: Full=Leukocyte elastase inhibitor; Short=LEI; AltName: Full=Leukocyte neutral proteinase inhibitor; Short=LNPI; AltName: Full=Serpin B1|417185|sp|P80229.1|ILEU_PIG	GO:0005737	GO:0042176	GO:0005615	GO:0010951	GO:0004867	GO:0030162
gi|47522710|ref|NP_999050.1|	mannosyl-oligosaccharide 1,2-alpha-mannosidase IA [Sus scrofa] >gi|41017248|sp|O02773.1|MA1A1_PIG RecName: Full=Mannosyl-oligosaccharide 1,2-alpha-mannosidase IA; AltName: Full=Man(9)-alpha-mannosidase; Short=Man9-mannosidase; AltName: Full=Mannosid|47522710|ref|NP_999050.1|	GO:0005509	GO:0018279	GO:0016021	GO:0000139	GO:0005793	GO:0004571	GO:0043687	GO:0005789
gi|46396062|sp|Q865F1.1|MTP_PIG	RecName: Full=Microsomal triglyceride transfer protein large subunit; Flags: Precursor >gi|47523450|ref|NP_999350.1| microsomal triglyceride transfer protein large subunit precursor [Sus scrofa] >gi|28974486|gb|AAO61497.1| microsomal triglyceride tr|46396062|sp|Q865F1.1|MTP_PIG	GO:0031988	GO:0042953	GO:0006641	GO:0031526	GO:0008289	GO:0006869	GO:0034185	GO:0005788	GO:0005791	GO:0005319	GO:0046982	GO:0031528	GO:0042632	GO:0016323	GO:0006497	GO:0044281	GO:0005794	GO:0051592
gi|350588020|ref|XP_003357153.2|	PREDICTED: protein transport protein Sec31A [Sus scrofa]|350588020|ref|XP_003357153.2|	GO:0002474	GO:0048306	GO:0051592	GO:0030127	GO:0015031	GO:0005789	GO:0005829	GO:0019886	GO:0006987	GO:0048208	GO:0048471	GO:0043687	GO:0018279
gi|347300163|ref|NP_001231396.1|	succinate-semialdehyde dehydrogenase, mitochondrial [Sus scrofa]|347300163|ref|NP_001231396.1|	GO:0006541	GO:0009450	GO:0051287	GO:0051289	GO:0006083	GO:0007417	GO:0046459	GO:0005759	GO:0007269	GO:0042135	GO:0004777	GO:0009791	GO:0006105	GO:0031406	GO:0006650	GO:0006681	GO:0006006	GO:0006749	GO:0006536	GO:0042803	GO:0022904	GO:0006678
gi|311264036|ref|XP_003129968.1|	PREDICTED: 40S ribosomal protein S25-like isoform 2 [Sus scrofa] >gi|311264034|ref|XP_003129967.1| PREDICTED: 40S ribosomal protein S25-like isoform 1 [Sus scrofa]|311264036|ref|XP_003129968.1|	GO:0006413	GO:0019083	GO:0003723	GO:0005730	GO:0003735	GO:0006414	GO:0022627	GO:0006415	GO:0000028	GO:0006614	GO:0000184
gi|66793461|ref|NP_001019759.1|	UDP-N-acetylglucosamine transporter [Sus scrofa] >gi|62868648|gb|AAY17512.1| UDP-N-acetylglucosamine transporter [Sus scrofa]|66793461|ref|NP_001019759.1|	GO:0016021	GO:0000139	GO:0015788	GO:0006047	GO:0005462	GO:0008643	GO:0005351
gi|48675943|ref|NP_001001640.1|	amine oxidase [flavin-containing] A [Sus scrofa] >gi|62899648|sp|Q6Q2J0.1|AOFA_PIG RecName: Full=Amine oxidase [flavin-containing] A; AltName: Full=Monoamine oxidase type A; Short=MAO-A >gi|45551418|gb|AAS68020.1| monoamine oxidase A [Sus scrofa]|48675943|ref|NP_001001640.1|	GO:0008131	GO:0042420	GO:0055114	GO:0042428	GO:0016021	GO:0006805	GO:0005741	GO:0042443	GO:0007269	GO:0042135	GO:0050660	GO:0042136	GO:0007610	GO:0051378
gi|298160993|ref|NP_001177169.1|	glycerol-3-phosphate dehydrogenase [NAD+], cytoplasmic [Sus scrofa]|298160993|ref|NP_001177169.1|	GO:0051287	GO:0005829	GO:0004368	GO:0009331	GO:0017057	GO:0005739	GO:0006098	GO:0071320	GO:0004367	GO:0006116	GO:0071356	GO:0046168	GO:0019432	GO:0006654	GO:0006094	GO:0004345	GO:0050661	GO:0042803	GO:0047936	GO:0030246	GO:0005783
gi|350593534|ref|XP_003483707.1|	PREDICTED: grancalcin-like [Sus scrofa]|350593534|ref|XP_003483707.1|	GO:0046982	GO:0005829	GO:0042803	GO:0005509	GO:0005886
gi|321400096|ref|NP_001189469.1|	transmembrane emp24 domain-containing protein 7 precursor [Sus scrofa]|321400096|ref|NP_001189469.1|	GO:0005789	GO:0033116	GO:0030127	GO:0016021	GO:0030126	GO:0015031
gi|298160936|ref|NP_001177146.1|	transmembrane protein C9orf46 [Sus scrofa]|298160936|ref|NP_001177146.1|	GO:0006935	GO:0005887	GO:0006954	GO:0005515	GO:0010756	GO:0005739
gi|12231040|sp|Q29048.2|VATA_PIG	RecName: Full=V-type proton ATPase catalytic subunit A; Short=V-ATPase subunit A; AltName: Full=V-ATPase 69 kDa subunit; AltName: Full=Vacuolar proton pump subunit alpha|12231040|sp|Q29048.2|VATA_PIG	GO:0046961	GO:0033572	GO:0090382	GO:0008286	GO:0006879	GO:0033180	GO:0046933	GO:0015991	GO:0005902	GO:0005829	GO:0051701	GO:0042777	GO:0005887	GO:0005524	GO:0016324	GO:0005739
gi|72535208|ref|NP_001026966.1|	2~-5~-oligoadenylate synthase 2 [Sus scrofa] >gi|45594389|gb|AAQ22351.1| 2~-5~ oligoadenylate synthetase 2 [Sus scrofa]|72535208|ref|NP_001026966.1|	GO:0009615	GO:0060337	GO:0005829	GO:0018377	GO:0008270	GO:0006164	GO:0005739	GO:0006401	GO:0003725	GO:0005524	GO:0001730	GO:0006486	GO:0048471	GO:0016020	GO:0005783	GO:0060333	GO:0005634
gi|350591601|ref|XP_003132498.3|	PREDICTED: sodium/potassium-transporting ATPase subunit beta-3-like [Sus scrofa]|350591601|ref|XP_003132498.3|	GO:0006814	GO:0005890	GO:0046034	GO:0005391	GO:0005901	GO:0006813	GO:0050900	GO:0042470	GO:0034220	GO:0007596
gi|335287882|ref|XP_003126232.2|	PREDICTED: LOW QUALITY PROTEIN: sterol O-acyltransferase 2-like [Sus scrofa]|335287882|ref|XP_003126232.2|	GO:0033344	GO:0000062	GO:0034379	GO:0016021	GO:0005903	GO:0007584	GO:0034736	GO:0030299	GO:0015485	GO:0034435	GO:0010742	GO:0042632	GO:0008203	GO:0005789
gi|335310107|ref|XP_003361890.1|	PREDICTED: non-POU domain-containing octamer-binding protein [Sus scrofa]|335310107|ref|XP_003361890.1|	GO:0042382	GO:0016363	GO:0006396	GO:0003676	GO:0006259	GO:0042802	GO:0006351	GO:0006974
gi|311259452|ref|XP_003128108.1|	PREDICTED: 40S ribosomal protein S8-like [Sus scrofa]|311259452|ref|XP_003128108.1|	GO:0006413	GO:0019083	GO:0000462	GO:0003735	GO:0006414	GO:0022627	GO:0006415	GO:0006614	GO:0000184
gi|335285948|ref|XP_003131991.2|	PREDICTED: very long-chain specific acyl-CoA dehydrogenase, mitochondrial-like isoform 1 [Sus scrofa]|335285948|ref|XP_003131991.2|	GO:0046322	GO:0050660	GO:0015980	GO:0001659	GO:0090181	GO:0005743	GO:0042645	GO:0006987	GO:0033539	GO:0004466	GO:0045717
gi|343790912|ref|NP_001230514.1|	ras-related C3 botulinum toxin substrate 1 (rho family, small GTP binding protein Rac1) [Sus scrofa]|343790912|ref|NP_001230514.1|	GO:0019897	GO:0005525	GO:0006954	GO:0016032	GO:0030334	GO:0030838	GO:0048813	GO:0048261	GO:0007160	GO:0007411	GO:0043652	GO:0097178	GO:0048532	GO:0002093	GO:0030027	GO:0031295	GO:0005829	GO:0048011	GO:0030168	GO:0043552	GO:0008624	GO:0050690	GO:0090103	GO:0001891	GO:0000139	GO:0045740	GO:0003382	GO:0035025	GO:0007520	GO:0016601	GO:0045216	GO:0034446	GO:0010310	GO:0002551	GO:0017137	GO:0051668	GO:0042470	GO:0031996	GO:0030742	GO:0019901	GO:0008283	GO:0045453	GO:0006972	GO:0003924	GO:0060263	GO:0010592	GO:0071542	GO:0060071
gi|350593062|ref|XP_003133228.3|	PREDICTED: xaa-Pro aminopeptidase 1 isoform 2 [Sus scrofa]|350593062|ref|XP_003133228.3|	GO:0070006	GO:0030145	GO:0006508	GO:0005829	GO:0042803	GO:0010815
gi|164382|gb|AAA31002.1|	Na+, K+-ATPase alpha-subunit precursor [Sus scrofa]|164382|gb|AAA31002.1|	GO:0051087	GO:0045989	GO:0045822	GO:0003869	GO:0016323	GO:0042470	GO:0005794	GO:0046872	GO:0006754	GO:0042383	GO:0005391	GO:0045823	GO:0042493	GO:0031947	GO:0034220	GO:0005890	GO:0006813	GO:0002026	GO:0005783	GO:0002028	GO:0005524	GO:0008217
gi|350582501|ref|XP_003481284.1|	PREDICTED: atlastin-2-like isoform 2 [Sus scrofa]|350582501|ref|XP_003481284.1|	GO:0007029	GO:0016021	GO:0051260	GO:0042802	GO:0006184	GO:0007030	GO:0006888	GO:0003924	GO:0005789	GO:0005525
gi|113205854|ref|NP_001038066.1|	40S ribosomal protein S3 [Sus scrofa] >gi|115502828|sp|Q0Z8U2.1|RS3_PIG RecName: Full=40S ribosomal protein S3 >gi|110006645|gb|ABG48767.1| ribosomal protein S3 [Sus scrofa]|113205854|ref|NP_001038066.1|	GO:0000184	GO:0006415	GO:0006413	GO:0032587	GO:0003684	GO:0019901	GO:0006919	GO:0006414	GO:0051536	GO:0045738	GO:0032088	GO:0030425	GO:0006917	GO:0051059	GO:0004519	GO:0003735	GO:0019083	GO:0006614	GO:0012505	GO:0005634	GO:0003906	GO:0003729	GO:0022627
gi|148747594|ref|NP_001092068.1|	60S acidic ribosomal protein P0 [Sus scrofa] >gi|182705234|sp|Q29214.2|RLA0_PIG RecName: Full=60S acidic ribosomal protein P0; AltName: Full=60S ribosomal protein L10E >gi|83854099|gb|ABC47963.1| ribosomal phosphoprotein large PO subunit [Sus scrofa|148747594|ref|NP_001092068.1|	GO:0006413	GO:0019083	GO:0003723	GO:0003735	GO:0006414	GO:0042254	GO:0005515	GO:0006415	GO:0019048	GO:0006614	GO:0022625	GO:0000184	GO:0005634
gi|194035831|ref|XP_001928742.1|	PREDICTED: coatomer subunit alpha isoform 2 [Sus scrofa]|194035831|ref|XP_001928742.1|	GO:0030157	GO:0030126	GO:0005829	GO:0006890	GO:0005615	GO:0006891	GO:0048205	GO:0006886	GO:0005198	GO:0005179
gi|311260951|ref|XP_003128591.1|	PREDICTED: dehydrogenase/reductase SDR family member 1-like [Sus scrofa]|311260951|ref|XP_003128591.1|	GO:0005743	GO:0016491	GO:0005783	GO:0000166	GO:0055114
gi|60394813|sp|Q29201.4|RS16_PIG	RecName: Full=40S ribosomal protein S16 >gi|212549659|ref|NP_001131092.1| 40S ribosomal protein S16 [Sus scrofa] >gi|335289675|ref|XP_003355953.1| PREDICTED: 40S ribosomal protein S16-like isoform 2 [Sus scrofa] >gi|335289677|ref|XP_003355954.1| PRE|60394813|sp|Q29201.4|RS16_PIG	GO:0006413	GO:0019083	GO:0003723	GO:0006364	GO:0003735	GO:0006414	GO:0022627	GO:0042274	GO:0006415	GO:0006614	GO:0000184
gi|3288991|gb|AAC25597.1|	fructose-1,6-bisphosphatase [Sus scrofa]|3288991|gb|AAC25597.1|	GO:0045820	GO:0051289	GO:0016208	GO:0006111	GO:0046580	GO:0005829	GO:0042132	GO:0071286	GO:0030308	GO:0000287	GO:0035690	GO:0016311	GO:0048029	GO:0006002
gi|350593858|ref|XP_003133682.3|	PREDICTED: carbamoyl-phosphate synthase [ammonia], mitochondrial isoform 1 [Sus scrofa]|350593858|ref|XP_003133682.3|	GO:0004175	GO:0032496	GO:0019240	GO:0032094	GO:0005980	GO:0000050	GO:0071400	GO:0071548	GO:0005509	GO:0005743	GO:0005543	GO:0007494	GO:0060416	GO:0019433	GO:0071377	GO:0042645	GO:0005730	GO:0070365	GO:0010043	GO:0016595	GO:0072341	GO:0043234	GO:0042594	GO:0042493	GO:0043200	GO:0050667	GO:0006543	GO:0071320	GO:0046209	GO:0045909	GO:0055081	GO:0009636	GO:0032403	GO:0044344	GO:0070409	GO:0005524	GO:0004087
gi|335282386|ref|XP_003354050.1|	PREDICTED: elongation factor 2 [Sus scrofa]|335282386|ref|XP_003354050.1|	GO:0005829	GO:0003746	GO:0006414	GO:0006184	GO:0005515	GO:0003924	GO:0005844	GO:0005525
gi|120968|sp|P80147.2|GABT_PIG	RecName: Full=4-aminobutyrate aminotransferase, mitochondrial; AltName: Full=(S)-3-amino-2-methylpropionate transaminase; AltName: Full=GABA aminotransferase; Short=GABA-AT; AltName: Full=Gamma-amino-N-butyrate transaminase; Short=GABA transaminase;|120968|sp|P80147.2|GABT_PIG	GO:0001666	GO:0005829	GO:0009450	GO:0045776	GO:0032144	GO:0045471	GO:0010039	GO:0003867	GO:0007620	GO:0007626	GO:0048148	GO:0007269	GO:0042135	GO:0035094	GO:0047298	GO:0005759	GO:0042493	GO:0032145	GO:0042803	GO:0030170
gi|346421435|ref|NP_001231091.1|	sorbitol dehydrogenase [Sus scrofa]|346421435|ref|NP_001231091.1|	GO:0051287	GO:0055114	GO:0030317	GO:0008270	GO:0031966	GO:0046370	GO:0051160	GO:0005615	GO:0003939	GO:0005929	GO:0019861	GO:0006062	GO:0006006	GO:0030246
gi|350589164|ref|XP_003357646.2|	PREDICTED: acyl-CoA:lysophosphatidylglycerol acyltransferase 1-like [Sus scrofa]|350589164|ref|XP_003357646.2|	GO:0005789	GO:0046474	GO:0036148	GO:0016746	GO:0044281	GO:0016021
gi|349732262|ref|NP_001231870.1|	3-hydroxyanthranilate 3,4-dioxygenase [Sus scrofa]|349732262|ref|NP_001231870.1|	GO:0005829	GO:0000334	GO:0008198	GO:0019805	GO:0055114	GO:0031966	GO:0009435	GO:0009055	GO:0019825	GO:0006569	GO:0070050	GO:0010043	GO:0046686
gi|311272935|ref|XP_003133651.1|	PREDICTED: NADH-ubiquinone oxidoreductase 75 kDa subunit, mitochondrial isoform 1 [Sus scrofa]|311272935|ref|XP_003133651.1|	GO:0046034	GO:0051537	GO:0008137	GO:0005747	GO:0006915	GO:0046872	GO:0072593	GO:0009055	GO:0051881	GO:0005758	GO:0051539	GO:0006120	GO:0005515
gi|330417958|ref|NP_001155225.1|	phosphoenolpyruvate carboxykinase [GTP], mitochondrial [Sus scrofa] >gi|238863892|gb|ACR66222.1| phosphoenolpyruvate carboxykinase 2 [Sus scrofa]|330417958|ref|NP_001155225.1|	GO:0006107	GO:0030145	GO:0051384	GO:0005515	GO:0016310	GO:0016301	GO:0006094	GO:0005759	GO:0004613	GO:0005525
gi|89573899|gb|ABD77175.1|	ribosomal protein L18 [Sus scrofa]|89573899|gb|ABD77175.1|	GO:0006413	GO:0019083	GO:0003723	GO:0006355	GO:0003735	GO:0006414	GO:0043565	GO:0046983	GO:0003700	GO:0006415	GO:0006614	GO:0022625	GO:0000184
gi|194038734|ref|XP_001929226.1|	PREDICTED: protein transport protein Sec23A isoform 2 [Sus scrofa]|194038734|ref|XP_001929226.1|	GO:0005829	GO:0002474	GO:0008270	GO:0018279	GO:0000139	GO:0043687	GO:0048208	GO:0005515	GO:0030868	GO:0030127	GO:0048471	GO:0006886	GO:0019886
gi|116175263|ref|NP_001070687.1|	ubiquitin-conjugating enzyme E2 J1 [Sus scrofa] >gi|115371729|gb|ABI96189.1| UB2J1 [Sus scrofa]|116175263|ref|NP_001070687.1|	GO:0005789	GO:0016567	GO:0005524	GO:0004842	GO:0016021
gi|47522750|ref|NP_999125.1|	voltage-dependent anion-selective channel protein 1 [Sus scrofa] >gi|75050406|sp|Q9MZ16.3|VDAC1_PIG RecName: Full=Voltage-dependent anion-selective channel protein 1; Short=VDAC-1 >gi|8745552|gb|AAF78963.1|AF268461_1 voltage-dependent anion channel |47522750|ref|NP_999125.1|	GO:0044070	GO:0034765	GO:0015288	GO:0007612	GO:0005743	GO:0006915	GO:0032403	GO:0042645	GO:0005741	GO:0007270	GO:0006851	GO:0008308	GO:0000166	GO:0019048	GO:0046930	GO:0001662	GO:0005886
gi|350581964|ref|XP_003124841.3|	PREDICTED: constitutive coactivator of PPAR-gamma-like protein 1, partial [Sus scrofa]|350581964|ref|XP_003124841.3|	GO:0005737	GO:0005886	GO:0003723
gi|346716265|ref|NP_001231271.1|	omega-amidase NIT2 [Sus scrofa]|346716265|ref|NP_001231271.1|	GO:0006807	GO:0050152	GO:0005813
gi|40889737|pdb|1UDY|D	Chain D, Medium-Chain Acyl-Coa Dehydrogenase With 3-Thiaoctanoyl-Coa >gi|40889735|pdb|1UDY|B Chain B, Medium-Chain Acyl-Coa Dehydrogenase With 3-Thiaoctanoyl-Coa >gi|40889736|pdb|1UDY|C Chain C, Medium-Chain Acyl-Coa Dehydrogenase With 3-Thiaoctanoy|40889737|pdb|1UDY|D	GO:0050660	GO:0051289	GO:0055007	GO:0006111	GO:0005759	GO:0009791	GO:0016853	GO:0031966	GO:0051384	GO:0046688	GO:0042802	GO:0030424	GO:0005978	GO:0042594	GO:0042493	GO:0009409	GO:0051793	GO:0000062	GO:0033539	GO:0001889	GO:0019254	GO:0045329	GO:0007584	GO:0070991
gi|311270046|ref|XP_003132745.1|	PREDICTED: 60S ribosomal protein L24-like isoform 1 [Sus scrofa]|311270046|ref|XP_003132745.1|	GO:0000184	GO:0006415	GO:0006413	GO:0021554	GO:0000027	GO:0006414	GO:0022625	GO:0060041	GO:0003735	GO:0003723	GO:0010458	GO:0019083	GO:0031575	GO:0031290	GO:0006614
gi|311252952|ref|XP_003125350.1|	PREDICTED: ketohexokinase-like isoform 3 [Sus scrofa]|311252952|ref|XP_003125350.1|	GO:0009744	GO:0006001	GO:0016310	GO:0044281	GO:0010043	GO:0005524	GO:0004454	GO:0009749	GO:0009750	GO:0005829	GO:0032868
gi|350591605|ref|XP_003483304.1|	PREDICTED: plastin-1-like [Sus scrofa]|350591605|ref|XP_003483304.1|	GO:0005737	GO:0051015	GO:0005509	GO:0005200
gi|311268663|ref|XP_003132151.1|	PREDICTED: 3-ketoacyl-CoA thiolase A, peroxisomal isoform 1 [Sus scrofa]|311268663|ref|XP_003132151.1|	GO:0000038	GO:0048545	GO:0036109	GO:0016401	GO:0005739	GO:0003988	GO:0033540	GO:0007584	GO:0008206	GO:0005515	GO:0042493	GO:0005782
gi|2497487|sp|Q29561.1|KCY_PIG	RecName: Full=UMP-CMP kinase; AltName: Full=Cytidine monophosphate kinase; AltName: Full=Cytidylate kinase; AltName: Full=Deoxycytidylate kinase; AltName: Full=Uridine monophosphate kinase; AltName: Full=Uridine monophosphate/cytidine monophosphate |2497487|sp|Q29561.1|KCY_PIG	GO:0006225	GO:0005829	GO:0046939	GO:0004017	GO:0006240	GO:0004849	GO:0004127	GO:0046705	GO:0005524	GO:0006222	GO:0006227	GO:0033862	GO:0015949	GO:0005634
gi|335308509|ref|XP_003361258.1|	PREDICTED: microsomal glutathione S-transferase 2-like, partial [Sus scrofa]|335308509|ref|XP_003361258.1|	GO:0055114	GO:0006750	GO:0019370	GO:0006805	GO:0004602	GO:0004364	GO:0004464	GO:0005789	GO:0010033	GO:0005886
gi|350587855|ref|XP_003129278.3|	PREDICTED: protein transport protein Sec24D [Sus scrofa]|350587855|ref|XP_003129278.3|	GO:0005829	GO:0002474	GO:0008270	GO:0018279	GO:0000139	GO:0043687	GO:0048208	GO:0030127	GO:0048471	GO:0006886	GO:0019886	GO:0005789
gi|194044992|ref|XP_001928105.1|	PREDICTED: sorting nexin-12 [Sus scrofa]|194044992|ref|XP_001928105.1|	GO:0035091	GO:0016020	GO:0015031	GO:0007154	GO:0005515
gi|335294978|ref|XP_003357366.1|	PREDICTED: coatomer subunit delta isoform 1 [Sus scrofa]|335294978|ref|XP_003357366.1|	GO:0030126	GO:0005829	GO:0006890	GO:0006891	GO:0030131	GO:0005515	GO:0048205	GO:0006886
[truncated: 12 more columns]

## Sheet: bin 5
Gene	GWEIGHT	114	115	116	117	118
EWEIGHT		1	1	1	1	1
gi|350597032|ref|XP_001925921.4| PREDICTED: aldehyde dehydrogenase family 1 member A3, partial [Sus scrofa]	1	0	-0.922577	0.506597	0.536433	-0.993895
gi|335292522|ref|XP_001924480.2| PREDICTED: proteasome subunit beta type-5 [Sus scrofa]	1	0	-1.05706	0.303427	-0.1627	-0.530071
gi|113205886|ref|NP_001038075.1| nucleoside diphosphate kinase B [Sus scrofa] >gi|115311824|sp|Q2EN76.1|NDKB_PIG RecName: Full=Nucleoside diphosphate kinase B; Short=NDK B; Short=NDP kinase B; AltName: Full=Histidine protein kinase NDKB >gi|87047646|gb|ABD18456.1| nm23-H2 [Sus scro	1	0	-0.254612	0.31077	0.31077	-0.125329
gi|335298830|ref|XP_001925616.3| PREDICTED: golgin subfamily A member 4 [Sus scrofa]	1	0	-0.901436	0.276198	0.032026	-0.111031
gi|350582129|ref|XP_003354780.2| PREDICTED: ig kappa chain V-II region RPMI 6410-like [Sus scrofa]	1	0	-1.3837	0.216209	-0.079924	-0.098302
gi|297632416|ref|NP_001172092.1| enhancer of rudimentary homolog [Sus scrofa]	1	0	-1.20879	0.304204	-0.238939	-0.032249
gi|350582270|ref|XP_003125088.3| PREDICTED: zinc finger protein 638-like [Sus scrofa]	1	0	-0.651813	0.096533	0.136327	-0.027374
gi|311255413|ref|XP_001927240.2| PREDICTED: keratin, type II cytoskeletal 79 [Sus scrofa]	1	0	-0.858414	0.963208	-0.22817	-0.006936
gi|297307137|ref|NP_001171999.1| ran-specific GTPase-activating protein [Sus scrofa]	1	0	-0.233727	0.377546	0.112192	-0.002511
gi|297632426|ref|NP_001172096.1| signal sequence receptor, alpha [Sus scrofa]	1	0	-1.00469	0.208947	0.178228	0.004676
gi|335287650|ref|XP_003126108.2| PREDICTED: TRIO and F-actin-binding protein [Sus scrofa]	1	0	-0.472188	0.218958	-0.187114	0.008289
gi|335309593|ref|XP_003361696.1| PREDICTED: 39S ribosomal protein L12, mitochondrial-like, partial [Sus scrofa]	1	0	-1.52622	0.765902	-0.207893	0.070687
gi|166796061|ref|NP_001107756.1| 60S ribosomal protein L5 [Sus scrofa] >gi|164598076|gb|ABY61325.1| ribosomal protein L5 [Sus scrofa]	1	0	-0.769628	0.214803	-0.484821	0.086661
gi|335283403|ref|XP_003123930.2| PREDICTED: lamin-B1 [Sus scrofa]	1	0	-0.571852	0.295756	-0.089871	0.097914
gi|47523730|ref|NP_999500.1| tropomyosin alpha-4 chain [Sus scrofa] >gi|54039746|sp|P67937.3|TPM4_PIG RecName: Full=Tropomyosin alpha-4 chain; AltName: Full=Tropomyosin-4 >gi|3661527|gb|AAC61744.1| tropomyosin 4 [Sus scrofa] >gi|262263207|dbj|BAI48106.1| tropomyosin 4 [Sus scro	1	0	-1.27063	-0.286463	-0.3057	0.100841
gi|335285134|ref|XP_003354782.1| PREDICTED: charged multivesicular body protein 3-like isoform 2 [Sus scrofa]	1	0	-0.779508	0.515493	0.209923	0.116814
gi|350590718|ref|XP_003131850.3| PREDICTED: bleomycin hydrolase-like [Sus scrofa]	1	0	-0.909535	0.727954	0.195724	0.122371
gi|335286747|ref|XP_001924678.3| PREDICTED: hepatoma-derived growth factor-like [Sus scrofa]	1	0	-0.883239	0.347923	0.115661	0.140752
gi|356461003|ref|NP_001238977.1| RNA-binding protein EWS [Sus scrofa] >gi|351738726|gb|AEQ61463.1| EWS [Sus scrofa]	1	0	-0.802319	0.661017	0.497546	0.141879
gi|350590115|ref|XP_003131204.3| PREDICTED: RING finger protein 213-like, partial [Sus scrofa]	1	0	-0.408164	-0.146731	0.794304	0.144439
gi|21585985|gb|AAM55495.1| MHC class I antigen [Sus scrofa]	1	0	-0.630996	-0.092499	0.460634	0.147925
gi|178056596|ref|NP_001116608.1| U6 snRNA-associated Sm-like protein LSm2 [Sus scrofa] >gi|147225158|emb|CAN13335.1| LSM2 homolog, U6 small nuclear RNA associated (S. cerevisiae) [Sus scrofa]	1	0	-0.565111	0.751149	0.174938	0.164119
gi|347543795|ref|NP_001231558.1| phospholipase B-like 1 precursor [Sus scrofa]	1	0	-0.36059	-0.013939	0.265345	0.169925
gi|311260243|ref|XP_001927987.2| PREDICTED: protein CutA isoform 1 [Sus scrofa]	1	0	-1.54684	-0.028608	-0.119399	0.171569
gi|345091084|ref|NP_001230758.1| RNA binding motif protein 25 [Sus scrofa]	1	0	-0.714786	0.423655	-0.171104	0.175386
gi|311247240|ref|XP_003122553.1| PREDICTED: splicing factor 3B subunit 2 [Sus scrofa]	1	0	-0.955701	0.092194	0.041252	0.19356
gi|311248247|ref|XP_003123039.1| PREDICTED: ATP synthase subunit delta, mitochondrial-like isoform 1 [Sus scrofa]	1	0	-1.20978	-0.118821	0.232923	0.199309
gi|311260957|ref|XP_003128592.1| PREDICTED: NEDD8-like [Sus scrofa]	1	0	-0.944718	1.05438	0.866249	0.201307
gi|297591969|ref|NP_001172062.1| ubiquitin-conjugating enzyme E2 L3 [Sus scrofa] >gi|219563058|gb|ACL27888.1| ubiquitin-conjugating enzyme E2L 3 [Sus scrofa]	1	0	-0.364719	-0.19551	-0.15963	0.208009
gi|311247012|ref|XP_003122436.1| PREDICTED: epidermal growth factor receptor kinase substrate 8-like protein 2-like [Sus scrofa]	1	0	-0.704863	0.378379	-0.436454	0.209034
gi|83816981|ref|NP_001033050.1| proteasome subunit beta type-9 [Sus scrofa] >gi|311260176|ref|XP_003128374.1| PREDICTED: proteasome subunit beta type-9-like [Sus scrofa] >gi|110276961|gb|ABG57117.1| proteasome beta 9 subunit [Sus scrofa] >gi|83320492|gb|ABC02872.1| proteasome beta	1	0	-0.346028	0.15868	0.484185	0.238934
gi|335286637|ref|XP_001927783.3| PREDICTED: nitrilase homolog 1 isoform 2 [Sus scrofa]	1	0	-0.9272	0.197803	-0.201434	0.251432
gi|178056623|ref|NP_001116685.1| vesicle-associated membrane protein-associated protein B [Sus scrofa] >gi|160210890|sp|A5GFS8.1|VAPB_PIG RecName: Full=Vesicle-associated membrane protein-associated protein B; Short=VAMP-B; Short=VAMP-associated protein B; Short=VAP-B >gi|147223393	1	0	-0.504317	0.008354	-0.120513	0.266939
gi|346644866|ref|NP_001231105.1| coiled-coil-helix-coiled-coil-helix domain-containing protein 3, mitochondrial [Sus scrofa]	1	0	-1.05764	0.664352	0.15858	0.268986
gi|343790906|ref|NP_001230510.1| calcineurin-like phosphoesterase domain containing 1 [Sus scrofa]	1	0	-1.0306	-0.063233	-0.446083	0.282429
gi|350579011|ref|XP_003121807.3| PREDICTED: acidic leucine-rich nuclear phosphoprotein 32 family member A-like [Sus scrofa]	1	0	-1.41845	0.677432	-0.139551	0.288809
gi|350583507|ref|XP_003481532.1| PREDICTED: cold shock domain-containing protein E1-like [Sus scrofa]	1	0	-0.557586	0.175034	-0.039221	0.289507
gi|335293128|ref|XP_003128866.2| PREDICTED: alpha-adducin [Sus scrofa]	1	0	-0.603037	0.325373	-0.178753	0.291726
gi|264681460|ref|NP_001161124.1| acyl carrier protein, mitochondrial [Sus scrofa] >gi|262204908|dbj|BAI48034.1| NADH dehydrogenase (ubiquinone) 1, alpha/beta subcomplex, 1, 8kDa [Sus scrofa]	1	0	-0.548215	0.048791	0.110287	0.294011
gi|311272290|ref|XP_003133380.1| PREDICTED: CDKN2A-interacting protein isoform 1 [Sus scrofa]	1	0	-0.902823	0.567526	0.78751	0.304491
gi|311274849|ref|XP_001925742.2| PREDICTED: regulation of nuclear pre-mRNA domain-containing protein 1B [Sus scrofa]	1	0	-0.884341	0.24979	-0.2452	0.305304
gi|350583843|ref|XP_003126114.3| PREDICTED: myosin-9 [Sus scrofa]	1	0	-0.57164	0.193525	0.134426	0.319672
gi|47522692|ref|NP_999062.1| long-chain specific acyl-CoA dehydrogenase, mitochondrial precursor [Sus scrofa] >gi|2829676|sp|P79274.1|ACADL_PIG RecName: Full=Long-chain specific acyl-CoA dehydrogenase, mitochondrial; Short=LCAD; Flags: Precursor >gi|1695729|dbj|BAA13965.1| long	1	0	-0.824749	-0.297641	-0.184163	0.333027
gi|350583937|ref|XP_003355432.2| PREDICTED: LIM domain and actin-binding protein 1-like [Sus scrofa]	1	0	-1.20562	0.172889	-0.119622	0.337679
gi|335309460|ref|XP_003361646.1| PREDICTED: nucleolar protein 56-like, partial [Sus scrofa]	1	0	-1.61945	0.429953	0.733144	0.340212
gi|335309807|ref|XP_003361778.1| PREDICTED: delta-aminolevulinic acid dehydratase-like, partial [Sus scrofa]	1	0	-0.635281	-0.276427	-0.027129	0.340301
gi|311254317|ref|XP_001927973.2| PREDICTED: cingulin-like [Sus scrofa]	1	0	-0.669851	-0.037583	0.152415	0.348071
gi|122220|sp|P17630.1|TCO1_PIG RecName: Full=Transcobalamin-1; Short=TC-1; AltName: Full=Cobalophilin; AltName: Full=Haptocorrin; AltName: Full=Protein R; AltName: Full=Transcobalamin I; Short=TC I; Short=TCI; Flags: Precursor >gi|1964|emb|CAA36800.1| unnamed protein product [Sus	1	0	-0.260591	-0.334463	0.106988	0.357353
gi|194037005|ref|XP_001928988.1| PREDICTED: ribonuclease UK114-like isoform 1 [Sus scrofa]	1	0	-0.944505	-0.190471	-0.171966	0.358454
gi|350591288|ref|XP_003483241.1| PREDICTED: filamin-B [Sus scrofa]	1	0	-0.404426	0.238454	0.186488	0.366933
gi|311270597|ref|XP_003132922.1| PREDICTED: 26S proteasome non-ATPase regulatory subunit 9-like [Sus scrofa]	1	0	-1.02118	-0.376734	-0.004049	0.368399
gi|343403848|ref|NP_001230297.1| phosphopantothenoylcysteine decarboxylase [Sus scrofa]	1	0	-0.961693	-0.310879	-0.059026	0.375889
gi|347582660|ref|NP_001231584.1| mesencephalic astrocyte-derived neurotrophic factor precursor [Sus scrofa] >gi|350591263|ref|XP_003483237.1| PREDICTED: mesencephalic astrocyte-derived neurotrophic factor [Sus scrofa] >gi|306563669|gb|ADN03186.1| mesencephalic astrocyte-derived neu	1	0	-0.76576	0.312444	0.102084	0.381452
gi|348605151|ref|NP_001231720.1| hydroxysteroid (17-beta) dehydrogenase 3 [Sus scrofa]	1	0	-0.392457	-0.268641	0.167809	0.384783
gi|311247353|ref|XP_003122594.1| PREDICTED: N-acetylated alpha-linked acidic dipeptidase-like 1 [Sus scrofa]	1	0	-0.553768	0.217504	0.057527	0.395859
gi|350592642|ref|XP_003483508.1| PREDICTED: T-cell receptor beta chain T17T-22-like [Sus scrofa]	1	0	-0.36257	0.007993	0.662965	0.402965
gi|311274576|ref|XP_003134384.1| PREDICTED: small nuclear ribonucleoprotein-associated protein B~-like [Sus scrofa]	1	0	-0.279448	0.353302	0.196873	0.411183
gi|350580630|ref|XP_003123158.3| PREDICTED: far upstream element-binding protein 2-like [Sus scrofa]	1	0	-0.306844	0.603045	0.286668	0.411785
gi|347658999|ref|NP_001231625.1| uncharacterized protein LOC100512671 [Sus scrofa]	1	0	-0.809529	-0.645176	0.260549	0.412863
gi|347922148|ref|NP_001231673.1| charged multivesicular body protein 5 [Sus scrofa]	1	0	-0.431246	-0.069335	0.170609	0.422928
gi|350581149|ref|XP_003480971.1| PREDICTED: matrin-3 [Sus scrofa] >gi|350581147|ref|XP_003480970.1| PREDICTED: matrin-3 [Sus scrofa] >gi|335283551|ref|XP_003354341.1| PREDICTED: matrin-3 [Sus scrofa] >gi|311250254|ref|XP_003124025.1| PREDICTED: matrin-3 isoform 1 [Sus scrofa]	1	0	-1.26283	0.168642	-0.190997	0.428484
gi|120525|sp|P19133.1|FRIL_PIG RecName: Full=Ferritin light chain; Short=Ferritin L subunit	1	0	-1.25412	-0.39401	0.991739	0.488729
gi|350583750|ref|XP_003481579.1| PREDICTED: hsc70-interacting protein-like isoform 1 [Sus scrofa]	1	0	-0.447838	0.390861	0.05053	0.513739
gi|213021241|ref|NP_001132944.1| proteasome subunit alpha type-6 [Sus scrofa] >gi|210062872|gb|ACJ06406.1| proteasome subunit alpha type 6 [Sus scrofa]	1	0	-0.617978	0.503652	0.655962	0.514863
gi|350529387|ref|NP_001231927.1| basic transcription factor 3 [Sus scrofa]	1	0	-0.37841	0.084276	0.177506	0.515594
gi|335293690|ref|XP_003129163.2| PREDICTED: general vesicular transport factor p115-like [Sus scrofa]	1	0	-0.379138	0.237533	0.146477	0.521326
gi|68532157|gb|AAY98813.1| proteasome subunit 10 [Sus scrofa] >gi|68532159|gb|AAY98814.1| proteasome subunit 10 [Sus scrofa]	1	0	-0.427523	0.086654	0.499379	0.521427
gi|346986456|ref|NP_001231378.1| nucleoside diphosphate kinase 3 isoform 1 precursor [Sus scrofa]	1	0	-0.325361	0.349529	0.23441	0.524468
gi|335282345|ref|XP_003354038.1| PREDICTED: mitochondrial import inner membrane translocase subunit Tim13-like [Sus scrofa]	1	0	-0.278382	0.035089	0.231969	0.525565
gi|350580713|ref|XP_003480884.1| PREDICTED: hypothetical protein LOC100737370 [Sus scrofa]	1	0	-1.16696	0.818152	0.298117	0.560346
gi|83921643|ref|NP_001033096.1| serine/arginine-rich splicing factor 1 [Sus scrofa] >gi|114152157|sp|Q3YLA6.3|SRSF1_PIG RecName: Full=Serine/arginine-rich splicing factor 1; AltName: Full=Splicing factor, arginine/serine-rich 1 >gi|73810231|gb|AAZ86089.1| splicing factor arginine/	1	0	-0.304942	0.221331	0.16943	0.560488
gi|47522814|ref|NP_999159.1| dihydrolipoyllysine-residue acetyltransferase component of pyruvate dehydrogenase complex, mitochondrial precursor [Sus scrofa] >gi|14587786|dbj|BAB61720.1| dihydrolipoamide acetyltransferase [Sus scrofa]	1	0	-0.371807	-0.177832	0.001371	0.569336
gi|346986466|ref|NP_001231384.1| proteasome (prosome, macropain) subunit, beta type, 4 [Sus scrofa]	1	0	-0.722979	0.637918	0.316905	0.574287
gi|350594669|ref|XP_001926037.4| PREDICTED: ribosome-binding protein 1 [Sus scrofa]	1	0	-0.777608	0.342637	0.255531	0.587857
gi|346644882|ref|NP_001231113.1| reticulocalbin 2, EF-hand calcium binding domain precursor [Sus scrofa]	1	0	-0.680082	0.026533	0.351088	0.605458
gi|347300165|ref|NP_001231397.1| proteasome subunit alpha type-4 [Sus scrofa]	1	0	-0.874778	0.782624	0.17948	0.622509
gi|335297595|ref|XP_003358072.1| PREDICTED: interferon-induced 35 kDa protein-like [Sus scrofa]	1	0	-0.504437	0.068767	0.60952	0.702344
gi|219521990|ref|NP_001137182.1| granzyme B precursor [Sus scrofa] >gi|216408333|gb|ACJ72857.1| granzyme B [Sus scrofa]	1	0	-1.4634	-0.161066	0.004595	0.703544
gi|350589959|ref|XP_003482961.1| PREDICTED: LIM domain only protein 7-like [Sus scrofa]	1	0	-0.870502	0.702176	0.399587	0.721325
gi|47523516|ref|NP_999381.1| inositol monophosphatase 1 [Sus scrofa] >gi|68568737|sp|O77591.1|IMPA1_PIG RecName: Full=Inositol monophosphatase 1; Short=IMP 1; Short=IMPase 1; AltName: Full=Inositol-1(or 4)-monophosphatase 1; AltName: Full=Lithium-sensitive myo-inositol monophos	1	0	-0.622181	0.145389	0.138594	0.758992
gi|349501107|ref|NP_001231795.1| ribosomal protein, large, P2 [Sus scrofa]	1	0	-0.738408	0.078533	0.245878	0.764093
gi|311259162|ref|XP_003127965.1| PREDICTED: far upstream element-binding protein 1 [Sus scrofa]	1	0	-1.12104	0.500035	0.069664	0.82519
gi|311252000|ref|XP_003124873.1| PREDICTED: fumarylacetoacetate hydrolase domain-containing protein 2-like isoform 2 [Sus scrofa]	1	0	-0.666263	-0.155401	-0.231404	0.828502
gi|350592546|ref|XP_001925361.4| PREDICTED: TP53-regulated inhibitor of apoptosis 1-like, partial [Sus scrofa]	1	0	-0.719612	0.593928	0.156994	0.837644
gi|350587371|ref|XP_003482396.1| PREDICTED: cytosol aminopeptidase-like [Sus scrofa]	1	0	-0.806793	-0.55494	0.345996	0.85348
gi|218664475|ref|NP_001136306.1| remodeling and spacing factor 1 [Sus scrofa] >gi|213688843|gb|ACJ53937.1| remodeling and spacing factor 1 [Sus scrofa]	1	0	-1.48448	0.600644	0.525412	0.862378
gi|350591965|ref|XP_003132730.3| PREDICTED: autophagy-related 3 isoform 2 [Sus scrofa]	1	0	-0.749299	0.270001	0.332724	0.864121
gi|51512143|gb|AAU05316.1| hepatitis B virus x interacting protein [Sus scrofa]	1	0	-0.729199	-0.381045	-0.350935	0.887683
gi|335284379|ref|XP_003354588.1| PREDICTED: dCTP pyrophosphatase 1-like [Sus scrofa]	1	0	-1.40435	0.147614	0.413325	0.904103
gi|335296241|ref|XP_003357722.1| PREDICTED: ladinin-1-like [Sus scrofa]	1	0	-0.968356	0.553623	-0.006712	0.99254
gi|253577|gb|AAB22893.1| myosin light chain isoform LC17a [swine, aorta smooth muscle, Peptide, 150 aa]	1	0	-0.792405	0.101316	-0.037701	1.11416
gi|346986418|ref|NP_001231359.1| DnaJ (Hsp40) homolog, subfamily B, member 1 [Sus scrofa]	1	0	-0.337614	-0.651165	0.005309	1.16389
gi|350594954|ref|XP_003360054.2| PREDICTED: adenosine deaminase [Sus scrofa]	1	0	-0.73257	-0.065281	0.034792	1.18319
gi|113205886|ref|NP_001038075.1|	nucleoside diphosphate kinase B [Sus scrofa] >gi|115311824|sp|Q2EN76.1|NDKB_PIG RecName: Full=Nucleoside diphosphate kinase B; Short=NDK B; Short=NDP kinase B; AltName: Full=Histidine protein kinase NDKB >gi|87047646|gb|ABD18456.1| nm23-H2 [Sus scro|113205886|ref|NP_001038075.1|	GO:0007595	GO:0004673	GO:0030027	GO:0007155	GO:0043066	GO:0004550	GO:0006241	GO:0006355	GO:0005525	GO:0005829	GO:0001726	GO:0042802	GO:0045618	GO:0003677	GO:0015949	GO:0006183	GO:0000287	GO:0006228	GO:0050679	GO:0003700	GO:0004536	GO:0043388	GO:0005886	GO:0005634	GO:0005524	GO:0005739
gi|120525|sp|P19133.1|FRIL_PIG	RecName: Full=Ferritin light chain; Short=Ferritin L subunit|120525|sp|P19133.1|FRIL_PIG	GO:0042802	GO:0006879	GO:0016491	GO:0008199	GO:0008043	GO:0006826	GO:0055114
gi|166796061|ref|NP_001107756.1|	60S ribosomal protein L5 [Sus scrofa] >gi|164598076|gb|ABY61325.1| ribosomal protein L5 [Sus scrofa]|166796061|ref|NP_001107756.1|	GO:0006413	GO:0019083	GO:0005730	GO:0006364	GO:0042273	GO:0003735	GO:0006414	GO:0005515	GO:0006415	GO:0006614	GO:0022625	GO:0000184	GO:0008097
gi|178056596|ref|NP_001116608.1|	U6 snRNA-associated Sm-like protein LSm2 [Sus scrofa] >gi|147225158|emb|CAN13335.1| LSM2 homolog, U6 small nuclear RNA associated (S. cerevisiae) [Sus scrofa]|178056596|ref|NP_001116608.1|	GO:0005829	GO:0017070	GO:0019901	GO:0046540	GO:0071013	GO:0005654	GO:0000244	GO:0043928
gi|178056623|ref|NP_001116685.1|	vesicle-associated membrane protein-associated protein B [Sus scrofa] >gi|160210890|sp|A5GFS8.1|VAPB_PIG RecName: Full=Vesicle-associated membrane protein-associated protein B; Short=VAMP-B; Short=VAMP-associated protein B; Short=VAP-B >gi|147223393|178056623|ref|NP_001116685.1|	GO:0005198	GO:0006874	GO:0016021	GO:0005789	GO:0005794	GO:0046982	GO:0006987	GO:0019048	GO:0045070	GO:0044281	GO:0008219	GO:0042803	GO:0048487	GO:0019899	GO:0006644	GO:0030148
gi|194037005|ref|XP_001928988.1|	PREDICTED: ribonuclease UK114-like isoform 1 [Sus scrofa]|194037005|ref|XP_001928988.1|	GO:0090305	GO:0004519	GO:0005777	GO:0005739	GO:0005730	GO:0009986	GO:0006449
gi|213021241|ref|NP_001132944.1|	proteasome subunit alpha type-6 [Sus scrofa] >gi|210062872|gb|ACJ06406.1| proteasome subunit alpha type 6 [Sus scrofa]|213021241|ref|NP_001132944.1|	GO:0000209	GO:0005654	GO:0006521	GO:0051437	GO:0042981	GO:0005844	GO:0016032	GO:0051436	GO:0035639	GO:0004298	GO:0005829	GO:0002479	GO:0019773	GO:0007519	GO:0000084	GO:0051059	GO:0016363	GO:0003723	GO:0000216	GO:0031145	GO:0051092	GO:0050727	GO:0016071	GO:0006977	GO:0030017	GO:0005739
gi|218664475|ref|NP_001136306.1|	remodeling and spacing factor 1 [Sus scrofa] >gi|213688843|gb|ACJ53937.1| remodeling and spacing factor 1 [Sus scrofa]|218664475|ref|NP_001136306.1|	GO:0005654	GO:0042393	GO:0006352	GO:0016584	GO:0031213	GO:0045892	GO:0043392	GO:0050434	GO:0034080	GO:0016887	GO:0045893
gi|219521990|ref|NP_001137182.1|	granzyme B precursor [Sus scrofa] >gi|216408333|gb|ACJ72857.1| granzyme B [Sus scrofa]|219521990|ref|NP_001137182.1|	GO:0019835	GO:0005829	GO:0008633	GO:0006922	GO:0005515	GO:0001772	GO:0004252	GO:0005634
gi|253577|gb|AAB22893.1|	myosin light chain isoform LC17a [swine, aorta smooth muscle, Peptide, 150 aa]|253577|gb|AAB22893.1|	GO:0007411	GO:0005829	GO:0008307	GO:0000146	GO:0005509	GO:0016461	GO:0030049	GO:0007519	GO:0030898	GO:0005515	GO:0008152
gi|264681460|ref|NP_001161124.1|	acyl carrier protein, mitochondrial [Sus scrofa] >gi|262204908|dbj|BAI48034.1| NADH dehydrogenase (ubiquinone) 1, alpha/beta subcomplex, 1, 8kDa [Sus scrofa]|264681460|ref|NP_001161124.1|	GO:0006810	GO:0031177	GO:0006633	GO:0008137	GO:0005509	GO:0005747	GO:0000036	GO:0009249	GO:0006120	GO:0005759	GO:0005504
gi|297307137|ref|NP_001171999.1|	ran-specific GTPase-activating protein [Sus scrofa]|297307137|ref|NP_001171999.1|	GO:0008536	GO:0005092	GO:0005813	GO:0007051	GO:0046907	GO:0007165	GO:0016032	GO:0005635	GO:0005096	GO:0046604
gi|297591969|ref|NP_001172062.1|	ubiquitin-conjugating enzyme E2 L3 [Sus scrofa] >gi|219563058|gb|ACL27888.1| ubiquitin-conjugating enzyme E2L 3 [Sus scrofa]|297591969|ref|NP_001172062.1|	GO:0006511	GO:0006355	GO:0070979	GO:0031625	GO:0071385	GO:0007090	GO:0004842	GO:0005524	GO:0000151	GO:0003713	GO:0008283	GO:0005737	GO:0005634
gi|297632416|ref|NP_001172092.1|	enhancer of rudimentary homolog [Sus scrofa]|297632416|ref|NP_001172092.1|	GO:0007049	GO:0042742	GO:0006213	GO:0030496
gi|297632426|ref|NP_001172096.1|	signal sequence receptor, alpha [Sus scrofa]|297632426|ref|NP_001172096.1|	GO:0006987	GO:0006412	GO:0016021	GO:0008284	GO:0006614	GO:0005789
gi|311247012|ref|XP_003122436.1|	PREDICTED: epidermal growth factor receptor kinase substrate 8-like protein 2-like [Sus scrofa]|311247012|ref|XP_003122436.1|	GO:0016601	GO:0005737	GO:0001726	GO:0051015	GO:0005886
gi|311247240|ref|XP_003122553.1|	PREDICTED: splicing factor 3B subunit 2 [Sus scrofa]|311247240|ref|XP_003122553.1|	GO:0005730	GO:0005654	GO:0000398	GO:0005515	GO:0005689	GO:0071013
gi|311247353|ref|XP_003122594.1|	PREDICTED: N-acetylated alpha-linked acidic dipeptidase-like 1 [Sus scrofa]|311247353|ref|XP_003122594.1|	GO:0046872	GO:0016021	GO:0016324	GO:0008237	GO:0016805	GO:0006508	GO:0004180
gi|311248247|ref|XP_003123039.1|	PREDICTED: ATP synthase subunit delta, mitochondrial-like isoform 1 [Sus scrofa]|311248247|ref|XP_003123039.1|	GO:0046961	GO:0005759	GO:0006172	GO:0046933	GO:0042776	GO:0043531	GO:0006119	GO:0042777	GO:0046688	GO:0032403	GO:0000275	GO:0006200	GO:0005886	GO:0005524	GO:0022904
gi|311252000|ref|XP_003124873.1|	PREDICTED: fumarylacetoacetate hydrolase domain-containing protein 2-like isoform 2 [Sus scrofa]|311252000|ref|XP_003124873.1|	GO:0046872	GO:0008152	GO:0016787	GO:0005739
gi|311254317|ref|XP_001927973.2|	PREDICTED: cingulin-like [Sus scrofa]|311254317|ref|XP_001927973.2|	GO:0005923	GO:0003779	GO:0016459	GO:0003774	GO:0007179
gi|311259162|ref|XP_003127965.1|	PREDICTED: far upstream element-binding protein 1 [Sus scrofa]|311259162|ref|XP_003127965.1|	GO:0005730	GO:0003700	GO:0003723	GO:0003697	GO:0010628	GO:0006366
gi|311260243|ref|XP_001927987.2|	PREDICTED: protein CutA isoform 1 [Sus scrofa]|311260243|ref|XP_001927987.2|	GO:0051260	GO:0016020	GO:0008104	GO:0010038	GO:0019899
gi|311260957|ref|XP_003128592.1|	PREDICTED: NEDD8-like [Sus scrofa]|311260957|ref|XP_003128592.1|	GO:0006511	GO:0006357	GO:0031625	GO:0045116	GO:0014070	GO:0009653	GO:0008104	GO:0005634
gi|311270597|ref|XP_003132922.1|	PREDICTED: 26S proteasome non-ATPase regulatory subunit 9-like [Sus scrofa]|311270597|ref|XP_003132922.1|	GO:0000209	GO:0005654	GO:0006521	GO:0051437	GO:0042981	GO:0016032	GO:0051436	GO:0046676	GO:0005829	GO:0002479	GO:0003713	GO:0000084	GO:0070682	GO:0008540	GO:0000216	GO:0031145	GO:0045893	GO:0016071	GO:0032024	GO:0043425	GO:0006977
gi|311272290|ref|XP_003133380.1|	PREDICTED: CDKN2A-interacting protein isoform 1 [Sus scrofa]|311272290|ref|XP_003133380.1|	GO:0009967	GO:0002039	GO:0030308	GO:0031647	GO:0001652	GO:0005654
gi|311274576|ref|XP_003134384.1|	PREDICTED: small nuclear ribonucleoprotein-associated protein B~-like [Sus scrofa]|311274576|ref|XP_003134384.1|	GO:0005829	GO:0006369	GO:0071208	GO:0005683	GO:0042802	GO:0000387	GO:0071204	GO:0008334	GO:0034660	GO:0071013	GO:0005654	GO:0005689
gi|311274849|ref|XP_001925742.2|	PREDICTED: regulation of nuclear pre-mRNA domain-containing protein 1B [Sus scrofa]|311274849|ref|XP_001925742.2|	GO:0010564	GO:0045944	GO:0016591	GO:0000993	GO:0070940	GO:0008284
gi|335282345|ref|XP_003354038.1|	PREDICTED: mitochondrial import inner membrane translocase subunit Tim13-like [Sus scrofa]|335282345|ref|XP_003354038.1|	GO:0072321	GO:0044267	GO:0008270	GO:0005743	GO:0045039	GO:0042719	GO:0007605
gi|335283403|ref|XP_003123930.2|	PREDICTED: lamin-B1 [Sus scrofa]|335283403|ref|XP_003123930.2|	GO:0005654	GO:0005198	GO:0006921	GO:0005637	GO:0031662	GO:0043274	GO:0008432	GO:0005638	GO:0016363	GO:0046330
gi|335284379|ref|XP_003354588.1|	PREDICTED: dCTP pyrophosphatase 1-like [Sus scrofa]|335284379|ref|XP_003354588.1|	GO:0032556	GO:0047840	GO:0000287	GO:0009143	GO:0005829	GO:0051289
gi|335285134|ref|XP_003354782.1|	PREDICTED: charged multivesicular body protein 3-like isoform 2 [Sus scrofa]|335285134|ref|XP_003354782.1|	GO:0051036	GO:0008333	GO:0005769	GO:0016044	GO:0005515	GO:0000910	GO:0030496	GO:0007049	GO:0000815	GO:0031902	GO:0005829	GO:0006915	GO:0015031	GO:0005546
gi|335286637|ref|XP_001927783.3|	PREDICTED: nitrilase homolog 1 isoform 2 [Sus scrofa]|335286637|ref|XP_001927783.3|	GO:0006807	GO:0000257	GO:0005739
gi|335286747|ref|XP_001924678.3|	PREDICTED: hepatoma-derived growth factor-like [Sus scrofa]|335286747|ref|XP_001924678.3|	GO:0005654	GO:0008083	GO:0000166	GO:0006355	GO:0008283	GO:0005615	GO:0005737	GO:0008201	GO:0006987	GO:0003677
gi|335287650|ref|XP_003126108.2|	PREDICTED: TRIO and F-actin-binding protein [Sus scrofa]|335287650|ref|XP_003126108.2|	GO:0051016	GO:0045159	GO:0005543	GO:0031625	GO:0017049	GO:0030047	GO:0003779	GO:0015629	GO:0005737	GO:0005634
gi|335292522|ref|XP_001924480.2|	PREDICTED: proteasome subunit beta type-5 [Sus scrofa]|335292522|ref|XP_001924480.2|	GO:0000209	GO:0005654	GO:0005515	GO:0006521	GO:0051437	GO:0042981	GO:0010467	GO:0051436	GO:0004298	GO:0005839	GO:0005829	GO:0002479	GO:0019048	GO:0000084	GO:0000216	GO:0031145	GO:0016071	GO:0006979	GO:0006977
gi|335293128|ref|XP_003128866.2|	PREDICTED: alpha-adducin [Sus scrofa]|335293128|ref|XP_003128866.2|	GO:0030507	GO:0032092	GO:0005198	GO:0006921	GO:0048873	GO:0006884	GO:0051017	GO:0045766	GO:0000902	GO:0005829	GO:0046982	GO:0046872	GO:0071300	GO:0006987	GO:0030218	GO:0008290	GO:0014069	GO:0051015	GO:0006811	GO:0020027	GO:0042608	GO:0045807	GO:0048471	GO:0042803	GO:0035264	GO:0005886	GO:0005516	GO:0008134	GO:0005634	GO:0051016	GO:0001701
gi|335293690|ref|XP_003129163.2|	PREDICTED: general vesicular transport factor p115-like [Sus scrofa]|335293690|ref|XP_003129163.2|	GO:0000139	GO:0045056	GO:0048280	GO:0008565	GO:0006886	GO:0005829	GO:0048471
gi|335296241|ref|XP_003357722.1|	PREDICTED: ladinin-1-like [Sus scrofa]|335296241|ref|XP_003357722.1|	GO:0005198	GO:0015629
gi|335297595|ref|XP_003358072.1|	PREDICTED: interferon-induced 35 kDa protein-like [Sus scrofa]|335297595|ref|XP_003358072.1|	GO:0005515	GO:0060337	GO:0005634	GO:0005829	GO:0009615
gi|335298830|ref|XP_001925616.3|	PREDICTED: golgin subfamily A member 4 [Sus scrofa]|335298830|ref|XP_001925616.3|	GO:0000042
gi|335309460|ref|XP_003361646.1|	PREDICTED: nucleolar protein 56-like, partial [Sus scrofa]|335309460|ref|XP_003361646.1|	GO:0031428	GO:0030515	GO:0005515	GO:0006364	GO:0070761
gi|335309593|ref|XP_003361696.1|	PREDICTED: 39S ribosomal protein L12, mitochondrial-like, partial [Sus scrofa]|335309593|ref|XP_003361696.1|	GO:0006412	GO:0005762	GO:0003735	GO:0006390	GO:0045893
gi|335309807|ref|XP_003361778.1|	PREDICTED: delta-aminolevulinic acid dehydratase-like, partial [Sus scrofa]|335309807|ref|XP_003361778.1|	GO:0042802	GO:0032791	GO:0044281	GO:0006782	GO:0051260	GO:0005829	GO:0008270	GO:0004655
gi|343403848|ref|NP_001230297.1|	phosphopantothenoylcysteine decarboxylase [Sus scrofa]|343403848|ref|NP_001230297.1|	GO:0015939	GO:0015937	GO:0005829	GO:0004633
gi|343790906|ref|NP_001230510.1|	calcineurin-like phosphoesterase domain containing 1 [Sus scrofa]|343790906|ref|NP_001230510.1|	GO:0016787	GO:0046872
gi|345091084|ref|NP_001230758.1|	RNA binding motif protein 25 [Sus scrofa]|345091084|ref|NP_001230758.1|	GO:0003729	GO:0005730	GO:0006915	GO:0016607	GO:0000381	GO:0005515	GO:0000166	GO:0005737
gi|346644866|ref|NP_001231105.1|	coiled-coil-helix-coiled-coil-helix domain-containing protein 3, mitochondrial [Sus scrofa]|346644866|ref|NP_001231105.1|	GO:0019902	GO:0008053	GO:0005743	GO:0032947	GO:0007007
gi|346644882|ref|NP_001231113.1|	reticulocalbin 2, EF-hand calcium binding domain precursor [Sus scrofa]|346644882|ref|NP_001231113.1|	GO:0005509	GO:0005788
gi|346986418|ref|NP_001231359.1|	DnaJ (Hsp40) homolog, subfamily B, member 1 [Sus scrofa]|346986418|ref|NP_001231359.1|	GO:0005737	GO:0005730	GO:0031072	GO:0051085	GO:0006986	GO:0070389	GO:0051082
gi|346986456|ref|NP_001231378.1|	nucleoside diphosphate kinase 3 isoform 1 precursor [Sus scrofa]|346986456|ref|NP_001231378.1|	GO:0006165	GO:0004550	GO:0006917	GO:0005739	GO:0046872	GO:0006228	GO:0005524	GO:0006183	GO:0006241
gi|346986466|ref|NP_001231384.1|	proteasome (prosome, macropain) subunit, beta type, 4 [Sus scrofa]|346986466|ref|NP_001231384.1|	GO:0000209	GO:0005654	GO:0006521	GO:0051437	GO:0042981	GO:0010467	GO:0051436	GO:0004298	GO:0005839	GO:0002862	GO:0005829	GO:0002479	GO:0001530	GO:0019048	GO:0000084	GO:0000216	GO:0031145	GO:0016071	GO:0006977
gi|347300165|ref|NP_001231397.1|	proteasome subunit alpha type-4 [Sus scrofa]|347300165|ref|NP_001231397.1|	GO:0000209	GO:0005654	GO:0005515	GO:0006521	GO:0051437	GO:0042981	GO:0010467	GO:0051436	GO:0004298	GO:0005829	GO:0002479	GO:0019773	GO:0019048	GO:0000084	GO:0000216	GO:0031145	GO:0016071	GO:0006977
gi|347543795|ref|NP_001231558.1|	phospholipase B-like 1 precursor [Sus scrofa]|347543795|ref|NP_001231558.1|	GO:0046474	GO:0036151	GO:0016042	GO:0036149	GO:0036152	GO:0016787	GO:0005576	GO:0005829
gi|347582660|ref|NP_001231584.1|	mesencephalic astrocyte-derived neurotrophic factor precursor [Sus scrofa] >gi|350591263|ref|XP_003483237.1| PREDICTED: mesencephalic astrocyte-derived neurotrophic factor [Sus scrofa] >gi|306563669|gb|ADN03186.1| mesencephalic astrocyte-derived neu|347582660|ref|NP_001231584.1|	GO:0002014	GO:0005615	GO:0008083	GO:0006986	GO:0005783	GO:0048471
gi|347658999|ref|NP_001231625.1|	uncharacterized protein LOC100512671 [Sus scrofa]|347658999|ref|NP_001231625.1|	GO:0046872	GO:0016787	GO:0005634	GO:0005515
gi|347922148|ref|NP_001231673.1|	charged multivesicular body protein 5 [Sus scrofa]|347922148|ref|NP_001231673.1|	GO:0005768	GO:0008333	GO:0016044	GO:0005515	GO:0007040	GO:0016020	GO:0005634	GO:0005829	GO:0001919	GO:0015031
gi|348605151|ref|NP_001231720.1|	hydroxysteroid (17-beta) dehydrogenase 3 [Sus scrofa]|348605151|ref|NP_001231720.1|	GO:0005829	GO:0043525	GO:0070389	GO:0005739	GO:0045944	GO:0051087	GO:0045111	GO:0006916	GO:0005057	GO:0007166	GO:0035094	GO:0051219	GO:0048471	GO:0042493	GO:0010226	GO:0006950	GO:0030182	GO:0005634
gi|349501107|ref|NP_001231795.1|	ribosomal protein, large, P2 [Sus scrofa]|349501107|ref|NP_001231795.1|	GO:0006413	GO:0019083	GO:0003723	GO:0003735	GO:0006414	GO:0006415	GO:0006614	GO:0022625	GO:0000184
gi|350529387|ref|NP_001231927.1|	basic transcription factor 3 [Sus scrofa]|350529387|ref|NP_001231927.1|	GO:0001701	GO:0005515	GO:0016021	GO:0005634	GO:0006366	GO:0006355
gi|350579011|ref|XP_003121807.3|	PREDICTED: acidic leucine-rich nuclear phosphoprotein 32 family member A-like [Sus scrofa]|350579011|ref|XP_003121807.3|	GO:0016363	GO:0035556	GO:0006355	GO:0008022	GO:0016071	GO:0006913	GO:0050839	GO:0048471	GO:0005654	GO:0005783
gi|350580630|ref|XP_003123158.3|	PREDICTED: far upstream element-binding protein 2-like [Sus scrofa]|350580630|ref|XP_003123158.3|	GO:0003730	GO:0005829	GO:0010494	GO:0005730	GO:0000375	GO:0030425	GO:0016071	GO:0005515	GO:0043025	GO:0006351	GO:0005654
gi|350580713|ref|XP_003480884.1|	PREDICTED: hypothetical protein LOC100737370 [Sus scrofa]|350580713|ref|XP_003480884.1|	GO:0016021
gi|350581149|ref|XP_003480971.1|	PREDICTED: matrin-3 [Sus scrofa] >gi|350581147|ref|XP_003480970.1| PREDICTED: matrin-3 [Sus scrofa] >gi|335283551|ref|XP_003354341.1| PREDICTED: matrin-3 [Sus scrofa] >gi|311250254|ref|XP_003124025.1| PREDICTED: matrin-3 isoform 1 [Sus scrofa]|350581149|ref|XP_003480971.1|	GO:0005730	GO:0003723	GO:0005515	GO:0016363	GO:0008270	GO:0005637	GO:0000166	GO:0005198
gi|350582270|ref|XP_003125088.3|	PREDICTED: zinc finger protein 638-like [Sus scrofa]|350582270|ref|XP_003125088.3|	GO:0003723	GO:0003690	GO:0008270	GO:0005730	GO:0006355	GO:0016607	GO:0008380	GO:0000166	GO:0005737
gi|350583507|ref|XP_003481532.1|	PREDICTED: cold shock domain-containing protein E1-like [Sus scrofa]|350583507|ref|XP_003481532.1|	GO:0003723	GO:0005743	GO:0006355	GO:0008584	GO:0003677
gi|350583750|ref|XP_003481579.1|	PREDICTED: hsc70-interacting protein-like isoform 1 [Sus scrofa]|350583750|ref|XP_003481579.1|	GO:0030674	GO:0042026	GO:0005737
gi|350583843|ref|XP_003126114.3|	PREDICTED: myosin-9 [Sus scrofa]|350583843|ref|XP_003126114.3|	GO:0030220	GO:0042803	GO:0032796	GO:0000212	GO:0005826	GO:0000146	GO:0030048	GO:0001701	GO:0007411	GO:0001772	GO:0051295	GO:0031532	GO:0016337	GO:0031594	GO:0030898	GO:0005829	GO:0015031	GO:0043495	GO:0006200	GO:0016460	GO:0006509	GO:0001768	GO:0030863	GO:0043534	GO:0007520	GO:0001931	GO:0050900	GO:0007132	GO:0008180	GO:0032154	GO:0000910	GO:0005913	GO:0005524	GO:0001725	GO:0005819	GO:0030224	GO:0005516	GO:0007229	GO:0001525	GO:0051015	GO:0008360	GO:0043531	GO:0008305	GO:0001726	GO:0038032
gi|350583937|ref|XP_003355432.2|	PREDICTED: LIM domain and actin-binding protein 1-like [Sus scrofa]|350583937|ref|XP_003355432.2|	GO:0003785	GO:0051017	GO:0051015	GO:0001725	GO:0030835	GO:0005925	GO:0005737	GO:0031529
gi|350587371|ref|XP_003482396.1|	PREDICTED: cytosol aminopeptidase-like [Sus scrofa]|350587371|ref|XP_003482396.1|	GO:0005730	GO:0030145	GO:0008235	GO:0004177	GO:0000287	GO:0006508	GO:0008270	GO:0005739
gi|350589959|ref|XP_003482961.1|	PREDICTED: LIM domain only protein 7-like [Sus scrofa]|350589959|ref|XP_003482961.1|	GO:0005737	GO:0016567	GO:0004842	GO:0005634	GO:0000151
gi|350590115|ref|XP_003131204.3|	PREDICTED: RING finger protein 213-like, partial [Sus scrofa]|350590115|ref|XP_003131204.3|	GO:0005488	GO:0006200	GO:0004842	GO:0016887	GO:0051865	GO:0005737
gi|350590718|ref|XP_003131850.3|	PREDICTED: bleomycin hydrolase-like [Sus scrofa]|350590718|ref|XP_003131850.3|	GO:0009636	GO:0004180	GO:0042493	GO:0005515	GO:0000209	GO:0004177	GO:0002474	GO:0004197	GO:0006508	GO:0005634	GO:0005829
gi|350591288|ref|XP_003483241.1|	PREDICTED: filamin-B [Sus scrofa]|350591288|ref|XP_003483241.1|	GO:0003779
gi|350591965|ref|XP_003132730.3|	PREDICTED: autophagy-related 3 isoform 2 [Sus scrofa]|350591965|ref|XP_003132730.3|	GO:0005829	GO:0000153	GO:0043653	GO:0000045	GO:0019776	GO:0019899	GO:0016567	GO:0006612	GO:0019777
gi|350592546|ref|XP_001925361.4|	PREDICTED: TP53-regulated inhibitor of apoptosis 1-like, partial [Sus scrofa]|350592546|ref|XP_001925361.4|	GO:0043154	GO:0006977	GO:0005739	GO:0006916	GO:0043027	GO:0005515	GO:0048471	GO:0048793
gi|350594669|ref|XP_001926037.4|	PREDICTED: ribosome-binding protein 1 [Sus scrofa]|350594669|ref|XP_001926037.4|	GO:0004872	GO:0030176	GO:0005840	GO:0006810	GO:0007165	GO:0006412
gi|350594954|ref|XP_003360054.2|	PREDICTED: adenosine deaminase [Sus scrofa]|350594954|ref|XP_003360054.2|	GO:0060169	GO:0050862	GO:0050728	GO:0033089	GO:0006154	GO:0046061	GO:0070256	GO:0002636	GO:0005764	GO:0002906	GO:0033632	GO:0001821	GO:0048541	GO:0042542	GO:0001829	GO:0005829	GO:0009168	GO:0002314	GO:0046103	GO:0043103	GO:0001889	GO:0005615	GO:0032839	GO:0046111	GO:0030054	GO:0002686	GO:0048566	GO:0001666	GO:0050850	GO:0010460	GO:0030890	GO:0004000	GO:0007568	GO:0060407	GO:0008270	GO:0005515	GO:0001890	GO:0009897	GO:0070244	GO:0001883	GO:0046638	GO:0045987	GO:0032261	GO:0043278	GO:0042323	GO:0048286	GO:0043025	GO:0006157
gi|350597032|ref|XP_001925921.4|	PREDICTED: aldehyde dehydrogenase family 1 member A3, partial [Sus scrofa]|350597032|ref|XP_001925921.4|	GO:0004030	GO:0002072	GO:0004028	GO:0070324	GO:0001822	GO:0070403	GO:0048386	GO:0021983	GO:0042572	GO:0060324	GO:0005829	GO:0002138	GO:0043065	GO:0004029	GO:0021768	GO:0001758	GO:0042493	GO:0042574	GO:0055114	GO:0042803	GO:0060166
gi|356461003|ref|NP_001238977.1|	RNA-binding protein EWS [Sus scrofa] >gi|351738726|gb|AEQ61463.1| EWS [Sus scrofa]|356461003|ref|NP_001238977.1|	GO:0005622	GO:0005515	GO:1901363	GO:0097159
gi|47522692|ref|NP_999062.1|	long-chain specific acyl-CoA dehydrogenase, mitochondrial precursor [Sus scrofa] >gi|2829676|sp|P79274.1|ACADL_PIG RecName: Full=Long-chain specific acyl-CoA dehydrogenase, mitochondrial; Short=LCAD; Flags: Precursor >gi|1695729|dbj|BAA13965.1| long|47522692|ref|NP_999062.1|	GO:0042758	GO:0000062	GO:0001659	GO:0046322	GO:0016401	GO:0031966	GO:0090181	GO:0033539	GO:0042413	GO:0004466	GO:0045717	GO:0050660	GO:0005759	GO:0019254	GO:0051289
gi|47522814|ref|NP_999159.1|	dihydrolipoyllysine-residue acetyltransferase component of pyruvate dehydrogenase complex, mitochondrial precursor [Sus scrofa] >gi|14587786|dbj|BAB61720.1| dihydrolipoamide acetyltransferase [Sus scrofa]|47522814|ref|NP_999159.1|	GO:0004742	GO:0005515	GO:0006096	GO:0005967	GO:0010510	GO:0030431
gi|47523516|ref|NP_999381.1|	inositol monophosphatase 1 [Sus scrofa] >gi|68568737|sp|O77591.1|IMPA1_PIG RecName: Full=Inositol monophosphatase 1; Short=IMP 1; Short=IMPase 1; AltName: Full=Inositol-1(or 4)-monophosphatase 1; AltName: Full=Lithium-sensitive myo-inositol monophos|47523516|ref|NP_999381.1|	GO:0046855	GO:0030424	GO:0005739	GO:0005730	GO:0046872	GO:0052833	GO:0006021	GO:0052832	GO:0006661	GO:0008934	GO:0046854	GO:0043025	GO:0007165	GO:0042803	GO:0010226
gi|47523730|ref|NP_999500.1|	tropomyosin alpha-4 chain [Sus scrofa] >gi|54039746|sp|P67937.3|TPM4_PIG RecName: Full=Tropomyosin alpha-4 chain; AltName: Full=Tropomyosin-4 >gi|3661527|gb|AAC61744.1| tropomyosin 4 [Sus scrofa] >gi|262263207|dbj|BAI48106.1| tropomyosin 4 [Sus scro|47523730|ref|NP_999500.1|	GO:0006979	GO:0005829	GO:0030863	GO:0008307	GO:0046872	GO:0002102	GO:0030049	GO:0055003	GO:0001725	GO:0005862	GO:0031941	GO:0060048
gi|51512143|gb|AAU05316.1|	hepatitis B virus x interacting protein [Sus scrofa]|51512143|gb|AAU05316.1|	GO:0019079	GO:0043154	GO:0005515	GO:0006916	GO:0005829	GO:0009615
gi|68532157|gb|AAY98813.1|	proteasome subunit 10 [Sus scrofa] >gi|68532159|gb|AAY98814.1| proteasome subunit 10 [Sus scrofa]|68532157|gb|AAY98813.1|	GO:0000209	GO:0005654	GO:0006521	GO:0051437	GO:0042981	GO:0010467	GO:0006959	GO:0000902	GO:0051436	GO:0004298	GO:0005839	GO:0005829	GO:0002479	GO:0019048	GO:0000084	GO:0000216	GO:0031145	GO:0016071	GO:0006977	GO:0042098
gi|83816981|ref|NP_001033050.1|	proteasome subunit beta type-9 [Sus scrofa] >gi|311260176|ref|XP_003128374.1| PREDICTED: proteasome subunit beta type-9-like [Sus scrofa] >gi|110276961|gb|ABG57117.1| proteasome beta 9 subunit [Sus scrofa] >gi|83320492|gb|ABC02872.1| proteasome beta|83816981|ref|NP_001033050.1|	GO:0000209	GO:0005654	GO:0005515	GO:0006521	GO:0051437	GO:0042981	GO:0010467	GO:0016032	GO:0051436	GO:0004298	GO:0005839	GO:0005829	GO:0002479	GO:0000084	GO:0000216	GO:0031145	GO:0016071	GO:0006977
gi|83921643|ref|NP_001033096.1|	serine/arginine-rich splicing factor 1 [Sus scrofa] >gi|114152157|sp|Q3YLA6.3|SRSF1_PIG RecName: Full=Serine/arginine-rich splicing factor 1; AltName: Full=Splicing factor, arginine/serine-rich 1 >gi|73810231|gb|AAZ86089.1| splicing factor arginine/|83921643|ref|NP_001033096.1|	GO:0003723	GO:0006369	GO:0000395	GO:0050733	GO:0016607	GO:0031124	GO:0006406	GO:0071013	GO:0001701	GO:0060048
[truncated: 1 more columns]

## Sheet: bin 6
Gene	GWEIGHT	114	115	116	117	118
EWEIGHT		1	1	1	1	1
gi|226533693|ref|NP_001152779.1| bactericidal permeability-increasing protein precursor [Sus scrofa] >gi|225922170|gb|ACO37155.1| bactericidal/permeability increasing protein [Sus scrofa]	1	0	0.877107	0.456789	0.167413	-1.21917
gi|346716348|ref|NP_001231189.1| arginine--tRNA ligase, cytoplasmic [Sus scrofa]	1	0	1.01699	0.432031	-0.027612	-1.04397
gi|194043292|ref|XP_001928111.1| PREDICTED: 14-3-3 protein eta [Sus scrofa]	1	0	0.904509	0.283193	-0.164423	-0.948433
gi|311275457|ref|XP_003134747.1| PREDICTED: filamin-C isoform 1 [Sus scrofa]	1	0	0.184614	0.285402	0.142241	-0.939588
gi|335302965|ref|XP_001925033.2| PREDICTED: lupus La protein homolog [Sus scrofa]	1	0	0.659627	0.260921	0.082663	-0.907117
gi|346644874|ref|NP_001231109.1| T-complex protein 1 subunit gamma [Sus scrofa]	1	0	0.68987	0.071893	-0.027643	-0.896398
gi|297591965|ref|NP_001172061.1| leukotriene A-4 hydrolase [Sus scrofa] >gi|262204898|dbj|BAI48029.1| leukotriene A4 hydrolase [Sus scrofa]	1	0	0.50183	0.080654	-0.17257	-0.862053
gi|45268975|gb|AAS55900.1| 60S ribosomal protein L11, partial [Sus scrofa]	1	0	0.21521	0.099147	0.093692	-0.848463
gi|113205898|ref|NP_001038078.1| microtubule-associated protein RP/EB family member 1 [Sus scrofa] >gi|81174752|gb|ABB58918.1| microtubule-associated protein RP/EB family member 1 [Sus scrofa]	1	0	0.806563	0.360927	-0.016722	-0.840994
gi|153792600|ref|NP_001093400.1| fatty acid synthase [Sus scrofa] >gi|148733529|gb|ABR09275.1| fatty acid synthase [Sus scrofa]	1	0	0.404728	-0.060607	0.387381	-0.811928
gi|125151|sp|P00571.1|KAD1_PIG RecName: Full=Adenylate kinase isoenzyme 1; Short=AK 1; AltName: Full=ATP-AMP transphosphorylase 1; AltName: Full=Myokinase >gi|350579686|ref|XP_003122225.3| PREDICTED: adenylate kinase isoenzyme 1 isoform 1 [Sus scrofa] >gi|229498|prf||742496A kina	1	0	1.05076	-0.509609	0.003863	-0.79964
gi|304365440|ref|NP_001182048.1| protein disulfide-isomerase A6 precursor [Sus scrofa] >gi|301016767|dbj|BAJ11758.1| protein disulfide isomerase P5 [Sus scrofa]	1	0	0.439484	0.299163	0.223528	-0.797053
gi|346986322|ref|NP_001231315.1| peptidyl-prolyl cis-trans isomerase D [Sus scrofa]	1	0	0.210395	0.104175	-0.086157	-0.79262
gi|84028320|sp|Q9GKX6.1|GALM_PIG RecName: Full=Aldose 1-epimerase; AltName: Full=Galactose mutarotase >gi|47523866|ref|NP_999571.1| aldose 1-epimerase [Sus scrofa] >gi|11611545|dbj|BAB18973.1| aldose 1-epimerase [Sus scrofa]	1	0	0.896869	0.054372	0.230869	-0.788496
gi|47522786|ref|NP_999145.1| UTP--glucose-1-phosphate uridylyltransferase [Sus scrofa] >gi|6136110|sp|P79303.3|UGPA_PIG RecName: Full=UTP--glucose-1-phosphate uridylyltransferase; AltName: Full=UDP-glucose pyrophosphorylase; Short=UDPGP; Short=UGPase >gi|1752677|emb|CAA67690.1|	1	0	0.372582	-0.199409	0.047785	-0.778958
gi|311247536|ref|XP_003122689.1| PREDICTED: bifunctional ATP-dependent dihydroxyacetone kinase/FAD-AMP lyase (cyclizing)-like [Sus scrofa]	1	0	0.936463	-0.098342	-0.184757	-0.778653
gi|130759|sp|P23687.1|PPCE_PIG RecName: Full=Prolyl endopeptidase; Short=PE; AltName: Full=Post-proline cleaving enzyme >gi|51592147|ref|NP_001004050.1| prolyl endopeptidase [Sus scrofa] >gi|387766256|pdb|4AN1|A Chain A, Prolyl Oligopeptidase From Porcine Brain With A Covalently	1	0	0.470694	0.157434	0.185046	-0.778496
gi|346986428|ref|NP_001231362.1| heat shock 90kD protein 1, beta [Sus scrofa]	1	0	0.083221	0.0797	-0.018745	-0.762434
gi|342187276|ref|NP_001230112.1| AP-2 complex subunit beta [Sus scrofa]	1	0	0.629776	-0.217453	0.824498	-0.761582
gi|299728|gb|AAB26300.1| guanylate kinase, ATP:GMP-phospho-transferase {EC 2.7.4.8} [swine, brain, Peptide, 197 aa]	1	0	1.14443	0.145256	0.014481	-0.748534
gi|346421386|ref|NP_001231066.1| ATP synthase subunit g, mitochondrial [Sus scrofa]	1	0	0.682342	0.118544	0.013245	-0.747777
gi|45269041|gb|AAS55933.1| 40S ribosomal protein S3a, partial [Sus scrofa]	1	0	0.707786	-0.53428	0.837689	-0.733943
gi|462384|sp|P33198.1|IDHP_PIG RecName: Full=Isocitrate dehydrogenase [NADP], mitochondrial; Short=IDH; AltName: Full=ICD-M; AltName: Full=IDP; AltName: Full=NADP(+)-specific ICDH; AltName: Full=Oxalosuccinate decarboxylase; Flags: Precursor >gi|294223|gb|AAA31089.1| NADPH-specif	1	0	0.595669	-0.01621	-0.008082	-0.732272
gi|335296662|ref|XP_003130891.2| PREDICTED: 6-phosphofructokinase type C [Sus scrofa]	1	0	0.744294	-0.384581	0.027537	-0.73168
gi|345110630|ref|NP_001230796.1| RuvB-like 2 [Sus scrofa]	1	0	-0.14969	0.238932	0.531269	-0.729223
gi|312283580|ref|NP_999292.2| superoxide dismutase [Mn], mitochondrial [Sus scrofa]	1	0	0.042297	0.774624	0.870344	-0.701633
gi|268370269|ref|NP_001161307.1| cytochrome P450 2C42 precursor [Sus scrofa]	1	0	1.32398	-0.172277	0.423559	-0.690432
gi|311254554|ref|XP_003125887.1| PREDICTED: bcl-2-like protein 15-like [Sus scrofa]	1	0	0.85109	0.075179	0.142756	-0.687104
gi|116047849|gb|ABJ53147.1| glutathione S-transferase mu 2 [Sus scrofa]	1	0	0.362347	-0.209391	0.013997	-0.680485
gi|1921|emb|CAA33169.1| unnamed protein product [Sus scrofa]	1	0	0.82833	0.418521	0.022153	-0.67863
gi|335306989|ref|XP_003130411.2| PREDICTED: ATP-dependent RNA helicase A-like [Sus scrofa]	1	0	0.002769	-0.221238	0.156155	-0.661811
gi|335309657|ref|XP_003361720.1| PREDICTED: 14-3-3 protein epsilon-like [Sus scrofa]	1	0	0.599652	0.429205	-0.101571	-0.657964
gi|350582932|ref|XP_003125549.2| PREDICTED: annexin A13 isoform 2 [Sus scrofa]	1	0	0.016249	0.326589	0.077265	-0.653078
gi|148237564|ref|NP_001090977.1| adenylosuccinate synthetase isozyme 2 [Sus scrofa] >gi|189031715|sp|A4Z6H1.1|PURA2_PIG RecName: Full=Adenylosuccinate synthetase isozyme 2; Short=AMPSase 2; Short=AdSS 2; AltName: Full=Adenylosuccinate synthetase, acidic isozyme; AltName: Full=Adeny	1	0	0.223945	0.316638	-0.17654	-0.65252
gi|350592835|ref|XP_003483550.1| PREDICTED: protein transport protein Sec24C isoform 2 [Sus scrofa]	1	0	0.755604	0.449244	-0.138993	-0.646557
gi|359807141|ref|NP_001240850.1| mannose-6-phosphate isomerase [Sus scrofa]	1	0	0.779346	-0.568356	0.154298	-0.63488
gi|350585922|ref|XP_003127872.3| PREDICTED: adenylyl cyclase-associated protein 1, partial [Sus scrofa]	1	0	0.159632	0.491443	-0.005285	-0.631873
gi|305855148|ref|NP_001182266.1| peptidyl-prolyl cis-trans isomerase FKBP4 [Sus scrofa] >gi|285818414|gb|ADC38880.1| FK506 binding protein 4 [Sus scrofa]	1	0	-0.136015	-0.076467	0.231483	-0.630354
gi|311247118|ref|XP_003122486.1| PREDICTED: NADH dehydrogenase [ubiquinone] flavoprotein 1, mitochondrial-like isoform 1 [Sus scrofa]	1	0	0.3937	-0.084742	-0.061822	-0.622979
gi|47522608|ref|NP_999106.1| dolichyl-diphosphooligosaccharide--protein glycosyltransferase subunit 2 precursor [Sus scrofa] >gi|75056105|sp|Q9GL01.1|RPN2_PIG RecName: Full=Dolichyl-diphosphooligosaccharide--protein glycosyltransferase subunit 2; AltName: Full=Dolichyl-diphosph	1	0	0.081743	-0.155241	-0.001618	-0.613548
gi|350594745|ref|XP_003483965.1| PREDICTED: inosine triphosphate pyrophosphatase-like [Sus scrofa]	1	0	0.178626	0.034716	0.196773	-0.59846
gi|335289328|ref|XP_003355850.1| PREDICTED: ubiquinone biosynthesis protein COQ9, mitochondrial-like [Sus scrofa]	1	0	0.655665	-0.043777	-0.325076	-0.596688
gi|194035204|ref|XP_001928235.1| PREDICTED: 5~-nucleotidase domain-containing protein 1 [Sus scrofa]	1	0	0.470158	0.149444	0.306776	-0.596447
gi|347800709|ref|NP_001231660.1| scinderin [Sus scrofa]	1	0	0.327817	-0.285888	0.007744	-0.595092
gi|138753471|emb|CAM59483.1| tyrosine 3-monooxygenase/tryptophan 5-monooxygenase activation protein, theta polypeptide [Sus scrofa]	1	0	0.569941	-0.062464	-0.428687	-0.591089
gi|335297524|ref|XP_003358060.1| PREDICTED: 116 kDa U5 small nuclear ribonucleoprotein component [Sus scrofa] >gi|311267074|ref|XP_003131380.1| PREDICTED: 116 kDa U5 small nuclear ribonucleoprotein component isoform 1 [Sus scrofa]	1	0	0.362787	-0.031622	0.10188	-0.590839
gi|311249343|ref|XP_003123584.1| PREDICTED: coatomer subunit epsilon-like isoform 1 [Sus scrofa]	1	0	0.554031	-0.257798	0.425655	-0.562191
gi|1900|emb|CAA27575.1| unnamed protein product [Sus scrofa]	1	0	0.601868	0.48426	0.087103	-0.546703
gi|311254260|ref|XP_001929592.2| PREDICTED: interleukin enhancer-binding factor 2 [Sus scrofa]	1	0	0.360551	0.091848	0.002016	-0.545161
gi|350587465|ref|XP_003128987.3| PREDICTED: RNA-binding protein 47-like isoform 1 [Sus scrofa]	1	0	0.975675	0.170946	0.269529	-0.539733
gi|335310888|ref|XP_003362240.1| PREDICTED: importin subunit alpha-4-like, partial [Sus scrofa]	1	0	1.03242	0.295456	0.502954	-0.530086
gi|448581|prf||1917268B pyruvate dehydrogenase:SUBUNIT=beta	1	0	1.0063	-0.046211	-0.185803	-0.52799
gi|335297609|ref|XP_003358079.1| PREDICTED: synaptic vesicle membrane protein VAT-1 homolog [Sus scrofa]	1	0	0.273106	-0.253465	0.171328	-0.52799
gi|350584903|ref|XP_003126945.3| PREDICTED: AP-1 complex subunit gamma-1 isoform 1 [Sus scrofa]	1	0	0.610106	-0.264862	-0.066969	-0.522421
gi|350594033|ref|XP_003483821.1| PREDICTED: UDP-glucuronosyltransferase 1-10 isoform 2 [Sus scrofa]	1	0	0.434785	0.255859	0.072887	-0.509809
gi|311250082|ref|XP_003123949.1| PREDICTED: isochorismatase domain-containing protein 1-like [Sus scrofa]	1	0	-0.005949	-0.222063	0.054374	-0.501346
gi|349732194|ref|NP_001231852.1| armadillo repeat containing 10 [Sus scrofa] >gi|350588904|ref|XP_003482738.1| PREDICTED: armadillo repeat-containing protein 10-like isoform 1 [Sus scrofa]	1	0	1.23612	-0.178204	0.567929	-0.491536
[truncated: 198 more rows]
[truncated: 23 more columns]

## Sheet: bin 7
Gene	GWEIGHT	114	115	116	117	118
EWEIGHT		1	1	1	1	1
gi|350582674|ref|XP_003125400.3| PREDICTED: apolipoprotein B-100-like [Sus scrofa]	1	0	0.543142	-0.150096	-0.372171	-1.6644
[truncated: 264 more rows]
[truncated: 106 more columns]

## Sheet: bin 8
Gene	GWEIGHT	114	115	116	117	118
[truncated: 61 more rows]

[truncated: 5 more sheets: bin 9, GO, bin6+7, up bin0+1+2, down bin4+7+8+9]
